# Supplementary material for: Global map of oxytocin/vasopressin-like neuropeptide signalling in insects
Source: PubMed Central journal article supplement (PMC5153645; doi:10.1038/srep39177), 2016-12-13
Supplement: srep39177-s1.pdf [file srep39177-s1.pdf]

## **Supplementary Information**

### **Global map of oxytocin/vasopressin-like neuropeptide signalling in insects**

Zita Liutkeviciute<sup>1,2</sup>, Johannes Koehbach<sup>2</sup>, Thomas Eder<sup>3,4</sup>, Esther Gil-Mansilla<sup>1</sup> and Christian W. Gruber<sup>1,2</sup>

<sup>1</sup>*Medical University of Vienna, Center for Physiology and Pharmacology, Vienna, 1090, Austria*

<sup>2</sup>*The University of Queensland, School of Biomedical Sciences, St Lucia, 4072, Australia*

<sup>3</sup>*University of Vienna, CUBE-Division of Computational Systems Biology, Department of Microbiology and Ecosystem Science, Vienna, 1090, Austria*

<sup>4</sup>*Ludwig Boltzmann Institute for Cancer Research, Medical University of Vienna, 1090 Vienna, Austria*

#### **Table of Contents**

|                                                                                                                              |     |
|------------------------------------------------------------------------------------------------------------------------------|-----|
| Supplementary Figure S1. Alignment of inotocin precursors .....                                                              | S2  |
| Supplementary Figure S2. Alignment of multiple copies of inotocin precursors and receptors. ....                             | S13 |
| Supplementary Figure S3.....                                                                                                 | S18 |
| Supplementary Figure S4. Discrimination between oxytocin/vasopressin-like and crustacean cardioactive peptide receptors..... | S43 |
| Supplementary Figure S5. Phylogenetic tree of inotocin receptors.....                                                        | S46 |
| Supplementary Figure S6. Alignment of selected inotocin-like receptors and precursors. ....                                  | S48 |
| Supplementary Data S1. Putative inotocin precursors.....                                                                     | S50 |
| Supplementary Data S2. Putative inotocin receptors.....                                                                      | S59 |
| Supplementary Table S1. List of analysed arthropod species .....                                                             | S82 |
| Supplementary Table S2. List of species and accession numbers used to prepare dataset .....                                  | S90 |
| Supplementary References.....                                                                                                | S94 |

**Supplementary Figure S1. Alignment of inotocin precursors.** Putative mature inotocin peptide sequences are highlighted in green; amidation sequences are shown in grey; conserved vicinal cysteine pairs of the neurophysin domain are highlighted in magenta; additional C-terminal residues of decapeptides as well as ambiguous C-terminal peptide sequences are highlighted in red. (A) Alignment of 110 inotocin precursor sequences encoding for putative inotocin and inotocin-like peptides. (B) Alignment of 23 inotocin precursors containing neurophysin domains but lacking inotocin peptide domains.

| (A)                           | 1                                | 50                   |
|-------------------------------|----------------------------------|----------------------|
| Calanus_finmarchicus1         | MITSWKILDPRIRRSWSFLIILLAQTMSASHG | CFISNCPVSGKKRSVSGEE  |
| Calanus_finmarchicus3         | MITSLKILDPSIRRSWRFLMILLAHTIPDSHG | CFISNCPVSGKKRSVSGEE  |
| Daphnia_pulex                 | -----MAGLWTFCLIALSMTEMI IPLTAKP  | CFITNCPVSGKKRSSQLVE  |
| Daphnia_magna                 | -----MAALWTLCLIAFSILEMTMPSSAAKP  | CFITNCPVSGKKRSGHVSE  |
| Lepeophtheirus_salmonis       | -----MAFGYPLITLTLIFQIANAC        | CFITNCPVSGKKKSGSGST  |
| Caligus_rogercresseyi         | -----MALCLLQVTES                 | CFITNCPVSGGRKRPADPG  |
| Dermatophagoides_farina       | --MFRRESFSMMKIIILVLCIWIICLFNDVRG | CFITNCPVSGKKRSIMTES  |
| Sarcoptes_scabiei             | --MLFQQTNYLFRSISILVMIVLIVEN-VRG  | CFITNCPVSGKKRSMIAAI  |
| Symphylella_vulgaris          | -----MSSGKSDITNAFVLLTFVSTVSA     | CFITNCPVSGKKRS-----  |
| Tigriopus_californicus        | -----MQITFDRRCFIVLGLLSLLKAVSVNS  | CFITNCPVSGKKR-----   |
| Metaseiulus_occidentalis      | -----MKLVALYFLSVSSLSWA           | CFITNCPVSGKKRS-----  |
| Varroa_destructor             | -----MKLHVVLVLANIVGLSLT          | CFITNCPVSGKKRSD----  |
| Gryllotalpa_sp                | -----MKVYYLLVFIISLIVLNTA         | CMINCPVSGKKR-AMKIN   |
| Teleogryllus_commodus         | -----MAQFKLYSNIIVLMMILTFSCA      | CMINCPVSGKKRSAMENN   |
| Haploembia_palau              | -----MINFRFARFIIITLAAVCTA        | CLITNCPVSGKKRSLHLHG- |
| Aposthonia_japonica           | -----MVNFRFARFIIITLAVVCTG        | CLITNCPVSGKKRSLAHG-  |
| Zootermopsis_nevadensis       | -----MKMQLGTATLLAVFISLCTA        | CLITNCPVSGKKRAGTHSQ  |
| Blattella_germanica           | -----MQLALVFLVFCAVCRA            | CLITNCPVSGKKRAGVQSQ  |
| Galloisiana_yuasai            | -----MRLKQCLRMLALLVAVVGISSA      | CLITNCPVSGKKRALNHS-  |
| Locusta_migratoria_manilensis | -----MKPQLAVLLALVVSLAAA          | CLITNCPVSGKKR-----   |
| Nilaparvata_lugens            | -----MKNTTSIGIMLFYAVGLAAG        | CLITNCPVSGKKRGLHSYM  |
| Halyomorpha_halys             | -----MYRALLFLTALCLVQS            | CLITNCPVSGKKRSLRPG   |
| Homalodisca_vitripennis       | -----MRGAVLTVCSLATA              | CLITNCPVSGKKRSQSTID  |
| Gynaikothrips_ficorum         | -----MICVKIPIFLLLLAMTSA          | CLITNCPVSGKKRNGARPP  |
| Cotesia_vestalis              | -----MMHKFLLVFFFITSSFA           | CLITNCPVSGKKRSGES--- |
| Microplitis_demolitor         | -----MNLPGTMIRKIFAVVFLSTSA       | CLITNCPVSGKKRSGES--- |
| Fopius_arisanus               | -----MSKIIILIMSALICMSSA          | CLITNCPVSGKKRGEN---  |
| Diachasma_alloem              | -----MSKIIILISALVCVSCA           | CLITNCPVSGKKRGEN---  |
| Telenomus_podisi              | -----MIAWVIVLVSIIFSLSSA          | CLITNCPVSGKKRADQ---  |
| Nasonia_giraulti              | -----MSKVIIVLTTLVLSYSG           | CLITNCPVSGKKRSGD---  |
| Nasonia_vitripennis           | -----MSKVIIVLTTLVLSYSG           | CLITNCPVSGKKRSGD---  |
| Copidosoma_floridanum         | -----MLKVSIVLLALVSVAYS           | CLITNCPVSGKKRSGD---  |
| Trichogramma_pretiosum        | -----MLKVIIVFVFMVFLSLSHC         | CLITNCPVSGKKRSGD---  |
| Brachycystis_timberlakei      | -----MLKKFILIAILISLSYSG          | CLITNCPVSGKKRSGE---  |
| Crioscolia_alcione            | -----YG                          | CLITNCPVSGKKRSGE---  |
| Chrysis_viridula              | -----MQYKMLTKLILFASMFVAVYG       | CLITNCPVSGKKRSGD---  |
| Trachymyrmex_septentrionalis  | -----MLKELIVFASLIFLSYA           | CLITNCPVSGKKRSD---   |
| Trachymyrmex_cornetzi         | -----MLKELIVFASLIFLSYA           | CLITNCPVSGKKRSD---   |
| Atta_cephalotes               | -----MLKELIVFASLIFLSYA           | CLITNCPVSGKKRSD---   |
| Trachymyrmex_zeteki           | -----MLKELIVFASLIFLSYA           | CLITNCPVSGKKRSD---   |
| Acromyrmex_echinator          | -----MLKELIVFASLIFLSYA           | CLITNCPVSGKKRSD---   |
| Vollenhovia_emoryi            | -----MLKEFVIFASLIFLSYA           | CLITNCPVSGKKRSGD---  |
| Solenopsis_invicta            | -----MLKELVVLASLIFLSYA           | CLITNCPVSGKKRSGD---  |
| Monomorium_sp                 | -----MLKEFVVFASLIFFSYSG          | CLITNCPVSGKKRSGD---  |
| Wasmannia_auropunctata        | -----MLKELVVLMSLIFLSYA           | CLITNCPVSGKKRNN---   |
| Harpegnathos_saltator         | -----MLRELVVVFASLIFLSYA          | CLITNCPVSGKKRSGD---  |
| Dinoponera_quadriceps         | -----MLRELVVLASLIFLSYA           | CLITNCPVSGKKRSGD---  |
| Cerapachys_biroi              | -----MLKKLVVFATLIFLSYA           | CLITNCPVSGKKRSGD---  |
| Linepithema_humile            | -----MLKELIVFANLILLSYA           | CLITNCPVSGKKRSGD---  |
| Pogonomyrmex_barbatus         | -----MLKKIVVFASLIFLSYA           | CLITNCPVSGKKRSD---   |
| Camponotus_floridanus         | -----MLKQLVICASLIFLSHA           | CLIVNCPVSGKKRSD---   |
| Pseudomasaris_vespoides       | -----MAKELIVLIAIVVLSASA          | CLITNCPVSGKKRG---    |
| Chyphotes_mellipes            | -----MAKELVFVAALLVVAYG           | CLITNCPVSGKKRGGGKHG  |
| Athalia_rosae                 | -----MFQKTAIILLVSSALG            | CLINCPVSGKKRNGA---   |
| Neodiprion_lecontei           | -----MFRKIVVILFVSSTLG            | CLINCPVSGKKRGGG---   |
| Cephus_cinctus                | -----MLKCLTVIMVIFISISFA          | CLITNCPVSGKKRSGA---  |
| Polistes_canadensis           | -----MTKKILIFTSFIFISSA           | CLITNCPVSGKKRSGD---  |
| Polistes_metricus             | -----MTKKILIFTSFIFISSA           | CLITNCPVSGKKRSGD---  |
| Polistes_dominula             | -----MTKKILIFTSFIFITSA           | CLITNCPVSGKKRSGD---  |
| Mischocyttarus_flavitaris     | -----MTKQILVIFITSFILISSA         | CLITNCPVSGKKRVNDKV-  |
| Corydalus_cornutus            | -----MYPVVKYFVLVIVLVSVMIDS       | CLITNCPVSGKKRNGSDRI  |
| Onthophagus_taurus            | -----MVKLIIFTLILCIIQDQLSHG       | CLITNCPVSGKKRNGR-IN  |
| Aleochara_curtula             | -----MFSSKCLLIVGLACVVLQAVDG      | CLITNCPVSGKKRSGKYL   |

Nicrophorus\_vespilloides --MHSPSTMFILKSSALLLVAVVFLGDCSCLITNCPRGGKR---AMQ  
Oryctes\_borbonicus -----MNSLLLIGVFCIAGDQLEIEGCLITNCPRGGKRS GKMSH  
Anoplophora\_glabripennis -----MFKNILLLVLLVVFGEIFVNCCLITNCPRGGKRS GKFGA  
Leptinotarsa\_decemlineata1 -----MVRSVPLTIIYLFIFVMYVESCLITNCPKGGKRGGEFST  
Leptinotarsa\_decemlineata2 -----MSKTVSLFTLFLSVFVIFVESCLITNCPGIGGKRS GKFSL  
Priacma\_serrata -----AFFVLNSFLADSCLITNCPRGGKRS--RYN  
Gyrinus\_marinus -----ALLDICDSCLITNCPRGGKRSGRSQH  
Dendroctonus\_ponderosae ---MTRSRSKIAKMISQILMFILLSNILVSGCLITNCPRGGKRS GKGYL  
Meloe\_violaceus -----ATNKFLLVLIIVLTIPTNYFINGCLITNCPRGGKRG NTRYL  
Tribolium\_castaneum -----MSTIITSIILLVLSSELSVSGCLITNCPRGGKR--SKFA  
Hypothenemus\_hampeii ---MVSKRNLICTAGSNSTKLSIFMACLITVSGCLITNCPRGGKRS GKFLA  
Agrilus\_planipennis -----MYTNVCLVFVIVLVCYSLVFGCLITNCPRGGKRS GKME  
Arachnocampa\_luminosa MNENFLMMNLNDKKNLILFLLVVINLVINACYITNCPWG GKRSPQFLD  
Tetranychus\_urticae -----MLASFILLTFILNFHSSQACFITNCPGGKRS--HGD  
Scolopendra\_subspinipes1 -----HWLLFFYVIGMTSSCFITNCPGGKRS GKFE--  
Scolopendra\_subspinipes2 -----MRSSTCHWILYLSLVGLVSAICYIINCIDN GKRKRSIDH  
Strigamia\_maritima -----MKSTHFVNIIFYSVFIIMADGCYITNCPGGKRS GKNEK--  
Limulus\_polyphemus -----MHWTSFIMILGFCLAVTIKGCYITNCPGGKRS IGTF--  
Litopenaeus\_vannamei -----MQISAVVAMALLLGSGTACFITNCPGGKRS SPFAQ  
Homarus\_americanus -----MQLGVVVVMTVVVVGSTACFITNCPGGKRS GMSTAQ  
Occasjapyx\_japonicus -----MSSPVRIHPRLLALACVFCISSACFITNCPGGKRS QQAHY  
Catajapyx\_aquilonaris -----MSPFRVHQTLLAVACIFCITSACFITNCPGGKRS Q--SHY  
Lithobius\_forficatus -----MASHAAQSSVFLVLLCVFHIITLACFITNCPGGKRS LKGDQ  
Meinertellus\_cundinamarcensis -----MKSSMSTPAALFALLFVVSITSSCFITNCPGGKRS RAGAPG  
Machilis\_hrabei -----MSADMTNSASSTFALFTLLLFVGCVTS CFITNCPGGKRS LKSPG  
Tricholepidion\_gertschii -----MVARKNPQTVVICLMAAMSAATA CFITNCPGGKRS MGQVG  
Atelura\_formicaria -----ACFITNCPGGKRS MGQMG  
Atelura\_formicaria2 -----SLSKGILSVTIFFLAVISVTTACFITNCPGGKRS MGQMG  
Speleonectes\_cf\_tumulensis -----MHLRPMDVLLSALCVLHVAGISTACFITNCPGGKRS LKRTVRTL  
Anurida\_maritima -----MRKYHTSIIICLVWLVSVSAAF CFITNCPGGKRS--SGP  
Pogonognathellus\_sp -----MIQFVTYNLWLVVLSVFAASGCFITNCPGGKRS--SGT  
Folsomia\_candida -----MKTSLLFAGFIVMVESLVLVSGCFITNCPGGKRS--SG-  
Sminthurus\_viridis -----MINLNCGICLFLITLSVVTGCFITNCPGGKRS--SG-  
Ephemera\_danica -----MHRKYEMATKVYLLTALIIIVQVTTACFITNCPGGKRS SAVVS  
Triops\_cancriformis -----IHSAPCFITNCPGGKRS-----  
Eurylophella\_sp -----MVHRRGATLSAMLIVHVVSACFITNCPGGKRS-----  
Ixodes\_scapularis -----MALSHMLLLAVVGGTSA CFITNCPGGKRS SEPS-  
Ixodes\_ricinus -----MALSHMLLLAVVGGTSA CFITNCPGGKRS SEPS-  
Ladona\_fulva ---MYSRQGM SMDQRQWLLVAVIFALLGLTSA CFITNCPGGKRS DVAFG  
Menopon\_gallinae -----MYNIFQQLRLGLLVATFGLVVSCLITNCPRGGKRS LKSLD  
Pseudomallada\_prasinus -----MNNNSLKATIVTFVIFTLLVHSCCLITNCPRGGKRS--NLLD  
Liposcelis\_bostrychophila -----MNTFQFVVLYIFVNSVNSCLITNCPRGGKRS DGSENN  
Diaphorina\_citri -----MYAMISRLLVCLVGYWYFFGSTWCCLINCPG GKR SALLMAL  
Apachyus\_sp -----MSFSLRFFAIFTLLCLGTGCLITNCPKGGKRS-----  
Pachyphylla\_venusta -----MIPKIFFFLIFLCLNFSFSCLISNCPKGGKRS-----  
Cryptocercus\_wrightii -----QLGTLATLAILLIGVCTACCLITNCPKGGKRS-----  
Orussus\_abietinus -----MKELLALYVLISAGYC--CLITNCPRGGKRSHHSES  
\* \* :\*

51

100

Calanus\_finmarchicus1 QMVSFQAR-----EEVLACPS-NPAGLCYSPGLCC-VQGGCYADK  
Calanus\_finmarchicus3 QLVSFQAR-----EEVLACPS-NPAGLCYSPGLCC-IQGACYADM  
Daphnia\_pulex -----PSSYLECAPCGP-AGKGTCLGANLCCGSHFGCFFKT  
Daphnia\_magna DPSSFQGVA--EERPLLHQASCAGP-GGKGT CFGASLCCGSEFGCFFKT  
Lepeophtheirus\_salmonis NLGFLNSSF-----QYQCSSCGP-NNTGRCFGPRLCCSSEFGCFVYS  
Caligus\_rogercresseyi -LFSPKNRR-----QLDECSPCGP-SNEGRCYGNLCCGSTFGCFVYA  
Dermatophagoides\_farina NLGSNHKKK-----IKIKCTRCPG-SLSGRCYGNICCSPLTGNVGG  
Sarcoptes\_scabiei GSSTQTRR-----ECIRCPG-GLSGRCYGPSICCSPLFGCNVGG  
Symphylella\_vulgaris -----GHSLSSSVALRQCSPCGP-GGAGRCFGKSACCVPMGMGCFLGP  
Tigriopus\_californicus -----SELLT--VASRKCPCPGP-LGMGQCFGSPMCCGQYIGCHLNT  
Metaseiulus\_occidentalis -----AAFGLQLYSNEYRRCPPCGP-GSSGQCFGPGICCTPDY-CVLDP  
Varroa\_destructor -----TGFGVLQFSSDFRKCPCPGP-GSTGQCFGPNICCNSES-CLIDA  
Gryllotalpa\_sp E-----ISSIRSCARCGL-NNAGHCYGPDI CCAPELGCLLIAT  
Teleogryllus\_commodus E-----ILPIRNCARCAGP-NNTGHCYGPSTCCAEELGCLMGG  
Haploembia\_palaui -----TESVRQPCRCGP-AKLGHCFGPTICCGHEIGCLINT  
Aposthonia\_japonica -----SESLRQCPCRCGP-AKLGHCFGPTICCGHEIGCLINT  
Zootermopsis\_nevadensis EL-----HT-IRQCARCAGP-AKLGHCYGPDI CCAPELGCLLIAT  
Blattella\_germanica DS-----TVSIRQCARCAGP-AKLGHCYGPDI CCAPELGCLLIAT  
Galloisiana\_yuasai -----KDSVRQPCRCGP-AKLGHCYGPDI CCAPELGCLLIAT  
Locusta\_migratoria\_manilensis -----ASLQHRCAACGP-GGQGVCLGPHICCGPRMGCRLAS  
Nilaparvata\_lugens KKLAEKMA----LAQVPLQCARCAGP-EGEGYCMGPSICCGPQLGCLLAS  
Halyomorpha\_halys RDP-----DCRRCGP-GLEGRCVGTVC CGPRLIGCLIGT  
Homalodisca\_vitripennis NTLGTE-----IVSLVACLRCGP-GLQGRCLGPAVCCGPRLGLCLVAT  
Gynaikothrips\_ficorum TKG-----SIEELPFCTLCGPPELGGLCFGPTMCCSPTGGCELGE  
Cotesia\_vestalis ---PLLS-----MPSLIKECSSCGP-GDQGCFCGPHICCGASIGCYIRS  
Microplitis\_demolitor ---PLLS-----MPSLIKECSSCGP-NDQGCFCGPHICCGATIGCYIKG  
Fopius\_arisanus ---PLLS-----LHSLAAECPSCGP-GHQGCFCGPNICCGTIGCFIGT  
Diachasma\_alloeuum ---PLLS-----LHSLAAECPSCGP-GHQGCFCGPNICCGTIGCFIGT

Telenomus\_podisi ---SLML-----METSIRECTSCGR-DGSGRCFGPYICCGSTIGCFIGT  
Nasonia\_giraulti ---PTFL-----LENIARECPACGR-EEQGRFCFGPHICCSPSMGCLIGT  
Nasonia\_vitripennis ---PTFL-----LENIARECPACGR-EEQGRFCFGPHICCSPSMGCLIGT  
Copidosoma\_floridanum ---PTFL-----LENIARECPACGH-EEQGRFCFGPHICCGPSMGCHIGT  
Trichogramma\_pretiosum ---PTFF-----LENIARECPVCGH-EEQGHFCFGPHICCSPSMGCLIGT  
Brachycistis\_timberlakei ---AVVS-----LETIARECPSCGP-NRAGQCFGPHICCGPTIGCFIGT  
Crioscobia\_alcione ---IAPL-----LESVARECPSCGP-NHSGQCFGPHICCGPNIGCFIRT  
Chrysis\_viridula ---SAVT-----LDHLARECPSCGP-NRLGQCFGPHICCGPSIGCFIGT  
Trachymyrmex\_septentrionalis ---VASS-----LKTVIRECPSCGP-NHLGQCFGPHYICCGPSIGCFIGT  
Trachymyrmex\_cornetzi ---IASS-----FKTVIRECPSCGP-NHLGQCFGPHYICCGPSIGCFIGT  
Atta\_cephalotes ---VASS-----LRTVIRECPSCGP-NHLGQCFGPHYICCGPSIGCFIGT  
Trachymyrmex\_zeteki ---IASS-----LRTVIRECPSCGP-NHLGQCFGPHYICCGPSIGCFIGT  
Acromyrmex\_echinator ---IAS-----LKTVIRECPSCGP-NHLGQCFGPHYICCGPSIGCFIGT  
Vollenhovia\_emoryi ---IAPS-----LGTVVRECPSCGP-NRLGQCFGPHYICCGPSIGCFIGT  
Solenopsis\_invicta ---IAPS-----LGTVERECPSCGP-NRLGQCFGPHICCGPSIGCFIGT  
Monomorium\_sp ---IVPS-----LGTVARECSSCGP-NRLGQCFGPHICCGPSIGCFIGT  
Wasmannia\_auropunctata ---IASS-----LETVARECPSCGP-NHQGQCFGPHYICCGPSIGCFIGT  
Harpegnathos\_saltator ---IIPS-----LGTVTRECPSCGP-NHLGQCFGPHICCGPTIGCFIGT  
Dinoponera\_quadriceps ---IAPS-----LGVVTRECLCGP-NHLGQCFGPHICCGPSIGCFIGT  
Cerapachys\_biroi ---IAPS-----LGTVARECPSCGP-NHLGQCFGPHICCGPSIGCFIGT  
Linepithema\_humile ---IAP-----LETIARECPSCGP-NHLGQCFGPHICCGPSIGCFIGT  
Pogonomyrmex\_barbatus ---LAP-----LGNVVRECPSCGP-NHLGQCFGPHICCGPNIGCFIGT  
Camponotus\_floridanus ---IASF-----LKTVTRECPSCGP-NHMGQCFGPHICCGPNIGCFIGT  
Pseudomasaris\_vespoides ---DIAA-----LESVVRECPACGP-NRSGQCFGPHICCGPTIGCYIGT  
Chyphotes\_mellipes EVVPAFE-----DVRVTRECPSCGP-NRLGRCFGPHICCGPTIGCFIGT  
Athalia\_rosae ---LLP-----LKNPIRECPACGP-EMQGQCFGPKICCGPSIGCFEFGT  
Neodiprion\_lecontei ---FNP-----FKYQVRECSTCGP-DRQGQCFGPKICCGPSIGCFEFGT  
Cephus\_cinctus ---ITS-----LENIVRECPSCGA-DKQGQCFGPHICCGPSIGCLIGT  
Polistes\_canadensis ---IEV-----PESPIRECLPCGP-SQLGQCFGPHICCGPTFGCHIGT  
Polistes\_metricus ---IEV-----PESPIRECLPCGP-SQLGQCFGPHICCGPTFGCHIGT  
Polistes\_dominula ---IEV-----PES-IRECLPCGP-NQLGQCFGPKICCGPTFGCHIGT  
Mischocyttarus\_flavitaris ---PLVTT-----TEYPVKDCISCGP-NGQGQCFGPHICCGPTFGCHMGT  
Corydalus\_cornutus SNEQFIK-----QCISCGP-QRSGQCFGPHICCGS-FGCLVGT  
Onthophagus\_taurus SLDTNIK-----QCISCGP-ARSGQCFGPHICCGP-FGCLIGT  
Aleochara\_curtula DNNIKP-----CIACGP-GHSGQCFGPHICCGP-FGCLLGT  
Microphorus\_vespilloides DNTQIQ-----CITCGP-GRSGQCFGPHICCGP-FGCLLGT  
Oryctes\_borbonicus LAAAN-----QCVSCGP-GHTGQCFGPHICCGP-FGCLVGT  
Anoplophora\_glabripennis LEANIK-----FQCVSCGP-GHSGQCFGPHICCGP-FGCLMGT  
Leptinotarsa\_decemlineata1 SESNIKTVSNLNKYKHILQCISCGP-GHTGKCFGPHICCGP-FGCLLGS  
Leptinotarsa\_decemlineata2 TESNIK-----QCISCGP-GHTGQCFGPHICCGP-FGCLMGS  
Priacma\_serrata EEN-----IKQCISCGP-AHSGQCFGPHICCGP-FGCLLGT  
Gyrinus\_marinus ENN-----IKQCISCGP-GRSGQCFGPHICCGP-FGCLMGT  
Dendroctonus\_ponderosae STSNNIKQVIQFSLI---QCICPCGP-GGAGQCFGPHICCGP-FGCLLGT  
Meloe\_violaceus KQDTQIK-----QCINCGP-GNNGQCFGPHICCGP-FGCLFNT  
Tribolium\_castaneum ISENAVK-----PCVSCGP-GQSGQCFGPHICCGP-FGCLVGT  
Hypothenemus\_hampe AVVLFK-----CIPC GP-GGTGQCFGPHICCGP-FGCLLDT  
Agrilus\_planipennis GDIQP-----VCTSCGP-GLTGQCFGPHICCGP-FGCLLGT  
Arachnocampa\_luminosa SE-----NAHQCRKAS-G-LGMCFGPHICCGPDMGCLIDT  
Tetranychus\_urticae VD-----HMRELCRCGP-DNRGHCVSPNICCGTEFGCLINN  
Scolopendra\_subspinipes1 HKRTLRL-----QCTACGP-GSQGRFCGPHICCGEFGCYLKT  
Scolopendra\_subspinipes2 QKKAIR-----QCMSCGP-GMKGRFCGPHICCGEFGCYLKT  
Strigamia\_maritima SGRGVR-----QCTPCGP-GGIGRCYGPDICCGANVCFVGT  
Limulus\_polyphemus ATHYTR-----ECGQCGP-GGMGQCFGPHICCGSDIFGCFIKT  
Litopenaeus\_vannamei LG-----SVRTCAQCGP-GLQGRCMGPHICCGPEIGCYMGT  
Homarus\_americanus LG-----RTRTCTACGP-GLQGRCLGPHICCGVLGIGCFI  
Occasjapyx\_japonicus KPQAS-----RQCAVCGP-NGQGRFCGPHICCGPEIGCYMRT  
Catajapyx\_aquilonaris KPQAIRQ-----VSSAQCAVCGP-NGQGRFCGPHICCGPEIGCYLRT  
Lithobius\_forficatus G-----TTRQCTACGP-GGLGHCFGPHICCGPQIGCFLHT  
Meinertellus\_cundinamarcensis PRGVQR-----QCPSCGP-HRSGRCFGPHICCGEFGCHLGG  
Machilis\_hrabei PRGEPR-----QCPSCGP-RHSGRCFGPHICCGEFGCHLGA  
Tricholepidion\_gertschi -THATR-----ECTSCGP-AKLGRCYGPDICCGPQIGCLVGT  
Atelura\_formicarial -LHVNK-----QCTSCGP-ARTGRCYGPDICCGPRFGCLVGT  
Atelura\_formicaria2 -LHANK-----QCTSCGP-ARMGRCYGPDICCGPRFGCLVGT  
Speleonectes\_cf\_tumulensis KSSTR-----QCTSCGPDLLG-RCYSPNICCGPES-----  
Anurida\_maritima LSTQAR-----QCESCGPEGSGRCYGPDICCSPGSGCLIGT  
Pogonognathellus\_sp TALTVR-----QCERCPPGMMGRCFGPHICCSPEFGCFST  
Folsomia\_candida ADTKIR-----QCEQCPPGMMGLCYGPHICCSSELGLCFGT  
Sminthurus\_viridis IERKTR-----QCEQCPPGAGGRCYGPDICCSPELGLCIAT  
Ephemera\_danica ETQPKSVIRQFPITCSSYFVQCARCGPGLTGRCFGPHICCESRGLLGS  
Triops\_cancriformis -----FPMSQQHFL-----  
Eurylophella\_sp -----SSITTVNARQCSRCGPGLSGRCFGPHICCDSTRRCMLAS  
Ixodes\_scapularis -----PARLCPRCGPAGRGVCYSADVCCAGSMCILNDALATLSCRAE  
Ixodes\_ricinus -----PARLVS-----SQFRSSLTVSWC  
Ladona\_fulva R-----IPLRQVMVSSVLSFKCSRCGFGRCFGPHICCSLKTGCLLAE  
Menopon\_gallinae KTSS-YP-----DTNYCIPC GP-DDQGVCLGNVCC-SREGCTTRS  
Pseudomallada\_prasinus S-----  
Liposcelis\_bostrychophila LIEAPRS-----DIKTCTPCGP-NNQVCIGRDICCCKHLGLCLISS

Diaphorina\_citri  
Apachyus\_sp  
Pachypsylla\_venusta  
Cryptocercus\_wrighti  
Orussus\_abietinus

EERRQSHQKR--AKLWNRNIISCNAWGAEGVCVGLCCDPSRSEGDPGS  
-----TSITVFSILKF-----  
-----FDKKFPQNKKEIFDKSKVSTLYI  
-----AGSHSQDHPHQVFLGYLTLTYQLL  
PETTIEK-----FPLAGLYDQSRYPSSLHVYNDQFIDSYARS

Calanus\_finmarchicus1  
Calanus\_finmarchicus3  
Daphnia\_pulex  
Daphnia\_magna  
Lepeophtheirus\_salmonis  
Caligus\_rogercresseyi  
Dermatophagoides\_farina  
Sarcoptes\_scabiei  
Symphylella\_vulgaris  
Tigriopus\_californicus  
Metaseiulus\_occidentalis  
Varroa\_destructor  
Gryllotalpa\_sp  
Teleogryllus\_commodus  
Haploembia\_palau  
Aposthonia\_japonica  
Zootermopsis\_nevadensis  
Blattella\_germanica  
Galloisiana\_yuasai  
Locusta\_migratoria\_manilensis  
Nilaparvata\_lugens  
Halyomorpha\_halys  
Homalodisca\_vitripennis  
Gynaikothrips\_ficorum  
Cotesia\_vestalis  
Microplitis\_demolitor  
Fopius\_arisanus  
Diachasma\_alloenum  
Telenomus\_podisi  
Nasonia\_giraulti  
Nasonia\_vitripennis  
Copidosoma\_floridanum  
Trichogramma\_pretiosum  
Brachycistis\_timberlakei  
Crioscolia\_alcione  
Chrysis\_viridula  
Trachymyrmex\_septentrionalis  
Trachymyrmex\_cornetzi  
Atta\_cephalotes  
Trachymyrmex\_zeteki  
Acromyrmex\_echinator  
Vollenhovia\_emeryi  
Solenopsis\_invicta  
Monomorium\_sp  
Wasmannia\_aeropunctata  
Harpegnathos\_saltator  
Dinoponera\_quadricaps  
Cerapachys\_biroi  
Linepithema\_humile  
Pogonomyrmex\_barbatus  
Camponotus\_floridanus  
Pseudomasaris\_vespoides  
Chyphotes\_mellipes  
Athalia\_rosae  
Neodiprion\_lecontei  
Cephus\_cinctus  
Polistes\_canadensis  
Polistes\_metricus  
Polistes\_dominula  
Mischocyttarus\_flavivittatus  
Corydalus\_cornutus  
Onthophagus\_taurus  
Aleochara\_curtula  
Microphorus\_vespilloides  
Oryctes\_borbonicus  
Anoplophora\_glabripennis  
Leptinotarsa\_decemlineata1  
Leptinotarsa\_decemlineata2  
Priaema\_serrata  
Gyrinus\_marinus

101 150  
GCLPQMEESRENREPRNLNRDL-----RFLYGWAPAHEKMFQQTG  
-----  
-----EETN  
-----NETN  
NDIAKN-PCQTEAYDPVPCQ-----NNVKSCSSVLKNG  
KSLQHQNPCLEARLPLPCR-----NKGSGCSGILENG  
---FTAARCSLEAYHPILCT-----NPGTVCGPNKG-G  
---FASSRCALEAFNPMLCS-----NPGSACGNKG-G  
AHT---ATCRLEHSYP-----VPCDNGTPACGENGNG  
PDT---QVCKTENSNP-----IPCDNDVPRCQSVRRG  
VG---LSTCKSEALKM-----TPCNINRPRCGAENKG  
GDSPHLRSCKREALKL-----KPCNTNTGMRCGSENKG  
PETVPCQEEESQSPD-----PCIDTDLGPACHNGK--G  
PEAKPCEAEALSPD-----PCVEPALGPRCFGQ--G  
PDTLVCLKEHLSPD-----PCVGPATATNCGNRK--G  
PDTLVCLKEHLSPD-----PCVGPSASNCGNRK--G  
PDTARCLSEAAASPV-----PCTAPTGAQCCEGKFA-G  
PETTRCLSEAAASPS-----PCTTPSGAPCGSGKNA-G  
ADTAICQGESLYPE-----PCAN-TMPASSCRGEA-G  
-ADADAACRAAPP-----CPLDSEPMRCAAGRGR--  
PATLNQCAGSVLPP-----QSPNSPAPTCYMPDGY-G  
PAVLSQCAAEPMLQ-----RGGQR-----CSI-G  
PGIVRQCAGAAEGP-----SPHGKP---CITPSGL-G  
PHVASCLGVHTVPPPLCRLPPQSMPLNGPYSAPSQTRATSLVTTCSG-G  
PETYKCRKE-SLHSH-----PCVSGFAMCRDNT-A  
PETYKCRKE-SLYSH-----PCVSGFAMCRDNT-A  
PETYKCRTE-SLYSR-----PCIAGFAMCRDNT-G  
PETYKCRTE-SLYSR-----PCIAGFAMCRDNT-G  
PETYKCRKE-SLYSK-----PCIAGFAMCRDNT-G  
PETLRCRKE-SLYSR-----PCVAGFAMCQGN-G  
PETLRCRKE-SLYSR-----PCVAGFAMCQGN-G  
LETLRCRKE-SLYSR-----PCVAGFAMCQGN-G  
SETLRCRKE-SLYSR-----PCVAGFAMCQNNN-G  
PETYRCRKE-SLFSR-----PCIAGYAMCRGNT-A  
PETYRCRKE-SLFSR-----PCIAGYAMCRGNT-A  
PETYKCRKE-SLFSR-----PCVAGYAMCRGNS-A  
PETYQCRKE-SLYTR-----PCIAGYAMCRGNT-A  
PETFRCRKE-SLYTR-----PCIAGYAMCRGNT-A  
PETFRCRKE-SLYTR-----PCIAGYAMCRGNT-A  
PETSRCRKE-SLYTR-----PCIAGYAMCRGNT-A  
PETFRCRKE-SLYTR-----PCIAGYAMCRGNT-A  
PETYRCRKE-SLYTR-----PCVAGYAMCRGNT-A  
PETYRCRKE-SLYTR-----PCIAGYAMCRGNT-A  
PETYRCRKE-SLYTR-----PCIAGYAMCRGNT-A  
PETYRCRKE-SLYTR-----PCIAGYAMCRGNT-A  
PETYRCRKE-SLYTR-----PCIAGYAMCRGNT-A  
PETYRCRKE-SLYTR-----PCIAGYAMCRGNT-A  
PETYRCRKE-SLYTR-----PCIAGYAMCRGNT-A  
PETHKCRKE-SLFSR-----PCIAGYAMCRGNT-G  
SQTQKCRKE-QFDSS-----PCMAGFAMCNGNK-G  
SQTQKCRKE-QFDSS-----PCMAGFAMCNGNK-G  
SQTQKCRKE-QFDTS-----PCLAGFAMCNGNK-G  
SYTKKCRKE-FSDQI-----SCLSGFAMCSGNV-G  
PETVRCARGGFHEPE-----PCIAGQASCRGDS-G  
PDTLKLCKEGQFHENE-----PCIAGNSSCRNS-G  
HETARCRRDGNFLEPE-----PCIAGNASCRNS-G  
QETVKCQREGFFHGFE-----PCIAGSAPCRKNT-G  
AETLRCQKDGFFHEAE-----PCIAGNSPCRNT-G  
PETLRCQREGFFHERE-----PCIAGGASCRKNT-G  
PETERCHKEGLFQETE-----PCIAGFSTCRKNT-G  
HETFGCQRG-GFHESE-----PCIAGFSSCRKNT-G  
SETIRQCQREGFFHERE-----PCIAGNAFCRKKH-R  
SDTIRCHREGYFDSE-----PC-----

Dendroctonus\_ponderosae  
 Meloe\_violaceus  
 Tribolium\_castaneum  
 Hypothenemus\_hampeii  
 Agrilus\_planipennis  
 Arachnocampa\_luminosa  
 Tetranychus\_urticae  
 Scolopendra\_subspinipes1  
 Scolopendra\_subspinipes2  
 Strigamia\_maritima  
 Limulus\_polyphemus  
 Litopenaeus\_vannamei  
 Homarus\_americanus  
 Occasjapyx\_japonicus  
 Catajapyx\_aquilonaris  
 Lithobius\_forficatus  
 Meinertellus\_cundinamarcensis  
 Machilis\_hrabei  
 Tricholepidion\_gertschi  
 Atelura\_formicaria1  
 Atelura\_formicaria2  
 Speleonectes\_cf\_tumulensis  
 Anurida\_maritima  
 Pogonognathellus\_sp  
 Folsomia\_candida  
 Sminthurus\_viridis  
 Ephemera\_danica  
 Triops\_cancriciformis  
 Eurylophella\_sp  
 Ixodes\_scapularis  
 Ixodes\_ricinus  
 Ladona\_fulva  
 Menopon\_gallinae  
 Pseudomallada\_prasinus  
 Liposcelis\_bostrychophila  
 Diaphorina\_citri  
 Apachyus\_sp  
 Pachypsylla\_venusta  
 Cryptocercus\_wrighti  
 Orussus\_abietinus

PETIRCQREGMFHESE-----PCIAGNSN-----  
 IDTVRCQKDGNFHQHE-----PCIAGFMNCHHYN-G  
 PETLRCQREGFFHERE-----PCIAGSAPCRKNT-G  
 PDSIHCQNEGMFYDLE-----PCTAGTMNCRKNT-G  
 SDSLKCKYEGLFNGPE-----PCIAGNSSCRWKH-G  
 KETSVCQLEDLKSNVPCQP-----YGKICDKVEF-G  
 HYSSPCRAENLIP-TPCKI-----PGKLCSSGE--G  
 RESAICRFENLSPIPCDND-----VLSCGP-----DGA  
 PESAVCHLENLSPVPCDND-----TPSCG-----LGA  
 RESAICRLENLYSLPCQNE-----GRACG-----TDG  
 RESVICRYENLQVIPCCKK-----GKICETV-----PHG  
 REAFLCRSENLVPTVCSNDD-----LKACGRQ-----REG  
 REARMCHAENLVPVTCANRD-----LKSCGRM-----QEG  
 RESSSCRAENLFPVQCENR-----ARPCGSE-----RSG  
 REASACRAENLFPVQCENK-----ARPCGSE-----RSG  
 R-----G  
 RD-PVCRGEMSAAPGLCTNP-----GRPCG-----VG  
 RD-ASCRREMSAPGLCINQ-----GRPCG-----VG  
 REAAVCQENFYPVPCANR-----GGQCGG-----ESG  
 RDTAVCQTEFNTPVPCGNR-----GPSCG-----ESG  
 RDTAVCQ-----  
 -----  
 PETVACRSEARFS-TPCLNP-----GISCSG-SGSLSIK  
 AETFVCQLENRFP-TPCHNP-----GSSCSGNGDTGLING  
 SETLTCFQENLMYNTPCQNP-----GESCSGNDATNPING  
 PETYSCQLENRHT-TLCQNP-----GATCAGPNGD-ISGG  
 PLEVFMPLCLVESLQPTP-----CRNQAASNCGLTGDE  
 -----  
 STEPSLLPCLAESMQTTP-----CRNRAASCGQSGAG  
 ALHGVACHVPGKRCGTDR-----CAIRGYCCGPDGCT  
 SLLGVDFQRMSFYRMPDY-----  
 KSNLPLLRPCAIEAGLPG-----ACISGSKRCGNSGG  
 RYTDPCRSIQNTRIS-----CLSEVNVQTCGDKG  
 -----  
 PSTKICRRVREFPES-----CLSSFN--PCNGG  
 KCGVDYKTCGSSRE-----VMEEYALCLSKGL  
 -----  
 GD-----  
 SL-----  
 ADTTKSATEACWENKEFL-----NDNGNQRKMKMLT

Calanus\_finmarchicus1  
 Calanus\_finmarchicus3  
 Daphnia\_pulex  
 Daphnia\_magna  
 Lepeophtheirus\_salmonis  
 Caligus\_rogercresseyi  
 Dermatophagoides\_farina  
 Sarcoptes\_scabiei  
 Symphylella\_vulgaris  
 Tigrionus\_californicus  
 Metaseiulus\_occidentalis  
 Varroa\_destructor  
 Gryllotalpa\_sp  
 Teleogryllus\_commodus  
 Haploembia\_palau  
 Aposthonia\_japonica  
 Zootermopsis\_nevadensis  
 Blattella\_germanica  
 Galloisiana\_yuasai  
 Locusta\_migratoria\_manilensis  
 Nilaparvata\_lugens  
 Halyomorpha\_halys  
 Homalodisca\_vitripennis  
 Gynaikothrips\_ficorum  
 Cotesia\_vestalis  
 Microplitis\_demolitor  
 Fopius\_arisanus  
 Diachasma\_alloem  
 Telenomus\_podisi  
 Nasonia\_giraulti  
 Nasonia\_vitripennis  
 Copidosoma\_floridanum  
 Trichogramma\_pretiosum  
 Brachyistis\_timberlakei  
 Crioscilia\_alcione

151 200  
 FSIPICIGPYCNGNEKIMIRKEKQSQEKKSDDKVLDGSSNYDSLVIYNNLS  
 -----  
 VCLLTNLKSTQICNQHFWKTDLKSASCSLNGDKIDGICVADLLCCSLGNL  
 ICLLTNLKSRSRSCDERFWQYFKSAPCSLNGDKLDGICVADRLCCSLGQC  
 QCVFDNYCCNSSSGTCRFVVEELICSVSDDKKNYEKEKELVDDLQKNMIYI  
 QCVFENYCCSPSGTCRFVDESICSNSTVPLGDS---DFMEDFRRLFLA  
 VCALNATCCCTNG---KYFICFFYCKKN-----  
 ICAINSTCCTDS---KI-----  
 RCAVEGLCCCTGDG-CFYEDTCRDS-----SLLTSSLHHSSTLEDET  
 FCATNGFCNDQGECTPEEKCLVENLSDFPSPFILRRHLSSASLASRPT  
 YCALNRLCCCTSDS-CTLDESCSSAKDRDILRESLMLN-----  
 HCALNRFCCCTS-----  
 HCGANNICCTQDS-CYSDQTCQFGFPVE-----  
 FCATSTLCCCTQVS-CHTDPSQCFVAVAGHKVSGATDLALPHRSYVYSLLN  
 KCAADGVCCCTPES-CEID-----  
 KCAADSI CCTPDS-CEIDASCRFGS--PQHFRNVGIYPQVVE-----  
 RCTANGVCCCTHES-CHIDITCQLTT--SDAPELIDVSADQTNPLYSLYS-  
 RCAANGVCCCTHES-CHIDVSCHPA--TDIAIGNTDQLNSFYNLNVISS  
 KCAANGICCTSES-CHVDMSCRLTSRGEDDVIQFPDLSSDAKGVFLFSN  
 -CSAPGVCCSQDS-CHIDPSCVADTEPADRYALDIFAVNDGDRDDMRI-  
 VCSTDGVCCNSSES-CRIDPTCEVDPDHNVCNVWTEPKNMAL-----  
 VCLADGVCCSPDG-CKMDMSCEVEQSVDVCSLAEQVY-----  
 VCATDGVCCNSGG-LYFPS---PQIRHIYRNFEISQY-----  
 ICAANGLCCTSDW-CRADDRLSSASQSNLVIPDHNL PANTRQEPQAEF  
 RCAANGICCSQES-CFLDSSCKIGDEFL-----SDRKIDQEF SRLIGEN  
 RCAANGICCSQES-CHVDPSCRVGEYFL-----SERKISQEF SRLIADN  
 RCAANGICCSQEN-CHADSSCRVGEFES-----DRKIVQEYSRLSPEN  
 RCAANGICCSQEN-CHVDSSCRISDEFN-----DRKIQEYSRLSPEN  
 RCAANGICCSQEA-CYAD-----  
 RCAANGICCSQES-CFIDSACKLVDETG-----NDRKIGAEFGAFLLN  
 RCAANGICCSQES-CFIDSACKLVDETG-----NDRKIGAEFGAFLLN  
 RCAANGICCSQES-CFTDSACKLVDESG-----NDRKIGAEFGAFLLN  
 RCAANGICCSQES-CFIDPACKLVDEN-----NDRKIGAEFGAFLLN  
 RCAANGICCSQES-CSMDAMCKIPDALR-----HDRKFD-SDVSSILSE  
 -----

Chrysis\_viridula RCAANGICCSQET-CHMDSTCRISDVDT-----RDRKEEGVDVAAVLSD  
 Trachymyrmex\_septentrionalis RCASNGICCSQAS-CHMDTSCKISDVG-----NDRKLD-DNVNVILPG  
 Trachymyrmex\_cornetzi RCASNGICCSQAS-CHMDTSCKISDVG-----NDRKLD-DNVNVILPG  
 Atta\_cephalotes RCASNGICCSQAF-CHMDTSCKISDVG-----NDRKLD-DNVNVILPG  
 Trachymyrmex\_zeteki RCASNGICCSQAS-CHMDTSCKISDVG-----NDRKLD-DNVNVILPG  
 Acromyrmex\_echinator RCASDGI CCSQAS-CHMDTSCKISDVG-----NDRNLD-DNVNVILPG  
 Vollenhovia\_emoryi RCASSGICCSQES-CHMDTSCRIPDVVG-----NDKKLD-ANLNVILPG  
 Solenopsis\_invicta RCASNGICCSQES-CHMDTSCRISDVVG-----NDRKLD-ANLNVIFPD  
 Monomorium\_sp RCALNGICCSQES-CHMDTSCKISNVVG-----NNQKLD-DNLNVILSG  
 Wasmannia\_auropunctata RCASNGICCSQES-CNMDTSCKISDVG-----NDRKLD-ANLNVILSG  
 Harpegnathos\_saltator RCATNGICCSQDS-CHMDTSCRISDVVS-----NDRKMD-ADLSAILSS  
 Dinoponera\_quadriceps RCATNGICCSQES-CHMDTSCRISDVVG-----NDRKMD-TDLNVILSS  
 Cerapachys\_biroi RCATNGICCSQES-CHMDTSCRISDVG-----NDRKID-ADLNVMFPG  
 Linepithema\_humile RCATNGICCSQES-CHMDTSCRISNVD-----NNRKID-TDLNMIIPG  
 Pogonomyrmex\_barbatus RCASNGICCSQES-CYIDSSCRISNAV-----SDRKLD-ADLNVLPG  
 Camponotus\_floridanus RCAANGICCSQ-----  
 Pseudomasaris\_vespoides RCAANGICCSQES-CFIDNTRIPDIMA-----KDQKID-SDINMIFGE  
 Chyphotes\_mellipes RCAAAGICCSQES-CHIDASCRLETSDDGGGNGHERRFSDLSAILSEN  
 Athalia\_roseae RCAAAGICCSQES-CHADSCKVTDNFAN-NQGISFDLNTLFSNTSLN  
 Neodiprion\_lecontei RCAANGICCSQES-CYVDPNCKVRSDI IQMSKQVTSFDMDKIYSESNLN  
 Cephus\_cinctus RCAANGICCTQES-CYVDDTCRITDDVNDHRIIS--ELNGFLNEGNVLA  
 Polistes\_canadensis RCGAGGICCSQDS-CFIDPSCRFTVDSS-FRRSIDSCLKAIASEIILK  
 Polistes\_metricus RCGAGGICCSQDS-CFIDPSCRFTVDSP-FRRSIDSCLKAIASEIILK  
 Polistes\_dominula RCGAAGICCSQNS-CFIDPSCRFPFDDWPGRQKIDSCLKAIASEIILKEE  
 Mischoctytarus\_flavitaris RCAAIGICCSQES-CFLDPICRSLDNLVGRKFNT-----  
 Corydalus\_cornutus RCAAADGICCTQES-CHTDSSCAFDEERHRSNGRPAIPIESIFSVLSPY  
 Onthophagus\_taurus RCASEGICCTQGN-F-----  
 Aleochara\_curtula RCAAEGICCSQ-----  
 Nicrophorus\_vespilloides RCAAEGLCSSQGI-I IQLLLLLHLRLTHRLHHPMMI-----  
 Oryctes\_borbonicus RCATDGVCCSQGI-RYIDS-----  
 Anoplophora\_glabripennis RCAAIDGICCSQGN-NSGFLKLLKNNLFLSLQILVMSTNNARWKTGAGFFP  
 Leptinotarsa\_decemlineata1 RCAAEEKICCTQGI-WTFFLVSN-----  
 Leptinotarsa\_decemlineata2 RCATENICCTQGI-FKIRSYT-----  
 Priacma\_serrata TMCQRGHMLHARL-LPHRQNYAHLTTNKQN-----  
 Gyrimus\_marinus -----  
 Dendroctonus\_ponderosae -----  
 Meloe\_violaceus RCATDGI CCNQDS-CHIDKTCISITTTIGFIENEKTRNFLETSPADLYNFI  
 Tribolium\_castaneum RCAFDPGICCSQDS-CHADKSCASD-----DKSPIDLYTLI  
 Hypothenemus\_hampeii RCATNGICCSQGK-RTVLVNSSSVYN-----  
 Agrilus\_planipennis RCATQGVCCNQGK-CFTSFYLLLNVLDISPYQGI IRRKVLLNKNLTMVGT  
 Arachnocampa\_luminosa RCATSNLCCNPEH-CLEDSTCVSEENDYSEYKEIDTKLLKALKRLISKK  
 Tetranychus\_urticae VCTSNGICCSNSDG-CFNDSTCENDK-----LSNMQRIFTSD  
 Scolopendra\_subspinipes1 KCAAADGLCCSSDQ-CKMEERC-----  
 Scolopendra\_subspinipes2 NCAVDGLCCNTSQ-CKRDERC-----  
 Strigamia\_maritima TCSADGFCSTDQ-CKADESCRGVHHTN-----NLQRVL  
 Limulus\_polyphemus YCAAAPGICCSAIQ-CAVDDECPTGVLDKG-----VAYKYD  
 Litopenaeus\_vannamei RCASSGVCCTEVK-CEFDINCVIEG-----VDRHRY  
 Homarus\_americanus RCAAAGLCCCTEMK-CEFDSSCTVEGREERVGKQ-----RAERQHL  
 Occasjapyx\_japonicus KCAAAVGICCTEDS--CTSDQTCRASPGKEAVAAVLPGRGSRPQLPSDLV  
 Catajapyx\_aquilonaris KCAAAMGLCCCTEAD-SCTSDSACRGAPSKEVVAASRGQR---PQQLPSDLV  
 Lithobius\_forficatus KCHLFP-----  
 Meinertellus\_cundinamarcensis KCAAQGVCCSETA-CALDSMCLDSWPS-----RNVVQ-----MNSGLA  
 Machilis\_hrabei VCAAQGVCCSETS-CALDASCMDSWSP-----RQLVP-----VNGLS  
 Tricholepidion\_gertschi RCAAATGVCCTEES-CSIDPSCHVTPOETILTPVSRQMYP-----INSAMN  
 Atelura\_formicarial RCAAANGVCCTEET-CTIDPSCRISNED--ISSSRQMFP-----ITNSVS  
 Atelura\_formicaria2 -----  
 Speleonectes\_cf\_tumulensis -----AATSAP  
 Anurida\_maritima QCTGDGICCSSET-CTHDENCWERSMT-----SGTGDSQE  
 Pogonognathellus\_sp QCG-----  
 Folsomia\_candida QCATLGVCCSSDT-CTIDNCHKKDEQQNVSGHSRSTVAMDGSHTKHEHAT  
 Sminthurus\_viridis QCGAEGICCSNET-CTMDETCHEASVTRES-----VAKLSGL  
 Ephemera\_danica LCAAAPGICCSQGK-----  
 Triops\_cancriformis -----  
 Eurylophella\_sp QCASQGICCLQDSCHADVCKHENYD-----  
 Ixodes\_scapularis KDSSCSGGVPTDQFGSAVDILEYGMSE-----  
 Ixodes\_ricinus -----  
 Ladona\_fulva RCASDGI CCNDGKRN-----  
 Menopon\_gallinae RCKAKFICCSRDQCVMDLSCKSMPPAKYRDVNE-----  
 Pseudomallada\_prasinus -----KISTDSIKP-----  
 Liposcelis\_bostrychophila LCVARNVCCPKNLCRIDDTCKTIPYVDLGYRLGTSIDLNRLSSYSVDYPL  
 Diaphorina\_citri ACIDLNTLKC CNMYA IKVPTEVKLQLHQ-----  
 Apachyus\_sp -----  
 Pachyphylla\_venusta -----  
 Cryptocercus\_wrighti -----  
 Orussus\_abietinus ELFKRRRCKSKFINDTSIPSPNILI-----

Calanus\_finmarchicus1  
 Calanus\_finmarchicus3  
 Daphnia\_pulex  
 Daphnia\_magna  
 Lepeophtheirus\_salmonis  
 Caligus\_rogercresseyi  
 Dermatophagoides\_farina  
 Sarcoptes\_scabiei  
 Symphylella\_vulgaris  
 Tigriopus\_californicus  
 Metaseiulus\_occidentalis  
 Varroa\_destructor  
 Gryllotalpa\_sp  
 Teleogryllus\_commodus  
 Haploembia\_palau  
 Aposthonia\_japonica  
 Zootermopsis\_nevadensis  
 Blattella\_germanica  
 Galloisiana\_yuasai  
 Locusta\_migratoria\_manilensis  
 Nilaparvata\_lugens  
 Halyomorpha\_halys  
 Homalodisca\_vitripennis  
 Gynaikothrips\_ficorum  
 Cotesia\_vestalis  
 Microplitis\_demolitor  
 Fopius\_arisanus  
 Diachasma\_alloeum  
 Telenomus\_podisi  
 Nasonia\_giraulti  
 Nasonia\_vitripennis  
 Copidosoma\_floridanum  
 Trichogramma\_pretiosum  
 Brachycistis\_timberlakei  
 Crioscobia\_alcione  
 Chrysis\_viridula  
 Trachymyrmex\_septentrionalis  
 Trachymyrmex\_cornetzi  
 Atta\_cephalotes  
 Trachymyrmex\_zeteki  
 Acromyrmex\_echinatior  
 Vollenhovia\_emeryi  
 Solenopsis\_invicta  
 Monomorium\_sp  
 Wasmannia\_auropunctata  
 Harpegnathos\_saltator  
 Dinoponera\_quadriceps  
 Cerapachys\_biroi  
 Linepithema\_humile  
 Pogonomyrmex\_barbatus  
 Camponotus\_floridanus  
 Pseudomasaris\_vespoides  
 Chyphotes\_mellipes  
 Athalia\_rosae  
 Neodiprion\_lecontei  
 Cephus\_cinctus  
 Polistes\_canadensis  
 Polistes\_metricus  
 Polistes\_dominula  
 Mischocyttarus\_flavitaris  
 Corydalus\_cornutus  
 Onthophagus\_taurus  
 Aleochara\_curtula  
 Nicrophorus\_vespilloides  
 Oryctes\_borbonicus  
 Anoplophora\_glabripennis  
 Leptinotarsa\_decemlineata1  
 Leptinotarsa\_decemlineata2  
 Priacma\_serrata  
 Gyrinus\_marinus  
 Dendroctonus\_ponderosae  
 Meloe\_violaceus  
 Tribolium\_castaneum  
 Hypothenemus\_hampe  
 Agrilus\_planipennis  
 Arachnocampa\_luminosa

201  
 NQRCNWMDLYLAR-----  
 -----  
 PQDDL-----  
 KQNFAC-----  
 RRQAYLGNQVPRLQQLNINDLEQ-----  
 RELHSL-----  
 -----  
 TQ-----  
 VEKAMITIPQPNKAYQEALNMQIIPKSNLSALNKYLSRHGDVK-----  
 -----  
 -----  
 ALAKNQDHNPNQNNVE-----  
 -----  
 -----  
 SYQQENPGLGLSE-----  
 AYQQENP-----  
 LGSYEPDHQAYRLPSNVERD-----  
 -----  
 -----  
 -----  
 NDWHS-----  
 DQMIN-----  
 DQLIN-----  
 E-----  
 EQ-----  
 -----  
 AGTNEHIL-----  
 AGTNEHIL-----  
 AGANERILR-----  
 SGRNEHIL-----  
 SEISNEII-----  
 -----  
 NELSADSVQ-----  
 NEVSNEILQ-----  
 NEVSNEILQ-----  
 -EVSNEILQ-----  
 NEVSNEILQ-----  
 NEVSNEILQ-----  
 SEVSSEILQ-----  
 NEVSSDILQ-----  
 NEISSEIPQ-----  
 NEVSSDLF-----  
 NEASHEIIQ-----  
 NEVSHEILQ-----  
 NEASSETFP-----  
 NEVSSEILQ-----  
 NEVSNEMFQ-----  
 -----  
 NEISNELTQ-----  
 VGTSVEMVR-----  
 DQ-----  
 DE-----  
 DHNQ-----  
 EEAK-----  
 EEAK-----  
 AM-----  
 -----  
 RS-----  
 -----  
 -----  
 -----  
 ITLWEWICII-----  
 -----  
 -----  
 -----  
 -----  
 NYQSELNSE-----  
 NYQAEALAGDK-----  
 -----  
 -----  
 LNIE-----  
 RQKNENYKSHNIDNYQS-----



|                               |                                                        |
|-------------------------------|--------------------------------------------------------|
| Tetranychus_urticae           | -----                                                  |
| Scolopendra_subspinipes1      | -----                                                  |
| Scolopendra_subspinipes2      | -----                                                  |
| Strigamia_maritima            | DGEIDLNDVMGPQR-----                                    |
| Limulus_polyphemus            | HLRFVLLPWNMNGKLPD-----                                 |
| Litopenaeus_vannamei          | SLLDRTLTEAQWRI-----                                    |
| Homarus_americanus            | TFLSSLPEDQWNL-----                                     |
| Occasjapyx_japonicus          | SFLEEVVDNMAPASGSEV-----                                |
| Catajapyx_aquilonaris         | SFLEEVVENIAPASAPEV-----                                |
| Lithobius_forficatus          | -----                                                  |
| Meinertellus_cundinamarcensis | SVLENMLEEVPSENGDDKK-----                               |
| Machilis_hrabei               | SVLENMLEDIPMESGDDRR-----                               |
| Tricholepidion_gertschi       | NYLEEAVDALPSHVILENRR-----                              |
| Atelura_formicaria1           | MYLEELNDDLPARVGSDDR-----                               |
| Atelura_formicaria2           | -----                                                  |
| Speleonectes_cf_tumulensis    | KNRRLPVRE---LLPCL-----                                 |
| Anurida_maritima              | FNQDLPLREDRFLIPLPATHEKFRSFPISQIRVGRKKNQFEDLRNHLH-----  |
| Pogonognathellus_sp           | -----                                                  |
| Folsomia_candida              | TMFQNLDRWIPRRFGLGRPTGQRKHVRIGVKPDAQILAPENSLMDRLVI----- |
| Sminthurus_viridis            | YHHRYPDLVVFRFVDGQHSQHRLPARLPLPTQSSSSSNDY-----          |
| Ephemera_danica               | -----                                                  |
| Triops_cancriformis           | -----                                                  |
| Eurylophella_sp               | -----                                                  |
| Ixodes_scapularis             | -----                                                  |
| Ixodes_ricinus                | -----                                                  |
| Ladona_fulva                  | -----                                                  |
| Menopon_gallinae              | -----                                                  |
| Pseudomallada_prasinus        | -----                                                  |
| Liposcelis_bostrychophila     | ELPSNMPIGSTSLDEVWGSKEDSIVPNYNFKIEAS-----               |
| Diaphorina_citri              | -----                                                  |
| Apachyus_sp                   | -----                                                  |
| Pachyphylla_venusta           | -----                                                  |
| Cryptocercus_wrighti          | -----                                                  |
| Orussus_abietinus             | -----                                                  |

251

|                               |       |
|-------------------------------|-------|
| Calanus_finmarchicus1         | ----- |
| Calanus_finmarchicus3         | ----- |
| Daphnia_pulex                 | ----- |
| Daphnia_magna                 | ----- |
| Lepeophtheirus_salmonis       | ----- |
| Caligus_rogercresseyi         | ----- |
| Dermatophagoides_farina       | ----- |
| Sarcoptes_scabiei             | ----- |
| Symphylella_vulgaris          | ----- |
| Tigriopus_californicus        | ----- |
| Metaseiulus_occidentalis      | ----- |
| Varroa_destructor             | ----- |
| Grylotalpa_sp                 | ----- |
| Teleogryllus_commodus         | ----- |
| Haploembia_palau              | ----- |
| Aposthonia_japonica           | ----- |
| Zootermopsis_nevadensis       | ----- |
| Blattella_germanica           | ----- |
| Galloisiana_yuasai            | ----- |
| Locusta_migratoria_manilensis | ----- |
| Nilaparvata_lugens            | ----- |
| Halyomorpha_halys             | ----- |
| Homalodisca_vitripennis       | ----- |
| Gynaikothrips_ficorum         | ----- |
| Cotesia_vestalis              | ----- |
| Microplitis_demolitor         | ----- |
| Fopius_arisanus               | ----- |
| Diachasma_alloeum             | ----- |
| Telenomus_podisi              | ----- |
| Nasonia_giraulti              | ----- |
| Nasonia_vitripennis           | ----- |
| Copidosoma_floridanum         | ----- |
| Trichogramma_pretiosum        | ----- |
| Brachycistis_timberlakei      | ----- |
| Crioscolia_alcione            | ----- |
| Chrysis_viridula              | ----- |
| Trachymyrmex_septentrionalis  | ----- |
| Trachymyrmex_cornetzi         | ----- |
| Atta_cephalotes               | ----- |
| Trachymyrmex_zeteki           | ----- |
| Acromyrmex_echinatior         | ----- |

|                               |                     |
|-------------------------------|---------------------|
| Vollenhovia_emeryi            | -----               |
| Solenopsis_invicta            | -----               |
| Monomorium_sp                 | -----               |
| Wasmannia_auropunctata        | -----               |
| Harpegnathos_saltator         | -----               |
| Dinoponera_quadriceps         | -----               |
| Cerapachys_biroi              | -----               |
| Linepithema_humile            | -----               |
| Pogonomyrmex_barbatus         | -----               |
| Camponotus_floridanus         | -----               |
| Pseudomasaris_vespoides       | -----               |
| Chyphotes_mellipes            | -----               |
| Athalia_rosae                 | -----               |
| Neodiprion_lecontei           | -----               |
| Cephus_cinctus                | -----               |
| Polistes-c_canadensis         | -----               |
| Polistes-m_metricus           | -----               |
| Polistes_dominula             | -----               |
| Mischocyttarus_flavitaris     | -----               |
| Corydalus_cornutus            | -----               |
| Onthophagus_taurus            | -----               |
| Aleochara_curtula             | -----               |
| Nicrophorus_vespilloides      | -----               |
| Oryctes_borbonicus            | -----               |
| Anoplophora_glabripennis      | -----               |
| Leptinotarsa_decemlineata1    | -----               |
| Leptinotarsa_decemlineata2    | -----               |
| Priacma_serrata               | -----               |
| Gyrinus_marinus               | -----               |
| Dendroctonus_ponderosae       | -----               |
| Meloe_violaceus               | -----               |
| Tribolium_castaneum           | -----               |
| Hypothenemus_hampeii          | -----               |
| Agrilus_planipennis           | -----               |
| Arachnocampa_luminosa         | -----               |
| Tetranychus_urticae           | -----               |
| Scolopendra_subspinipes1      | -----               |
| Scolopendra_subspinipes2      | -----               |
| Strigamia_maritima            | -----               |
| Limulus_polyphemus            | -----               |
| Litopenaeus_vannamei          | -----               |
| Homarus_americanus            | -----               |
| Occasjapyx_japonicus          | -----               |
| Catajapyx_aquilonaris         | -----               |
| Lithobius_forficatus          | -----               |
| Meinertellus_cundinamarcensis | -----               |
| Machilis_hrabei               | -----               |
| Tricholepidion_gertschi       | -----               |
| Atelura_formicaria1           | -----               |
| Atelura_formicaria2           | -----               |
| Speleonectes_cf_tumulensis    | -----               |
| Anurida_maritima              | RPQMDFQPPISSTESLYP- |
| Pogonognathellus_sp           | -----               |
| Folsomia_candida              | FPDTSGRISSEY-----   |
| Sminthurus_viridis            | -----               |
| Ephemera_danica               | -----               |
| Triops_cancriformis           | -----               |
| Eurylophella_sp               | -----               |
| Ixodes_scapularis             | -----               |
| Ixodes_ricinus                | -----               |
| Ladona_fulva                  | -----               |
| Menopon_gallinae              | -----               |
| Pseudomallada_prasinus        | -----               |
| Liposcelis_bostrychophila     | -----               |
| Diaphorina_citri              | -----               |
| Apachyus_sp                   | -----               |
| Pachypsylla_venusta           | -----               |
| Cryptocercus_wrighti          | -----               |
| Orussus_abietinus             | -----               |

(B)

|                                |                                                          |          |
|--------------------------------|----------------------------------------------------------|----------|
|                                | 1                                                        | 50       |
| Tenthredo_koehleri             | -----CPACGPD-RQGQCFGPKI                                  | CCGPS--- |
| Tetramorium_bicarinaratum      | -----GDIAPLGTIVRECPSCGPN-HLGQCFGPHI                      | CCGPS--- |
| Ceratosolen_solmsi_marchali    | MTNYPRGGKR-----AMFANPTFLLD-KIAREFGPHI                    | CCGPT--- |
| Lepicerus_sp                   | -VNCPRGGKRGELPFLSIQGLVKECQSCGPG-HQGQCFGPNI               | CCGTN--- |
| Inocellia_crassicornis         | -----                                                    | -----    |
| Osmylus_fulvicephalus          | -----SVYFFGKSMYTLQCIISCGPQ-RSGQCFGPAI                    | CCGP---  |
| Aethina_tumida                 | -----CVSCGPG-HTGQCFGPSI                                  | CCGP---  |
| Pogonus_chalceus               | -----CIACGPG-HSGQCFGPNI                                  | CCGP---  |
| Dastarcus_helophoroides        | -----QCIPCGPA-RTGQCFGPNI                                 | CCGP---  |
| Diabrotica_virgifera_virgifera | -----GQCFGPNI                                            | CCGP---  |
| Prorhinotermes_simplex         | -----QCARC GPA-KLEHCYGP                                  | CCGPQ--- |
| Periplaneta_americana          | -----                                                    | -----    |
| Ceuthophilus_sp                | -----CARCGPA-KLGHCYGP                                    | CCAPQ--- |
| Blaberus_atropos               | ---IFFLCNVDIKIMHLKYLDTKQCARC GPA-KLGHCYGP                | CCGPQ--- |
| Medauroidea_extradentata       | -----VTHFNSSPGFKHKKCPRCGPA-KLGHCYGDNI                    | CCGVE--- |
| Oncopeltus_fasciatus           | -----FLLLFKCKIYFFQQAFFRCEPD-REGRLGRAI                    | CCGPK--- |
| Scylla_paramamosain            | -----GRCVGPDI                                            | CCGAR--- |
| Campodea_augens                | -----GRCFSPDL                                            | CCGPE--- |
| Baetis_sp                      | -----                                                    | -----    |
| Isonychia_bicolor              | -----ACLQCARC GF-LAGRCFGPRI                              | CCDTR--- |
| Tetradontophora_bielanensis    | -----IPEQHNTNKVRE CASCGPVGQGRCYGPET                      | CCGPN--- |
| Frankliniella_occidentalis     | -----QCTPCGPG-GEGLCVGPGI                                 | CCSPV--- |
| Calanus_finmarchicus2          | -----PVSGKKRSLHVGEEQVRD GELT C P S N P A G L C Y S P L C | CCVQGGCY |

|                                |                                                                   |     |
|--------------------------------|-------------------------------------------------------------------|-----|
|                                | 51                                                                | 100 |
| Tenthredo_koehleri             | --IGCFID-----TAETHKCRKESLYS--RPCTAGFA-                            |     |
| Tetramorium_bicarinaratum      | --IGCFIG-----TSETYRCRKESLYT--RPCVAGYA-                            |     |
| Ceratosolen_solmsi_marchali    | --MGCLLG-----TPEAHCQKESLYS--QPYVAGFA-                             |     |
| Lepicerus_sp                   | --IGCFIG-----TPETYKCKMESLYS--RPCIAGFS-                            |     |
| Inocellia_crassicornis         | --FGCLVG-----TPETIRCERDGA FQEREPCIAGRS-                           |     |
| Osmylus_fulvicephalus          | --FGCLIA-----TAETTRCERDGA FHEREPICAGKS-                           |     |
| Aethina_tumida                 | --FGCLMG-----TSETIRCQREGFFQEREPCIAGSS-                            |     |
| Pogonus_chalceus               | --FGCLIG-----TSETLKCQREGFFQEP EPCIAGNG-                           |     |
| Dastarcus_helophoroides        | --FGCLVG-----TPDTIKCQREGFFHERDPC IAGNS-                           |     |
| Diabrotica_virgifera_virgifera | --FGCLLG-----SPETVRCQREGSFHEREPIC IAGSG-                          |     |
| Prorhinotermes_simplex         | --IGCLVA-----TPETARCLTEAASP--VPCIAPTGV                            |     |
| Periplaneta_americana          | ---GCLIA-----TPDTARCLSEASP--VPCIAPTGA                             |     |
| Ceuthophilus_sp                | --FGCLIG-----TPDTPCQREDQSP--IPCIGTG--                             |     |
| Blaberus_atropos               | --IGCLIA-----TPDTARCLNEASP--IPCTA--                               |     |
| Medauroidea_extradentata       | --IGCLLA-----TPDQVCQRESMTP--DPCVGP I G-                           |     |
| Oncopeltus_fasciatus           | --IGCLVG-----TPAILSQCS EQPPE--LPYSKPYS-                           |     |
| Scylla_paramamosain            | --IGCF LG-----SRETRMCR TENMVPITCYN S D L K P C-                   |     |
| Campodea_augens                | --IGCYFR-----TKESSVCKSENLFVPVPCEN-PAKSC                           |     |
| Baetis_sp                      | -----VAPAATA-----SNLALLPCVAESLFP EPCSNGPTVRC                      |     |
| Isonychia_bicolor              | --LGMVGSAMEP-----LQAE L L P C L A E S I F P A A C H N - H A A T C |     |
| Tetradontophora_bielanensis    | --FGCMVG-----TPETHCLIEDRIN--                                      |     |
| Frankliniella_occidentalis     | --FGCVLTSRGGCGRGAVFAPRCSPSSAALAAASAAAVPLDAPCGADLTP                |     |
| Calanus_finmarchicus2          | ADGGCLPG-----LTERGEEQIKTRESVSKRGLRFLY G                           |     |

|                                |                                                                                      |     |
|--------------------------------|--------------------------------------------------------------------------------------|-----|
|                                | 101                                                                                  | 150 |
| Tenthredo_koehleri             | --MCRGNTGRCAADGICCSQESQVDPNCKITDDSITS-----                                           |     |
| Tetramorium_bicarinaratum      | --MCRGNTARCASNGICCSQDSCYVDASCNSD GVRNDQKFDANLNEVLP                                   |     |
| Ceratosolen_solmsi_marchali    | --MCRGNSGRCAANGIMNIPKNHVSLIHHAN-----                                                 |     |
| Lepicerus_sp                   | --MCRDNNRC-----                                                                      |     |
| Inocellia_crassicornis         | --NCRGDTGRCAADGICCTQGNYE-----                                                        |     |
| Osmylus_fulvicephalus          | --SCRGDTGRCAF D G I C C T Q G M C T V Q L K L G L K S L P N A I R L I -----          |     |
| Aethina_tumida                 | --FCRKNTGRCAIDGICCNQESCHVDKHC SLDEKKSSENLMGMEL-----                                  |     |
| Pogonus_chalceus               | --YCRKNTGRCAADGVCC T Q-----                                                          |     |
| Dastarcus_helophoroides        | --SCRKNTGRCAADGICCS-----                                                             |     |
| Diabrotica_virgifera_virgifera | --FCRKNTGRCATDNI C C D Q D S C Y T D R Q C S S D E K L K A E A L S G L D I Y N F L N |     |
| Prorhinotermes_simplex         | QCGEGKLAGRCTANGVCC THGKQSS T M Y C L Y V F N Q A Q V Q L -----                       |     |
| Periplaneta_americana          | QCGEGKSAGRCTANGVCC THGEASQNIYNLQYSFITSTTFLLPYLLEILK                                  |     |
| Ceuthophilus_sp                | SGPRCQE QHCTANEVCC T Q E S C H I D P T C R L T L P A E G G L P D G P D A T T D L S   |     |
| Blaberus_atropos               | -----                                                                                |     |
| Medauroidea_extradentata       | -GAPCGNSGKCAAPGVCC T P D S C T I D P T C H Q T L S Q E M A S L Y L Y N A G N A R G   |     |
| Oncopeltus_fasciatus           | -----IGVCLSDGGLLFIG-----                                                             |     |
| Scylla_paramamosain            | G---RMQEGRCGAPGICCTENKCEMNDDCVAEDTQGE-----                                           |     |
| Campodea_augens                | G---TDRNGK CAGQGLCC TEDSCTVDSSCHVILKDLPPPPAAVAPPSPW                                  |     |
| Baetis_sp                      | G---RGAKGVCAAPGVCC F H N S C E T D A S C A K M R R -----                             |     |
| Isonychia_bicolor              | G---RMA T G Q C A A T G L C C Y Q D S C H P D M T C R G R S E -----                  |     |
| Tetradontophora_bielanensis    | -----SVCHNPGIPCTVNV D N G N I N G F C A T G -----                                    |     |
| Frankliniella_occidentalis     | D---GSAPGRCAAQGVCC TH-----                                                           |     |
| Calanus_finmarchicus2          | MAPSQMNLFGQEGMAIPCIGPYCNGKGARSHGKQKQRKRKQSQEHVNRDQ                                   |     |

151

|                                |                                  |
|--------------------------------|----------------------------------|
| Tenthredo_koehleri             | -----                            |
| Tetramorium_bicarinatum        | GNFESREIM-----                   |
| Ceratosolen_solmsi_marchali    | -----                            |
| Lepicerus_sp                   | -----                            |
| Inocellia_crassicornis         | -----                            |
| Osmylus_fulvicephalus          | -----                            |
| Aethina_tumida                 | -----                            |
| Pogonus_chalceus               | -----                            |
| Dastarcus_helophoroides        | -----                            |
| Diabrotica_virgifera_virgifera | TY-----                          |
| Prorhinotermes_simplex         | -----                            |
| Periplaneta_americana          | YISQ-----                        |
| Ceuthophilus_sp                | DRNLVYSLFNAISTYQ-----            |
| Blaberus_atropos               | -----                            |
| Medauroidea_extradentata       | VSQISDVDDK-----                  |
| Oncopeltus_fasciatus           | -----                            |
| Scylla_paramamosain            | -----VEESQRGGRPRDLLAAARDRWEEQ--  |
| Campodea_augens                | LKYPSVFRVLQQQQPNTDLSSATGALWDDMLE |
| Baetis_sp                      | -----VNAIARESNAFA-----           |
| Isonychia_bicolor              | -----                            |
| Tetradontophora_bielanensis    | -----                            |
| Frankliniella_occidentalis     | -----                            |
| Calanus_finmarchicus2          | ALLGSSNYDSAVSDDQFLKHNCWMDLYLAR-- |

**Supplementary Figure S2. Alignment of multiple copies of inotocin precursors and receptors.** Relevant parts of the sequences (inotocin peptides and transmembrane domain; TM) are highlighted in yellow. Transmembrane domains were assigned according to the human neuropeptide S receptor (GeneBank: NP\_997055)<sup>1</sup> after alignment with the receptors. (A) Inotocin precursors and (B) inotocin receptors. Multiple copies of precursors were only found in 4 species; multiple copies of receptors were only found in eight species.

**(A)**

**Alignment of 2 inotocin precursor sequences of *Scolopendra subspinipes*:**  
 mature peptide  
 Scolopendra\_subspinipes1 -----HWLLFFYVIGMTSSCFITNCPE--GKRSLGEHKRTLROCTACGPGSQGRCFGP  
 Scolopendra\_subspinipes2 MRSSTCHWILYLSLVGLVSAFYIINCIDNDGRKRSIDHQKKAIRQCMSCGPGMKGRCFGP  
 \*\*::: :\*: :\*: :\*: :\* \* \* \* \* : :\*: :\*: :\*: :\*: :\* \* \* \* \*  
 Scolopendra\_subspinipes1 DLCCGEFFGCVLKTRESAICRFENLSPICDNDVLSGPDGAKAADGLCCSSDQKMEE  
 Scolopendra\_subspinipes2 DLCCIESFGCFQTQTPESAVCHLENLSPVPCDNDTPSCGL-GANCAVDGLCCNTSQCKRDE  
 \* \* \* \* \* : \* \* \* \* \* : \* \* \* \* \* : \* \* \* \* \* : \* \* \* \* \* : \* \* \* \* \* : \* \* \* \* \* : \* \* \* \* \*  
 Scolopendra\_subspinipes1 RCR  
 Scolopendra\_subspinipes2 RC-  
 \*\*

**Alignment of 3 inotocin precursor sequences of *Calanus finmarchicus*:**  
 mature peptide  
 Calanus\_finmarchicus2 -----PVSQKRLSHVG---EEQVRDG  
 Calanus\_finmarchicus1 MITSWKILDPRIRRSWFLIILLAQTMSASHGCFISNCPVSGKRSVGEQMVFSQAREE  
 Calanus\_finmarchicus3 MITSLKILDPSIRRSWFLMILLAHTIPDSHGCFISNCPVSGKRSVGEQVLSFQAREE  
 \* \* \* \* \* : : \* \* \* \* \* : \* \* \* \* \* : \* \* \* \* \* : \* \* \* \* \* : \* \* \* \* \*  
 Calanus\_finmarchicus2 ELTCPSPNAGLCYSPGLCCVQGGCYADGGCLPGLTERGEEQIKRESVSKRGLRFLYGMA  
 Calanus\_finmarchicus1 VLACPSNPAGLCYSPGLCCVQGGCYADKGLPQMEESRENVEP--RLNKRDLRFLYGWA  
 Calanus\_finmarchicus3 VLACPSNPAGLCYSPGLCCIQAACYADM-----  
 \* : \* \* \* \* \* : \* \* \* \* \* : \* \* \* \* \* : \* \* \* \* \* : \* \* \* \* \* : \* \* \* \* \* : \* \* \* \* \*  
 Calanus\_finmarchicus2 PSQMNLFQGEAIPICIGPYCNGK GARSHGKQKQKRKQSQEHVNRDQALLGSSNYDSAV  
 Calanus\_finmarchicus1 PAHEKMFQGTGF SIPCIGPYCNGNEKMI-----MRKEKQSQEKSSDDKVLGDSSNYDSL  
 Calanus\_finmarchicus3 -----  
 Calanus\_finmarchicus2 SDDQFLKHNCDWMDLYLAR  
 Calanus\_finmarchicus1 YNENLSNQR CNWMDLYLAR  
 Calanus\_finmarchicus3 -----

**Alignment of 2 inotocin precursor sequences of *Atelura formicaria*:**  
 mature peptide  
 Atelura\_formicaria1 -----ACFITNCPPGKRSMGQMLHVNKQCTSCGPARTGRCYG  
 Atelura\_formicaria2 SLSKGILSVTIFFLAVISVTTACFITNCPPGKRSMGQMLHANKQCTSCGPARGRCYG  
 \* \* \* \* \* : \* \* \* \* \* : \* \* \* \* \* : \* \* \* \* \* : \* \* \* \* \* : \* \* \* \* \* : \* \* \* \* \*  
 Atelura\_formicaria1 PAICCGPRFGCLVGRDITAVCQTE NFTPVPVCGNRGPSCGESGRCAANGVCCTEETCTIDP  
 Atelura\_formicaria2 PAICCGPRFGCLVGRDITAVCQ-----  
 \* \* \* \* \* : \* \* \* \* \* : \* \* \* \* \* : \* \* \* \* \* : \* \* \* \* \* : \* \* \* \* \* : \* \* \* \* \*  
 Atelura\_formicaria1 SCRISNEDISSSRQMPFITNSVSMYLEELNDDLPARVGSDDR  
 Atelura\_formicaria2 -----

**Alignment of 2 inotocin precursor sequences of *Leptinotarsa decemlineata*:**  
 mature peptide  
 Leptinotarsa\_decemlineata1 MVRSVPLTIIYLFIFVMYVESCLITNCPGGKRGGEFSTSESNIKTIVSINLNNYKHILQC  
 Leptinotarsa\_decemlineata2 MSKTVSLFTLFLSVFVIFVESCLITNCPIGGKRSGKFSLTESNI-----KQC  
 \* : \* \* \* : \* \* \* \* : \* \* \* \* \* : \* \* \* \* \* : \* \* \* \* \* : \* \* \* \* \* : \* \* \* \* \*  
 Leptinotarsa\_decemlineata1 ISCGPGHTGKCFGNICCGPFGCLLGSPE TERCHKEGLFQETEPICIAGFSTCRKNTGRCA  
 Leptinotarsa\_decemlineata2 ISCGPGHTGQCFGNICCGPFGCLMGSHE TFGQRGG-FHESEPCIAGFSSCRKNTGRCA  
 \* \* \* \* \* : \* \* \* \* \* : \* \* \* \* \* : \* \* \* \* \* : \* \* \* \* \* : \* \* \* \* \* : \* \* \* \* \*  
 Leptinotarsa\_decemlineata1 AEKICCTQG IWTFFLVSN  
 Leptinotarsa\_decemlineata2 TENICCTQGIKIRSYT-  
 : \* : \* \* \* \* \* : : :

(B)

Alignment of 3 inotocin receptor sequences of *Limulus polyphemus*:

```

                                          TM1
Limulus_polyphemus3  MSSLKKEEQTELTNASFVNFSPIENITV-GDTQRDETIARIEVGVGLAIIFFLLTIGNTCV
Limulus_polyphemus1  MSTLDLPGETPEILNVFSFMNSSTLINNTKDKGIQRDETIARIEVGVGLASIFLLTILGNMCV
Limulus_polyphemus2  MSTLAKGETTGFNLNLSFVNLSTITNNTKADVQRDETVARIEVAVLATIFLLTIVIGNTIV
           :* : * ** : * * * * * : * : * : * : * : * : * : * : * : *

                                          TM2
Limulus_polyphemus3  LVALAVRRTNMTIMYYFLLHLCSLDLITAFFHVLPLQLAWDAARFYGGNVLCVVKYLQI
Limulus_polyphemus1  LVALAVRRIKMAIMYYFLLHLCSLDLITAFFNLPQLAWDVTYRFYGGNILCKVIRYLQI
Limulus_polyphemus2  LVALAVRRIKMTIMYYFLLHLCSLDLITAFFHVLPLQLAWDVTYRFYGGNVLCIVKYMQI
           ***** : * : * : * : * : * : * : * : * : * : * : * : *

                                          TM3
Limulus_polyphemus3  LGPYLSSYVLMVTAIDRYQAICFPLTRCTWTPRHSKLMIVGAWIISILCCSQAFIFSYQ
Limulus_polyphemus1  LGPYLSSYVLMVTAIDRYHAICFPLRNCVWTPRHSKLMIIAAWTISMLCCVPQVFIQSYQ
Limulus_polyphemus2  LGPYLSSYVLLVTAIDRYQAICFPLTSCVWTPRHSKLMIANAWIISILCCFPQIFIFSYQ
           ***** : * : * : * : * : * : * : * : * : * : * : * : *

                                          TM4

Limulus_polyphemus3  QVSSDPLVFDWGTFIQPWGEKVVYVLWYTISSQFFIPLLVIITFTYVNVTKTVWNNYLRKK
Limulus_polyphemus1  KVLIEPITFDCWGVFIQPWGEKVVYVLWYALSQFFIPLIVITFTCVIICKNVWYNFHLRGK
Limulus_polyphemus2  KVSDEDVTFDCWGVFIQPWGEKVVYVLWYAVSQFFIPLVIAFTYIICKSVWYNLQMRRO
           :* : * : * : * : * : * : * : * : * : * : * : * : * : * : *

                                          TM5

Limulus_polyphemus3  NF-----IHCRSVPDLSRAKVTITITIVVIACYIICSTPPFLAVQLWAYWSPYQNSP
Limulus_polyphemus1  NS-----SRSHSMRGLSRAKVTITVVVVIACYIICSTPPIVQLWAYWSPYQNTSP
Limulus_polyphemus2  ASNCEFTTVPRSHCMRGLSRAKVTITVVVITCYIICSTPPIIQLWAYWSPNAKNSS
           : : : * : * : * : * : * : * : * : * : * : * : * : * : *

                                          TM6

Limulus_polyphemus3  IWGPTVAIIMLLASLNSCVNPWIYLAFNHNLIITALKQLCCRSVLQDYMAQSTEATSNNN
Limulus_polyphemus1  IWGPTVAIIMLLASLNSCVNPWIYLAFNHNLVITALKHICCHERSQGYSPQVVENIN-N
Limulus_polyphemus2  IWGPTVAIIMLLASLNSCVNPWIYLAFNYNLVITALEVCCQTSKSFSSQVPENTDN-N
           ***** : * : * : * : * : * : * : * : * : * : * : * : *

Limulus_polyphemus3  NANSYPTENEVNSSYPLSFFIAQEEPVMLRNLKQKQ-----DEAETFS
Limulus_polyphemus1  TTSRSTQDNEICTSYPLSLRCGVHYTSSFRLLKKTITIGCRPCPNIQDLH---DEAETFS
Limulus_polyphemus2  TFSR----SERCSSYPLSVRTGSRHKFP--DGSTTRTRKRLCRELGSKNESTDVGENRG
           : . * : * : * : * : * : * : * : * : * : * : * : * : * : *

Limulus_polyphemus3  -----
Limulus_polyphemus1  A-----
Limulus_polyphemus2  SVTQTETTSEPGKRVTRDKDKTLIC

```

Alignment of 3 inotocin receptor sequences of *Ixodes scapularis*:

```

                                          TM1
Ixodes_scapularis2  ----- --QVEVAVLTFIFGFITVLGNTCV
Ixodes_scapularis1  MDV-PSNQKPEFAASVPTVLNFASTNLTAETREDES LALVELAVLTLIFAFITVMGNSTV
Ixodes_scapularis3  MDLVANQDQPAFSTSLPDSLDDVPVNETFWGTREDES LAQIELGVLTAIFTFVIGNTIV
           : * : * * * * * : * : * : * : * : * : * : * : * : *

                                          TM2
Ixodes_scapularis2  LVALAARRSKMTIMYYFLLHLCSLDLITAFLSVLPQLGWDATHFRFGGNLVCVAVKFGQL
Ixodes_scapularis1  LLALATRRSKMTIMYYFLLHLCSLDLITAFLLVLPQLGWDATHFRFGGNLACKAVKFGQL
Ixodes_scapularis3  LAALAAARRSKMIMYYFLLHLCSLDLITAFFTVLPQLGWDATHFRFGGNLACKTVKFGQL
           * : * : * : * : * : * : * : * : * : * : * : * : * : * : *

                                          TM3
Ixodes_scapularis2  LGPYLSSYVLVVTAVDRYQAICFPLSNCSWSPTECKLLIAGAWVAALVCCVPQVFIQSYQ
Ixodes_scapularis1  LGPYLSSYVLVVTAVDRYQAICFPLSNCSWTPTECKLLIAGAWVAALVCCVPQVFIQSYQ
Ixodes_scapularis3  LGPYLSSYVLVVTAADRYQAICFPLSNCSWTPTECKLLISAAWVAALVCCVPQVFIQSYQ
           ***** : * : * : * : * : * : * : * : * : * : * : * : *

                                          TM4

Ixodes_scapularis2  EVAPGVFDCWGTFAQPWGLEAYVTWYSVSVFFVPLAVLSFTYVCI CRSIWRNLYLKRKSS
Ixodes_scapularis1  EVSPEVFDWGTYVESWGLEAYVTWYGMSVFFVPLMLVLTFTYVCI CRSIWRNLYLKRKSS
Ixodes_scapularis3  EISPKVFDWGTYVEPWGLEAYVTWYGVSVFFVPLVLSFTYVCI CRSIWRNLYLKRKSS
           :* : * : * : * : * : * : * : * : * : * : * : * : * : * : *

                                          TM5

Ixodes_scapularis2  DA-----DHSVRGMSRAKVTITVVVIALYIVCS
Ixodes_scapularis1  DAESWKGERAYRFRGLAHNGTKQDSSVFPGRSHSVRGLSRAKVTITVVVIALYIVCS
Ixodes_scapularis3  DAESWKGSRAIRFKGTAQNGTKQDSSF-----TVKITVVVIALYIVCS
           * * * * * : * : * : * : * : * : * : * : * : * : * : * : *

                                          TM6
Ixodes_scapularis2  SPFICVQMMWYWSPDVDLADVWVINAIVTILMLLNS- - - - - NSCVNPNWYLFVFNRSLVH
Ixodes_scapularis1  SPFICVQMMWYWSPHVDMANPWISE-----
Ixodes_scapularis3  SPFICVQMMWYWSPDAD-----
           ***** : * : * : * : * : * : * : * : * : * : * : * : *

Ixodes_scapularis2  TLRHQICRCPDAKNVSSGIAGTGSCPSAVILADLTTQGTAEQSVLSYKSSPTDTSARLAT
Ixodes_scapularis1  -----
Ixodes_scapularis3  -----

```

Ixodes\_scapularis2 AVVGKRGATDVEEDLQCSLEKTS  
 Ixodes\_scapularis1 -----  
 Ixodes\_scapularis3 -----

Alignment of 2 inotocin receptor sequences of *Metaseiulus occidentalis*:

```

                                TM1                                TM2
Metaseiulus_occidentalis1  --MNSSAGNFGDARDETIAHVRITVLCFCLELFTLGGNLFVFLLVTRNRPKSVHQLHIYHF
Metaseiulus_occidentalis2  MEYNITDTDFVPQENNWLSVKCATLVIIFFLTLSSNLFVLHAVLLRNRQNRRPLSRVQLF
                                * : : * : : : * : : * : : : * : : * : : : * : : * : : : * : : *
                                TM2                                TM3
Metaseiulus_occidentalis1  MVHLSLADMLVGVFNILPQIVWEIYFRFRWGNIACKFVKFMQIFVLYLSTYTLVGLSLNS
Metaseiulus_occidentalis2  MLHLTVADILVALLNILPQLAWDLTIQFRGGAVLCKLVFAQVYVLYLSTYILTGMSLDF
                                * : : * : : * : : * : : * : : * : : * : : * : : * : : * : : *
                                ICL2                                TM4
Metaseiulus_occidentalis1  SLVVRSGSSST-----S-----SLWVILGAGWFLS
Metaseiulus_occidentalis2  LITRAIESQWQTASLRSRDHDQSSDKSPQSHKIKFNNHRCRVGYRKFAKLIVFAWFLA
                                : : * : * : : : * : : * : : * : : * : : * : : * : : * : : *
                                ECL2                                TM5
Metaseiulus_occidentalis1  ALLASPQVYIFSFKQLSN--GVYDCWGTFDPP-LTSVYVYFIAMALIVPALIMGACYS
Metaseiulus_occidentalis2  AALSIPQLLFFSYTRIHDHGSWYDCKANFSWHRFGQYITTYFVVLILGVPVVMMLFCYI
                                * * : : * : : * : : * : : * : : * : : * : : * : : * : : * : : *
                                ICL3                                TM6
Metaseiulus_occidentalis1  YLCRAS-----SKRLMSDAKLTIRMTMVMLVLVFLCW
Metaseiulus_occidentalis2  QICLIIVRIQRHMTKTTSAPANFGVNTAGFFESNRRITKAVMVMMTFTVVLCFIVCW
                                : * : : * : : * : : * : : * : : * : : * : : * : : * : : * : : *
                                TM7
Metaseiulus_occidentalis1  TPFCCAQLYL---VFGGEEASTFVTMCLMVPNLNSCANPWVLSFSTDLRRRLVNF-CSL
Metaseiulus_occidentalis2  SPYSIAELLLLAYKIAGGEHVSPPFMVFLLLASLNSAVNPWIYTAFTNSFACKSLRTLKPE
                                : * : * : * : * : : * : : * : : * : : * : : * : : * : : * : :
Metaseiulus_occidentalis1  IHLRGNRYGEESRKPCTRANAIVCEKPARQLRGYRIS
Metaseiulus_occidentalis2  VHLITV-----
                                : * :
  
```

Alignment of 2 inotocin receptor sequences of *Varroa destructor*:

```

                                TM1                                TM2
Varroa_destructor1  MAGNIVVLVVLQSPKSAHLSRIYYFLLHLSIADILVGIFNISPQLVWDIYFRFPLGNF
Varroa_destructor2  -----EARRSSSLRVQLFMMHLSIADILVALLNILPQLAWDITARFYGGAL
                                : : * : : * : : * : : * : : * : : * : : * : : * : : * : : *
                                TM3                                TM4
Varroa_destructor1  ACKIVKFLQVFLYLSTYVLAGMAVDYLAIRSGINRPVVVRTILSVSWLVAAVLASPQ
Varroa_destructor2  LCKFVKYAQVLVLYLSTYILTGMSLDLVSM-----
                                * : : * : : * : : * : : * : : * : : * : : * : : * : : * : :
                                TM5
Varroa_destructor1  LYIFSFQKLPNGAHDCWATFEPPITSFYVLFFFITAVLFIPVTLMALCYTYLSWIISKRS
Varroa_destructor2  -----
                                TM6                                TM7
Varroa_destructor1  LSHTLNPIMTMVMVIVFVLCWTFPCCAQLYLESTGQVPSIFITFLLVPNLNSCANFW
Varroa_destructor2  -----
Varroa_destructor1  VCLTFSTTLRRKLDALSFFGFCEHLSVYRSKNAITISILQYPPNRSKRQPRAYRGA
Varroa_destructor2  -----
  
```

Alignment of 2 inotocin receptor sequences of *Achipteria coleoptrata*:

```

                                TM1
Achipteria_coleoptrata2  MSSDSSDMSVENISQTIIFQIINDDNMTANTSLAVKRNELVLLEIGILLIFLLIFVFGN
Achipteria_coleoptrata1  -----EN-----ITEELKNNTVSDTRDEHLAIFEIATLSLLFVLILIFGN
                                * : : * : : * : : * : : * : : * : : * : : * : : * : : * : : *
                                TM1                                TM2                                TM3
Achipteria_coleoptrata2  SCVLIALQINKLKMNMYYFLQHSISDMITAFFNVLPQLAWEITHRFYGGNILCTIY
Achipteria_coleoptrata1  SCVLLLALLMKIKMNMYYFLLHLIIADYLVAFFNVLPQLIWDITYRFYGGNLLCKVIY
                                * : : * : : * : : * : : * : : * : : * : : * : : * : : * : : *
                                TM3                                TM4
Achipteria_coleoptrata2  LQIFGPYLSSYVLVMTAIDHYQAICNPLSNCKWTPGSLMITIAWIVTSFCCSPQIFIFF
Achipteria_coleoptrata1  LQILGPYLSSYVLVMTSIDHYQAICYPLTNCQWTPTSQLMITLAWIALLCCIPQVLIF
                                * : : * : : * : : * : : * : : * : : * : : * : : * : : * : : *
                                TM5
Achipteria_coleoptrata2  SYQQIPGTDAIYDCWGTFQKPWGEIYVTWYAVSVFIIPFIIVVTHYHICREIWLNLH
Achipteria_coleoptrata1  SYQQIPGTDIYDCWGTFPLQPYGEIYVTWYAVSFFFIIPFILLTATHVQICREIW----
                                * : : * : : * : : * : : * : : * : : * : : * : : * : : * : : *
                                TM6
Achipteria_coleoptrata2  KKRKSFKLNKNRVGKSYRFKSRGKLEVSVDKDFKEDFSPRTHSIHGLSRAINTVITTV
Achipteria_coleoptrata1  -----
                                TM6                                TM7
Achipteria_coleoptrata2  IILCYIMCSTPPICVQLWAYWVPTAQKSHIWNVKYTYNIYLMFFSIIDVTIAFKILYSE
Achipteria_coleoptrata1  -----
  
```

Alignment of 5 inotocin receptor sequences of *Platynothrus peltifer*:

```

                                TM1
Platynothrus_peltifer5    METVSDLITFSRREQEFDPELLNDSNNVKNSSFEIRDSRNESLAIEIESLLTFMFSILIG
Platynothrus_peltifer3    -----M-----TGNGSLTVKRDEWVLLLEIGILSLIFILIVFG
Platynothrus_peltifer1    MEEIGTTVTLEELEDKLPET-----IIANVTKDSRDEHLAVFEIATLGLIFLLIVFG
Platynothrus_peltifer2    ME-VSTAIS-EETDGIFFET-----SSIKPNITGRNENLALIEVGTLTGTFVLLIVFG
Platynothrus_peltifer4    MSNVIMSI--NNTTSVLYN-----ISGDKRDENLAIMEVSILALIFILIIIG
                                *****
                                TM1          TM2          TM3
Platynothrus_peltifer5    NIFVLTALIVRDSKMNMYFFLPHLCIADLITAFFNVLPQLIWDITYRFYGGNVLCRLIK
Platynothrus_peltifer3    NSCVLIALQVRKLKMNMYFFLLHLCIADLITAFFNVLPQLAWEITHRFYGGNFLCWTIK
Platynothrus_peltifer1    NSCVLIALIMRKLKMNMYFFLLHLCIADLITAFFNVLPQLAWDITYRFYGGNILCWTIK
Platynothrus_peltifer2    NCCVLLALALRRLKMTMYFFLLHLCISDLMTGFFTVLPQLAWDITYRFNGGNILCRAVK
Platynothrus_peltifer4    NLCVLILALAVRFKMTMYFFLLHLCISDIITGCFVTMPQLAWDITHRFNGGNILCLVK
                                *****
                                TM3          TM4
Platynothrus_peltifer5    YLQILGPYLSSYILVITTAIDRYQAICFPPLSNCSWTPKRSQLMISIAWVLSLIFCAPQLFI
Platynothrus_peltifer3    YLQILGPYLSSYVLVMTTAIDRYQAICYPLSNCAWTPSLSLMILMAMIVSLLCCAPQII
Platynothrus_peltifer1    YLQILGPYLSSYVLVMTSIDRYQAICYPLSNCAWTPKRSQLMISFAWIIALLCCIPQVII
Platynothrus_peltifer2    SMQILGPYLSSYVLVMTTAIDRYQAICFPPLSNCSWTPRRALMISCAWIIISIVCSLPQAFI
Platynothrus_peltifer4    CLQLFGPYLSSYVLVMTTAIDRYQAICFPPLTNCHWTSRKSLMITIAWIIISILCSAPQAFI
                                *****
                                TM5
Platynothrus_peltifer5    FSYQQIPGTLGNVYDCWGIFPPQYGERIYVTWYAITVFVIPCIIIILFAHVCICREICNNL
Platynothrus_peltifer3    FSYQEI-GS--QIFDCWGTFSQPYGERIYVTWYAVSVFIIPFILLTFTHVHCICREIWNL
Platynothrus_peltifer1    FSYQQIPGY--DIIDCWGTFFPQFGERIYVSWYAISFFFVPFILLTFTHVHCICREIWRNV
Platynothrus_peltifer2    FSYQVEPETN-HYDCWGTFFPQWGERIYVTWYAISVFFIPLVLTFTTHVICREIWNL
Platynothrus_peltifer4    FSYQEIPRTN-GVRDCWGTFFPQYGERIYVTWYAITVFFIPLIIIITYTYVICREIWNV
                                *****
                                ICL3
Platynothrus_peltifer5    HRKRESIEEIKNCIHYSFKRNKFS-TSSLKSTSLTSFSGPIKSPI-----TYSIRPSK
Platynothrus_peltifer3    HKRKSFKINRNKSSSSCNRNDKLDCDSVNSPETSE--HRSGTRLLVTVGKSYRFKGKG
Platynothrus_peltifer1    HQRRKSVKMEQNKIIQNDDS-DRVSSCS---TNDS--IARSTNLLVTVGRSYRFKGKG
Platynothrus_peltifer2    NLKRQTGRRETQTINQIDSNSY-----STRKCLLIALNRVYRLRRQ
Platynothrus_peltifer4    RRRKRTLKPEISLIEVRKNW-----G-----KLKSS
                                *****
                                ICL3          TM6
Platynothrus_peltifer5    RLRRIHSQIDLKDLRNSLNLSVKVNDLNSTPRSHSLRLVSRAKIKTVITIVIMLCYV
Platynothrus_peltifer3    QVEVSVEK-DC-----GKEDYNSPRTHSIHGLTRAKIKTVITIVIMLCYI
Platynothrus_peltifer1    RVVSVVDG-PK-----SRGTY-NPRSHLNGLSRAKIKTVITIVVILCYI
Platynothrus_peltifer2    DTETAEIQICNDNQEVRPLHTVVTFQESVSSSPRVNTFNRLSRAKIKTVITVVVILCYV
Platynothrus_peltifer4    DDKSRLQSDRC-----LANNLLNPRSHSIYRISKAKIKTVVTVVVILCYI
                                *****
                                TM6
Platynothrus_peltifer5    ICSMPFISVQLWVYWFPSAQSFFQTSE---LSNIY-----
Platynothrus_peltifer3    FCSTPFICVQLWAYWWPNAQQSPIWNKYTYLSNNFA-----
Platynothrus_peltifer1    ICSSPFICVQLWAYWWPNAQNSTFWGKCSENSFIIQFRYSFQ
Platynothrus_peltifer2    ICSSPFICVQLWAYWWPNASTTFWNGMFSLFII-----
Platynothrus_peltifer4    VCSSPFICVQVWAYWYPSAQETSFWTGKH
                                *****

```

Alignment of 2 inotocin receptor sequences of *Strigamia maritima*:

```

Strigamia_maritima1    MSNESHWEDDLTMDNATSNAPPQS-----S--AIADAKL----TVL
Strigamia_maritima2    MA--THAE---GDSYTRTNPPTKTIPMDDNPNYNNKTTDGIMDIRDNLASIEIAVQ
                                *****
                                TM1          TM2
Strigamia_maritima1    ALMFATIMLGNTIVITSLL--IRRKKLTMYFFILHLCIADLIVAFLHVLPQLCWDVTHR
Strigamia_maritima2    SIILVVAIISNSFVFAALCCQRFRPTSMYLFMLHLSVADLVAFLSLLPQLIWDVTFR
                                *****
                                TM3          TM4
Strigamia_maritima1    FQGNDFLCKVIFGQLLGPYLSSYILVGMAIDYLAICFPLN-SWAATRS-KGMVCVAWV
Strigamia_maritima2    FQGSDILCVVVYLQVMVLYLSTYILVMMAVDCRAVCWSITGHWNSLAAKLMIVGAWV
                                *****
                                TM4          TM5
Strigamia_maritima1    VSVVFSSPQMFSYKYVSVLKYWECWVDFTLE-EEFAYVTWYFVANTFVPLLVLVYTS
Strigamia_maritima2    LAFLAIPQAIIFGKMEI-RPGVHDCWAHFEQPWGEFAYVTWFVLSIFIPLIVIAASYG
                                *****
                                ICL3
Strigamia_maritima1    AICWAVWRNFRHKKNSPKGDFSAASSPTATHLSVPQVNHIQRNGSCRFKASESVNP
Strigamia_maritima2    FICYTLWIYDEEHGR--SGDVIALRAVGNGTG-----GGDTVTDSCRLYSRRVA--
                                *****
                                TM6          TM7
Strigamia_maritima1    RSHGLQRISRAKIKTVLTVVVITCYLLCSMPYTCAMMWVAYDKRAQETAFYKGLPPVL
Strigamia_maritima2    GVSNPNPISEAVTLLTFLVVVCFFVCWSPFCITQLVLTFNPPSPDA--QIGSVEVIL
                                *****
                                TM7
Strigamia_maritima1    VLVASLNSCVNPVYLLFNKNLVHTLRHYLCCSKENEMKSHRTLATTSRTSFSESVGPR
Strigamia_maritima2    LLLASLNSCTNPWIYVAFSGSLLNQLRMCLGLGLTRPK---DIASIGDEEPQPQQQP-

```



```

Strigamia_maritima1  :*:*****.***:*. * .*. ** * . . . . . :*: . . . :. *
Strigamia_maritima2 VALQSLPPSSNNFLRVNDNKLNVRVAAVSDSALYSCEKRHSSPNLNVKSAASTLVLCSSQ
--TNKLPSTKSEMV-----
:.* * :. . . :
Strigamia_maritima1  HHHDTQNHLKDGVTMETQCA
Strigamia_maritima2 -----

```

**Alignment of 4 different splicing variants of inotocin receptor sequences of *Daphnia magna*:**

**TM1**

```

Daphnia_magna4  MASSSLLSNVTNVTTTELASSSRDE LASIEIGTLSFILLAVTSNLTMLIAIWRQRNRNP
Daphnia_magna3  MASSSLLSNVTNVTTTELASSSRDE LASIEIGTLSFILLAVTSNLTMLIAIWRQRNRNP
Daphnia_magna1  MASSSLLSNVTNVTTTELASSSRDE LASIEIGTLSFILLAVTSNLTMLIAIWRQRNRNP
Daphnia_magna2  MASSSLLSNVTNVTTTELASSSRDE LASIEIGTLSFILLAVTSNLTMLIAIWRQRNRNP
*****

```

**TM2** **TM3**

```

Daphnia_magna4  LSRMYFFMMHLSLADLLVALFNILPQLAWDI TYRFHGGDVLCHFVY YTQIMTLYLSTYLL
Daphnia_magna3  LSRMYFFMMHLSLADLLVALFNILPQLAWDI TYRFHGGDVLCHFVY -----
Daphnia_magna1  LSRMYFFMMHLSLADLLVALFNILPQLAWDI TYRFHGGDVLCHFVY YTQIMTLYLSTYLL
Daphnia_magna2  LSRMYFFMMHLSLADLLVALFNILPQLAWDI TYRFHGGDVLCHFVY YTQIMTLYLSTYLL
*****

```

**TM4**

```

Daphnia_magna4  MFMAVDYRAYCCRNLHWNLSLVA CFVAASWVMSMLFAIPQAV IFHEEEISVGVTDWCWV
Daphnia_magna3  -----TNSRFLVA CFVAASWVMSMLFAIPQAV IFHEEEISVGVTDWCWV
Daphnia_magna1  MFMAVDYRAYCCRNLHWNLSLVA CFVAASWVMSMLFAIPQAV IFHEEEISVGVTDWCWV
Daphnia_magna2  MFMAVDYRAYCCRNLHWNLSLVA CFVAASWVMSMLFAIPQAV IFHEEEISVGVTDWCWV
*****

```

```

Daphnia_magna4  QFAEPWGAAYVTFV-----VS
Daphnia_magna3  QFAEPWGAAYVTFV-----VS
Daphnia_magna1  QFAEPWGAAYVTFV-----VS
Daphnia_magna2  QFAEPWGAAYVTFVVSIFGAPLLVVAVCYXXXXXXXXXWVQFAEPWGAAYVTFVVS
*****

```

**TM5** **ICL3**

```

Daphnia_magna4  IFGAPLLVVAVCYGVICRQIWIYSQSAQPSLLPSDNSAIPSHSSITETGSTLSVMRRWFL
Daphnia_magna3  IFGAPLLVVAVCYGVICRQIWIYSQSAQPSLLPSDNSAIPSHSSITETGSTLSVMRRWFL
Daphnia_magna1  IFGAPLLVVAVCYGVICRQIWIYSQSAQPSLLPSDNSAIPSHSSITETGSTLSVMRRWFL
Daphnia_magna2  IFGAPLLVVAVCYGVICRQIWIYSQSAQPSLLPSDNSAIPSHSSITETGSTLSVMRRWFL
*****

```

**ICL3**

```

Daphnia_magna4  RAGMRWQKSRNSSNAIKNNSATASQLSDTIPMRSLATQQASNPLTTPDTIPMRSLATQQA
Daphnia_magna3  RAGMRWQKSRNSSNAIKNNSATASQLS-----ADPIPMSLATQQA
Daphnia_magna1  RAGMRWQKSRNSSNAIKNNSATASQLS-----DTIP-----
Daphnia_magna2  RAGMRWQKSRNSSNAIKNNSATASQLS-----DTIPMRSLATQQA
*****

```

**ICL3** **TM6**

```

Daphnia_magna4  SNPLTTENKISPMPLQPPPAAPQR CQOMSLRRSNSNQNRITKAKMTI I LTLAVVLCFVA
Daphnia_magna3  SNPLTTENKISPMPLQPPPAAPQR CQOMSLRRSNSNQNRITKAKMTI I LTLAVVLCFVA
Daphnia_magna1  -----NKISPMPLQPPPAAPQR CQOMSLRRSNSNQNRITKAKMTI I LTLAVVLCFVA
Daphnia_magna2  SNPLSTENKISPMPLQPPPAAPQR CQOMSLRRSNSNQNRITKAKMTI I LTLAVVLCFVA
*****

```

**TM6** **TM7**

```

Daphnia_magna4  CWAPFCITQLIMVYCPPTSQADVSPVAVIILLASLNSCSNPWIY LAFSGSLLNQMRVCL
Daphnia_magna3  CWAPFCITQLIMVYCPPTSQADVSPVAVIILLASLNSCSNPWIY LAFSGSLLNQMRVCL
Daphnia_magna1  CWAPFCITQLIMVYCPPTSQADVSPVAVIILLASLNSCSNPWIY LAFSGSLLNQMRVCL
Daphnia_magna2  CWAPFCITQLIMVYCPPTSQADVSPVAVIILLASLNSCSNPWIY LAFSGSLLNQMRVCL
*****

```

```

Daphnia_magna4  GLRWLRGQDKDSIGEDRRGAAGPAGGQPADTNHRFGRGPRRAQTRDQHRQV-----
Daphnia_magna3  GLRWLRGQDKDSIGEDRRGAAGPAGGQPADTNHRFGRGPRRAQTRDQHRQVMAEQQLLP
Daphnia_magna1  GLRWLRGQDKDSIGEDRRGAAGPAGGQPADTNHRFGRGPRRAQTRDQHRQVMAEQQLLP
Daphnia_magna2  GLRWLRGQDKDSIGEDRRGAAGPAGGQPADTNHRFGRGPRRAQTRDQHRQVMAEQQLLP
*****

```

```

Daphnia_magna4  -----
Daphnia_magna3  AGEQHPAMLATKCTRADIVTHLGNTKKLQFQQNHQHVEKIG
Daphnia_magna1  AGEQHPAMLATKCTRADIVTHLGNTKKLQFQQNHQHVEKIG
Daphnia_magna2  AGEQHPAMLATKCTRADIVTHLGNTKKLQFQQNHQHVEKIG

```

**Supplementary Figure S3. Alignment of inotocin receptors.** Alignment of 125 putative inotocin receptor sequences of arthropods. Conserved sequence motifs XPQX<sub>2</sub>WX<sub>5-6</sub>F and CXNPW are highlighted green and grey, respectively. Residues that diverge from the consensus of motif conservation are highlighted in red.

|                               | 1     | 60                                                       |
|-------------------------------|-------|----------------------------------------------------------|
| Varroa_destructor1            | ----- | -----                                                    |
| Metaseiulus_occidentalis1     | ----- | -----                                                    |
| Metaseiulus_occidentalis2     | ----- | -----                                                    |
| Tigriopus_californicus        | ----- | MATLLSSDIEAKMDKEPQDNPYNSIP---DS                          |
| Anurida_maritima              | ----- | -----                                                    |
| Meinertellus_cundinamarcensis | ----- | -----                                                    |
| Pogonognathellus_sp           | ----- | MATN-----SNTTNEI----S                                    |
| Triops_cancriformis           | ----- | -----                                                    |
| Strigamia_maritima2           | ----- | MATH----AEGDSYTRTNPPTKTIP---MD                           |
| Catajapyx_aquilonaris         | ----- | -----                                                    |
| Daphnia_pulex                 | ----- | -----                                                    |
| Daphnia_magna3                | ----- | -----MA---SS                                             |
| Daphnia_magna2                | ----- | -----MA---SS                                             |
| Daphnia_magna1                | ----- | -----MA---SS                                             |
| Daphnia_magna4                | ----- | -----MA---SS                                             |
| Arachnocampa_luminosa         | ----- | -----MTSYQENILP-N---YSEQD                                |
| Calanus_finmarchicus          | ----- | -----                                                    |
| Epiophlebia_superstes         | ----- | -----                                                    |
| Ladona_fulva                  | ----- | -----                                                    |
| Cordulegaster_boltonii        | ----- | -----                                                    |
| Diaphorina_citri              | ----- | -----                                                    |
| Pachypsylla_venusta           | ----- | -----                                                    |
| Acanthocasuarina_muellerianae | ----- | -----                                                    |
| Glomeris_pustulata            | ----- | -----                                                    |
| Frankliniella_cephalica       | ----- | -----                                                    |
| Machilis_hrabei               | ----- | -----                                                    |
| Carabus_granulatus            | ----- | -----                                                    |
| Dendroctonus_frontalis        | ----- | -----                                                    |
| Lepeophtheirus_salmonis       | ----- | -----                                                    |
| Caligus_rogercresseyi         | ----- | -----                                                    |
| Parhyale_hawaiensis           | ----- | -----MLDEPLPTMSEELVL-NVSVNA--SE                          |
| Hyalella_azteca               | ----- | -----                                                    |
| Strigamia_maritima1           | ----- | -----MSNE-----SHW---                                     |
| Conwentzia_psociformis        | ----- | -----IPYKMNDFNATDQ-----NYGFEYF-----LNSTA---SD            |
| Liposcelis_bostrychophila     | ----- | -----MNTKAREFGNKGKRKT-STRSQKHLSHNEKMDEEARQSSIPDINLT----- |
| Tetranychus_urticae           | ----- | -----MDLSSFGSLEF---STL--SVFSTNETSSTLPSLVLPFDVNLTSRRYL    |
| Osmylus_fulvicephalus         | ----- | -----R---TTM--ALMNNSVGMGVPTPSLELVGVLAAGGGG               |
| Ornithodoros_turicata         | ----- | -----                                                    |
| Acerentomon_sp                | ----- | -----M--ANQSLN-----VGDPWI--NETQVAEHVL                    |
| Ixodes_ricinus                | ----- | -----MDLV---A--NQDQPAF-ST                                |
| Folsomia_candida              | ----- | -----PLHED-NF                                            |
| Limulus_polyphemus1           | ----- | -----MSTL---DF-GETPEIL-NV                                |
| Limulus_polyphemus3           | ----- | -----MSSL---KE-EQTTELT-NA                                |
| Platynoctrus_peltifer5        | ----- | -----METVSDLITF-SREQEF--DF                               |
| Platynoctrus_peltifer1        | ----- | -----MEEIGTTVTL-EE-----                                  |
| Platynoctrus_peltifer3        | ----- | -----                                                    |
| Achipteria_coleoptrata2       | ----- | -----M--SSDSSDMSVENISQTIIF-QI-----                       |
| Platynoctrus_peltifer2        | ----- | -----ME-VSTAIS--EE-----                                  |
| Platynoctrus_peltifer4        | ----- | -----MSNVIMSI--NN-----                                   |
| Ixodes_scapularis2            | ----- | -----                                                    |
| Ixodes_scapularis1            | ----- | -----MDV-P--SNQKPEFAASVP-----                            |
| Ixodes_scapularis3            | ----- | -----MDLVA--NQDQPAFSTSLP-----                            |
| Cotesia_vestalis              | ----- | -----                                                    |
| Microplitis_demolitor         | ----- | -----                                                    |
| Zorotypus_caudelli            | ----- | -----                                                    |
| Nasonia_giraulti              | ----- | -----                                                    |
| Nasonia_vitripennis           | ----- | -----                                                    |
| Varroa_destructor2            | ----- | -----                                                    |
| Leuctra_sp                    | ----- | -----                                                    |
| Tricholepidion_gertschi       | ----- | -----                                                    |
| Perla_marginata               | ----- | -----                                                    |
| Crioscolia_alcione            | ----- | -----ME-----                                             |
| Mischocyttarus_flavitaris     | ----- | -----                                                    |
| Polistes_metricus             | ----- | -----                                                    |
| Polistes_canadensis           | ----- | -----                                                    |
| Chrysis_viridula              | ----- | -----                                                    |
| Argochrysis_armilla           | ----- | -----                                                    |
| Chyphotes_mellipes            | ----- | -----                                                    |



Epiophlebia\_superstes -----GGRDEELAKAEIATLAAMLAVSVIGNGAVLVA-LWVRPRPSP  
 Ladona\_fulva -----MATLAAMLVIVSIVGNVAVMVA-LWARPRPSP  
 Cordulegaster\_boltonii -----MATLAAMLVVSVVGNVAVLVA-LWARPRPSP  
 Diaphorina\_citri -----  
 Pachypsylla\_venusta --MDESNGTLVNYNDTSDSDEDEDLARVEILTLIIILVITIVGNIMVLFA-LYRRHFQK  
 Acanthocasuarina\_muellerianae -----  
 Glomeris\_pustulata -----  
 Frankliniella\_cephalica -----  
 Machilis\_hrabei -----  
 Carabus\_granulatus -----  
 Dendroctonus\_frontalis -----  
 Lepeophtheirus\_salmonis -----VSNTSLNTPSSPNSLLHTKLWVLGIIIVLTLGNISVILA-IATRF----  
 Caligus\_rogercresseyi -----EGNSLHQTKLWVLGIIIVLTLGNISVILA-IATRH----  
 Parhyale\_hawaiensis DAINFD--ILSVQNNTSFGSRDEVLAFAEVLTLASIFVVTIVGNCIVIFK-HFMRR----  
 Hyalella\_azteca -----  
 Strigamia\_maritima --EDDL--TMDNATSNAPPQSSAIADAKLTVLALMFATIMLGNTIVITS-LLIRR----  
 Conwentzia\_psociformis AVIEAG--TDLAAASDNGDERNEELAKIEIILIVIFNVTLIGNLVLLA-LSARKRYSG  
 Liposcelis\_bostrychophila --ADPTMELVVRKNDSTDDFRNEDLAQIEIGTLGVILIVTLGNGLVLLA-LYAKCKAG  
 Tetranychus\_urticae KAVSTGSPSASSLSSSAHSRDNLAILEIITLSAIFVMIVFGNTSVLLA-LILSR----  
 Osmylus\_fulvicephalus GLLLPVDPTSANSTAMHDYDRDEALAQVEIGTLALIFGVTLGNVAVLVA-LYIRRRYSG  
 Ornithodoros\_turicata -----  
 Acerentomon\_sp NVGDPWTNETQEAEDGFKYERNEDLARIEIAILAAIFCATVIGNVVLVA-LFNTK----  
 Ixodes\_ricinus SLPDPL-DDVPVNDTSWTGRDESLAQIELGVLTAIFFTVIGNNTVLLA-LAARR----  
 Folsomia\_candida SLTPNL-SL-VNTTLTPASPRDEFKAEIQSVLAIIFLITIVGNFLVLMG-IYFRK----  
 Limulus\_polyphemus1 SFMNSS-TI-INNTKDKGIQRDETIARIEVGLASIFTLTILGNMCLVLA-LAVRR----  
 Limulus\_polyphemus3 SFVNFSP-PI-E-NITVGDTRQDETIARVEVGLAIFLITLIGNTCVLA-LAVRR----  
 Platynothrus\_peltifer5 ELLNDS-NNVKNSSFEIRDSRNEISLAIIEISLLTFMFIISILIGNIFVLA-LIVRD----  
 Platynothrus\_peltifer1 --LEDK-LPETIIANVTKDSRDEHLAVFEIATLGLIFLIVFGNSCVLIA-LYMRK----  
 Platynothrus\_peltifer3 -----M--TGNGSLTVKRDEKWLLEIGILSLIFLIVFGNSCVLIA-LQVRK----  
 Achipteria\_coleoptrata2 --INDD-NM--TANTSLAVKRNEKLVLEIGILLIFLIVFGNSCVLIA-LQINK----  
 Platynothrus\_peltifer2 --TDGI-PFETSIIKPNITGRNENLALIEVGTGTIFVLIIVFGNCCVLLA-LALRR----  
 Platynothrus\_peltifer4 --TTSV-LYN----ISGSDKRDENLAIMEVSIILALIFLIIIGNLCLVLA-LAVKR----  
 Ixodes\_scapularis2 -----QVEVAVLTFIFGFTVLGNTCVLVA-LAAR----  
 Ixodes\_scapularis1 ----TVLNFASTNLTAETREDESALVELAVLTLIFAFVTMGNSTVLLA-LATR----  
 Ixodes\_scapularis3 ----DSLDDVPVNETFTWTRDESLAQIELGVLTAIFFTVIGNNTVLLA-LAAR----  
 Cotesia\_vestalis -----DNSTSLDTRDENLAFWEIIVLVINLIITLIGNCFIIFA-LYLRRYH--  
 Microplitis\_demolitor -----MMGNSTQPDTRDENLAIWEITVLAINLIITIGNCLIFFA-LYLRRYH--  
 Zorotypus\_caudelli -----LLVIILLVTLVGNVILVFA-IYVRRCR--  
 Nasonia\_giraulti ----MEESATSMIAVPAEDWRDESLAVWEIVLVILITTTLMGNVVLVA-IYLRKCR--  
 Nasonia\_vitripennis ----MEESATSMIAVPAEDWRDESLAVWEIVLALILITTTMGNVVLVA-IYLRKCR--  
 Varroa\_destructor2 -----E  
 Leuctra\_sp -----LVTAVVANLLVLTAL-LILRS----  
 Tricholepidion\_gertschi -----  
 Perla\_marginata -----EVTSLAAIFLTALAGNVCLVA-LYGHR----  
 Crioscolia\_alcione G-----MPEDQNSSEIDGRDEYLAKWEITVLTSLILLTLLGNTLVLS-LYIRKRY--  
 Mischoctytarus\_flavitaris ----MNETTNSSTFAANEEDIRDENLAKWEIVLLANILIFTIFGNLSVLLS-LYLRRYR--  
 Polistes\_metricus ----MNETTNSSTFVANEKDRDENLAKWEIVLLANILIFTIFGNLSVLLS-LYLRKRY--  
 Polistes\_canadensis -MSV---EQNLVTEETEEDVRDEYLAKWEIIVLATILYMTLVGNLSLLFA-LYLRKRR--  
 Chrysis\_viridula -----  
 Argochrysis\_armilla -----MYRDRNATARGCTAGERDERDEYLARWEIAVLVTLVVTILGNLVLLS-LHVRHR--  
 Chyphotes\_mellipes DMFADRNSSEVQTSDELDDERDEELAKWELVVLASILVITLVGNLVLLA-LYARRYH--  
 Brachycistis\_timberlakei -MYNDRNNT-TTLGEAKDDTRDEELAKWEIGVLTIFITILGNLSVLLA-LYIRRR--  
 Sphaerophthalma\_orestes ---MAND-LVFNSSLASDLERDEELARAEIAVLAVIVVVTVTGNTAVLVA-LYARRFC--  
 Homalodisca\_vitripennis ----FSTERVNESVAVSNGGDRDEDLARVEATLAAIATLGNSTVLLA-LYMRRTW--  
 Cercopis\_vulnerata ----ENITEELKNNTTVSDTRDEHLAIFEIATLSLLFVLILFGNSCVLLA-LLMR----  
 Nilaparvata\_lugens -----IATLAIIFGVTVLGNVCLVA-ISFR----  
 Achipteria\_coleoptrata2 -----  
 Ephemera\_danica -----  
 Leptopilina\_clavipes -----  
 Ganaspis\_sp -----MENGTLINDTRDEELAKWEIGILACFFVIIIGNSLVLLS-IYLRKY--  
 Leptopilina\_boulardi -----MENGTLINDTRDEELAKWEIGILACFFVIIIGNSLVLLS-IYLRKY--  
 Mantis religiosa -----AILSTLFVIVLGNSSVLLA-LSSR----  
 Blattella\_germanica --MENASQAVNGSTTAEDLDRDEVLARAEIATLSVMFTVTVGNFVLLV-LSAR----  
 Zootermopsis\_nevadensis --EVSEACNLTANSTSGLDREDEALAEIATLATMLTIVTLGNFVLLA-LSAR----  
 Stigmatomma\_oregonense ---LSLSLSPSSSERTSNDARDEYLARWEIAVLTSIFLITLIGNLVLLA-LYVRRH--  
 Dinoponera\_quadriceps --STS--SPPSASEQTPVDGRNEDLAKWEIALTSIFLITLIGNLVLLA-LYARKR--  
 Harpegnathos\_saltator ---SSLSLP-PSEQKTSVDRDEYLAKWEIAVLTSIFLITLIGNLVLLA-LYVRRY--  
 Cerapachys\_biroi ---SSPSSSSPSSLEVSDDLREYLARWEIAVLTSIFLITLIGNLVLLA-LYARRCY--  
 Monomorium\_pharaonis ---SSPSSPSEWPLDDARDEYLARWEIAVLTSIFLITLIGNLVLLA-LYVRRY--  
 Tetramorium\_bicaratum ---SSSLTSPSPPLPDDARDEYLARWEIAVLTSIFLITLIGNLVLLA-LYARRY--  
 Solenopsis\_invicta ---SSS---SPPSSEWPPDDARDEYLARWEIAVLTSIFLITLIGNLVLLA-LYARRY--  
 Atta\_cephalotes ---SSS---SSEL---PLDDARDEYLARWEIAVLTSIFLITLIGNLVLLA-LYARRY--  
 Acromyrmex\_echinator ---SSS---SSEL---PLDDARDEYLARWEIAVLTSIFLITLIGNLVLLA-LYARRY--  
 Pogonomyrmex\_barbatus ---S-----S-LSSEWPPDDVRDEYLARWEIAVLTSIFLITLIGNLVLLA-LYTRRRY--  
 Wasmannia\_auropunctata ---SSSSP--LSSDRPQDDARDEYLARWEIAVLTSIFLITLIGNLVLLA-LYVRRY--  
 Vollenhovia\_emeryi ---SSSSTP-SLSEWPSNDARDEYLAKWEIAVLTSIFLITLIGNLVLLA-LYIRRRY--  
 Orussus\_abietinus -EDEMADPPPTTNPVEDFRSDLARWEIFTLAAIILLENLVA-LYLR----

Blaberus\_atropos  
Limulus\_polyphemus2  
Isonychia\_bicolor  
Occasjapyx\_japonicus  
Baetis\_sp  
Panonychus\_ulmi  
Frankliniella\_occidentalis  
Eurylophella\_sp  
Telenomus\_podisi  
Aposthonia\_japonica  
Haploembia\_palau  
Halyomorpha\_halys  
Stenobothrus\_lineatus  
Inocellia\_crassicornis  
Tenthredo\_koehler  
Corydalus\_cornutus  
Chrysopa\_pallens  
Meloe\_violaceus  
Aethina\_tumida  
Gyrinus\_marinus  
Tribolium\_castaneum  
Microphorus\_vespilloides  
Aleochara\_curtula  
Pogonus\_chalceus  
Sipyloidea\_sipylus  
Extatosoma\_tiaratum  
Aretaon\_asperimus  
Medauroidea\_extradentata  
Ramulus\_artemis  
Gallosiana\_yuasai  
Athalia\_rosae

-----  
SF--VNLSTITNNTKADVQDETVARIEVAVLATIFTLTVIGNTVLVA-LVVR-----  
-----VGNTCVLLA-IRHR-----  
SPRMNASSNASATGGMNGYERNEDLAKVEIALLSTIFVLTVIGNSMLVA-IFLK-----  
--MDSSVDNSTTTTVDVAVPTRDEQLARVEIATLAFIFAVTVIGNSLILSA-ILFRR-----  
-----RDENLAIIEIITLSAIFVMIVFGNTSVLLA-LLSL-----  
-----APQVEVAVLGVLLVLTVLGNNAVLLA-LYARRC-----  
-----FVVTTIGNSCVLVA-LSLR-----  
----MPVESQTVKNVTEDFRDESLAQWEVGLAAIFVITIIIGNSLVLLA-IYLRRYR-----  
-----MNSSAEKSDGDRDEDLARVEVTLAIFAITLVGNLLVLLA-LLVL-----  
-MVHRKRQNDVMNSSVADGRDEDLARVEVTLAIFAITLVGNLLVLLA-LLVL-----  
-----PNDSINCSAVHERDEDLAKIEMATLAVMFVMTVVGNLVA-LFARRQS-----  
-----  
--MNGTELKISAPETNGNERDEVLAQAEIITSAVIFVVTVIGNGTVLLA-LFARQKY--  
SF--VESECNLTISSEIDDSRDEYLAWEVATLALIFVVAIAGNSLVLLA-FYFRRYD--  
-----  
-----ILTLAIFVVTLLGNLVA-LYNRQKC-----  
-SIENTTKSLRDDTEESPTDRDESLARIEIATLAVIFLITVIGNSTVLLA-LWARRRF-----  
----TSTGETIEELERAAKERDESLAKIEVAVLAVIFVTVIGNSTVLLA-LWARRC-----  
-----MNTTANATDQTFDRDENLAQFEIATLAVIFVVTVIGNGTVLLA-LWTRRR-----  
DISENSTYLFDKHEDRNNDRDENLARVEVATLAIIFLVTVIGNSTVLLA-LWTRRRY--  
SL--RGSPPSSEEREERSSSHRDCN-----FHHHSHHX-LWTRRRY--  
-----RY-----  
-----  
SVDNGNGNSNGSNSTSSGYDRDEDLARAEIATLAVMLLVTVIGNSCILYA-LCARR-----  
-----AE--NSTNSSGGYDRDEDLARGEIATLAIMFIVTVGNLVA-LCARR-----  
-----GSSANITNSTGGYDRDENLARAEIATLAVMFIITVIGNSCILYA-LCLR-----  
-----VK--NSTNSTDGYDRDEDLAHAEIATLAVMFIITVGNLVA-LCARR-----  
-----AENSSANSTYGYDRDENLAHAEIATLATMFAITLVGNFCILYA-LCARR-----  
-----  
CA--TANEALKVDDGNDRDREDIANWEVATLAAMFVVAVFGNSLVVTA-LYLRRYGKT

Varroa\_destructor1  
Metaseiulus\_occidentalis1  
Metaseiulus\_occidentalis2  
Tigriopus\_californicus  
Anurida\_maritima  
Meinertellus\_cundinamarcensis  
Pogonognathellus\_sp  
Triops\_cancriformis  
Strigamia\_maritima2  
Catajapyx\_aquilonaris  
Daphnia\_pulex  
Daphnia\_magna3  
Daphnia\_magna2  
Daphnia\_magna1  
Daphnia\_magna4  
Arachnocampa\_luminosa  
Calanus\_finmarchicus  
Epiophlebia\_superstes  
Ladona\_fulva  
Cordulegaster\_boltonii  
Diaphorina\_citri  
Pachyphylla\_venusta  
Acanthocasuarina\_muellerianae  
Glomeris\_pustulata  
Frankliniella\_cephalica  
Machilis\_hrabei  
Carabus\_granulatus  
Dendroctonus\_frontalis  
Lepeophtheirus\_salmonis  
Caligus\_rogercresseyi  
Parhyale\_hawaiensis  
Hyalella\_azteca  
Strigamia\_maritima1  
Conwentzia\_psociformis  
Liposcelis\_bostrychophila  
Tetranychus\_urticae  
Osmylus\_fulvicephalus  
Ornithodoros\_turicata  
Acerentomon\_sp  
Ixodes\_ricinus  
Folsomia\_candida  
Limulus\_polyphemus1  
Limulus\_polyphemus3

121  
-----AHLRSRIYFLLHLSIADILVGFNI  
-----VHQLHIYHFVHLSLADMLVGVFNI  
-----RPLSRVQFLMHLTLVADILVALLNI  
-----KPSRRMYRLMYHLSIADLLVAVLNVI  
-----RPLSRMYFFMQQLSIADLMVAVFNV  
-----RPMRMYFFMLNLSVADLMVAFGNI  
-----RPLSRMYFFMLHLSLADVLVAVFNI  
-----RPTSRMYFLMHLVADLLVAFVLSL  
-----RPMRMYFFMLHLSVADLLVAVFNI  
-----RPLSRMYFFMMHLSLADLLVALFNI  
-----RPLSRMYFFMMHLSLADLLVALFNI  
-----RPLSRMYFFMMHLSLADLLVALFNI  
-----RPLSRMYFFMMHLSLADLLVALFNI  
-----RPLSRMYFFMMHLSLADLLVALFNI  
KRARWFKLNKNISRMSFYIIHLSIADFNVAFMSILPQLIWRQS-VVFNHS-HFLCKFVAF  
-----ADILTAIFTLIP  
-----RRRLSRMHLLVLYLCTADLITAAFTVLPQMAWEAT-YRFPQQAAPLCKPLKV  
-----RRRLSRMHLLVHLCTADLITAAFTVLPQMAWEAT-YRFPQQAAPLCKPLKV  
-----RRRLSRMHLLVHLCTADLITAAFTVLPQMAWEAT-YRFPQQAAPLCKPLKV  
-----MV  
-----QIKMPRMYFIFLHLSIADLITAFFNVLPQLIWDIT-YRFPGSSNWLCKLVKF  
-----  
-----IKMTRMYFFILHLSIADVLTAFVTLPL  
-----IKMTRMYFFILHLSIADVLTAFVTLPL  
-----KKFRRMNYFIFALSLSLVTAMFNVL  
-----SDLVTAAFNVFPQLMWDIT-FRFRGG-DFLCRSVKF  
-----KKLTRMYFFILHLCIADLIVAFVHVL  
-----HRKLRMYFFILHLSLADLISAFNLVLPQMIWK  
-----KKTLSRMYFYIFHLVADLITAFVHVL  
-----IKLRRMYFFLHLSIADLITAFVHVL  
-----RKKLSRMYFFILHLSIADLITAFVHVL  
-----KKMTRMYFFMMHLSIADLITAFVHVL  
-----SKMSRMYFFLHLCVSDLITAFVHVL  
-----QKMTRMYFYIAHLAIADLITAFVHVL  
-----IKMARMYFFLHLCISDLITAFVHVL  
-----TNMTRMYFFLHLCISDLITAFVHVL

XPQX<sub>2</sub>WX<sub>5-6</sub>F motif

180

Platynothrus\_peltifer5 -----SKMNRMYFYLHLCIADLITAFFNVLPLQIWDIT-YRFYGG-NVLCKLIKY  
 Platynothrus\_peltifer1 -----LKMNRMYFLLHLCIADLITAFFNVLPLQAWDIT-YRFYGG-NILCKTIKY  
 Platynothrus\_peltifer3 -----LKMNRMYFLLHLCIADLITAFFNVLPLQAWDIT-YRFYGG-NFLCKTIKY  
 Achipteria\_coleoptrata2 -----LKMNRMYFYLQHLSDMI TAFFNVLPLQAWDIT-HRFYGG-NILCKTIKY  
 Platynothrus\_peltifer2 -----LKMTRMYFLLHLCISDLMTGFFTVLPLQAWDIT-YRFNGG-NILCKAVKS  
 Platynothrus\_peltifer4 -----FKMTRMYFLLHLCISDIITGCFTVMPQLAWDIT-HRFNGG-NILCKLVK  
 Ixodes\_scapularis2 -----RSKMTRMYFLLHLCVSDLITAFLSVLPQLGWDAT-YRFQGG-NLACKAVKF  
 Ixodes\_scapularis1 -----RSKMTRMYFLLHLCVSDLITAFLTVPQLGWDAT-YRFQGG-NLACKAVKF  
 Ixodes\_scapularis3 -----RSKMSRMYFLLHLCVSDLITAFFTVLPLQAWDIT-YRFQGG-NLACKTVKF  
 Cotesia\_vestalis -----GRQRKLTRMYFFMMHLSIADFITGIFNLPQLSWDIT-FRFQGG-PAMCKIVKF  
 Microplitis\_demolitor -----GRQRKLTRMYFFMHLHSIADFTVTGIFNVLPLQAWDIT-FRFQGG-YGLCKIKF  
 Zorotypus\_caudelli -----GRRHRLTRMHFFVMHLSIADLINGLLNVLPLQAWDIT-FRFQGG-QILCKMVKF  
 Nasonia\_giraulti -----GRRQLTRMHFFVMHLSVADLITGLLNVLPLQAWDVT-FRFQGG-PILCKLVKF  
 Nasonia\_vitripennis -----GKRQLTRMHFFVMHLSVADLITGLLNVLPLQAWDVT-FRFQGG-PILCKLVKF  
 Varroa\_destructor2 A-----RRSSLSRVQLFMMHLSIADILVALNLPQLAWDIT-ARFYGG-ALLCKFVKY  
 Leuctra\_sp -----RRQLARLHFFILHLSLADLVNALFNVLPLQVWKST-FRFVGG-TVLCCKLVKF  
 Tricholepidion\_gertschi -----  
 Perla\_marginata -----NRKLTRMHFFILHLTIADMTAVFSVMPQMLWKAT-YRFAGG-PTLCKVVKV  
 Crioscobia\_alcione -----ER-RKFTRMYFFIMHLSVADMLTGLLNVLPLQAWDIT-FRFQGG-ALLCKAVKF  
 Mischocyttarus\_flavitaris -----  
 Polistes\_metricus -----AH-KKLSRMYFFIMNLSIADLLTGLLDVLPQLAWDIT-FRFQGG-LVLCKLVKF  
 Polistes\_canadensis -----AH-KKLSRMYFFIMNLSIADLLTGLLDVLPQLAWDIT-FRFQGG-LVLCKLVKF  
 Chrysis\_viridula -----GRRRKFTRMHFFILHLSIADLITGLFNVLPLQAWDIT-FRFQGG-NILCKLVKF  
 Argochrysis\_armilla -----  
 Chyphotes\_mellipes -----QR-RKFTRMYFFIMHLSVADLLTGLLNVLPLQAWDIT-FRFKGG-PILCKLVKF  
 Brachycistis\_timberlakei -----CR-RKFTRMYFFIMHLSIADLLTGLLDVLPQLAWDIT-FRFQGG-PVLCKMVKF  
 Sphaerophthalma\_orestes -----GR-RKFTRMYFFIMHLSIADLITGLCDVLPQLAWDIT-FRFQGG-PMLCKIVKY  
 Homalodisca\_vitripennis -----TGNKLSRMYFFILHLCVADLITGLLNVLPLQAWDIT-YRFKGG-NLCKVVKY  
 Cercopis\_vulnerata -----GRRKLSRMYFFILHLCIADLVTALLNVLPLQIWDIT-FRFKGG-PFLCKLVKY  
 Nilaparvata\_lugens -----GRRKLSRMYFFILHLCIADLVTGLLNVLPLQIWDIT-YRFQGG-PLLCKLVKY  
 Achipteria\_coleoptrata1 -----KIKMNRMYFLLHLIADYLVAFNVLPLQIWDIT-YRFYGG-NLLCKVIKY  
 Ephemera\_danica -----RAKLSRMYFFIMHLSVADLITAFFNVLPLQAWDIT-YRFCLS--QLCRGVKF  
 Leptopilina\_clavipes -----VADLLTAVLNVLPLQAWKIT-FRFQGG-PFLCKLIK  
 Ganaspis\_sp -----SQRKKLTRMHFFIMNLSVADLLTAIILNVLPLQAWKIT-FRFQGG-PILCKLIK  
 Leptopilina\_boulardi -----GQRKKLTRMHFFIMNLSVADLLTAIILNVLPLQAWKIT-FRFQGG-QILCKLIK  
 Mantis\_religiosa -----RRKKLSRMYFFILHLSIADLITALLSVLPQLAWDIT-YRFHGG-NILCKLIKY  
 Blattella\_germanica -----PRKKLSRMYFFILHLSIADLCTAFLSILPLQAWDVT-YRFQGG-PIMCKVVKY  
 Zootermopsis\_nevadensis -----PRKKLSRMYFFILHLSVADLCTAFLSVLPQLAWDVT-YRFYGG-PLLCKIVKY  
 Stigmatomma\_oregonense -----QRRKFTRMYFFILHLCVADLLTDLNVLPLQAWDIT-FRFQGG-AVLCKLIK  
 Dinoponera\_quadricaps -----QRRKFTRMYFFILHLSIADLLTGLFDVLPQLAWDIT-FRFQGG-AVLCKLIK  
 Harpegnathos\_saltator -----QRHKFTRMYFFILHLSIADLLTGLLDVLPQLAWDIT-FRFQGG-AVLCKLIK  
 Cerapachys\_biroi -----QRRKFTRMYFFILHLSIADLLTGLLDVLPQLAWDIT-FRFQGG-AVLCKLIK  
 Monomorium\_pharaonis -----QRRKFTRMYFFILHLSVADLLTGLLDVLPQLAWDIT-FRFQGG-AVLCKLIK  
 Tetramorium\_bicarinarum -----QRRKFTRMYFFILHLSVADLLTGLLDVLPQLAWDIT-FRFQGG-AVLCKLIK  
 Solenopsis\_invicta -----QRRKFTRMYFFILHLSVADLLTGLLDVLPQLAWDIT-FRFQGG-AVLCKLIK  
 Atta\_cephalotes -----QRRKFTRMYFFIMHLSVADLLTGLFDVLPQLAWDIT-FRFQGG-AVLCKLIK  
 Acromyrmex\_echinator -----QRRKFTRMYFFIMHLSVADLLTGLFDVLPQLAWDIT-FRFQGG-AVLCKLIK  
 Pogonomyrmex\_barbatus -----QRRKFTRMYFFILHLSIADLLTGLLDVLPQLAWDIT-FRFQGG-AVLCKLIK  
 Wasmannia\_auropunctata -----QRRKFTRMYFFILHLSVADLLTGLLDVLPQLAWDIT-FRFQGG-AVLCKLIK  
 Vollenhovia\_emoryi -----QRRKFTRMYFFILHLSVADLLTGLLDVLPQLAWDIT-FRFQGG-AALCKLIKY  
 Orussus\_abietinus -----GRRKLSRIQFFILHLSIADLLTGLLNVLPLQAWDIT-FRFQGG-DLLCRLVKF  
 Blaberus\_atropis -----  
 Limulus\_polyphemus2 -----RIKTRMYFYLQHLCSIDLITAFFHVLPLQAWDVT-YRFYGG-NVLCKIVKY  
 Isonychia\_bicolor -----RSKLTRMYFYIFHLSIADLVTAFNVLPLQAWDIT-YRFKGG-DELCKIKF  
 Occasjapyx\_japonicus -----RKKMSRMYFFILHLSIADLITGFFNVLPLQAWDIT-YRFYGG-NFMCKFIKY  
 Baetis\_sp -----RVKLTRMYFYIFHLSIADLVTAFNVLPLQAWDIT-YRFKGG-NLCKGVKF  
 Panonychus\_ulmi -----RIKLRRMYFLLHLSIADLITAFNVLPLQIWEIT-EHFYGG-QILCKGIKY  
 Frankliniella\_occidentalis -----GRRKLSRMYFFILHLSVADMTAFFSVLPQLVW-VT-FRFHGG-NFLCKAVKF  
 Eurylophella\_sp -----RAKISRMYFYIFHLSIADLVTAFNVLPLQAWDIT-YRFQGG-DILCKAVKF  
 Telenomus\_podisi -----GRRKLSRMYFFILHLSVADLITAFFDVLPLQAWDIT-FRFQGG-PILCKLVK  
 Aposthonia\_japonica -----RRKKLSRMYFFIVHLSIADLITAFFNVLPLQAWDVT-YRFQGG-PILCKIKF  
 Haploembia\_palau -----RRKKLSRMYFFIVHLSIADLITAFFNVLPLQAWDVT-YRFQGG-PILCKIKF  
 Halyomorpha\_halys -----ATRTKVPVPRMFFMHLCSVADMTAWLNLPQLAWDIT-FRFKGG-EFLCKSVKF  
 Stenobothrus\_lineatus -----QLSVVDDLNGLLNVLPLQAWDIT-FRFQGG-AVLCKLVK  
 Inocellia\_crassicornis -----SGCRKLSRMYFFILHLSIADLVTAFNVLPLQAWDIT-FRFKGG-PLLCKAVKY  
 Tenthredo\_koehlerii -----APRKKLPRIYFFILHLSIADLLTALLNVLPLQIWEIT-FRFQGG-PVLCKVVKF  
 Corydalus\_cornutus -----VTAFNVLPLQIWEIT-YRFQGG-EILCKAVKF  
 Chrysopa\_pallens -----TGRKKLSRIYFFILHLSIADLVTAFNVLPLQAWDIT-YRFQGG-VLCKAVKF  
 Meloe\_violaceus -----AGRKKLSRMYFFILHLSVADLITAFLSVLPQLAWDIT-YRFYGG-YFLCKAIKY  
 Aethina\_tumida -----AGRKKLSRMYFFILHLSIADLITAFLSVLPQLAWDIT-YRFQGG-YILCKLVKF  
 Gyrinus\_marinus -----AGRKKLSRMYFFILHLSIADLVTAFNVLPLQAWDIT-YRFQGG-AVLCKLVKF  
 Tribolium\_castaneum -----AGRKKLSRMYFFILHLSIADLITAFNVLPLQAWDIT-YRFYGG-FLLCKVVKY  
 Nicrophorus\_vespilloides -----AGRKKLSRMYFFILHLSIADLITAFNVLPLQAWDIT-FRFQGG-EVLCKLVKF  
 Aleochara\_curtula -----AGRKKLSRMYFFILHLSIADLITAFNVLPLQAWDIT-YRFYGG-GALCKMVKF  
 Pogonys\_chalceus -----MYFFILHLSIADLVTAFNVLPLQAWDIT-YRFNGG-FLLCKIVKY  
 Sipyloidea\_sipylus -----RSKLTRMYFFILHLSIADLITGMCNVLPLQAWDIT-YRFKGG-PVLCKIVKF  
 Extatosoma\_tiaratum -----KRRKLSRMYFFILHLSIADLITGFLNVLPLQAWDIT-YRFQGG-PVLCKIKY

Aretaon\_asperimus -----RKKKLTRMYFFILHLSIADLISGLLEVL**PQLAWDIT-YRF**QGG-PVLCKFVKY  
 Medauroidea\_extradentata -----RHKKLTRMYFFILHLSIADLITGLLNVL**PQLAWDIT-YRF**QGG-PVLCKIVKY  
 Ramulus\_arteris -----RRKKLTRMYFFILHLSIADLITGLLNVL**PQLAWDIT-YRF**QGG-PVLCKVVKF  
 Galloisiana\_yuasai -----ADLITAFNLV**PQLGWEIT-YRF**SGG-PVLCKAVKF  
 Athalia\_rosae P-----IRKKSSSRMYFFILHLSIADLITAFNLV**PQLGWEIT-YRF**QGG-PILCKLVKF

181

240

Varroa\_destructor1 LQVFLVLYLSTYVLGMAVDRYLAIIRSGIN-----  
 Metaseiulus\_occidentalis1 MQIFVLYLSTYTLVGLSLNSSLVVRSGSS-----  
 Metaseiulus\_occidentalis2 AQVYVLYLSTYILTGMSLDRLITMRAIESQWQTASLRRSDHDQSSDKSPQSHKIKFNNHR  
 Tigriopus\_californicus GQVMPYLYSSFILTLMVAVDRVGVTKRHGS-----  
 Anurida\_maritima LQIFVLYLSTYILISMTLDRYLTVVCHHSF-----SR  
 Meinertellus\_cundinamarcensis FQVMPYLYGSTYVLMFLAVDRYRAVCSAGP-----  
 Pogonognathellus\_sp LQIFVLYLSTYVLTSMVDRYLTVVCHHSF-----TR  
 Triops\_cancriformis GQIMPLYLSTYLLMFALDRYRAVCSASN-----N  
 Strigamia\_maritima2 LQVMVLYLSTYILVMMVAVDRYRAVCSASN-----I  
 Catajapyx\_aquilonaris FQVMVLYLSSYILMFMAVDRYKALCCD-A-----F  
 Daphnia\_pulex AQVMTLYLSTYILMFMAVDRYRAVCCR-N-----L  
 Daphnia\_magna3 -----  
 Daphnia\_magna2 TQIMTLYLSTYILMFMAVDRYRAVCCR-N-----L  
 Daphnia\_magna1 TQIMTLYLSTYILMFMAVDRYRAVCCR-N-----L  
 Daphnia\_magna4 TQIMTLYLSTYILMFMAVDRYRAVCCR-N-----L  
 Arachnocampa\_luminosa SQVFSVYASTFLLIVMAIDRFRCICWPIK-----S  
 Calanus\_finmarchicus LQMLGPYLSSFLLCVTSMDRYQAICKPFK-----T  
 Epiophlebia\_superstes LQLLGPYLSSYLLVAMALDRHRAVCRPLS-----A  
 Ladona\_fulva LQLLGPYLSSYLLVAMALDRHRAVCRPLS-----V  
 Cordulegaster\_boltonii LQLLGPYLSSYLLVMAIDRHRVAVCRPLS-----V  
 Diaphorina\_citri VHNVGSFLSSYILMAIAIDRYAICHPLT-----Y  
 Pachypsylla\_venusta VQPSGSFLSSYILMAIAIDRYAICQPLT-----Y  
 Acanthocasuarina\_muellerianae -----  
 Glomeris\_pustulata -----  
 Frankliniella\_cephalica -----  
 Machilis\_hrabei -----  
 Carabus\_granulatus -----  
 Dendroctonus\_frontalis -----ICYPLT-----Y  
 Lepeophtheirus\_salmonis GQMIGPYLSSYVLMVTAIDRYHAICFPFS-----K  
 Caligus\_rogercresseyi CQMIGPYLSSYVLMVTAIDRYHAICNPLS-----K  
 Parhyale\_hawaiensis GQLVGPYLNAYILVVTVAIDRYQVICRPLS-----N  
 Hyalella\_azteca GQLVGPYMNSSYLLVVTVAIDRYQVICRPLS-----N  
 Strigamia\_maritima1 GQLLGPYLSSYILVGMALDRYLAICFPLN-----  
 Conwentzia\_psociformis -----  
 Liposcelis\_bostrychophila G-----  
 Tetranychus\_urticae LQILGPYLSSFTLCATAIDRYAICFPLE-----S  
 Osmylus\_fulvicephalus S-----  
 Ornithodoros\_turicata -----SYLVVTAIDRYQAICFPLS-----N  
 Acerentomon\_sp MQIFGPYLSSYILVVTVAIDRYAICFPLQ-----N  
 Ixodes\_ricinus GQLLGPYLSSYLLVVTVAIDRYQAICFPLS-----N  
 Folsomia\_candida -----  
 Limulus\_polyphemus1 LQILGPYLSSYVLMVTAIDRYHAICFPLR-----N  
 Limulus\_polyphemus3 LQILGPYLSSYVLMVTAIDRYQAICFPLT-----R  
 Platynothrus\_peltifer5 LQILGPYLSSYILVITAIDRYQAICFPLS-----N  
 Platynothrus\_peltifer1 LQILGPYLSSYVLMVTSIDRYQAICYPLS-----N  
 Platynothrus\_peltifer3 LQILGPYLSSYVLMVTAIDRYQAICYPLS-----N  
 Achipteria\_coleoptrata2 LQIFGPYLSSYVLMVTAIDRYQAICNPLS-----N  
 Platynothrus\_peltifer2 MQILGPYLSSYVLMVTAIDRYQAICFPLS-----N  
 Platynothrus\_peltifer4 LQLFGPYLSSYVLMVTAIDRYQAICFPLT-----N  
 Ixodes\_scapularis2 GQLLGPYLSSYVLMVTAIDRYQAICFPLS-----N  
 Ixodes\_scapularis1 GQLLGPYLSSYVLMVTAIDRYQAICFPLS-----N  
 Ixodes\_scapularis3 GQLLGPYLSSYVLMVTAIDRYQAICFPLS-----N  
 Cotesia\_vestalis LQPFNGYLSSYVLTATAIDRYQAICNPFPS-----Y  
 Microplitis\_demolitor LQPFNGYLSSYVLTATAIDRYQAICYPFN-----Y  
 Zorotypus\_caudelli -----  
 Nasonia\_giraulti CQPLGSYLSSYVLIATAVDRYHAICYPLS-----Y  
 Nasonia\_vitripennis CQPLGSYLSSYVLIATAVDRYHAICYPLS-----Y  
 Varroa\_destructor2 AQVLVLYLSTYILTGMSLDRLVSM-----  
 Leuctra\_sp GQTLGPHLTAFLVATLWDRTHAFCY-----  
 Tricholepidion\_gertschi -----  
 Perla\_marginata GQALG-----  
 Crioscolia\_alcione GQPLGHLSSYILTAAIDRYQAICHPLS-----Y  
 Mischocyttarus\_flavitaris FQPLGHLSSYILTATAIDRYHAICHPLS-----Y  
 Polistes\_metricus FQPFGLYSSYILTATAIDRYHAICHPLS-----Y  
 Polistes\_canadensis FQPFGLYSSYILTATAIDRYHAICHPLS-----Y  
 Chrysis\_viridula MQPLGPYLSSYVLMATAIDRYHAICHPLS-----Y  
 Argochrysis\_armilla IQPLGPYLSSYV-MATAIDRYHAICHPLS-----Y  
 Chyphotes\_mellipes GQPLGPYLSSYVLMATAIDRYHAICHPLS-----Y  
 Brachycistis\_timberlakei GQPLGPYLSSYVLMATAIDRYHAICHPLS-----Y

Sphaerophthalma\_orestes IQPIGPYLSSYVLTATAIDRYHAICHPLS-----Y  
Homalodisca\_vitripennis GQTMGPYLSSYILVATALDRYKAICEPLN-----Y  
Cercopis\_vulnerata GQTLGPYLSSYVLMSTAMDRYKAICHPLT-----Y  
Nilaparvata\_lugens GQTLGPYLSSYVLMATAMDRYKAICHPLT-----Y  
Achipteria\_coleoptratal LQILGPYLSSYVLMVMTSIDRYQAICYPLT-----N  
Ephemera\_danica SLLLGPYLSSFVLVLTAVDRYEAIICRPLT-----Y  
Leptopilina\_clavipes GQPIGPYLSSYILTATAIDRYHAICFPFS-----Y  
Ganaspis\_sp VQPIGPYLSSYILTATAIDRYHAICFPFS-----Y  
Leptopilina\_boulardi GQPIGPYLSSYILTATAIDRYHAICFPFS-----Y  
Mantis\_religiosa GQTL-----Y  
Blattella\_germanica GQTLGPYLSAYILMVTALDRYQAVCHPLA-----Y  
Zootermopsis\_nevadensis GQTLGPYLSAYILMATALDRYQAVCHPLA-----Y  
Stigmatomma\_oregonense GQPFGLYLSSYILTVTAMDRYQAICHFPFS-----Y  
Dinoponera\_quadriceps GQPFGLYLSSYILTVAAVDRYQAICHFPFS-----Y  
Harpegnathos\_saltator GQPFGLYLSSYILTVTAMDRYQAICHFPFS-----Y  
Cerapachys\_biroi GQPFGLYLSSYILTVTAMDRYQAICHFPFS-----Y  
Monomorium\_pharaonis GQPFGLYLSSYILTVTAFDRYQAICHFPFS-----Y  
Tetramorium\_bicarinatum GQPFGLYLSSYILTVTALDRYQAICHFPFS-----Y  
Solenopsis\_invicta GQPFGLYLSSYILTVTIDRYHAICHFPFS-----Y  
Atta\_cephalotes GQPFGLYLSSYILTVTIDRYHAICHFPFS-----Y  
Acromyrmex\_echinatior GQPFGLYLSSYILTVTAMDRYHAICHFPFS-----Y  
Pogonomyrmex\_barbatus GQPFGLYLSSYILTVTIDRYQAICYPFS-----Y  
Wasmannia\_auropunctata GQPFGLYLSSYILTVTIDRYQAICHFPFS-----Y  
Vollenhovia\_emeryi GQPFGLYLSSYILTVTAMDRYQAICHFPFS-----Y  
Orussus\_abietinus GQPFGLYLSSYVLTATAIDRYRAICKPLD-----S  
Blaberus\_atropes -----S  
Limulus\_polyphemus2 MQILGPYLSSYVLLVTAIDRYQAICFPLT-----S  
Isonychia\_bicolor LQLLGPYLSSYILVLTAVDRFHAICLPLS-----Y  
Occasjapyx\_japonicus MQILGPYLSSYVLMVMTAIDRYQAICFPLS-----N  
Baetis\_sp GQILGPYLSSYILVLTAVDRYQAICQPLA-----H  
Panonychus\_ulmi LQLLGPYLSSFTLCATAIDRYRAICYPLE-----S  
Frankliniella\_occidentalis GQPLGVYLSSYVLTATAIDRYRAICHPLT-----Y  
Eurylophella\_sp GQLLGPYLSSYVLTAVDRYFAICRPLS-----Y  
Telenomus\_podisi GQPFGLYLSSYVLTAVDRYHAICHPLN-----Y  
Aposthonia\_japonica CQTLGPYLSSYVLLATAVDRYRAICSPLV-----Y  
Haploembia\_palau CQTLGPYLSSYVLLATAVDRYRAICSPLV-----Y  
Halyomorpha\_halys GQTLGPYLSSYVLTAVTALDRYQAICHPLT-----Y  
Stenobothrus\_lineatus GQPLGPYLSSYVLTAVTALDRHQAVCRPLT-----Y  
Inocellia\_crassicornis NQLLGPYLSAYILSATAIDRHQAICYPLT-----Y  
Tenthredo\_koehleri GQTLGPYLSSYVLAATAIDRYQAVRHPLI-----Y  
Corydalus\_cornutus AQPVGPYLSSYVLTATAIDRHQAICHPLT-----Y  
Chrysopa\_pallens GQPLGTYLSSYILSATAIDRHQAICYPLT-----Y  
Meloe\_violaceus GQTLGPYLSSYVLMATAIDRHQAICYPLT-----Y  
Aethina\_tumida GQTLGPYLSSYVLMATAIDRHQAICYPLT-----Y  
Gyrinus\_marinus GQTLGPYLSSYVLMATAIDRHQAICYPLT-----Y  
Tribolium\_castaneum GQTLGPYLSSYVLMATAIDRHQAICYPLT-----Y  
Microphorus\_vespilloides GQTLGPYLSSYILMATAIDRHQAICYPLT-----Y  
Aleochara\_curtula GQTLGPYLSSYILMATAIDRHQAICYP-----Y  
Pogonus\_chalceus CQTLGPYLSSYILMATAIDRHQAICYPLT-----Y  
Sipyloidea\_sipylus IQPLGPYLSSYVLLATALDRYQAICHPMT-----Y  
Extatosoma\_tiaratum LQPLGPYLSSYVLLATALDRYQAICHPMT-----Y  
Aretaon\_asperrimus FQPLGPYLSSYVLLATALDRYQAICQPM-----Y  
Medauroidea\_extradentata FQPLGPYLSSYVLLATALDRYQAICQPM-----Y  
Ramulus\_artemis FQPLGPYLSSYVLIATALDRYQAICHPMT-----Y  
Galloisiana\_yuasai GQTLGPYLSSYVLLATALDRFQAICHPLT-----Y  
Athalia\_rosae GQPLGPYLSSYVLMVTALDRYQAICHPLN-----Y

241

300

Varroa\_destructor1 ----RPIVVVRTILSVSWLVAAVLSPQL---YIFSFQKL----PNG----AH-DCWA  
Metaseiulus\_occidentalis1 ----STSSRLWVILGAGWFLSALLASPQV---YIFSFQKL----SNG----VY-DCWG  
Metaseiulus\_occidentalis2 CRV--GYRKFAKKLIVFAWFLAALSIPQL---FLFSYTRI----HDH--GSWY-DCKA  
Tigriopus\_californicus ----VEPKPLRPLIQGVWLVAAILCALPQP---FIFSIKDI----DDK---GIY-DCWA  
Anurida\_maritima NHY--GGLKSPKVMVAISWILSLIFASPQA---VIFSQSEI----RPG----VF-DCWT  
Meinertellus\_cundinamarcensis SPQ--AALKEARLMVCAAWILSIILAIPQA---LVFTHREI----APG----IQ-DCWA  
Pogonognathellus\_sp NHY--GGLRGPKILVILSWILSFIFASPQA---FIFSEKEL----TMNDQTKVY-DCWS  
Triops\_cancriformis LHW--NSLKVAKMMVTSAWVLSLLLAIPQA---IIFSEQYI----NPDGTTTET-DCWV  
Strigamia\_maritima2 GHW--NSLRAAKLMIVGAWVLAFLAAIPQA---IIFGKMEI----RPG----VH-DCWA  
Catajapyx\_aquilonaris SPW--NSLLAAKIMVASAWVMAFGFATPQA---VIFTLKKI----SPG----VQ-DCWG  
Daphnia\_pulex -HW--NSLKVAKCFVAASWVMALLFSIPQA---VIFHEEEI----SVG----VT-DCWV  
Daphnia\_magna3 -TW--NSRKVAKCFVAASWVMSMLFAIPQA---VIFHEEEI----SVG----VT-DCWV  
Daphnia\_magna2 -HW--NSLKVAKCFVAASWVMSMLFAIPQA---VIFHEEEI----SVG----VT-DCWV  
Daphnia\_magna1 -HW--NSLKVAKCFVAASWVMSMLFAIPQA---VIFHEEEI----SVG----VT-DCWV  
Daphnia\_magna4 -HW--NSLKVAKCFVAASWVMSMLFAIPQA---VIFHEEEI----SVG----VT-DCWV  
Arachnocampa\_luminosa CSW--NYR-HALVPVFFSWILAAVSSPQL---FLFKIQHM----SVQHY--TVETCSV  
Calanus\_finmarchicus CSW--EPK-NSDKLVGGAWVLAALCCIPQL---LIFNTSSQ----IGCNSGEMFEKQCT  
Epiophlebia\_superstes RVF--LPR-SPRRLVAIAWALSFLFSLPQA---FVFSYRRA----TE----TEW-DCWA



Ladona\_fulva RAF--LPR-SPRRLVAIAWALSALFSLPQA---FVFSYQKA-----TE----TEW--CWA  
 Cordulegaster\_boltonii RAF--LPR-SPRRLVAIAWALSFLFSLPQA---FIFSYRKA-----TE----TEW-DCWA  
 Diaphorina\_citri HTW--NSR-RSRIMITAWSTAFTCIPQI---TIFSYQEV-----KP----GIY-DCWA  
 Pachypsylla\_venusta HSW--NSR-RSRIMILIAWSAAFTFCIPQV-QISIFSYQEI-----KP----GVY-DCWA  
 Acanthocasuarina\_muellerianae -----  
 Glomeris\_pustulata -----  
 Frankliniella\_cephalica -----SIEP-----VE----GGY-DCWA  
 Machilis\_hrabei -----  
 Carabus\_granulatus -----  
 Dendroctonus\_frontalis CSW--TSR-RSKFMMYVAWIASLLCCIPQV---IIFSFQEV-----EP----RVY-DCWA  
 Lepeophtheirus\_salmonis CTW--TPK-RSNIMIGLAWLVSLALCVPQI---IIFGSGE-----KSH-SCSA  
 Caligus\_rogercresseyi CTW--TPK-RSNIMIGLAWLVSFALCIPQA---IIFGSSE-----AKY-SCSA  
 Parhyale\_hawaiiensis CRW--RPG-HSIRLIGAAATFLSLWLSVPQL---FIFSLRSK-----NG----IQ-DCWA  
 Hyalella\_azteca CRW--TPG-HSIRLISCATAISLLFSIPQL---FNFSFREK-----NG----IY-DCWA  
 Strigamia\_maritima1 -SW--AAT-RSKGMVCVAVVSVVFSPPQM---FLFSYKYV-----SV--L-KYW-ECWV  
 Conwentzia\_psociformis -----  
 Liposcelis\_bostrychophila -----  
 Tetranychus\_urticae RS---ALN-RSKLKVSIWGLLALICCLPQL---FIFSYRQI-----PN--SPGVY-ECWG  
 Osmylus\_fulvicephalus -----  
 Ornithodoros\_turicata CSW--TPT-KSKLMIAFAWVSLCCVPQL---FIFSYQQV-----EN----GVY-DCWG  
 Acerentomon\_sp SRW--TER-RYKAMIAVAWTATLCLCSPQV---FIFSYMKV-----GTNQSGDIY-DCWA  
 Ixodes\_ricinus CSW--TPT-KSKLLISAQVAVSLCCVPQV---FIFSYQEI-----SP----RVF-DCWG  
 Folsomia\_candida -----  
 Limulus\_polyphemus1 CVW--TPR-KSKLMIIAAWTISMLCCVPQV---FIFSYQKV-----LI-EP-ITF-DCWG  
 Limulus\_polyphemus3 CTW--TPR-RSKLMIVGAWIISILCCSPQA---FIFSYQQV-----SS-DP-LVF-DCWG  
 Platynothrus\_peltifer5 CSW--TPK-RSQLMISIAWVLSLIFCAPQL---FIFSYQQI-----PG-TLGNVY-DCWG  
 Platynothrus\_peltifer1 CAW--TPK-RSQLMISFAWIIALLCCIPQV---IIFSYQQI-----PG-YD--II-DCWG  
 Platynothrus\_peltifer3 CAW--SPT-RSKLMILMAWIVSLCCAPQI---IIFSYQEI-----G---S-QIF-DCWG  
 Achipteria\_coleoptrata2 CKW--TPG-RSKLMITIAWIVTSFCCSPQI---FIFSYQQI-----PG-TD-AIY-DCWG  
 Platynothrus\_peltifer2 CSW--TPR-RAKLMISCAWIIISIVCSLPQA---FIFSYQEV-----PE-TN-HIY-DCWG  
 Platynothrus\_peltifer4 CHW--TSR-KSKLMITIAWIIISILCSAPQA---FIFSYQEI-----PR-TN-GVR-DCWG  
 Ixodes\_scapularis2 CSW--SPT-RSKLMIVSAWAVTLCCVPQV---FIFSYQEI-----APGV-----F-DCWG  
 Ixodes\_scapularis1 CSW--TPT-KSKLLICAQVAVALLCCVPQV---FIFSYQEV-----SPEV----F-DCWG  
 Ixodes\_scapularis3 CSW--TPT-KSKLLISAQVAVSLCCVPQV---FIFSYQEI-----SPKV----F-DCWG  
 Cotesia\_vestalis CR-----  
 Microplitis\_demolitor CRT--SSL-KSRVMVYGAWSLSFVLCIPQV---IVFSYQEI-----SPGV----W-DCWA  
 Zorotypus\_caudelli -----  
 Nasonia\_giraulti CRT--TSR-RSRITVYVAVLLALLFCLPQV---FIFSYQEI-----SAGV----W-DCWA  
 Nasonia\_vitripennis CRT--TSR-RSRITVYVAVLLALLFCLPQV---FIFSYQEI-----SAGV----W-DCWA  
 Varroa\_destructor2 -----  
 Leuctra\_sp -----  
 Tricholepidion\_gertschi -----  
 Perla\_marginata -----  
 Crioscobia\_alcione -----  
 Mischocyttarus\_flavitaris -----  
 Polistes\_metricus CSS--TSR-KARIMLYSAWVVALVFCIPQI---FIFSYREI-----SPNV----W-DCWA  
 Polistes\_canadensis CSV--TSR-KSRIMVYCAWLSLILCIPQL---FVFSYQEI-----TPNI----W-DCWA  
 Chrysis\_viridula CSV--TSR-KSRIMVYCAWVSLILCIPQL---FVFSYQEV-----MPRI----W-DCWA  
 Argochrysis\_armilla CGS--SLK-RSKIMVYSAWAVTLILCIPQV---IVFSYQEV-----TPKV----W-DCWA  
 Chyphotes\_mellipes CGS--SLK-RSKIMVYSAWVALILCIPQV---VFSYQEV-----TPKV----W-DCWA  
 Brachycistis\_timberlakei CRT--TSK-RSRVMVYGAWIITLFLCIPQV---FIFSYQEI-----MPSV----W-DCWA  
 Sphaerophthalma\_orestes CST--TSR-RSRIMVYGAWVLLALLCIPQV---IVFSYKEV-----EQVQ----W-DCWA  
 Homalodisca\_vitripennis CST--TSR-RSRIMVYGAWVLLALLCIPQV---YVFSYEEI-----MPNV----W-DCWA  
 Cercopis\_vulnerata SNW--TSR-RSALTVSAWVSLTLLFCIPQVSVIIFSYQEI-----APGV----Y-DCWA  
 Nilaparvata\_lugens CSW--TSR-RSRMVRVAVIVSLILCIPQV---NIFSYQEI-----APGI----Y-DCWA  
 Achipteria\_coleoptrata1 CSW--TSH-HARSMVQCAWATALLFCIPQV---TIFSYMEVPG---SPGD----Y-DCWA  
 Ephemera\_danica CQW--TPT-RSKLMITLAWIIALLCCIPQV---LIFSYQQIP---GT----DIY-DCWG  
 Leptopilina\_clavipes CTW--PAR-RAWFLVAGAWTLALLCCAPQL---FVFSYRPVQQ---QPDV----F-DCWA  
 Ganaspis\_sp CRT--TSR-RSRIMVYSAWIIALLILCTPQV---FVFSYQLI-----SPGI----W-DCWA  
 Leptopilina\_boulardi CRT--TSR-RSRIMVYSAWIIALLILCTPQI---FIFSYQLI-----SPGV----W-DCWA  
 Mantis\_religiosa -----  
 Blattella\_germanica CSW--TSR-RSKFMVWTAWVVALGFCVPQ-----S-----  
 Zootermopsis\_nevadensis CSW--TSR-RSRAMVMAWVVALIFCIPQV-----S-----  
 Stigmatomma\_oregonense CRV--TSR-RSRMMVYGAWTLATILCIPQV---FIFSYQEI-----STGV----W-ECWA  
 Dinoponera\_quadriceps CSV--TSR-RSKMMVYVWVLLAVVLCVPQV---FIFSYQEI-----SPNV----W-DCWA  
 Harpegnathos\_saltator CNV--TSR-RSKMMVYAAWTLAVVLCVPQI---FIFSYQEI-----SPNV----W-ECWA  
 Cerapachys\_biroi CAV--TSR-RSKMMVYGAWVLAALILCVPQV---FVFSYKEI-----SPGV----W-ECWA  
 Monomorium\_pharaonis CGV--TSQ-RSKMMVYGAWVLAALILCVPQI---FIFSYMEI-----APDI----W-ECWA  
 Tetramorium\_bicarinarum CSV--TSR-RSKMMVYGAWVLSVALSVPQI---FIFSYTEI-----APGV----W-ECWA  
 Solenopsis\_invicta CGV--TSR-RSKMMVYGAWVLAALILCVPQI---FIFSYMEI-----SPGV----W-ECWA  
 Atta\_cephalotes CSV--TSR-RSKMMVYGTWMLAAMLCVPQI---FIFSYMEI-----SPGV----W-ECWA  
 Acromyrmex\_echinaior CSV--TSR-RSKMMVYGTWMLAAMLCVPQI---FIFSYMEI-----SPGV----W-ECWA  
 Pogonomyrmex\_barbatus CGI--TSR-RSKMMVYGAWMLAVILCIPQI---FIFSYTEI-----SPGV----W-ECWA  
 Wasmannia\_auropunctata CGV--TSR-RSKMMVYGAWMLAALCVPQI---FIFSYTEI-----SPGV----W-ECWA  
 Vollenhovia\_emoryi CGI--TSR-RSKMMVYGAWMLAALCVPQI---FIFSYTEI-----SPGV----W-ECWA  
 Orussus\_abietinus LDHRICTL-QSRNMIRCSWCLALLFSLPQV---FVFSYKEI-----SPGV----W-DCWA  
 Blaberus\_atropos -----

Limulus\_polyphemus2  
Isonychia\_bicolor  
Occasjapyx\_japonicus  
Baetis\_sp  
Panonychus\_ulmi  
Frankliniella\_occidentalis  
Eurylophella\_sp  
Telenomus\_podisi  
Aposthonia\_japonica  
Haploembia\_palau  
Halyomorpha\_halys  
Stenobothrus\_lineatus  
Inocellia\_crassicornis  
Tenthredo\_koehleri  
Corydalus\_cornutus  
Chrysopa\_pallens  
Meloe\_violaceus  
Aethina\_tumida  
Gyrinus\_marinus  
Tribolium\_castaneum  
Nicrophorus\_vespilloides  
Aleochara\_curtula  
Pogonus\_chalceus  
Sipyloidea\_sipylus  
Extatosoma\_tiaratum  
Aretaon\_asperimus  
Medauroidea\_extradentata  
Ramulus\_artemis  
Gallosiana\_yuasai  
Athalia\_rosae

CVW--TPR-KSKIMIANAWIISILCCFPQI---FIFSYQKVSE---DPVT----F-DCWG  
CTW--PAK-KAKLLVSGAWVLALLCCLPQV---LIFSYQPI-----TPGG--DVF-DCWA  
CSW--TPK-RSKVMGILSWVLSLMLFCAP-----  
CTW--PVR-RARALVCVAWALALACCTPQV---FIFSYQPIG-----DTY-DCWG  
RSR---LN-RSNLKVSIWGLLALICCLPQL---LIFSYHQIPN---NPQV----Y-ECWG  
CSW--TSR-RAKTMVAAWVAICFSAPQV---RSEGYTAGQRQTLEANSV-PCV-NCCN  
CTW--PAR-RARLLVSTWVLLALLFCLPQL---AVFSYQRVQNAPDKQDQ----Y-DCWA  
CRT--TSR-RSRFMVYAAWILAFLLCTPQA---YVFSFQEV-----WPGV----S-DCWA  
HSW--SFR-RAKIMVLIWIIISLWFCVPQA---VVFSYQEL-----EPGV----W-DCWA  
HSW--SFG-RAKVMVFIWITISLLFCLPQS---IIFSYQEL-----KPGV----W-DCWA  
CSW--SSK-RARGMIMGAWALSITFCTPQL---TIFSYQEV-----APGV----F-DCWA  
CSW--TYR-RSRAMQVAV-----  
CSW--TSR-CSRAMIWMAWASLAFCLPQL---IIFSYQEI-----EPNV----W-DCWG  
CSI--TSR-RSKMTVYPAWCLSLLLCVPQT---LVFSYKEV-----SSGV----W-DCWA  
CSW--TSR-RSKGMVYLAWLCSLIFCIPQV---FIFSYQIVP---DAPGV----Y-DCWA  
CSW--TSQ-RSQVMVTAWIIISLIFCIPQL---FIFSYQEV-----SPGI----W-DCWG  
CSW--TSR-RSKVMVYIAWCTSLIFCLPQL---FIFRYKEL-----SDGI----Y-DCWA  
CSW--TSR-RSKFMVYIAWITSLVFCIPQL---TIFSYQEV-----DDGE----F-DCWA  
CSW--TSR-RSKVMVYIAWVAALAFCLPQL---NIFSYQEI-----APGV----Y-DCWA  
CSW--TSR-RSKVMVYLAWCVSLAFCLPQL---TIFTYTSV-----GEDE----Y-DCWA  
CSW--TSR-RSRVMVYIAWVLSLAFCLPQI---TIFSYQHV-----ENEE----Y-DCWA  
-----  
CSW--TSR-RSKVMVYLAWATSLAFCLPQV---TIFAYQEV-----APGI----N-DCWA  
CSS--DSR-RSRVMIWMAWCVSLAFCLPQV---IIFSYQET-----VPGV----Y-DCWG  
CST--DSR-RSRVMVMAWCVSLAFCLPQV---IIFSYQET-----APGV----Y-DCWA  
CSS--DSR-RSRVMVMAWCVSLVFCIPQV---IIFSYQET-----EPGV----H-DCWA  
CST--DSR-RSRAMIWLAWCVSLVFCIPQV---IIFSYQET-----APGV----F-DCWA  
CST--DSR-RSRMIWLAWCVSLGFCIPQV---IIFSYQET-----ASGV----Y-DCWA  
CSW--TSR-RSRMTVWLAWAFS-----  
CSV--TSR-RSKIMVYLAWGLSLALCLPQL---VVFSYQEA-----SPGV----W-DCWG

Varroa\_destructor1  
Metaseiulus\_occidentalis1  
Metaseiulus\_occidentalis2  
Tigriopus\_californicus  
Anurida\_maritima  
Meinertellus\_cundinamarcensis  
Pogonognathellus\_sp  
Triops\_cancriformis  
Strigamia\_maritima2  
Catajapyx\_aquilonaris  
Daphnia\_pulex  
Daphnia\_magna3  
Daphnia\_magna2  
Daphnia\_magna1  
Daphnia\_magna4  
Arachnocampa\_luminosa  
Calanus\_finmarchicus  
Epiophlebia\_superstes  
Ladona\_fulva  
Cordulegaster\_boltonii  
Diaphorina\_citri  
Pachypsylla\_venusta  
Acanthocasuarina\_muellerianae  
Glomeris\_pustulata  
Frankliniella\_cephalica  
Machilis\_hrabei  
Carabus\_granulatus  
Dendroctonus\_frontalis  
Lepeophtheirus\_salmonis  
Caligus\_rogercresseyi  
Parhyale\_hawaiensis  
Hyalabella\_azteca  
Strigamia\_maritima1  
Conwentzia\_psociformis  
Liposcelis\_bostrychophila  
Tetranychus\_urticae  
Osmylus\_fulvicephalus  
Ornithodoros\_turicata  
Acerentomon\_sp  
Ixodes\_ricinus  
Folsomia\_candida  
Limulus\_polyphemus1  
Limulus\_polyphemus3  
Platynothrus\_peltifer5

301

360

TFEP-PITFRYVLFITAV-----  
TFDP-PLTSVRVYVFIAMA-----  
NFSWHRFQRIYTYFVLI-----  
DFGGEKWEKGYVVTFLFTV-----  
FL--GPSGVKAYVTWVVISV-----  
DFPGGQQGAKIYVLFVVIWV-----  
TFIE-PWGVRYVTWVVCV-----  
RFIE-PWGAKEYVTWVVISI-----  
HFEQ-PWGEKAYVTWVLSI-----  
TFVE-PWGTKAYVTWVVISI-----  
QFVE-PWGAKAYVTWV-----V  
QFAE-PWGAKEYVTWV-----V  
QFAE-PWGAKEYVTWVVSIFGAPLLVVAVCYXXXXXXXXXXWVQFAEPWGAKEYVTWV-----V  
QFAE-PWGAKEYVTWV-----V  
QFAE-PWGAKEYVTWV-----V  
KWLS-KKHEGLYLLFHMSTQ-----  
NFPT-WVTPSQYILYFSFAN-----  
TFEP-PWTQKAYVTWYGISV-----  
TFDP-PWTQKAYVTWYGISV-----  
TFDP-PWTQKAYVTWYGISV-----  
SWDQ-EWGERAYVTWFSITV-----  
SWDQ-EWGERIYITWFSVSV-----  
-----  
TFVP-EWGQRAYVTWYTCV-----  
-----  
TFDN-EWGEQAYVVCYSVTV-----  
TFAQ-DWGQKAYVTWFAVSN-----  
SFVV-DWGQKAYVTWFAVSN-----  
SFIQ-PWGVVAYVTWYFYSIAV-----  
DFIP-GWGVTAAYVTWYIAV-----  
DFTL--EEERAYVTWYFVAN-----  
-----  
TFIQ-PYGERLYVTWYALTS-----  
-----  
TYAE-PWGVTAAYVTWYGVSV-----  
TFIE-PWGAKEYVTWYAFVI-----  
TYVE-PWGLRAYVTWYGVSV-----  
-----  
VFIQ-PWGEKAYVVLWYALSQ-----  
TFIQ-PWGEKAYVVLWYALSQ-----  
IFPQ-PYGERIYVTWYAITV-----

|                            |                            |
|----------------------------|----------------------------|
| Platynothrus_peltifer1     | TFPQ-PFGERIYVSWYAISF-----  |
| Platynothrus_peltifer3     | TFSQ-PYGERIYVTWYAVSV-----  |
| Achipteria_coleoptrata2    | TFQK-PWGERIYVTWYAVSV-----  |
| Platynothrus_peltifer2     | TFPQ-PWGERIYVTWYAISV-----  |
| Platynothrus_peltifer4     | TFPQ-PYGERIYVTWYAITV-----  |
| Ixodes_scapularis2         | TFA-QPWGLRAYVTWYSVSV-----  |
| Ixodes_scapularis1         | TYV-ESWGLRAYVTWYGMSV-----  |
| Ixodes_scapularis3         | TYV-EPWGLRAYVTWYGVS-----   |
| Cotesia_vestalis           | -----                      |
| Microplitis_demolitor      | SFS-LPYGERIYVTWYSITI-----  |
| Zorotypus_caudelli         | -----                      |
| Nasonia_giraulti           | TFT-VPYGERAYVTWYSVTV-----  |
| Nasonia_vitripennis        | TFT-VPYGERAYVTWYSVTV-----  |
| Varroa_destructor2         | -----                      |
| Leuctra_sp                 | -----                      |
| Tricholepidion_gertschi    | -----                      |
| Perla_marginata            | -----                      |
| Crioscolia_alcione         | TFD-LPYGERAYVTWYAVTV-----  |
| Mischocyttarus_flavitaris  | TFD-IKFGERAYVTWYSLMV-----  |
| Polistes_metricus          | TFD-IKFGEKAYVTWYSLMV-----  |
| Polistes_canadensis        | TFD-IQFGEKAYVTWYSLMV-----  |
| Chrysis_viridula           | VFN-VAYGERIYVTWYSTMV-----  |
| Argochrysis_armilla        | VFD-VAYGERIYVTWYSTMV-----  |
| Chyphotes_mellipes         | TFD-PTYGEKAYVTWYSITV-----  |
| Brachycistis_timberlakei   | TFD-LEYGERAYVTWYSVTV-----  |
| Sphaerophthalma_orestes    | TFG-LHYGERAYVTWYSVTV-----  |
| Homalodisca_vitripennis    | TFP-FPWGERVYVTWYSVSV-----  |
| Cercopis_vulnerata         | TFP-EPWGEKLYVTWYSVSV-----  |
| Nilaparvata_lugens         | TFP-RDWGERAYVTWYSVSV-----  |
| Achipteria_coleoptrata1    | TFPLQPYGERIYVTWYAISF-----  |
| Ephemera_danica            | TFE-PWGERAYVSWYATS-----    |
| Leptopilina_clavipes       | TFT-VPYQEAAYVTWYSISV-----  |
| Ganaspis_sp                | TFK-MPYQEAAYVTWYSISV-----  |
| Leptopilina_boulardi       | TFT-VPYQEAAYVTWYSISV-----  |
| Mantis_religiosa           | -----                      |
| Blattella_germanica        | -----                      |
| Zootermopsis_nevadensis    | -----                      |
| Stigmatomma_oregonense     | IFY-LKYGERAYITWYSVTQ-----  |
| Dinoponera_quadriceps      | TFN-VKYGERSYVTWYSVTQ-----  |
| Harpegnathos_saltator      | TFH-LKYGERAYITWYSVTQ-----  |
| Cerapachys_biroi           | TFY-LKYGERAYITWYSVTQ-----  |
| Monomorium_pharaonis       | TFY-MPYGERAYITWYSVTQ-----  |
| Tetramorium_bicarinarum    | TFY-LKYGERAYITWYSVMQ-----  |
| Solenopsis_invicta         | TFY-LKYGERAYITWYSVTQ-----  |
| Atta_cephalotes            | IFY-LKYGERAYITWYSVMQ-----  |
| Acromyrmex_echinator       | TFY-LKYGERAYITWYSVMQ-----  |
| Pogonomyrmex_barbatus      | TFY-LKYGERAYITWYSIMQ-----  |
| Wasmannia_aurouncata       | TFY-LKYGERAYITWYSVTQ-----  |
| Vollenhovia_emoryi         | TFN-LKYGERAYITWYSVTQ-----  |
| Orussus_abietinus          | TFE-LSYGERAYVTWYCLAV-----  |
| Blaberus_atropos           | -----                      |
| Limulus_polyphemus2        | IFI-QPWGEKVYVVLWYAVSQ----- |
| Isonychia_bicolor          | TFP-PYWGERAYVSWYTVSV-----  |
| Occasjapyx_japonicus       | -----                      |
| Baetis_sp                  | TFP-EGWGERAYVTWYSGSV-----  |
| Panonychus_ulmi            | TFI-QPYGERLYVTWYAFSS-----  |
| Frankliniella_occidentalis | LFI-----                   |
| Eurylophella_sp            | TFQ-PAWGERAYVTWYAGSV-----  |
| Telenomus_podisi           | TFN-LPYGERIYVTWYSVTV-----  |
| Aposthonia_japonica        | TFI-KPWGERAYVTWYSVFS-----  |
| Haploembia_palaui          | TFI-QPWGERTYITWYSVFA-----  |
| Halyomorpha_halys          | VFS-EPYGERVYVTWYSISV-----  |
| Stenobothrus_lineatus      | -----                      |
| Inocellia_crassicornis     | TFP-EPWGAQAYVTWYSLSI-----  |
| Tenthredo_koehleri         | TFDLTPYQQTYVTWYSISV-----   |
| Corydalus_cornutus         | TFS-ETWGEKAYVTWY-----      |
| Chrysopa_pallens           | TFP-EKWGEKTYVTWYSISV-----  |
| Meloe_violaceus            | VFE-EPWGAQAYVTWYSISV-----  |
| Aethina_tumida             | TFQ-EPWQKAYVIWYCVSV-----   |
| Gyrinus_marinus            | TFP-QAWGQKAYVTWYGLSV-----  |
| Tribolium_castaneum        | TFQ-EPWQKAYVTWYSISV-----   |
| Nicrophorus_vespilloides   | TFL-PAWGEKAYVTWYGISV-----  |
| Aleochara_curtula          | -----                      |
| Pogonus_chalceus           | TFP-QPWGARAYVTWYSISV-----  |
| Sipyloidea_sipylus         | TFA-SDWGETTYVTWYSVSV-----  |
| Extatosoma_tiaratum        | TFA-GHWGERTYVTWYSVSV-----  |
| Aretaon_asperimus          | TFV-EKWGERTYVTWYSISV-----  |

Medauroidea\_extradentata  
Ramulus\_artemis  
Gallosiana\_yuasai  
Athalia\_rosae

TFP-EAWGEKTYVTWYSVSV-----  
TFS-GAWGETTYVTWYSVSV-----  
-----  
TFY-SPLGERAYVTWFSISA-----

361

420

Varroa\_destructor1  
Metaseiulus\_occidentalis1  
Metaseiulus\_occidentalis2  
Tigriopus\_californicus  
Anurida\_maritima  
Meinertellus\_cundinamarcensis  
Pogonognathellus\_sp  
Triops\_cancriformis  
Strigamia\_maritima2  
Catajapyx\_aquilonaris  
Daphnia\_pulex  
Daphnia\_magna3  
Daphnia\_magna2  
Daphnia\_magna1  
Daphnia\_magna4  
Arachnocampa\_luminosa  
Calanus\_finmarchicus  
Epiophlebia\_superstes  
Ladona\_fulva  
Cordulegaster\_boltonii  
Diaphorina\_citri  
Pachypsylla\_venusta  
Acanthocasuarina\_muellerianae  
Glomeris\_pustulata  
Frankliniella\_cephalica  
Machilis\_hrabei  
Carabus\_granulatus  
Dendroctonus\_frontalis  
Lepeophtheirus\_salmonis  
Caligus\_rogercresseyi  
Parhyale\_hawaiensis  
Hyaella\_azteca  
Strigamia\_maritima1  
Conwentzia\_psociformis  
Liposcelis\_bostrychophila  
Tetranychus\_urticae  
Osmylus\_fulvicephalus  
Ornithodoros\_turicata  
Acerentomon\_sp  
Ixodes\_ricinus  
Folsomia\_candida  
Limulus\_polyphemus1  
Limulus\_polyphemus3  
Platynothis\_peltifer5  
Platynothis\_peltifer1  
Platynothis\_peltifer3  
Achipteria\_coleoptrata2  
Platynothis\_peltifer2  
Platynothis\_peltifer4  
Ixodes\_scapularis2  
Ixodes\_scapularis1  
Ixodes\_scapularis3  
Cotesia\_vestalis  
Microplitis\_demolitor  
Zorotypus\_caudelli  
Nasonia\_giraulti  
Nasonia\_vitripennis  
Varroa\_destructor2  
Leuctra\_sp  
Tricholepidion\_gertschi  
Perla\_marginata  
Crioscolia\_alcione  
Mischoctytarus\_flavitaris  
Polistes\_metricus  
Polistes\_canadensis  
Chrysis\_viridula  
Argochrysis\_armilla  
Chyphotus\_mellipes  
Brachycistis\_timberlakei  
Sphaerophthalma\_orestes

--LFIPVTLMLALCYTYLSWII-----  
--LIVPALIMGACYSYLCRAS-----  
--LGVVVMMLFCYIQICLIIVRIQRHH--MTKTTTAPAN-----  
--FFLPFIVITSSYCIYTYRIWYSYRAT--QGSKASPQMSLAS-----NR-VVLSS  
--FLLPLLICGYSYGAICFKVVSFSLHE--SNNRKLNEV-SR-----  
--FMAPLTVIAACYGIIISLKVWFSSPQ--STTAEPLAA-----  
--FILPLVIIGASYGAICCKVVSFNLPN--ES-----  
--FALPLLIIGISYGAISLRLWRYSQEA--HRSEEMTRGHKRT-----IGLP-AGA  
--FIIPLLIVIAASYGFCYTLWIYDEEH--GRSGDVI-----AL-----R-----  
--FVMPLLVISSSYGAIYRIWYTNSEP--RCWT-----  
SIFGAPLLVIGVYCYGVICRQIWIYSQSA--LPSSQQPPTSSAY-----P--ALTSE  
SIFGAPLLVVAVCYGVICRQIWIYSQSA--QPSLLPS-DNSAI-----PSHSSITE  
SIFGAPLLVVAVCYGVICRQIWIYSQSA--QPSLLPS-DNSAI-----PSHSSITE  
SIFGAPLLVVAVCYGVICRQIWIYSQSA--QPSLLPS-DNSAI-----PSHSSITE  
SIFGAPLLVVAVCYGVICRQIWIYSQSA--QPSLLPS-DNSAI-----PSHSSITE  
--FLIPLFVLTFLYSRIFMTVSKNIKQK--HASIRFERESSKTATEINQLNQENSLNTQ  
--FFIPLLILLFSNCFICKTIWASSNLLNWNRRRTTKENKM-----  
--FAVPLVLLLAYAGICSVLRRNHREK--TRPHDERFLS-----RG-----  
--FAVPLVLLLAYAGICRALRRNHREK--LRPQEDGLIP-----RG-----  
--FAVPLVLLLAYAGICRALRRNHREK--MRPQQDGIIP-----RG-----  
--FIIPFLVLYTYTTCICVALWQNTTYP-----  
--FIIPLICLIYTYTTCICLAL--KNTAYP-----  
-----  
--FMIPLTVLLFTYSRICCEIWRSSASK--HAPALVDGTC-----KTCPHV-----  
-----  
--FIIPFLVLYTYTTCICREIWRCSOSS--LRPRSM-----  
--FFLPLIILICYGICICKCIWDFNSK--IPLNPGVEVR-----SITCKNKGRAE  
--FFFPLIILICYGRICKTIWDFNSK--VPMSSD--AG-----GVTCCGNRGRAE  
--FFVPLIILVFFSVCIATLLRHNQV--PIQCNYIRQSYST--TSVHCLHHSPL--  
--FFIPLVLLIFFSGCICCALLRYNFQV--PNQSSYVSRSHSQ--AGQESPNNETTS--  
--TFVPLLVLYTYSAICWAVWRNFRHK--KNSPKGDFDS-----AASSPPT-----  
-----  
--FFIPFVILIFTFSNICLELWRNGRI--KK-----  
-----  
--FFVPLAVLTFTYIYICRAIWHNLYLK--RKSSEGSRDK-----  
--FIIPLLVLIYTYFNICRTIWRSKNWI--STKVSPVKRC-----VKVSQLYEDGGA--  
--FFVPLAVLSFTYVVICRSIWRNLYLK--RKSSDAESWK-----  
-----  
--FFIPLIVITFTCVRICKNVWYFNHLR--GK-----  
--FFIPLLVITFTYVNVTKTVWNNYLR--KK-----  
--FVIPCIIILFAHVCICREICNNLHRK--RESIEEIKNC-----IHYSFKRN-----  
--FFVFPILLTFTYVICREIWRNVHQK--RKSVMKQNK-----IIQNDDS-----  
--FIIPFIILTFTYVICREIWLNLHKK--RKSFKINRNK-----SSSSCNNR-----  
--FIIPFIIIVTTHYHICREIWLNLHKK--RKSFKLNKNR-----  
--FFIPLVILTFTYIYICREIWRNLYLK--RQTGRRETQT-----INQIDNS-----  
--FFIPLIIITTYVYICREIWRNVRRK--RQTLKPEISL-----IEVRKNW-----  
--FFVPLAVLSFTYVVICRSIWRNLYLK--RKSSDAD-----  
--FFVPLMVLFTYVVICRSIWRNLYLK--RKSSDAES-----  
--FFVPLVLSFTYVVICRSIWRNLYLK--RKSSDAES-----  
-----  
--FLLPFLVLLTYASICANIRRNTEIS--DRFDHVN-----  
-----  
--FLLPFCVLTFTYAEICCSIWRNREVM--VLASHER-----  
--FLLPFCVLTFTYAEICCSIWRNREVM--VLASHER-----  
-----  
-----TRGRP--VIHQGAT-----  
-----  
--FLLPFAILLTYVVICIGIWRSSNIL--GATDNRK-----  
--FLLPFIIVLVTYVVICVGVWQSNKMS--DAVDDRK-----  
--FLLPFIIVLVTYVVICVGVWQSNKMS--GAVDDRT-----  
--FLLPFIIVLVTYVVICVGVWQSNKMS--GAVDDRA-----  
--FLLPFTVLLTYTGTICIGIWRSNKMS--GVEDWRK-----  
--FLLPFTVLLTYTGTICIGIWRSNKMT--SAENWRK-----  
--FLLPLIVLTYTGTICIGIYKSNRMS--GVNDVRK-----  
--FLLPLIVLTYVVICVGVWQSNKMT--GMVDVIG-----  
--FLLPLVLLTYTGTICIGIWRSNKMT--GIMDVKI-----

Homalodisca\_vitripennis --FLVPLFVLIYTYFCICWTLWRYSGLP--DS-S-----  
Cercopis\_vulnerata --FLIPLCVLIYTYTTCICRELRNAGFP--ESTS-----  
Nilaparvata\_lugens --FILPLIVLIYTYWCICRELRNAGFP--VTKA-----  
Achipteria\_coleoptrata --FFIFPILLTATHVCICREIW-----  
Ephemera\_danica --FLVPLMVLVYAYFRICQALWRNYNLK--QRAQONGL-----  
Leptopilina\_clavipes --FLLPFTVLVYTYTGICIGVWKNNGSVS--DPLEIGYK-----  
Ganaspis\_sp --FLLPFTVLIYTYTGICIGVWKNNGSVS--DPLEIGFA-----  
Leptopilina\_boulardi --FLLPFTVLVYTYTGICIGVWKNNGSVS--DPLEIGYK-----  
Mantis religiosa -----  
Blattella\_germanica -----  
Zootermopsis\_nevadensis -----  
Stigmatomma\_oregonense --FLLPFAVLVYTYVRCISVWTSNKMS--RVIDL-----  
Dinoponera\_quadriceps --FLLPFIVLVYTYTRICITIWTSNKMS--GVVDL-----  
Harpegnathos\_saltator --FLLPFIVLAYTYMRCISIWASSKIS--GVVDF-----  
Cerapachys\_biroi --FLLPFIVLVYTYTQICRSIWTSNKMS--GVVDF-----  
Monomorium\_pharaonis --FLIPFIVLIYTYTKICVSIWTSNKIS--GIVDF-----  
Tetramorium\_bicarinarum --FLLPFVLVLYTYTKICMAIWTSNKMS--GVVDL-----  
Solenopsis\_invicta --FLIPFIALTYTYTKICVSIWTSNKMS--GVIDL-----  
Atta\_cephalotes --FLLPFIVLVYTYTRICISIWRSKLS--GLIDL-----  
Acromyrmex\_echinator --FLLPFIVLVYTYTRICISIWRSKLS--GLIDL-----  
Pogonomyrmex\_barbatus --FLLPFIVLVYTYTRICMSIWTSNKMS--GVVDL-----  
Wasmannia\_auropunctata --FLLPFMVLVYTYTRICLSIWRSKMS--GVVEL-----  
Vollenhovia\_emoryi --FLLPFIVLVYTYTRICMSIWTSNKMS--GVVDL-----  
Orussus\_abietinus --FLLPLCVLVYTYSGICRVRRRSEVG--VATSKS-----  
Blaberus\_atropos -----  
Limulus\_polyphemus2 --FFIPLVVIIFTYIRICKSVWYNLQMR--RQASNC-----  
Isonychia\_bicolor --FLAPLLILFPTYTCICRAIWHNYNAK--KIASDGFT-----  
Occasjapyx\_japonicus -----  
Baetis\_sp --FLIPLLILIFTYTCICQAIWRNYNAK--KESVAGLP-----  
Panonychus\_ulmi --FFIPFTIIIFTFSNICSELWKN-----  
Frankliniella\_occidentalis -----  
Eurylophella\_sp --FLVPLAILVYAYLVCICFAIWRNYNNK--KQFSAQGI-----  
Telenomus\_podisi --FVLPYCVLIYTYTGICIGIWNNGLS--GLPNSS-----  
Aposthonia\_japonica --FIIPLSVLTYTYSCICRKIWRNTGAG--FHII-----  
Haploembia\_palaui --FIIPLSVLTYTYSCICRKIWRNTGAG--FHII-----  
Halyomorpha\_halys --FVVPLVSLIYTYTICLTIWHNTGPL--SASA-----  
Stenobothrus\_lineatus -----  
Inocellia\_crassicornis --FIIPLCVLVFTYTCICREIWRNTARHG--ILRPATP-----  
Tenthredo\_koehlerii --FILPLIILVYTYTSCICIVIWNNGIV--GEAR--S-----  
Corydalus\_cornutus -----  
Chrysopa\_pallens --FIIPLSILVFTYTRICCEIWRNANIG--MPLR--A-----  
Melo\_violaceus --FIVPLIVLVYTYTSCIEIWHSSSESS--L--R--P-----  
Aethina\_tumida --FIVPLIVLVYTYTCKDIWHSSSEIS--M--R--P-----  
Gyrinus\_marinus --FIVPLTVLTYTYGICREIWHSSAAAG--DLGG--P-----  
Tribolium\_castaneum --FMVPLVLLIFTYTYTSCIEIWHSSSESS--L--R--P-----  
Microphorus\_vespilloides --FIIPLVLLVYTYTSCICREIWHSAVGE--LGMR--P-----  
Aleochara\_curtula -----  
Pogonus\_chalceus --FIVPLIVLIFTYGAICRVIWQSAGGE--LGLR--S-----  
Sipyloidea\_sipylus --FIVPLCVLVYTYSCICHEIWEKSGFR--AAHA-----  
Extatosoma\_tiaratum --FIVPLCVLVFTYTRICHEIWEKSGFR--AAHA-----  
Aretaon\_asperimus --FVIPLCVLVYTYSCICREIWEKSGFR--AAHA-----  
Medauroidea\_extradentata --FIIPLCVLVYTYTRICHEIWEKSGFR--AAHA-----  
Ramulus\_artemis --FIIPLCVLVYTYSCICHEIWEKSGFR--AAHA-----  
Galloisiana\_yuasai -----  
Athalia\_rosae --FILPLLVLGYTNVSICLAIWRNTGIA--GEAR--G-----

421

480

Varroa\_destructor1 -----  
Metaseiulus\_occidentalis1 -----  
Metaseiulus\_occidentalis2 -----FG-----  
Tigriopus\_californicus VGDGS-----KNE-----  
Anurida\_maritima -----YSKNRSR-----  
Meinertellus\_cundinamarcensis -----ICCARCKRSSK-----  
Pogonognathellus\_sp -----  
Triops\_cancriformis AGAAL--RPTSQRWRRASRLGRFFLQRER-----AT--HQRNCS-----G-----  
Strigamia\_maritima2 -----A-----VGNGTGG-----  
Catajapyx\_aquilonaris -----ASKWK-----WL--DLKKCLCCTRKESGR-----  
Daphnia\_pulex TGSTL-----SVMRRWILRASLR-----WQ--KSRSSSNGTKNHSIAI-----  
Daphnia\_magna3 TGSTL-----SVMRRWFLRAGMR-----WQ--KSRNSNSNAIKNNS-----  
Daphnia\_magna2 TGSTL-----SVMRRWFLRAGMR-----WQ--KSRNSNSNAIKNNS-----  
Daphnia\_magna1 TGSTL-----SVMRRWFLRAGMR-----WQ--KSRNSNSNAIKNNS-----  
Daphnia\_magna4 TGSTL-----SVMRRWFLRAGMR-----WQ--KSRNSNSNAIKNNS-----  
Arachnocampa\_luminosa NGLITEVKHSDNSIFRDKKFGILWWIRSRFNKGIHKLIFTS'TKKRGNKIKFGKTGNFL-----  
Calanus\_finmarchicus -----  
Epiophlebia\_superstes -----  
Ladona\_fulva -----

|                               |            |               |                   |
|-------------------------------|------------|---------------|-------------------|
| Cordulegaster_boltonii        | -----      | -----         | -----             |
| Diaphorina_citri              | -----      | -----         | -----             |
| Pachypsylla_venusta           | -----      | -----         | -----             |
| Acanthocasuarina_muellerianae | -----      | -----         | -----             |
| Glomeris_pustulata            | -----      | -----         | -----             |
| Frankliniella_cephalica       | -----      | -----         | -----             |
| Machilis_hrabei               | -----      | -----         | -----             |
| Carabus_granulatus            | -----      | -----         | -----             |
| Dendroctonus_frontalis        | -----      | -----         | -----             |
| Lepeophtheirus_salmonis       | EGTIR----- | YR-WKSTK----- | RALGSTAEYSKRNDTI  |
| Caligus_rogercresseyi         | EGMIR----- | YR-WKSSK----- | RSRNNQNEV--HQNTE  |
| Parhyale_hawaiensis           | -----      | K-----        | V-----YHHRGNM     |
| Hyaella_azteca                | -----      | R-----        | K-----YGRTLDDT    |
| Strigamia_maritima1           | -----      | -----         | -----             |
| Conwentzia_psociformis        | -----      | -----         | -----             |
| Liposcelis_bostrychophila     | -----      | -----         | -----             |
| Tetranychus_urticae           | -----      | -----         | -----             |
| Osmylus_fulvicephalus         | -----      | -----         | -----             |
| Ornithodoros_turicata         | -----      | -----         | -----             |
| Acerentomon_sp                | -----      | K-----        | KHRGCNGFY--       |
| Ixodes_ricinus                | -----      | -----         | -----             |
| Folsomia_candida              | -----      | -----         | -----             |
| Limulus_polyphemus1           | -----      | -----         | -----             |
| Limulus_polyphemus3           | -----      | -----         | -----             |
| Platynothrus_peltifer5        | -----      | K-----        | EFSTS-SLKSTSLTSTF |
| Platynothrus_peltifer1        | -----      | D-----        | RVSSCS----STNDSI  |
| Platynothrus_peltifer3        | -----      | N-----        | DKLDCSVNSPETSEH   |
| Achipteria_coleoptrata2       | -----      | -----         | -----             |
| Platynothrus_peltifer2        | -----      | N-----        | SY-----S          |
| Platynothrus_peltifer4        | -----      | -----         | -----G            |
| Ixodes_scapularis2            | -----      | -----         | -----             |
| Ixodes_scapularis1            | -----      | WKGER-----    | -----             |
| Ixodes_scapularis3            | -----      | WKGSR-----    | -----             |
| Cotesia_vestalis              | -----      | -----         | -----             |
| Microplitis_demolitor         | -----      | -----         | -----             |
| Zorotypus_caudelli            | -----      | -----         | -----             |
| Nasonia_giraulti              | -----      | -----         | -----             |
| Nasonia_vitripennis           | -----      | -----         | -----             |
| Varroa_destructor2            | -----      | -----         | -----             |
| Leuctra_sp                    | -----      | -----         | -----             |
| Tricholepidion_gertschi       | -----      | -----         | -----             |
| Perla_marginata               | -----      | -----         | -----             |
| Crioscolia_alcione            | -----      | -----         | -----             |
| Mischocyttarus_flavitaris     | -----      | -----         | -----             |
| Polistes_metricus             | -----      | -----         | -----             |
| Polistes_canadensis           | -----      | -----         | -----             |
| Chrysis_viridula              | -----      | -----         | -----             |
| Argochrysis_armilla           | -----      | -----         | -----             |
| Chyphotes_mellipes            | -----      | -----         | -----             |
| Brachycistis_timberlakei      | -----      | -----         | -----             |
| Sphaerophthalma_orestes       | -----      | -----         | -----             |
| Homalodisca_vitripennis       | -----      | -----         | -----             |
| Cercopis_vulnerata            | -----      | -----         | -----             |
| Nilaparvata_lugens            | -----      | -----         | -----             |
| Achipteria_coleoptrata1       | -----      | -----         | -----             |
| Ephemera_danica               | -----      | -----         | -----             |
| Leptopilina_clavipes          | -----      | -----         | -----             |
| Ganaspis_sp                   | -----      | -----         | -----             |
| Leptopilina_boulardi          | -----      | -----         | -----             |
| Mantis_religiosa              | -----      | -----         | -----             |
| Blattella_germanica           | -----      | -----         | -----             |
| Zootermopsis_nevadensis       | -----      | -----         | -----             |
| Stigmatomma_oregonense        | -----      | -----         | -----             |
| Dinoponera_quadriceps         | -----      | -----         | -----             |
| Harpegnathos_saltator         | -----      | -----         | -----             |
| Cerapachys_biroi              | -----      | -----         | -----             |
| Monomorium_pharaonis          | -----      | -----         | -----             |
| Tetramorium_bicarinatum       | -----      | -----         | -----             |
| Solenopsis_invicta            | -----      | -----         | -----             |
| Atta_cephalotes               | -----      | -----         | -----             |
| Acromyrmex_echinatior         | -----      | -----         | -----             |
| Pogonomyrmex_barbatus         | -----      | -----         | -----             |
| Wasmannia_auropunctata        | -----      | -----         | -----             |
| Vollenhovia_emoryi            | -----      | -----         | -----             |
| Orussus_abietinus             | -----      | -----         | -----             |
| Blaberus_atropos              | -----      | -----         | -----             |
| Limulus_polyphemus2           | -----      | -----         | -----             |



|                            |                                                            |
|----------------------------|------------------------------------------------------------|
| Platynothis peltifer3      | --RSGTRLLVTVGKS--YRFKGGQVEVSVE-----K----                   |
| Achipteria coleoptrata2    | -----VGKS--YRFKSRGKLEVSVD-----K----                        |
| Platynothis peltifer2      | --RTRKCLLIALLNRV---YRLGRRQDTETAEIQI-----NCDNQEVRLHTVV----- |
| Platynothis peltifer4      | -----KLSKSSDDKSRLQSD-----RC-----                           |
| Ixodes scapularis2         | -----                                                      |
| Ixodes scapularis1         | -----AYRFRGLAHN-----                                       |
| Ixodes scapularis3         | -----AYRFGTAQN-----                                        |
| Cotesia vestalis           | -----                                                      |
| Microplitis demolitor      | -----                                                      |
| Zorotypus caudelli         | -----                                                      |
| Nasonia giraulti           | -----                                                      |
| Nasonia vitripennis        | -----                                                      |
| Varroa destructor2         | -----                                                      |
| Leuctra sp                 | -----                                                      |
| Tricholepidion gertschi    | -----VGQ-----                                              |
| Perla marginata            | -----                                                      |
| Crioscolia alcione         | -----                                                      |
| Mischocyttarus flavitarsis | -----                                                      |
| Polistes metricus          | -----                                                      |
| Polistes canadensis        | -----                                                      |
| Chrysis viridula           | -----                                                      |
| Argochrysis armilla        | -----                                                      |
| Chyphotes mellipes         | -----                                                      |
| Brachycistis timberlakei   | -----                                                      |
| Sphaerophthalma orestes    | -----                                                      |
| Homalodisca vitripennis    | -----                                                      |
| Cercopis vulnerata         | -----                                                      |
| Nilaparvata lugens         | -----                                                      |
| Achipteria coleoptrata1    | -----                                                      |
| Ephemera danica            | -----LQP-N-----                                            |
| Leptopilina clavipes       | -----                                                      |
| Ganaspis sp                | -----                                                      |
| Leptopilina boulandi       | -----                                                      |
| Mantis religiosa           | -----                                                      |
| Blattella germanica        | -----                                                      |
| Zootermopsis nevadensis    | -----                                                      |
| Stigmatomma oregonense     | -----                                                      |
| Dinoponera quadriceps      | -----                                                      |
| Harpegnathos saltator      | -----                                                      |
| Cerapachys biroi           | -----                                                      |
| Monomorium pharaonis       | -----                                                      |
| Tetramorium bicarinatum    | -----                                                      |
| Solenopsis invicta         | -----                                                      |
| Atta cephalotes            | -----                                                      |
| Acromyrmex echinatior      | -----                                                      |
| Pogonomyrmex barbatus      | -----                                                      |
| Wasmannia auropunctata     | -----                                                      |
| Vollenhovia emeryi         | -----                                                      |
| Orussus abietinus          | -----                                                      |
| Blaberus atropos           | -----                                                      |
| Limulus polyphemus2        | -----                                                      |
| Isonychia bicolor          | -----TK-----                                               |
| Occasjapyx japonicus       | -----                                                      |
| Baetis sp                  | -----PTDSK-----                                            |
| Panonychus ulmi            | -----                                                      |
| Frankliniella occidentalis | -----                                                      |
| Eurylophella sp            | -----HHQH-----                                             |
| Telenomus podisi           | -----                                                      |
| Aposthonia japonica        | -----                                                      |
| Haploembia palaui          | -----                                                      |
| Halyomorpha halys          | -----                                                      |
| Stenobothrus lineatus      | -----                                                      |
| Inocellia crassicornis     | -----PMSV-----                                             |
| Tenthredo koehleri         | -----                                                      |
| Corydalus cornutus         | -----                                                      |
| Chrysopa pallens           | -----MS-----                                               |
| Meloe violaceus            | -----RS-----                                               |
| Aethina tumida             | -----RNSL-----                                             |
| Gyrinus marinus            | -----                                                      |
| Tribolium castaneum        | -----RS-----                                               |
| Nicrophorus vespilloides   | -----RNVQ-----                                             |
| Aleochara curtula          | -----                                                      |
| Pogonus chalceus           | -----PRLA-----                                             |
| Sipyloidea sipyulus        | -----                                                      |
| Extatosoma tiaratum        | -----                                                      |
| Aretaon asperimus          | -----                                                      |
| Medauroidea extradentata   | -----                                                      |



Ramulus\_artemis  
Gallosiana\_yuasai  
Athalia\_rosae

-----  
-----  
-----

Varroa\_destructor1  
Metaseiulus\_occidentalis1  
Metaseiulus\_occidentalis2  
Tigriopus\_californicus  
Anurida\_maritima  
Meinertellus\_cundinamarcensis  
Pogonognathellus\_sp  
Triops\_cancriformis  
Strigamia\_maritima2  
Catajapyx\_aquilonaris  
Daphnia\_pulex  
Daphnia\_magna3  
Daphnia\_magna2  
Daphnia\_magna1  
Daphnia\_magna4  
Arachnocampa\_luminosa  
Calanus\_finmarchicus  
Epiophlebia\_superstis  
Ladona\_fulva  
Cordulegaster\_boltonii  
Diaphorina\_citri  
Pachyphylla\_venusta  
Acanthocasuarina\_muellerianae  
Glomeris\_pustulata  
Frankliniella\_cephalica  
Machilis\_hrabei  
Carabus\_granulatus  
Dendroctonus\_frontalis  
Lepeophtheirus\_salmonis  
Caligus\_rogercresseyi  
Parhyale\_hawaiiensis  
Hyalella\_azteca  
Strigamia\_maritima1  
Conwentzia\_psociformis  
Liposcelis\_bostrychophila  
Tetranychus\_urticae  
Osmylus\_fulvicephalus  
Ornithodoros\_turicata  
Acerentomon\_sp  
Ixodes\_ricinus  
Folsomia\_candida  
Limulus\_polyphemus1  
Limulus\_polyphemus3  
Platynocheilus\_peltifer5  
Platynocheilus\_peltifer1  
Platynocheilus\_peltifer3  
Achiapteria\_coleoptrata2  
Platynocheilus\_peltifer2  
Platynocheilus\_peltifer4  
Ixodes\_scapularis2  
Ixodes\_scapularis1  
Ixodes\_scapularis3  
Cotesia\_vestalis  
Microplitis\_demolitor  
Zorotypus\_caudelli  
Nasonia\_giraulti  
Nasonia\_vitripennis  
Varroa\_destructor2  
Leuctra\_sp  
Tricholepidion\_gertschi  
Perla\_marginata  
Crioscobia\_alcione  
Mischocyttarus\_flavitaris  
Polistes\_metricus  
Polistes\_canadensis  
Chrysis\_viridula  
Argochrysis\_armilla  
Chyphotus\_mellipes  
Brachycystis\_timberlakei  
Sphaerophthalma\_orestes  
Homalodisca\_vitripennis

541

600

-----SKRSLSHTKLNPTRMTMVMVIVFLCWTPFCCAQLY  
-----SKRLMSDAKLKTRMTMVMVIVFLCWTPFCCAQLY  
-----VN----TAGFFESNRRITKAKVRMVKMTFTVVLCFVWSPYSIAELL  
RP---NLAHNSHAPTGGFVRVQTEQIVLLSKAKRKSLSMTAIVSVCFAVCWLPWCVTMLL  
APTPK-----DVGSRRLAQQISEVKIKTLKLTLLVVLCCFFVWSPFCVTLQLI  
RP-----IQSRNTSQRSSARLSRARMRTLRLTLAVVACFIICWAPFCVSQLV  
-----GK-KIKMEFPPLRRSNSHRITRAKIKTIQTLTLLVVISFVVCWAPFCITQLV  
-----TDS-CRLYSRRVAGVSNPNP ISEAKVKTLKLTFLVVVCFVWSPFCITQLV  
-----AGRL-KSKVG-CNVQKRKSMISDAKIKTLQTLVAVVICFFVWAPFCIAQLI  
RSLPPPLSPQC-CQQMP-LRRSNSNQNRITKAKMKTIKLTLAVVLCFVACWAPFCITQLI  
LPQPPPAAPQR-CQQMS-LRRSNSNQNRITKAKMKTIKLTLAVVLCFVACWAPFCITQLI  
LPQPPPAAPQR-CQQMS-LRRSNSNQNRITKAKMKTIKLTLAVVLCFVACWAPFCITQLI  
LPQPPPAAPQR-CQQMS-LRRSNSNQNRITKAKMKTIKLTLAVVLCFVACWAPFCITQLI  
LPQPPPAAPQR-CQQMS-LRRSNSNQNRITKAKMKTIKLTLAVVLCFVACWAPFCITQLI  
-----S---KSFKSNFPIRQTFSGKALTRSKIKTLKLTLLVTVVITYVMCSLPHYVCTFI  
-----KSKLSVQNLFRSTSVMSRAKIKSVKLTLLV IACYILCSPFIVGQLL  
-----APPRTHSVGTISKAKMKTLLRITVAVACYILCSPFVLSQLW  
-----APPRTHSMGTISRAKMRTLRLITVAVACYILCSPFVLSQLW  
-----APLRTHSMGTISRAKMRTLRLITVAVACYILCSPFVLSQLW  
-----TTSPHKIISRAKINTIKQTIIVAVITLYIVCSLPIFVQLW  
-----APSPHKIISRAKINTVKQTIIVAVITLYIICSLPIFAQLW  
-----KIISRAKINTVKQTIIVAVITLYIICSLPIFAQLW  
-----KTVKLTVVVILSYIACSMPYISAMLW  
-----FAYARSQQQATQRTNPLISRAKINTVKQTVLVIAIYIICSAFPIVQLW  
-----GISRAKIKTVKLTVVVIVGYIACSAPFICAEWL  
-----SRAKINTVKQTIIVAVITLYIICSAFPIVQLW  
-----SKQSTKRDRVPLISRAKINTVKQTIIVAVITLYIICSAFPIVQLW  
-----QTKNKKSLKPRTHSIQGISRAKIKTIKLTVVVIAGYIACSAPFICVQLW  
-----QKQKRSLKPRSHSIQGISRAKIKTIKLTVVVIVGYIACSAPFICVQLW  
-----QKMKQNSLSMKKQVRVSRIMSPISRAKIKTVKLTLLVIFVACSAFPIVQLW  
-----CR----YRFQKTPGAKTVMSPIISRAKIKTIKLTLLVIFVACSAFPIVQLW  
-----RF----KASESVNPRSHGLQRISRAKIKTVKLTVVVITCYILCSPMYTCAMMW  
-----ANLSQSHSTAYFSKAKIKTVKLTVTIIICYICSSPFFNVQIW  
-----ANGSFVAPRSHSVRGLSRAKIKTVKITVVVIVGYIACSAPFICVQMW  
-----EN----SEILDMAMRST-----IVPV-----TEPQPVTQQS  
-----TK----QDSSFVGPVGRSHSVRGLSRAKIKTVKITVVVIALYVVCSSPFFICVQMW  
-----NSSRSHSMRGLSRAKIKTVKITVVVIVGYIACSAPFICVQMW  
-----NFIHCRSVPDLISRAKIKTVKITVVVIVGYIACSAPFICVQMW  
-----VK----VNLDNSTPRSHSLRFVSRAKIKTVKITVVVILCYIICSSPFFICVQMW  
-----PK----SR-GTYNPRSHSLNGLSRAKIKTVKITVVVILCYIICSSPFFICVQMW  
-----DC----GKEDYNPRSHSLNGLSRAKIKTVKITVVVILCYIICSSPFFICVQMW  
-----DF----KE--DFSPRTHSIHGLSRAKIKTVKITVVVILCYIICSSPFFICVQMW  
-----TF----QESVSSSPRVNTFNRLSRAKIKTVKITVVVILCYIICSSPFFICVQMW  
-----LANNLLNPRSHSIYRISRAKIKTVKITVVVIVGYIACSAPFICVQMW  
-----HSVRGMSRAKIKTVKITVVVIALYVVCSSPFFICVQMW  
-----GTKQDSSFVGPVGRSHSVRGLSRAKIKTVKITVVVIALYVVCSSPFFICVQMW  
-----GTKQDSSF-----TVKITVVVIALYVVCSSPFFICVQMW  
-----NNKKINFNNKNRQPLISRAKIKTVKITVVVIVGYIACSAPFICVQMW  
-----QQALTKEGRSQTTLISRAKIKTVKITVVVIVGYIACSAPFICVQMW  
-----QQALTKEGRSQTTLISRAKIKTVKITVVVIVGYIACSAPFICVQMW  
-----ADVRPAPVNPRTSHSMKGISRAKIKTVKITVVVIVGYIACSAPFICVQMW  
-----IKG--DVFEKNRSTFVSKALISSVKQTIIVVTVLTVGSPFICGQLW  
-----YIRS-ISSCTRNRSFISKAMINTVKQTIIVAVITLYAITSPFICGELW  
-----YIRS-ISNYSRNRSSFISKAMINTVKQTIIVAVITLYAITSPFICGELW  
-----YIRS-ISNYSRNRSSFISKAMINTVKQTIIVAVITLYAITSPFICGELW  
-----KVRNNGNFLERNRSPFISKAMINTMRQTIIVVIVGYIACSAPFICGQLW  
-----KSRNSVNLERNRSPFISKAMINTMRQTIIVVIVGYIACSAPFICGQLW  
-----SVKG-KKSFQNRTPLVSKAMINTVKQTIIVAVITLYAITSPFICGQLW  
-----RGGKSGKLEGNRSPFISKAMINTVRQTIIVAVITLYAITSPFICGQLW  
-----RAKG-SNLPNRNRSPFISRAMINTVKQTIIVAVITLYAITSPFICGQLW  
-----SPHLLISRAKINTIKQTVAVILLYIACSAPFICVQLW

Cercopis\_vulnerata -----SPHRLISRAKINTIKQTVAVIALYISCSSPFICAQLW  
Nilaparvata\_lugens -----SPHRLISRAKVNTVKQTVAVIALYVACSSPFIVAQLW  
Achipteria\_coleoptratal -----  
Ephemera\_danica -----FHFYPRIPMEPRTHSLRGISRAKLRSIKLTIIVVIACVVICSTPFIGAQLW  
Leptopilina\_clavipes -----KNSNI IKKKAKS INNKGSKYDETNCCC-----  
Ganaspis\_sp -----KNSHFTKKKQSPLITKARVNTMKQTIIVVVTLYFLTWSPFIGCELW  
Leptopilina\_boulardi -----KNSNI IKKKQSPLITKARVNTMKQTIIVVVTLYFLTWSPFIGCELW  
Mantis\_religiosa -----  
Blattella\_germanica -----  
Zootermopsis\_nevadensis -----  
Stigmatomma\_oregonense -----KKGSKDNFLQRNRDPFISNALINTVKQTIIVVVTLYIVTSPFIGCELW  
Dinoponera\_quadriceps -----RKGNKASFSQRNRDPFISKALINTVKQTIIVVILYIVTSTPFIGCQLW  
Harpegnathos\_saltator -----KK---ASFSQRNRDPFISKALINTVKQTIIVVVTLYIVTSPFIGCQLW  
Cerapachys\_biroi -----KQGNKASFSLRNRDPFISKALINTIKQTIIVVVSPLYIITSIPFIGCELW  
Monomorium\_pharaonis -----KKGNKANFSQRNRDPLISKAMINTIKQMIIVVVTLYIITNTPFIGCELW  
Tetramorium\_bicarinarum -----KKNRASFQRNRDPLISKAMINTVKQMIIVVVTLYIITNTPFIGCELW  
Solenopsis\_invicta -----KKGNKASFCQRNRDPLISKAMINTVKQMIIVVVTLYIITNTPFIGCELW  
Atta\_cephalotes -----KKS NKVSFCQRNRDPLISKAMINTVKQMIIVVVTLYIVTNTPFIGCELW  
Acromyrmex\_echinator -----KRSNKISFCQRNRDPLISKAMINTVKQMIIVVVTLYIVTNTPFIGCELW  
Pogonomyrmex\_barbatus -----KRRNKASFSQRNRDPLISKAMINTVKQMIIVVVTLYIITNTPFIGCELW  
Wasmannia\_auropunctata -----KRDNKASFCQRNRDPLISKAMINTVKQMIIVVVTLYIVTNIPIFIGCELW  
Vollenhovia\_emoryi -----KRSNKASFFQRNRDPLISKAMINTVKQTIIVVVTLYILTNSPFIGCELW  
Orussus\_abietinus -----PRGDIRAPATISRAKIRTAWQTIIVVVTLYIASSTPFIGCELW  
Blaberus\_atropos -----NTVKQMVAVLFLYVACSAFPIISAQLW  
Limulus\_polyphemus2 -----ETFTVPRSHCMRGLSRSKVKTFKITVVTITCYIICSTPFIIVQLW  
Isonychia\_bicolor -----QTNIQPRVHSIRGISRAKIKTVKLTVVVIACVVIACSSPFISAQLW  
Occasjapyx\_japonicus -----  
Baetis\_sp -----VLGNG-RVMHPRVHSMRGISRAKMKTIKLTVVVIACVVICSTPFIGAQLW  
Panonychus\_ulmi -----  
Frankliniella\_occidentalis -----  
Eurylophella\_sp -----I--VRNMNPRVHSIRGISRAKMKTIKLTVVVIACVVICSTPFIGAQLW  
Telenomus\_podisi -----KNANFRGDNANLITKARIKTVKQTIIVVVTLYIITNTPFIGCELW  
Aposthonia\_japonica -----QTSPVISRAKINTVKQMVIVILFYIICSTPFTFSLW  
Haploembia\_palaui -----KSSPVISRAKINTVKQMVIVIFFYIICSTPFTC----  
Halyomorpha\_halys -----PHKVVSRAKINTIKQTVAVIALYIACSLPFIISAQLW  
Stenobothrus\_lineatus -----  
Inocellia\_crassicornis -----TTAPTHGVPVRGRRTQPFVSRKINTVKQTVAVIVTVIVCSMPFIISAQLW  
Tenthredo\_koehlerii -----T--HGGLLRQRTVISRAKINSIKQMIIVVVTLYIITNTPFIGCELW  
Corydalus\_cornutus -----  
Chrysopa\_pallens -----SP--PCTPKRRAPLISRAKINTVKQTVAVIILYIACSSPFISAQLW  
Meloe\_violaceus -----SQKAGKRTPLISRAKINTVKQTIIVVVTLYIITNTPFIGCELW  
Aethina\_tumida -----VKG-----KRTKMPLISRAKINTVKQTIIVVVTLYIITNTPFIGCELW  
Gyrinus\_marinus -----  
Tribolium\_castaneum -----SQ--KSAPGKRTPLISRAKINTVKQTIIVVVTLYIITNTPFIGCELW  
Microphorus\_vespilloides -----TGNGK--SQQTGKRAPLISRAKINTVKQTIIVVVTLYIITNTPFIGCELW  
Aleochara\_curtula -----  
Pogonus\_chalceus -----PDSPP--RCARSRRAPLISRAKINTVKQTVAVIAMIACSTPFIGAQLW  
Sipylloidea\_sipylus -----A--RSSPLKMNPTISRAKINTVKQTVAVIVLYIACSSPFISAQLW  
Extatosoma\_tiaratum -----A--RSSPLKMNPTISRAKINTVKQTVSVIVLYIACSSPFISAQLW  
Aretaon\_asperimus -----A--RSSPLKMNPTISRAKINTVKQTVAVIVLYIACSSPFISAQLW  
Medauroidea\_extradentata -----A--RSSPLKINPTISRAKINTVKQTVAVIVLYIACSSPFISAQLW  
Ramulus\_artemis -----A--RSSPLKMNPTISRAKINTVKQTVAVIMLYIACSSPFISAQLW  
Gallosiana\_yuasai -----  
Athalia\_rosae -----T--DGTLRLRQGSVISRAKINSIKQMVAVISFYAASSPFIIVQLW

|                               | 601                | CXNPW motif                   | 660                      |
|-------------------------------|--------------------|-------------------------------|--------------------------|
| Varroa_destructor1            | LES-T----          | GQ--VPSIFITLFL--VPNL-----     | NSCANPWVCLTFSTTLRRLKLTDA |
| Metaseiulus_occidentalis1     | LVF-G----          | GE--EASTFVTMCLM--VPNL-----    | NSCANPWVYLSFSTDLRRLVNF   |
| Metaseiulus_occidentalis2     | LAY-KIAG--         | GE--HVSPPFMVFL--LASL-----     | NSVNPWIYTAFTNSF----      |
| Tigriopus_californicus        | MSF-DIQV--         | GGD--KVHPLMVFAL--LASL-----    | NSITNPNWIYLCFSSAVLQVVKHL |
| Anurida_maritima              | LVY-NPTL--         | -----PVGPGNVIILL--LPSL-----   | NSCTNPWIYLAFAFSELCNQLRVF |
| Meinertellus_cundinamarcensis | YNF-NPPT--         | DQK--QMSGVTVI--LASL-----      | NSCTNPWLYLAFSGSLLNHLRVC  |
| Pogonognathellus_sp           | -----              | -----                         | -----                    |
| Triops_cancriformis           | LVY-DPPS--         | N-----                        | -----                    |
| Strigamia_maritima2           | LTF-NPPS--         | PDA---QTGSVEVILL--LASL-----   | NSCTNPWIYVAFSGSLLNQLRMC  |
| Catajapyx_aquilonaris         | LVY-NPPE--         | DR---DVDPVTVILL--LASL-----    | NSCTNPWIYVAFSGSLLNQLRV   |
| Daphnia_pulex                 | MVY-CPPT--         | SQA---DVSPVAVILL--LASL-----   | NSCSNPWIYLAFAFSGSLLNQMRC |
| Daphnia_magna3                | MVY-CPPT--         | SQA---DVSPVAVILL--LASL-----   | NSCSNPWIYLAFAFSGSLLNQMRC |
| Daphnia_magna2                | MVY-CPPT--         | SQA---DVSPVAVILL--LASL-----   | NSCSNPWIYLAFAFSGSLLNQMRC |
| Daphnia_magna1                | MVY-CPPT--         | SQA---DVSPVAVILL--LASL-----   | NSCSNPWIYLAFAFSGSLLNQMRC |
| Daphnia_magna4                | MVY-CPPT--         | SQA---DVSPVAVILL--LASL-----   | NSCSNPWIYLAFAFSGSLLNQMRC |
| Arachnocampa_luminosa         | HFLGLSAHNHSSLFTK-- | TLVYI--TISTNMLFQLNSCANP       | IIYLFNNGICKLAKRL         |
| Calanus_finmarchicus          | ATL-GPPH--         | IRSKIGLQ--MEPLFW--LMTL-----   | NSVNPWIYIWFNRNRLFVRQTS   |
| Epiophlebia_superstes         | VTW-YPGA--         | TESSFWRG--AAFTILSL--MSCL----- | NSCVNPWIYMAFNEDIRVALKER  |
| Ladona_fulva                  | ATW-YPGA--         | TESSFWRG--AAFTILSL--LPCL----- | NSCVNPWIYMAFNEDIRVALKER  |
| Cordulegaster_boltonii        | ATW-YPGA--         | TESPFWRG--AAFTILSL--LPCL----- | NSCVNPWIYMAFNEDIRVALKER  |

Diaphorina\_citri QTW-NLNQ-TVYPVFQDNAVLTIIML-LSSL-----NSCVNPWIYLVSNRELI AALRTL  
 Pachypsylla\_venusta ETW-NLNQ-TVYPVFQDSA-LTIIML-LSSL-----NSCVNPWIYLVSNRELITALWTL  
 Acanthocasuarina\_muellerianae QTW-NLNE-SFYPVFQDNAVLTIIML-LSSL-----NSCVNPWIYLFNSRKLITALRTL  
 Glomeris\_pustulata LVW-YPEA-RNTPFGRS-AAFTILAL-LASL-----NSCANPWIYLCFNENVAQTLGDV  
 Frankliniella\_cephalica AAW-GNA---DNPFFQG-RYMTILTL-LFSL-----NSCVNPWIYLA FNNDLVRMLWLL  
 Machilis\_hrabei AAW-DPNA-VHSSFWQG-PAFTILTL-LASL-----NSCVNPWLYLVFNPNLVRDRFRHG  
 Carabus\_granulatus ATW-DPE----STFLNG-AAYTILTL-LYSL-----NSCVNPWIYLA FNRELPRLLLRH  
 Dendroctonus\_frontalis ATF-DPK----SAFLEG-STFTILTL-LYSL-----NSCVNPWIYLFNRELPRLLLRH  
 Lepeophtheirus\_salmonis VTF-GTVT-ESIRK-----  
 Caligus\_rogercresseyi -----  
 Parhyale\_hawaiensis SVW-DPNA-KNSPFSSG-E-----  
 Hyalella\_azteca SVW-DP-----  
 Strigamia\_maritima1 VAY-DKRA-QETAFYKG-GLFPVLVL-VASL-----NSCVNPWVYLLFNKNLVTLRHY  
 Conwentzia\_psociformis -----  
 Liposcelis\_bostrychophila -----  
 Tetranychus\_urticae AYW-APGA-QESSLWRG-PLITIAML-LPSL-----NSCVNPWIYLFNRLNLLSTLDKL  
 Osmylus\_fulvicephalus -----  
 Ornithodoros\_turicata MYW-SPDA-ESSELWSS-STVTILML-LNSL-----NSCVNPWIYLA FNKNLLNALRTA  
 Acerentomon\_sp ISF-FQSV-SS-----TSS-A-LPVTRTTSNTSSCESTSVH-----  
 Ixodes\_ricinus MYW-SPDA-DMADTWTN-TAGSSVTQ-AEGSYIRCGKTKCRNVFSSLLSTSNV---GKQF  
 Folsomia\_candida -----  
 Limulus\_polyphemus1 AYW-SPYA-QTSPWKG-PTVAILML-LASL-----NSCVNPWIYLA FNHNLTALKHI  
 Limulus\_polyphemus3 AYW-SPYA-QNSPIWKG-PTVAILML-LASL-----NSCVNPWIYLA FNHNLTALKQL  
 Platynothrus\_peltifer5 VYW-FPSA-QSFFQTS---ELSNII-----  
 Platynothrus\_peltifer1 AYW-WPNA-QNSTFWG-KCSENSFI-IQFR-----YS----FQ-----  
 Platynothrus\_peltifer3 AYW-WPNA-QQSPIWNV-KYTYSNN-FA-----  
 Achipteria\_coleoptrata2 AYW-VPTA-QKSHIWNV-KYTYNIYL-MFFS-----IIDVTIAFKILYSE-----  
 Platynothrus\_peltifer2 AYW-WPNA-STTFWNG-MFSLFII-----  
 Platynothrus\_peltifer4 AYW-YPSA-QETSFWTG-KH-----  
 Ixodes\_scapularis2 MYW-SPD-VDLADVWIN-ATVTILML-LNSL-----NSCVNPWVYLLFNRLVHTLRHQ  
 Ixodes\_scapularis1 MYW-SPH-VDANPWIS-E-----  
 Ixodes\_scapularis3 MYW-SPD-AD-----  
 Cotesia\_vestalis -----  
 Microplitis\_demolitor ATW-DPQ-AANSSIFNG-PAFTILTL-MSSL-----TSCVNPWIYLFNRELRLNLSNY  
 Zorotypus\_caudelli -----  
 Nasonia\_giraulti ATW-DPF-ASSSAFFDG-PIFTILSL-LSSL-----TSCVNPWIYLFNRELRAALTKF  
 Nasonia\_vitripennis ATW-DPF-ASSSAFFDG-PIFTILSL-LSSL-----TSCVNPWIYLFNRELRAALTKF  
 Varroa\_destructor2 -----  
 Leuctra\_sp -----  
 Tricholepidion\_gertschi ATW-DPN-ASKSPFWTG-TTFTIFTL-LASL-----NSCVNPWIYLFNRLVRLNQQV  
 Perla\_marginata -----  
 Crioscolia\_alcione ATW-DPR-AISSPFFSG-AAFTILTL-LSSL-----TSCVNPWIYLFNRELRAALTDY  
 Mischocyttarus\_flavitaris1 VTW-DTE-AIKSSFANG-PAFTILTL-LNSL-----TSCVNPWIYLFNRELRLQNLNMY  
 Polistes\_metricus ISW-DPE-APKSSFANG-PAFTILAL-LNSL-----TSCVNPWIYLFNRELRLQNLNMY  
 Polistes\_canadensis VSW-DTK-AFESSFANG-PAFTILAL-LNSL-----TSCVNPWIYLFNRELRLQNLNMY  
 Chrysis\_viridula ATW-DPS-ASSSFING-PAFTILSL-LSSL-----TSCVNPWIYLFNRELRAVLKDN  
 Argochrysis\_armilla ATW-DPS-ASSSPFITG-PAFTILSL-LSSL-----TSCVNPWIYLFNRELRSALKDN  
 Chyphotes\_mellipes ATW-YPK-ATVSPFFSG-ATFTILAL-LSSL-----TSCVNPWIYLFNRELRLVTDY  
 Brachycistis\_timberlakei ATW-DPK-AAFSPFFTG-AAFTILAL-LSSL-----TSCVNPWIYLFNRELRLALKEY  
 Sphaerophthalma\_orestes ATW-DPK-ASSPFFSG-PAFTILAL-LSSL-----TSCVNPWIYLFNRELRLALMDY  
 Homalodisca\_vitripennis ASW-GPR---QPFFDG-AAFTILSL-LSSL-----NSCVNPWIYLFNRELRLSLWRA  
 Cercopis\_vulnerata ASW-DPN-ALSSPFFLG-ATFTILTL-LS-----  
 Nilaparvata\_lugens AVW-DPG-AVHSPFFQG-ATFTILSL-LSSL-----NSCVNPWIYLVSNKELMRGLRQL  
 Achipteria\_coleoptrata1 -----  
 Ephemera\_danica ATW-DPE-AMQSPFWG-PTFTIVTL-LASL-----NSCVNPWIYLA FNPELARLLITR  
 Leptopilina\_clavipes -----  
 Ganaspis\_sp MAW-DPIRANSSIFDG-PLFTVLSL-LSCL-----TSCVNPWIYMAFNSELRIILLNF  
 Leptopilina\_boulardi MAW-DPVRANSSIFDG-PLFTVLSL-LSCL-----TSCVNPWIYIAFNSELRIILLNF  
 Mantis\_religiosa -----  
 Blattella\_germanica -----  
 Zootermopsis\_nevadensis -----  
 Stigmatomma\_oregonense ATW-DPK-ASTSPFFSG-ATFTILSL-LNSL-----TSCVNPWIYFTFNSELRLVAVTNF  
 Dinoponera\_quadriceps ATW-DPG-AATSPFHT--AAFTILCL-LNSL-----TSCINPWIYFAFNRELRSALTNL  
 Harpegnathos\_saltator ATW-DRP-AAISPFLLTG-AAFTILCL-LNSL-----TSCVNPWIYFAFNRELRLVAVTNF  
 Cerapachys\_biroi ATW-DPK-ASTSPFFTG-AAFTILSL-LNSL-----TSCVNPWIYFAFNRELRAALTNF  
 Monomorium\_pharaonis ATW-DPK-ASSPFFTG-AAFTILSL-LNSL-----TSCVNPWIYFAFNKELRMALINF  
 Tetramorium\_bicarinatum ATW-DPT-ASSPFFSG-AAFTILSL-LNSL-----TSCVNPWIYFAFNKELRGALTSS  
 Solenopsis\_invicta ATW-NPK-ASSSPFITG-AAFTILSL-LNSL-----TSCVNPWIYFAFNKELRALTNF  
 Atta\_cephalotes ATW-DPK-ASTSPFFTG-AAFTILSL-LNSL-----TSCVNPWIYFAFNKELRVALTCF  
 Acromyrmex\_echinatior ATW-DPK-ASTSPFFTG-AAFTILSL-LNSL-----TSCVNPWIYFAFNKELRVALTCF  
 Pogonomyrmex\_barbatus ATW-DPK-ASTSPFFTG-AAFTILSL-LNSL-----TSCVNPWIYFAFNKELRTALTNF  
 Wasmannia\_auropunctata ATW-DPK-ASTSPFFTG-AAFTILSL-LNSL-----TSCVNPWIYFAFNKELRAALTNF  
 Vollenhovia\_emoryi ATW-DPT-ASSPFFTG-AAFTILSL-LNSL-----TSCVNPWIYFAFNKELRAALTNF  
 Orussus\_abietinus ATW-DPG-ASSSAFLNG-PAFTILAL-LSSL-----NSCVNPWVHLGFDPELREVILRH  
 Blaberus\_atropos ATW-DDL-AHTRPFFSG-TAFTILAL-LYSL-----NSCMNPWIYLFNRELIRFLTQQ  
 Limulus\_polyphemus2 AYW-SPN-AKNSSIWKG-PTVAILML-LASL-----NSCVNPWIYLA FNYNLVTALREV  
 Isonychia\_bicolor ATW-DPM-AMHS-----

|                            |                                                              |
|----------------------------|--------------------------------------------------------------|
| Occasjapyx_japonicus       | -----                                                        |
| Baetis_sp                  | ATW-DPD-AMQSPFWG-TQPTTHLSMFLL-----HHAR-----                  |
| Panonychus_ulmi            | -----                                                        |
| Frankliniella_occidentalis | -----                                                        |
| Eurylophella_sp            | -----                                                        |
| Telenomus_podisi           | AVW-SDT-AASSPFITG-PAFTILSL-LSSL-----TSCVNPWIYLTFFNYELRKILLKR |
| Aposthonia_japonica        | ATW-DVT-AVELPFFFG-PAFTILTTL-LSSL-----NSCVNPWIYLTFNKELIALLVNC |
| Haploembia_palau           | -----                                                        |
| Halyomorpha_halys          | ATW-DPH-ATSSPFLSG-GTFTILTTL-LSSL-----NSCVNPWIYLTNSQDLMEALWET |
| Stenobothrus_lineatus      | -----                                                        |
| Inocellia_crassicornis     | VTW-YPH-AMESPFFSG-STFTILTTL-LSSL-----NSCVNPWIFLLFNKDLFRLLKRL |
| Tenthredo_koehler          | VTW-DRN-ASASPFYSG-AAFTILTTL-LSSL-----NSCVNPWIYLTNLRDLRSLINR  |
| Corydalus_cornutus         | -----                                                        |
| Chrysopa_pallens           | ATW-DPY-AYKSPFWTG-ATFTILTTL-LSSL-----NSCVNPWIYLSFNKELRKLKHI  |
| Meloe_violaceus            | ATW-DPQ----NPFSEG-PVFVILAL-LYSL-----NSCVNPWIYLTFNRELPRLLVKH  |
| Aethina_tumida             | ATW-DPT----NPFQFG-PIFTILTTL-LYSL-----NSCVNPWIYLAFNRELPKYLLRH |
| Gyrinus_marinus            | -----                                                        |
| Tribolium_castaneum        | ATW-DPQ----SPFIDG-PVFVILTL-LYSL-----NSCVNPWIYLAFNRELPRLLLRH  |
| Nicrophorus_vespilloides   | ATW-DPE-AVNSPFLNG-PVFTIVSL-LYSL-----NSCFNPWIYLAFNRELPRLLLRH  |
| Aleochara_curtula          | -----                                                        |
| Pogonus_chalceus           | ATW-DPE-ANESAFFNG-AAFTILTTL-LSSL-----NSCVNPWIYLAFNRELPRLLLRH |
| Sipyloidea_sipylus         | ATW-DPH-ASDSPFFTG-AAFTILTTL-LSSL-----NSCVNPWIYLAFNTELVQLLAR  |
| Extatosoma_tiaratum        | ATW-DPH-ATESPFFTG-AAFTILAL-LSSL-----NSCVNPWIYLAFNTELVHLLATC  |
| Aretaon_asperrimus         | ATW-DPH-AAQSAFFTG-AAFTILAL-LSSL-----NSCVNPWIYLAFNTELVHLLTNR  |
| Medauroidea_extradentata   | ATW-DPH-ASESAFLTG-AAFTILAL-LSSL-----NSCVNPWIYLAFNTELVRLLLKK  |
| Ramulus_artemis            | ATW-DPH-ASESAFFTG-AAFTILAL-LSSL-----NSCVNPWIYLAFNTELVRLLVKR  |
| Galloisiana_yuasai         | -----                                                        |
| Athalia_rosae              | VTW-DPG-AVNSPFFEG-AAFAILTL-MSSL-----NSCVNPWIYLTNRELPRTLFAR   |

|                               |                           |     |
|-------------------------------|---------------------------|-----|
| Varroa_destructor1            | 661                       | 720 |
| Metaseiulus_occidentalis1     | LSFFGF-----CEHLS-----     |     |
| Metaseiulus_occidentalis2     | CSLIHL-----RGNRY-----     |     |
| Tigriopus_californicus        | -SLRTL-----KPEVH-----     |     |
| Anurida_maritima              | VGMRST-----IGGPD-----     |     |
| Meinertellus_cundinamarcensis | LGIGLR-----RGSSE-----     |     |
| Pogonognathellus_sp           | LGLGIG-----RAQGD-----     |     |
| Triops_cancriformis           | -----                     |     |
| Strigamia_maritima2           | LGLGLT-----RPKDIA-----    |     |
| Catajapyx_aquilonaris         | -----                     |     |
| Daphnia_pulex                 | SILLLR-----STHLF-----     |     |
| Daphnia_magna3                | LGLRWL-----RGQDK-----     |     |
| Daphnia_magna2                | LGLRWL-----RGQDK-----     |     |
| Daphnia_magna1                | LGLRWL-----RGQDK-----     |     |
| Daphnia_magna4                | LGLRWL-----RGQDK-----     |     |
| Arachnocampa_luminosa         | KTKV-----                 |     |
| Calanus_finmarchicus          | NENTTA-LQLSQMNEVFSPS----- |     |
| Epiophlebia_superstes         | LSARVR----YLLRPSFRPD----- |     |
| Ladona_fulva                  | LPGRVR----DAVRSLFRFN----- |     |
| Cordulegaster_boltonii        | LPGRVR----DLLRPIFHPD----- |     |
| Diaphorina_citri              | CSNLR-----SD-----         |     |
| Pachypsylla_venusta           | CFNINV-----KE-----        |     |
| Acanthocasuarina_muelleriana  | CVNLVL-----SE-----        |     |
| Glomeris_pustulata            | ICCRK-----RN-----         |     |
| Frankliniella_cephalica       | V----S-----CQ-----        |     |
| Machilis_hrabei               | LKKLM-----CG-----         |     |
| Carabus_granulatus            | Y--AA-----TS-----         |     |
| Dendroctonus_frontalis        | F--LA-----SN-----         |     |
| Lepeophtheirus_salmonis       | -----                     |     |
| Caligus_rogercresseyi         | -----                     |     |
| Parhyale_hawaiiensis          | -----                     |     |
| Hyaella_azteca                | -----                     |     |
| Strigamia_maritima1           | LCCSKE----NEMKSHRTL-----  |     |
| Conwentzia_psociformis        | -----                     |     |
| Liposcelis_bostrychophila     | -----                     |     |
| Tetranychus_urticae           | FCYCST----NTNINAGN-----   |     |
| Osmylus_fulvicephalus         | -----                     |     |
| Ornithodoros_turicata         | CCLAKV----SGRGCSYLA-----  |     |
| Acerentomon_sp                | -----                     |     |
| Ixodes_ricinus                | NCSIML----R-----          |     |
| Folsomia_candida              | -----                     |     |
| Limulus_polyphemus1           | CCHERS----QGYSQVPV-----   |     |
| Limulus_polyphemus3           | CCRSVL----QDYMAQSTE-----  |     |
| Platynothis_peltifer5         | -----                     |     |
| Platynothis_peltifer1         | -----                     |     |
| Platynothis_peltifer3         | -----                     |     |

|                            |                                                            |
|----------------------------|------------------------------------------------------------|
| Achipteria_coleoptrata2    | -----                                                      |
| Platynothrus_peltifer2     | -----                                                      |
| Platynothrus_peltifer4     | -----                                                      |
| Ixodes_scapularis2         | ICRCPDAKNVSSGIAGTGSCPSAVI-----                             |
| Ixodes_scapularis1         | -----                                                      |
| Ixodes_scapularis3         | -----                                                      |
| Cotesia_vestalis           | -----                                                      |
| Microplitis_demolitor      | LKLLLC-KQNVINYDI-----                                      |
| Zorotypus_caudelli         | -----                                                      |
| Nasonia_giraulti           | LRSLIK-RDRTSRFGK-----                                      |
| Nasonia_vitripennis        | LRSLIK-RDRTSRFER-----                                      |
| Varroa_destructor2         | -----                                                      |
| Leuctra_sp                 | -----                                                      |
| Tricholepidion_gertschi    | L-----                                                     |
| Perla_marginata            | -----                                                      |
| Crioscolia_alcione         | FFTSNDEYSLTYD-----                                         |
| Mischocyttarus_flavitaris  | FYNRNDEYSQTYYGQR-----                                      |
| Polistes_metricus          | FCNHNE-HSQKYYGQR-----                                      |
| Polistes_canadensis        | FCNRNE-HSQKYYGQR-----                                      |
| Chrysis_viridula           | LCCRSYD-YSTTYD-----                                        |
| Argochrysis_armilla        | LWCRNN-YSPTYD-----                                         |
| Chyphotes_mellipes         | LCRRQD-YSLTYG-----                                         |
| Brachycistis_timberlakei   | FFRED-YSLAYD-----                                          |
| Sphaerophthalma_orestes    | FCNSHD-YLPTYD-----                                         |
| Homalodisca_vitripennis    | SICTGS-PRHRNLRGS-----                                      |
| Cercopis_vulnerata         | -----                                                      |
| Nilaparvata_lugens         | LGCKYA-LS-SDYRGN-----                                      |
| Achipteria_coleoptrata1    | -----                                                      |
| Ephemera_danica            | GRV-----                                                   |
| Leptopilina_clavipes       | -----                                                      |
| Ganaspis_sp                | LRKITR-HKYSPPAS-----                                       |
| Leptopilina_boulardi       | LRKITR-HKYSPTS-----                                        |
| Mantis_religiosa           | -----                                                      |
| Blattella_germanica        | -----                                                      |
| Zootermopsis_nevadensis    | -----                                                      |
| Stigmatomma_oregonense     | FYNKRD-YSLTHGNC-----                                       |
| Dinoponera_quadriceps      | FFKRKD-YSPAY-----                                          |
| Harpegnathos_saltator      | FCKRKD-YSLAY-----                                          |
| Cerapachys_biroi           | FCKRKD-YSLTY-----                                          |
| Monomorium_pharaonis       | LCGKKD-YSLTYGNHNVSL-----                                   |
| Tetramorium_bicaratum      | FCKRKD-YSLTY-----                                          |
| Solenopsis_invicta         | FYRKKD-YSLTY-----                                          |
| Atta_cephalotes            | FYRKKD-YSLTY-----                                          |
| Acromyrmex_echinator       | FCKRKD-YSLTYGNHNLSTLSTLSTLYIYIYISSSHVCICLIPSNIWITRINIVIFIC |
| Pogonomyrmex_barbatus      | FCKRKD-YSLTY-----                                          |
| Wasmannia_auropunctata     | FCKRKD-YSLTY-----                                          |
| Vollenhovia_emeryi         | FCSKKD-YSLTY-----                                          |
| Orussus_abietinus          | LQAPTR-SK---QEADRKP-----                                   |
| Blaberus_atropos           | LFCRTQ-----                                                |
| Limulus_polyphemus2        | CCQTSS-KSFSSQVPE-----                                      |
| Isonychia_bicolor          | -----                                                      |
| Occasjapyx_japonicus       | -----                                                      |
| Baetis_sp                  | -----                                                      |
| Panonychus_ulmi            | -----                                                      |
| Frankliniella_occidentalis | -----                                                      |
| Eurylophella_sp            | -----                                                      |
| Telenomus_podisi           | FGRLFY-YNAYSIDR-----                                       |
| Aposthonia_japonica        | GASDLH-----YRGS-----                                       |
| Haploembia_palau           | -----                                                      |
| Halyomorpha_halys          | IICRKN-KDRPENVG---SG-----                                  |
| Stenobothrus_lineatus      | -----                                                      |
| Inocellia_crassicornis     | FVNNLD-SSKT-KYTR--GG-----                                  |
| Tenthredo_koehler          | LYPTRG-SSIKSQEN---P-----RQSI-----                          |
| Corydalus_cornutus         | -----                                                      |
| Chrysopa_pallens           | ICSKTY-KNKNYSTA-----I-----                                 |
| Meloe_violaceus            | CT---A-SSKNYKSA-----N-----                                 |
| Aethina_tumida             | YT---A-TNKKLKSS-----SM-----                                |
| Gyrinus_marinus            | -----                                                      |
| Tribolium_castaneum        | YT---A-SSKNYRSA-----T-----                                 |
| Nicrophorus_vespilloides   | YT---S-N-RNYREA-----                                       |
| Aleochara_curtula          | -----                                                      |
| Pogonus_chalceus           | YAATS----KNYRSA--GTGN-----                                 |
| Sipyloidea_sipylus         | -----                                                      |
| Extatosoma_tiaratum        | GNPRA----NADLIG-----                                       |
| Aretaon_asperimus          | ASAGA----HADLVS-----                                       |
| Medauroidea_extradentata   | GDPRT----NADLFG-----                                       |
| Ramulus_artemis            | GDPRT----NADLFG-----                                       |

Galloisiana\_yuasai  
Athalia\_rosae

-----  
IYSSG---RSASYARTREGR-----RRCV-----  
-----

Varroa\_destructor1  
Metaseiulus\_occidentalis1  
Metaseiulus\_occidentalis2  
Tigriopus\_californicus  
Anurida\_maritima  
Meinertellus\_cundinamarcensis  
Pogonognathellus\_sp  
Triops\_cancriformis  
Strigamia\_maritima2  
Catajapyx\_aquilonaris  
Daphnia\_pulex  
Daphnia\_magna3  
Daphnia\_magna2  
Daphnia\_magna1  
Daphnia\_magna4  
Arachnocampa\_luminosa  
Calanus\_finmarchicus  
Epiophlebia\_superstes  
Ladona\_fulva  
Cordulegaster\_boltonii  
Diaphorina\_citri  
Pachypsylla\_venusta  
Acanthocasuarina\_muellerianae  
Glomeris\_pustulata  
Frankliniella\_cephalica  
Machilis\_hrabei  
Carabus\_granulatus  
Dendroctonus\_frontalis  
Lepeophtheirus\_salmonis  
Caligus\_rogercresseyi  
Parhyale\_hawaiensis  
Hyalella\_azteca  
Strigamia\_maritima1  
Conwentzia\_psociformis  
Liposcelis\_bostrychophila  
Tetranychus\_urticae  
Osmylus\_fulvicephalus  
Ornithodoros\_turicata  
Acerentomon\_sp  
Ixodes\_ricinus  
Folsomia\_candida  
Limulus\_polyphemus1  
Limulus\_polyphemus3  
Platynothrus\_peltifer5  
Platynothrus\_peltifer1  
Platynothrus\_peltifer3  
Achipteria\_coleoptrata2  
Platynothrus\_peltifer2  
Platynothrus\_peltifer4  
Ixodes\_scapularis2  
Ixodes\_scapularis1  
Ixodes\_scapularis3  
Cotesia\_vestalis  
Microplitis\_demolitor  
Zorotypus\_caudelli  
Nasonia\_giraulti  
Nasonia\_vitripennis  
Varroa\_destructor2  
Leuctra\_sp  
Tricholepidion\_gertschi  
Perla\_marginata  
Crioscolia\_alcione  
Mischocyttarus\_flavitaris  
Polistes\_metricus  
Polistes\_canadensis  
Chrysis\_viridula  
Argochrysis\_armilla  
Chyphotes\_mellipes  
Brachycistis\_timberlakei  
Sphaerophthalma\_orestes  
Homalodisca\_vitripennis  
Cercopis\_vulnerata

721

780

-----VYRSKNA-ITIS-----  
-----GEESRKPCTRAN-----  
-----LI-----TV-----  
-----LG-----GADADRPEPQT-----HHRTKR  
-----SI-----GAEQDIILRTKKFKTPRPDTRPHQDK  
-----SI-----GDEPEG-KTPPP-----IQKQTNQDG  
-----  
-----SI-----GDEEPQPQQQP-----TNKLPSTKS  
-----  
-----I-----EQ-----L  
-----SI-----GEDDRRGAAGP-----AGGQPADTN  
-----SI-----GEDDRRGAAGP-----AGGQPADTN  
-----SI-----GEDDRRGAAGP-----AGGQPADTN  
-----SI-----GEDDRRGAAGP-----AGGQPADTN  
-----  
-----SPTPTR-----LRR---NLSKNSVLRES-----SFIEVV-----  
-----TTKRVRHQEASMSAS---SSSRG-----SSQPKIRANSEEGRN-----G  
-----TSKRLRHNDAITYAS---SSSRTR---SS---RESPQMEIKTLNSPVKDDPPS-----  
-----TNKRARHHDATASAS---LSSRTR---SS---RESPQPEVKATAESSKDEER---DG  
-----DTELT-MDTASAS---G--S-----KECGRRTESDLTF-  
-----ENRTV--DTASGN---SSSA-----RECCRRTDSNVTMG  
-----EAKVA-MDTASGM---SSS-----RERRNESEMTLG  
-----SSATNEHGAPIVG---VFSRSSL-----SDTNQRSTHVHTLAHQGG-----  
-----TGHPSGS---VLSA-----HSGGSGSSQSNTTQHRTCFTD-----  
-----GDYLNHNSGIPSGG---GFDRGTLFRSSSTSDSKAPSANQNKIAVTRTSVSSQSG  
-----KNYR---SAGTGN---SASN-----SSGGV-----ESTS-----  
-----KSYR---GAPDQG---TLSN-----SSGEQ-----VTSCLKLTRAS-----  
-----  
-----ATTYSRT---SFSE-----S-----VGPRVALQSLPPSSN-----  
-----  
-----RSKT---LDDS-----S-----VNI-----  
-----RDTTDGT---NDSN-----A-----HSV-----  
-----  
-----ENI-NNT---TSRS-----S-----QTD-----  
-----ATSNNNN---ANRS-----Y-----PTE-----  
-----  
-----LADLTT-QGT-EAQSVL---SYKSSPTDTSARLATAV-----VGKR-----  
-----  
-----D---TSYVNSNGS---STKSSIIVTMF-RFAGSMYH-----R-QT-YQERS---  
-----  
-----Y---QFYFLCQY-----  
-----A---SSNANSNETRSSKRSSFISRMS-RYTSFIIY-----G-PMRTIEIV-----  
-----  
-----QSMRRSDSFETSTR-----STLFSRIS-RLTGSA-----MFR-----  
-----GMMRRSDSNDTSTR-----ASLMSRIS-RYASSI-----IPR-----  
-----MMRRSDSNDTSTR-----TSLMSRIS-RYTSSI-----IPR-----  
-----MMRRSDSNDTSTR-----ISLMSRIS-RYTSSI-----IRR-----  
-----QELHPANSTETSTR-----SSFISRIF-WYAGSM-----IFR-----  
-----QELHPANSNETSTR-----SSLISRIS-RYAGSM-----IFR-----  
-----RNTHRSNSHENSTR-----SSLISRIS-RYAGTA-----IFR-----  
-----RDMQRSWNEASTR-----SSLISRIS-RYANSV-----ISH-----  
-----RDVRRGNSDETSTR-----SSLISRIS-RYAGSV-----IFR-----  
-----A-----SSCR-----  
-----

Nilaparvata\_lugens -----NSAAESGSSGCGAGSCSKRSEVTNTTSL-----LPRK-PLVAEQ-----  
 Achipteria\_coleoptratal -----  
 Ephemera\_danica -----  
 Leptopilina\_clavipes -----  
 Ganaspis\_sp -----DEASKNDHSNEPSTTS-----SLISKVSV-Y--PN-V--R-----PNYSEA-----  
 Leptopilina\_boulardi -----DDNSKIGHSNEPSTTS-----SLISKVST-C--PTTV--K-----PIYTEV-----  
 Mantis religiosa -----  
 Blattella\_germanica -----  
 Zootermopsis\_nevadensis -----  
 Stigmatomma\_oregonense -----  
 Dinoponera\_quadriceps -----DAVAQONASDAASTT-----SSFISRIS-RL-----  
 Harpegnathos\_saltator -----DVIARQNTSDAPSIT-----SSFISRIS-RL-----  
 Cerapachys\_biroi -----DIDAHQNASDVPSTT-----SSFISRIS-RL-----  
 Monomorium\_pharaonis -----  
 Tetramorium\_bicarinatum -----DIDARQNASDVPSTT-----SSFISRIS-RL-----  
 Solenopsis\_invicta -----DIDARQNASDVPSTT-----SSFISRIS-RL-----  
 Atta\_cephalotes -----DIDARQNASDVPSTT-----SSFISRIS-RL-----  
 Acromyrmex\_echinatior HFLSDIDARQNTSDVPSTT-----SSFISRIS-RL-----  
 Pogonomyrmex\_barbatus -----DIDARQNALDVPSTT-----SPFISRIS-RL-----  
 Wasmannia\_auropunctata -----DIDVRQNASDVPSTT-----SSFISRIS-RL-----  
 Vollenhovia\_emoryi -----DIDVRQNASDVPSTT-----SSFISRIS-RL-----  
 Orussus\_abietinus -----  
 Blaberus\_atropos -----  
 Limulus\_polyphemus2 -----NTDNNTFSRSERCSSYPLSVRTGSRHKFPDGTTRTRK-RLCRELGSK--  
 Isonychia\_bicolor -----  
 Occasjapyx\_japonicus -----  
 Baetis\_sp -----  
 Panonychus\_ulmi -----  
 Frankliniella\_occidentalis -----  
 Eurylophella\_sp -----  
 Telenomus\_podisi -----STRSGSSNENSTR-----SSFISRIS-RYAS-----F-VMHGPA-----  
 Aposthonia\_japonica -----SSSKERSRLSKLVSWRST-----  
 Haploembia\_palau -----  
 Halyomorpha\_halys -----GSSGRPHQS---CTLAGQHTH-----  
 Stenobothrus\_lineatus -----  
 Inocellia\_crassicornis -----MSKASNSSTVETAVGRLSWLSKSFSS-KASF-----  
 Tenthredo\_koehler -----EI-IRWGSSASSSGT---SIRSYASRMS-RYAN-----S-VLRRSSDSS--  
 Corydalus\_cornutus -----  
 Chrysopa\_pallens -----TNSGGSNSQGVST---TVRVPL---RISF-----YTRNDGG--  
 Meloe\_violaceus -----AGNSGNSSSGEPQST---SLRPFS---KWSF-----CNSPKSN--  
 Aethina\_tumida -----GNSGNSSSGEIQST---SLRTLS---RLSR-----NNSGRL--  
 Gyrinus\_marinus -----  
 Tribolium\_castaneum -----GGNSASNSGDAQST---SLRPFS---RWSL-----CNSARS--  
 Nicrophorus\_vespilloides -----AGNSTSNSSGGVEST---SLRPFT---RWSF-----CNGNRA--  
 Aleochara\_curtula -----  
 Pogonus\_chalceus -----SASNSSSGGVEST---SLRPFS---KWSL-----CASAKSS--  
 Sipyloidea\_sipylus -----  
 Extatosoma\_tiaratum -----GSGS-STT---SWRNSK---VYRL-----V-----  
 Aretaon\_asperimus -----GSGS-SST---SWRNSR---TYRL-----V-----  
 Medauroidea\_extradentata -----GSGS-STT---SWRNSK---VYRL-----V-----  
 Ramulus\_artemis -----GSGS-STT---SWRNSK---VYRL-----V-----  
 Galloisiana\_yuasai -----  
 Athalia\_rosae -----STETPCNSSGS-STG---TSVESY-----

781

840

Varroa\_destructor1 ILQYRPPNRSKRQPRAYRGA-----  
 Metaseiulus\_occidentalis1 AIVCE---KPARQLRGYRIS-----  
 Metaseiulus\_occidentalis2 -----  
 Tigrionus\_californicus ILFTRKAEPLKGNPLGARPHPLFALQDQE-IVRA---GIRSEPMLS-SHHR---PNV--K  
 Anurida\_maritima SR-----TMKQVS-TLDA---IENQGAFLQLETK---SEV--L  
 Meinertellus\_cundinamarcensis G---GGGGTK---SDL---V-----  
 Pogonognathellus\_sp -----  
 Triops\_cancriformis -----  
 Strigamia\_maritima2 EMV-----  
 Catajapyx\_aquilonaris -----  
 Daphnia\_pulex LFFIRVSRK---SRN-----I-----  
 Daphnia\_magna3 HRFGRGPRR---AQT---RDQHRQVMAEQQ-LLPA---GEQHPAMLATKCTR---ADI--V  
 Daphnia\_magna2 HRFGRGPRR---AQT---RDQHRQVMAEQQ-LLPA---GEQHPAMLATKCTR---ADI--V  
 Daphnia\_magna1 HRFGRGPRR---AQT---RDQHRQVMAEQQ-LLPA---GEQHPAMLATKCTR---ADI--V  
 Daphnia\_magna4 HRFGRGPRR---AQT---RDQHRQVMAEQQ-LLPA---GEQHPAMLATKCTR---ADI--V  
 Arachnocampa\_luminosa -----  
 Calanus\_finmarchicus ---GL-----QE-----  
 Epiophlebia\_superstes GR-----  
 Ladona\_fulva VKKNGVVAEPKTEK-----  
 Cordulegaster\_boltonii CRMIGLADRTKEEK-----AVKESAVLLSN-----A-----  
 Diaphorina\_citri ---LNRRTYSNPDEN-----GALIPLIILTF-----AYTCIC---RAI--I

|                               |                                                |
|-------------------------------|------------------------------------------------|
| Pachyphylla_venusta           | TYLNRQSCNDD--T-----YVSEDNLI-----               |
| Acanthocasuarina_muellerianae | TFLNRHEDT-----GM-SDDSL-----                    |
| Glomeris_pustulata            | -----                                          |
| Frankliniella_cephalica       | -----                                          |
| Machilis_hrabei               | VLLKRRRTLNGDKQP-----T-----                     |
| Carabus_granulatus            | -----                                          |
| Dendroctonus_frontalis        | -----PGRDR-----H-----                          |
| Lepeophtheirus_salmonis       | -----                                          |
| Caligus_rogercresseyi         | -----                                          |
| Parhyale_hawaiensis           | -----                                          |
| Hyalessa_azteca               | -----                                          |
| Strigamia_maritima1           | N-FLRVNDNK--L-----NVRVAAVSDSA-----LYSCEK-----R |
| Conwentzia_psociformis        | -----                                          |
| Liposcelis_bostrychophila     | -----                                          |
| Tetranychus_urticae           | -----EPHCSS-----IN--R                          |
| Osmylus_fulvicephalus         | -----                                          |
| Ornithodoros_turicata         | -----VSHCEGDHA-----RIKCSP--SKR--R              |
| Acerentomon_sp                | -----                                          |
| Ixodes_ricinus                | -----                                          |
| Folsomia_candida              | -----                                          |
| Limulus_polyphemus1           | -----NEICTSYPL-----SLRCGV--HY----              |
| Limulus_polyphemus3           | -----NEVNSSYPL-----SFFIAQ--EE----              |
| Platynothrus_peltifer5        | -----                                          |
| Platynothrus_peltifer1        | -----                                          |
| Platynothrus_peltifer3        | -----                                          |
| Achipteria_coleoptrata2       | -----                                          |
| Platynothrus_peltifer2        | -----                                          |
| Platynothrus_peltifer4        | -----                                          |
| Ixodes_scapularis2            | ---GATDVEEDL-----QC                            |
| Ixodes_scapularis1            | -----                                          |
| Ixodes_scapularis3            | -----                                          |
| Cotesia_vestalis              | -----                                          |
| Microplitis_demolitor         | ---TDFILT-----R                                |
| Zorotypus_caudelli            | -----                                          |
| Nasonia_giraulti              | -----                                          |
| Nasonia_vitripennis           | -----NKLYI-----                                |
| Varroa_destructor2            | -----                                          |
| Leuctra_sp                    | -----                                          |
| Tricholepidion_gertschi       | -----                                          |
| Perla_marginata               | -----                                          |
| Crioscolia_alcione            | -----                                          |
| Mischocyttarus_flavitaris     | -----                                          |
| Polistes_metricus             | -----                                          |
| Polistes_canadensis           | -----                                          |
| Chrysis_viridula              | -----                                          |
| Argochrysis_armilla           | -----                                          |
| Chyphotes_mellipes            | -----                                          |
| Brachycistis_timberlakei      | -----                                          |
| Sphaerophthalma_orestes       | -----                                          |
| Homalodisca_vitripennis       | -----                                          |
| Cercopis_vulnerata            | -----                                          |
| Nilaparvata_lugens            | -----PLPEVTPIRRWVVTIPPVNSREERECLQLFSGLNNERILPR |
| Achipteria_coleoptrata1       | -----                                          |
| Ephemera_danica               | -----                                          |
| Leptopilina_clavipes          | -----                                          |
| Ganaspis_sp                   | -----RERNIS-----                               |
| Leptopilina_boulardi          | -----RERNIS-----                               |
| Mantis religiosa              | -----                                          |
| Blattella_germanica           | -----                                          |
| Zootermopsis_nevadensis       | -----                                          |
| Stigmatomma_oregonense        | -----                                          |
| Dinoponera_quadriceps         | -----                                          |
| Harpegnathos_saltator         | -----                                          |
| Cerapachys_biroi              | -----                                          |
| Monomorium_pharaonis          | -----                                          |
| Tetramorium_bicaratum         | -----                                          |
| Solenopsis_invicta            | -----                                          |
| Atta_cephalotes               | -----                                          |
| Acromyrmex_echinatior         | -----                                          |
| Pogonomyrmex_barbatus         | -----                                          |
| Wasmannia_auropunctata        | -----                                          |
| Vollenhovia_emoryi            | -----                                          |
| Orussus_abietinus             | -----                                          |
| Blaberus_atropos              | -----                                          |
| Limulus_polyphemus2           | ---NESTDVGE--NRGSVTQTETT-----S-----            |
| Isonychia_bicolor             | -----                                          |
| Occasjapyx_japonicus          | -----                                          |



Baetis\_sp -----  
 Panonychus\_ulmi -----  
 Frankliniella\_occidentalis -----  
 Eurylophella\_sp -----  
 Telenomus\_podisi -----TK-----ERISR-----  
 Aposthonia\_japonica -----  
 Haploembia\_palaui -----YAKWVVALPPNLSSEDKTMLRL-----FR  
 Halyomorpha\_halys -----  
 Stenobothrus\_lineatus -----  
 Inocellia\_crassicornis ---QVHVN---NI---IQS-----  
 Tenthredo\_koehlerii ---SNKE-----LQPSNRIR-----  
 Corydalus\_cornutus -----  
 Chrysopa\_pallens ---ANG-----KQ-----TY  
 Meloe\_violaceus ---GNK-----YT-----SR  
 Aethina\_tumida ---NR-----CS-----VR  
 Gyrinus\_marinus -----  
 Tribolium\_castaneum ---NK-----YP-----TR  
 Nicrophorus\_vespilloides ---AAK-----FN-----PR  
 Aleochara\_curtula -----  
 Pogonus\_chalceus ---SAINHNGNNTNGHAIGSGD---FRARYPAPPASSAASTLIRLPAPAHSPQQLM  
 Sipyloidea\_sipylus -----  
 Extatosoma\_tiaratum -----SGSVFKQRDAVRERRSAPLRTIYGSLDLELL-----  
 Aretaon\_asperirum -----SGSMFKSRDSVRERRWAMAMPTKIPIATALMAGRDLDPSTSEEV-AS  
 Medauroidea\_extradentata -----NGSAFKQRDAVRERRWAMAMPTKIPIATALMAGRDPSTSQDV-A-  
 Ramulus\_artemis -----SGSAFKQRDSVRERRWAMAMPTKIPIATALMVGRDIPSTSQDA-A-  
 Galloisiana\_yuasai -----  
 Athalia\_rosae -----ASRMSRYAYAI-----LGKSDTANSKEF-HC

841

885

Varroa\_destructor1 -----  
 Metaseiulus\_occidentalis1 -----  
 Metaseiulus\_occidentalis2 -----  
 Tigriopus\_californicus NPLPA-----S-----NQNK---SWT-KT---  
 Anurida\_maritima -----  
 Meinertellus\_cundinamarcensis -----  
 Pogonognathellus\_sp -----  
 Triops\_cancriformis -----  
 Strigamia\_maritima2 -----  
 Catajapyx\_aquilonaris -----  
 Daphnia\_pulex -----  
 Daphnia\_magna3 THLGN-----TKKLQFQQNH---QHVEKIG--  
 Daphnia\_magna2 THLGN-----TKKLQFQQNH---QHVEKIG--  
 Daphnia\_magna1 THLGN-----TKKLQFQQNH---QHVEKIG--  
 Daphnia\_magna4 THLGN-----TKKLQFQQNH---QHVEKIG--  
 Arachnocampa\_luminosa -----  
 Calanus\_finmarchicus -----  
 Epiophlebia\_superstes -----  
 Ladona\_fulva -----  
 Cordulegaster\_boltonii ---PV-----  
 Diaphorina\_citri N--FSMKNSIRRHQFSRSSRSTRDS---ETENELCHTIVDSG--  
 Pachypsylla\_venusta ---VSRPRQWVVSVPDG-----  
 Acanthocasuarina\_muellerianae ---TLRSRQWVTLPDANQT---R-----  
 Glomeris\_pustulata -----  
 Frankliniella\_cephalica -----  
 Machilis\_hrabei ---AVEMRNWKDETNRPLPLLAETSDFIQCAIGENE---  
 Carabus\_granulatus ---LRPFSKWSLCASTKSTPRY-----  
 Dendroctonus\_frontalis ---LTNGRQWMVTAT-----  
 Lepeophtheirus\_salmonis -----  
 Caligus\_rogercresseyi -----  
 Parhyale\_hawaiiensis -----  
 Hyalella\_azteca -----  
 Strigamia\_maritima1 HSSPNLNVKSAASTLVLCSQ---QHHHDTQNHKLDGVTMETQCA  
 Conwentzia\_psociformis -----  
 Liposcelis\_bostrychophila -----  
 Tetranychus\_urticae NGSRTIFVSQKMSKYSDDKPSVEAHG---  
 Osmylus\_fulvicephalus -----  
 Ornithodoros\_turicata NGFRS-STDVEMRTAQDCGADT-----  
 Acerentomon\_sp -----  
 Ixodes\_ricinus -----  
 Folsomia\_candida -----  
 Limulus\_polyphemus1 ---TS-SFRLKTKITGCRPCPNIQDLHDEAETFSA---  
 Limulus\_polyphemus3 ---PV-MLRNRLKKKQ-----  
 Platynothis\_peltifer5 -----  
 Platynothis\_peltifer1 -----  
 Platynothis\_peltifer3 -----  
 Achipteria\_coleoptrata2 -----  
 Platynothis\_peltifer2 -----

|                            |                                        |
|----------------------------|----------------------------------------|
| Platynothis_peltifer4      | -----                                  |
| Ixodes_scapularis2         | S-----LEKTS-----                       |
| Ixodes_scapularis1         | -----                                  |
| Ixodes_scapularis3         | -----                                  |
| Cotesia_vestalis           | -----                                  |
| Microplitis_demolitor      | RQS-----                               |
| Zorotypus_caudelli         | -----                                  |
| Nasonia_giraulti           | -----                                  |
| Nasonia_vitripennis        | -----                                  |
| Varroa_destructor2         | -----                                  |
| Leuctra_sp                 | -----                                  |
| Tricholepidion_gertschi    | -----                                  |
| Perla_marginata            | -----                                  |
| Crioscolia_alcione         | -----                                  |
| Mischocyttarus-_flavitaris | -----                                  |
| Polistes_metricus          | -----                                  |
| Polistes_canadensis        | -----                                  |
| Chrysis_viridula           | -----                                  |
| Argochrysis_armilla        | -----                                  |
| Chyphotes_mellipes         | -----                                  |
| Brachycistis_timberlakei   | -----                                  |
| Sphaerophthalma_orestes    | -----                                  |
| Homalodisca_vitripennis    | -----                                  |
| Cercopis_vulnerata         | -----                                  |
| Nilaparvata_lugens         | SQQQQ---HNQQRAIR-TSSSPCR-AARCRLDL----- |
| Achipteria_coleoptrata1    | -----                                  |
| Ephemera_danica            | -----                                  |
| Leptopilina_clavipes       | -----                                  |
| Ganaspis_sp                | -----                                  |
| Leptopilina_boulardi       | -----                                  |
| Mantis_religiosa           | -----                                  |
| Blattella_germanica        | -----                                  |
| Zootermopsis_nevadensis    | -----                                  |
| Stigmatomma_oregonense     | -----                                  |
| Dinoponera_quadriceps      | -ASSKIFG-----                          |
| Harpegnathos_saltator      | -ASSKIFG-----                          |
| Cerapachys_biroi           | -ASSKIFG-----                          |
| Monomorium_pharaonis       | -----                                  |
| Tetramorium_bicarinarum    | -ASSKIFG-----                          |
| Solenopsis_invicta         | -ASSKIFG-----                          |
| Atta_cephalotes            | -ASSKIFG-----                          |
| Acromyrmex_echinatior      | -ASSKIFG-----                          |
| Pogonomyrmex_barbatus      | -ISSKIFE-----                          |
| Wasmannia_auropunctata     | -ASSKIFG-----                          |
| Vollenhovia_emoryi         | -ASSKIFG-----                          |
| Orussus_abietinus          | -----                                  |
| Blaberus_atropos           | -----                                  |
| Limulus_polyphemus2        | -EPGKFVTRDKDKTLC-----                  |
| Isonychia_bicolor          | -----                                  |
| Occasjapyx_japonicus       | -----                                  |
| Baetis_sp                  | -----                                  |
| Panonychus_ulmi            | -----                                  |
| Frankliniella_occidentalis | -----                                  |
| Eurylophella_sp            | -----                                  |
| Telenomus_podisi           | -----                                  |
| Aposthonia_japonica        | -----                                  |
| Haploembia_palau           | -----                                  |
| Halyomorpha_halys          | TPNRNVWSS-LEAKYETTDSKLSPE-L-----       |
| Stenobothrus_lineatus      | -----                                  |
| Inocellia_crassicornis     | -----                                  |
| Tenthredo_koehleri         | -----                                  |
| Corydalus_cornutus         | -----                                  |
| Chrysopa_pallens           | TTNYHPSVRYTPKKWTVAIEELPP-----          |
| Meloe_violaceus            | LTQRPYDAQSNTRRWIVTTTT-----             |
| Aethina_tumida             | TANQNYITKYDAKDWIVATAT-----             |
| Gyrinus_marinus            | -----                                  |
| Tribolium_castaneum        | VPHRPYVAQYNARRWIVTTTT-----             |
| Nicrophorus_vespilloides   | QPQRQYVTQYNARRWIVTTTT-----             |
| Aleochara_curtula          | -----                                  |
| Pogonus_chalceus           | QQPSPFLGRYHARRWIVTTSA-----             |
| Sipyloidea_sipylus         | -----                                  |
| Extatosoma_tiaratum        | -----                                  |
| Aretaon_asperimus          | -----                                  |
| Medauroidea_extradentata   | -----                                  |
| Ramulus_artemis            | -----                                  |
| Galloisiana_yuasai         | -----                                  |
| Athalia_rosae              | LQSSSLRGIRNELE-----                    |

**Supplementary Figure S4. Discrimination between oxytocin/vasopressin-like and crustacean cardioactive peptide receptors.** Sequence logo frequency plots and alignments of sequence stretches used to distinguish oxytocin/vasopressin-like from closely related crustacean cardioactive peptide (CCAP) receptors. (A) Sequence logo of the end of transmembrane domain 2 and the beginning of extracellular loop 1 of 68 oxytocin/vasopressin-like receptors (upper panel) and 68 CCAP receptors (lower panel). (B) Sequence logo of transmembrane domain 7 of 68 oxytocin-like receptors (upper panel) and 68 CCAP receptors (lower panel). Individual sequences and of those conserved motifs are shown for oxytocin/vasopressin-like (C) and CCAP receptors (D). Conserved residues are highlighted in green. Major differences of oxytocin/vasopressin-like to CCAP receptor sequences are shown in red.

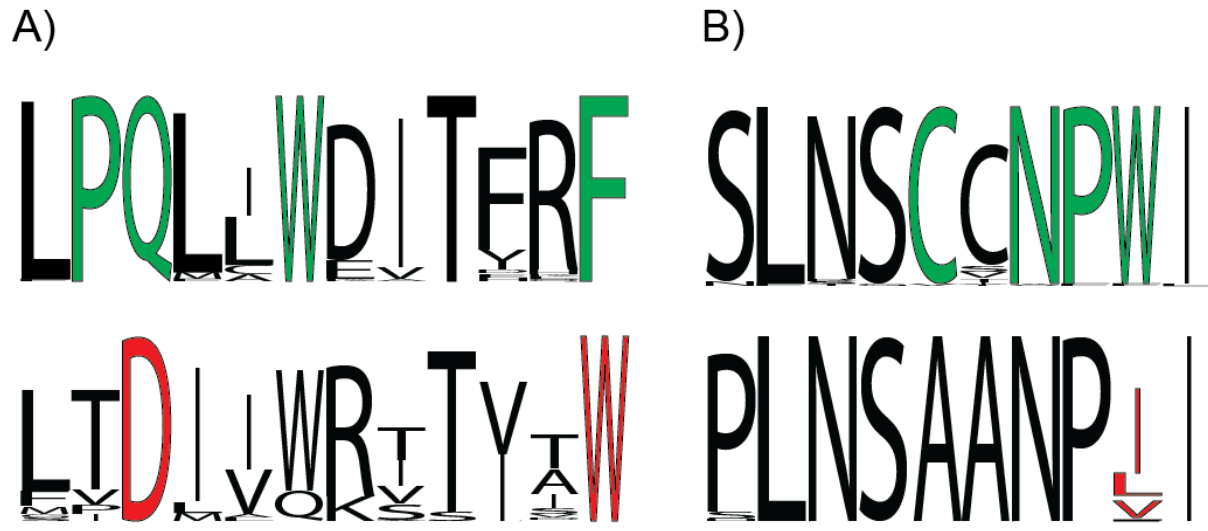

(C)

Transmembrane domain 2/extracellular loop 1 (XPQX<sub>2</sub>WX<sub>5,6</sub>F)

Transmembrane domain 7 (CXNPW)

|                            |             |                            |            |
|----------------------------|-------------|----------------------------|------------|
| tr Q6Q4A4 Q6Q4A4_THETS     | LPQLLDITEK  | tr Q6Q4A4 Q6Q4A4_THETS     | SLNSCVNPI  |
| tr B1NWW5 B1NWW5_TRICA     | LPQLADITFR  | tr B1NWW5 B1NWW5_TRICA     | SLNSCVNPWI |
| gi 332020179 gb EGI60623.1 | LPQLADITFR  | gi 332020179 gb EGI60623.1 | SLTSCVNPWI |
| sp Q75W84 ANR_EISFO        | LPQLLDVTHRF | sp Q75W84 ANR_EISFO        | SLNSCINPWI |
| sp Q7YW31 CTR1_OCTVU       | LPQLMDITFL  | sp Q7YW31 CTR1_OCTVU       | SLNSCTNPWI |
| tr K9JBV2 K9JBV2_DAPPU     | LPQLADITFR  | tr K9JBV2 K9JBV2_DAPPU     | SLNSCSNPWI |
| sp P30518 V2R_HUMAN        | LPQLAKATDRF | sp P30518 V2R_HUMAN        | SLNSCTNPWI |
| tr B3XZZ4 B3XZZ4_PROAN     | LPQLLDVTDQF | tr B3XZZ4 B3XZZ4_PROAN     | SLNSCSNPWI |
| tr Q25397 Q25397_LYMST     | LPQLWDITERF | tr Q25397 Q25397_LYMST     | SLNSCCNPWI |
| tr H7CEK0 H7CEK0_TRISC     | LPQLWEITFR  | tr H7CEK0 H7CEK0_TRISC     | SLNSCCNPWI |
| tr H3K0J0 H3K0J0_CALMI     | LPQLWEITFR  | tr H3K0J0 H3K0J0_CALMI     | SLNSCCNPWI |
| tr H2T2H1 H2T2H1_TAKRU     | FPQLWDITFR  | tr H2T2H1 H2T2H1_TAKRU     | SLNSCCNPWI |
| tr DOUYC9 DOUYC9_CYPNE     | LPQLWDITFR  | tr DOUYC9 DOUYC9_CYPNE     | SLNSCCNPWI |
| tr H1ADE8 H1ADE8_ORYLA     | LPQLWDITFR  | tr H1ADE8 H1ADE8_ORYLA     | SLNSCCNPWI |
| tr H2LDT4 H2LDT4_ORYLA     | LPQLWDITFR  | tr H2LDT4 H2LDT4_ORYLA     | SLNSCCNPWI |
| tr E4W698 E4W698_DANRE     | LPQLWDITFR  | tr E4W698 E4W698_DANRE     | SLNSCCNPWI |
| sp Q90334 ITR_CATCO        | LPQLWDITFR  | sp Q90334 ITR_CATCO        | SLNSCCNPWI |
| tr E4W699 E4W699_DANRE     | LPQLWDITFR  | tr E4W699 E4W699_DANRE     | SLNSCCNPWI |
| tr G3N7A8 G3N7A8_GASAC     | LPQLWDITFR  | tr G3N7A8 G3N7A8_GASAC     | SLNSCCNPWI |
| tr H7CEB8 H7CEB8_AMPOC     | LPQLWDITFR  | tr H7CEB8 H7CEB8_AMPOC     | SLNSCCNPWI |
| tr H1ADE9 H1ADE9_ORYLA     | LPQLWDITFR  | tr H1ADE9 H1ADE9_ORYLA     | SLNSCCNPWI |
| tr H3DAW1 H3DAW1_TETNG     | LPQLWDITFR  | tr H3DAW1 H3DAW1_TETNG     | SLNSCCNPWI |
| tr H2S576 H2S576_TAKRU     | LPQLWDITFR  | tr H2S576 H2S576_TAKRU     | SLNSCCNPWI |
| tr H2S575 H2S575_TAKRU     | LPQLWDITFR  | tr H2S575 H2S575_TAKRU     | SLNSCCNPWI |
| tr G3WCZ9 G3WCZ9_SARHA     | LPQLWDITFR  | tr G3WCZ9 G3WCZ9_SARHA     | SLNSCCNPWI |
| tr F6U716 F6U716_MONDO     | LPQLLDITFR  | tr F6U716 F6U716_MONDO     | SLNSCCNPWI |
| tr G5BX96 G5BX96_HETGA     | LPQLWDITFR  | tr G5BX96 G5BX96_HETGA     | SLNSCCNPWI |
| sp Q28756 OXYR_SHEEP       | LPQLWDITFR  | sp Q28756 OXYR_SHEEP       | SLNSCCNPWI |
| sp P56449 OXYR_BOVIN       | LPQLWDITFR  | sp P56449 OXYR_BOVIN       | SLNSCCNPWI |
| tr C4PD02 C4PD02_BUBBU     | LPQLWDITFR  | tr C4PD02 C4PD02_BUBBU     | SLNSCCNPWI |
| tr G1SQ05 G1SQ05_RABIT     | LPQLWDITFR  | tr G1SQ05 G1SQ05_RABIT     | SLNSCCNPWI |
| tr H0VZP0 H0VZP0_CAVPO     | LPQLWDITFR  | tr H0VZP0 H0VZP0_CAVPO     | SLNSCCNPWI |
| tr G1PUQ9 G1PUQ9_MYOLU     | LPQLWDITFR  | tr G1PUQ9 G1PUQ9_MYOLU     | SLNSCCNPWI |
| tr G3TTL6 G3TTL6_LOXAF     | LPQLWDITFR  | tr G3TTL6 G3TTL6_LOXAF     | SLNSCCNPWI |

|    |        |              |              |    |        |              |            |
|----|--------|--------------|--------------|----|--------|--------------|------------|
| tr | G3UGJ6 | G3UGJ6_LOXAF | LPOLLNDITFRF | tr | G3UGJ6 | G3UGJ6_LOXAF | SLNSCCNPWI |
| sp | P32306 | OXYR_PIG     | LPOLLNDITFRF | sp | P32306 | OXYR_PIG     | SLNSCCNPWI |
| tr | E3V2E5 | E3V2E5_CANFA | LPOLLNDITFRF | tr | E3V2E5 | E3V2E5_CANFA | SLNSCCNPWI |
| tr | G1M104 | G1M104_AILME | LPOLLNDITFRF | tr | G1M104 | G1M104_AILME | SLNSCCNPWI |
| tr | G3H112 | G3H112_CRIGR | LPOLLNDITFRF | tr | G3H112 | G3H112_CRIGR | SLNSCCNPWI |
| tr | E0V872 | E0V872_MICOH | LPOLLNDITFRF | tr | E0V872 | E0V872_MICOH | SLNSCCNPWI |
| sp | P97926 | OXYR_MOUSE   | LPOLLNDITFRF | sp | P97926 | OXYR_MOUSE   | SLNSCCNPWI |
| sp | P70536 | OXYR_RAT     | LPOLLNDITFRF | sp | P70536 | OXYR_RAT     | SLNSCCNPWI |
| tr | F2YMM4 | F2YMM4_SAISS | LPOLLNDITYRF | tr | F2YMM4 | F2YMM4_SAISS | SLNSCCNPWI |
| tr | F7ILY7 | F7ILY7_CALJA | LPOLLNDITFRF | tr | F7ILY7 | F7ILY7_CALJA | SLNSCCNPWI |
| tr | H0WII7 | H0WII7_OTOGA | LPOLLNDITFRF | tr | H0WII7 | H0WII7_OTOGA | SLNSCCNPWI |
| sp | P56494 | OXYR_MACMU   | LPOLLNDITFRF | sp | P56494 | OXYR_MACMU   | SLNSCCNPWI |
| tr | E3V2E7 | E3V2E7_MACFA | LPOLLNDITFRF | tr | E3V2E7 | E3V2E7_MACFA | SLNSCCNPWI |
| sp | P30559 | OXYR_HUMAN   | LPOLLNDITFRF | sp | P30559 | OXYR_HUMAN   | SLNSCCNPWI |
| tr | G1QUE2 | G1QUE2_NOMLE | LPOLLNDITFRF | tr | G1QUE2 | G1QUE2_NOMLE | SLNSCCNPWI |
| tr | G3R8I4 | G3R8I4_GORGO | LPOLLNDITFRF | tr | G3R8I4 | G3R8I4_GORGO | SLNSCCNPWI |
| tr | Q5D7U5 | Q5D7U5_CHICK | LPOLLNDITFRF | tr | Q5D7U5 | Q5D7U5_CHICK | SLNSCCNPWI |
| tr | G3USG7 | G3USG7_MELGA | LPOLLNDITFRF | tr | G3USG7 | G3USG7_MELGA | SFRGVSAPWL |
| tr | Q3LRX3 | Q3LRX3_TARGR | LPOLLNDITFRF | tr | Q3LRX3 | Q3LRX3_TARGR | SLNSCCNPWI |
| tr | F7C7K9 | F7C7K9_XENTR | LPOLLNDITFRF | tr | F7C7K9 | F7C7K9_XENTR | SLNSCCNPWI |
| tr | Q6WNV4 | Q6WNV4_LITCT | LPOLLNDITFRF | tr | Q6WNV4 | Q6WNV4_LITCT | SLNSCCNPWI |
| sp | Q90252 | MTR_BUFMA    | LPOLLNDITFRF | sp | Q90252 | MTR_BUFMA    | SLNSCCNPWI |
| tr | Q8AYS5 | Q8AYS5_HYLJA | LPOLLNDITFRF | tr | Q8AYS5 | Q8AYS5_HYLJA | SLNSCCNPWI |
| tr | H7CE74 | H7CE74_PROAN | LPOLLNDITFRF | tr | H7CE74 | H7CE74_PROAN | SLNSCCNPWI |
| tr | H3BG77 | H3BG77_LATCH | LPOLLNDITFRF | tr | H3BG77 | H3BG77_LATCH | SLNSCCNPWI |
| sp | P37288 | V1AR_HUMAN   | LPQMCNDITYRF | sp | P37288 | V1AR_HUMAN   | SLNSCCNPWI |
| tr | A8CWP8 | A8CWP8_CHICK | LPQLCNEVTHRF | tr | A8CWP8 | A8CWP8_CHICK | SLNSCCNPWI |
| tr | H3K0J2 | H3K0J2_CALMI | LPQFNDITYRF  | tr | H3K0J2 | H3K0J2_CALMI | SLNSCCNPWI |
| sp | Q90352 | AVT_CATCO    | LPQLCNEITFRF | sp | Q90352 | AVT_CATCO    | SLNSCCNPWI |
| tr | Q6WNV5 | Q6WNV5_LITCT | LPQLCNEITYRF | tr | Q6WNV5 | Q6WNV5_LITCT | SLNSCCNPWI |
| tr | B3XZZ3 | B3XZZ3_PROAN | LPQLCNEVTYRF | tr | B3XZZ3 | B3XZZ3_PROAN | SLNSCCNPWI |
| tr | H7CEB4 | H7CEB4_PROAN | LPQMIWEVTYRF | tr | H7CEB4 | H7CEB4_PROAN | SLNSCCNPWI |
| sp | P47901 | V1BR_HUMAN   | LPOLLNDITYRF | sp | P47901 | V1BR_HUMAN   | NLNSCCNPWI |
| tr | H3K0J1 | H3K0J1_CALMI | LPQLCNEITYRF | tr | H3K0J1 | H3K0J1_CALMI | NLNSCCNPWI |

(D)

**Transmembrane domain 2/extracellular loop1 (X<sub>2</sub>DX<sub>8</sub>W)**

**Transmembrane domain 7 (AXNPV/L/F)**

|    |           |     |                |               |    |           |     |                |            |
|----|-----------|-----|----------------|---------------|----|-----------|-----|----------------|------------|
| gi | 768420480 | ref | XP_011551009.1 | LPQLIQRTITISW | gi | 768420480 | ref | XP_011551009.1 | PLNSANPVI  |
| gi | 913307839 | ref | XP_013184425.1 | LPQLIQRTITITW | gi | 913307839 | ref | XP_013184425.1 | PLNSANPVI  |
| gi | 909558612 | ref | XP_013134323.1 | LPQLIQRTITISW | gi | 909558612 | ref | XP_013134323.1 | PLNSANPVI  |
| gi | 943960983 | ref | XP_014363004.1 | LPQLIQRTITISW | gi | 943960983 | ref | XP_014363004.1 | PLNSANPVI  |
| gi | 910347322 | ref | XP_013177593.1 | LPQLIQRTITISW | gi | 910347322 | ref | XP_013177593.1 | PLNSANPVI  |
| gi | 913307945 | ref | XP_013184483.1 | FVILQKITTIAN  | gi | 913307945 | ref | XP_013184483.1 | PLNSANPLII |
| gi | 913307943 | ref | XP_013184481.1 | FVILQKITTIAN  | gi | 913307943 | ref | XP_013184481.1 | PLNSANPLII |
| gi | 943960974 | ref | XP_014363000.1 | FVILQKITTITW  | gi | 943960974 | ref | XP_014363000.1 | PLNSANPLII |
| gi | 910348561 | ref | XP_013178264.1 | FVILQKITTITW  | gi | 910348561 | ref | XP_013178264.1 | PLNSANPLII |
| gi | 910348559 | ref | XP_013178263.1 | FVILQKITTITW  | gi | 910348559 | ref | XP_013178263.1 | PLNSANPLII |
| gi | 909558903 | ref | XP_013134477.1 | FVILQKITTIAN  | gi | 909558903 | ref | XP_013134477.1 | PLNSANPLII |
| gi | 909558901 | ref | XP_013134476.1 | FVILQKITTIAN  | gi | 909558901 | ref | XP_013134476.1 | PLNSANPLII |
| gi | 909558899 | ref | XP_013134475.1 | FVILQKITTIAN  | gi | 909558899 | ref | XP_013134475.1 | PLNSANPLII |
| gi | 817089496 | ref | XP_012267616.1 | GTIARSTVDW    | gi | 817089496 | ref | XP_012267616.1 | PLNSANPLII |
| gi | 817089494 | ref | XP_012267615.1 | GTIARSTVDW    | gi | 817089494 | ref | XP_012267615.1 | PLNSANPLII |
| gi | 936698029 | ref | XP_014226999.1 | LTIIVRSTVAN   | gi | 936698029 | ref | XP_014226999.1 | HLNSANPLII |
| gi | 939636316 | ref | XP_014294173.1 | LTIIVRVTIAN   | gi | 939636316 | ref | XP_014294173.1 | PLNSANPLII |
| gi | 939636313 | ref | XP_014294172.1 | LTIIVRVTIAN   | gi | 939636313 | ref | XP_014294172.1 | PLNSANPLII |
| gi | 939276044 | ref | XP_014258479.1 | STIIVRITITW   | gi | 939276044 | ref | XP_014258479.1 | PLNSANPLII |
| gi | 641666914 | ref | XP_008183896.1 | MIMMIWRITVAV  | gi | 641666914 | ref | XP_008183896.1 | PLNSANPLII |
| gi | 641666912 | ref | XP_008183895.1 | MIMMIWRITVAV  | gi | 641666912 | ref | XP_008183895.1 | PLNSANPLII |
| gi | 641666910 | ref | XP_008183894.1 | MIMMIWRITVAV  | gi | 641666910 | ref | XP_008183894.1 | PLNSANPLII |
| gi | 328713510 | ref | XP_003245097.1 | MIMMIWRITVAV  | gi | 328713510 | ref | XP_003245097.1 | PLNSANPLII |
| gi | 662202708 | ref | XP_008474661.1 | LTIIVWRSSVTW  | gi | 662202708 | ref | XP_008474661.1 | PLNSANPLII |
| gi | 939631611 | ref | XP_014282181.1 | STIIVRITVAN   | gi | 939631611 | ref | XP_014282181.1 | PLNSANPVI  |
| gi | 939258178 | ref | XP_014248905.1 | LTIIVRITVAN   | gi | 939258178 | ref | XP_014248905.1 | PLNSANPVI  |
| gi | 939258176 | ref | XP_014248904.1 | LTIIVRITVAN   | gi | 939258176 | ref | XP_014248904.1 | PLNSANPVI  |
| gi | 939258174 | ref | XP_014248903.1 | LTIIVRITVAN   | gi | 939258174 | ref | XP_014248903.1 | PLNSANPVI  |
| gi | 929381616 | ref | XP_014101257.1 | LTIIVRITVAN   | gi | 929381616 | ref | XP_014101257.1 | PLNSANPLII |
| gi | 939259418 | ref | XP_014249533.1 | LTIIVRSTVEW   | gi | 939259418 | ref | XP_014249533.1 | PLNSANPVI  |
| gi | 817085633 | ref | XP_012265516.1 | LTIIVWRSTITW  | gi | 817085633 | ref | XP_012265516.1 | PLNSANPLII |
| gi | 817085631 | ref | XP_012265515.1 | LTIIVWRSTITW  | gi | 817085631 | ref | XP_012265515.1 | PLNSANPLII |
| gi | 665804934 | ref | XP_008550635.1 | LTIIVRVTIIN   | gi | 665804934 | ref | XP_008550635.1 | PLNSANPLII |
| gi | 665804932 | ref | XP_008550634.1 | LTIIVRVTIIN   | gi | 665804932 | ref | XP_008550634.1 | PLNSANPLII |
| gi | 665804930 | ref | XP_008550633.1 | LTIIVRVTIIN   | gi | 665804930 | ref | XP_008550633.1 | PLNSANPLII |
| gi | 665804928 | ref | XP_008550632.1 | LTIIVRVTIIN   | gi | 665804928 | ref | XP_008550632.1 | PLNSANPLII |
| gi | 665804926 | ref | XP_008550631.1 | LTIIVRVTIIN   | gi | 665804926 | ref | XP_008550631.1 | PLNSANPLII |
| gi | 665804924 | ref | XP_008550630.1 | LTIIVRVTIIN   | gi | 665804924 | ref | XP_008550630.1 | PLNSANPLII |
| gi | 665804922 | ref | XP_008550629.1 | LTIIVRVTIIN   | gi | 665804922 | ref | XP_008550629.1 | PLNSANPLII |
| gi | 665804920 | ref | XP_008550628.1 | LTIIVRVTIIN   | gi | 665804920 | ref | XP_008550628.1 | PLNSANPLII |
| gi | 665804918 | ref | XP_008550627.1 | LTIIVRVTIIN   | gi | 665804918 | ref | XP_008550627.1 | PLNSANPLII |
| gi | 665804916 | ref | XP_008550626.1 | LTIIVRVTIIN   | gi | 665804916 | ref | XP_008550626.1 | PLNSANPLII |
| gi | 665804914 | ref | XP_008550625.1 | LTIIVRVTIIN   | gi | 665804914 | ref | XP_008550625.1 | PLNSANPLII |
| gi | 755928159 | ref | XP_011306641.1 | LTIIVRSTVTW   | gi | 755928159 | ref | XP_011306641.1 | PLNSANPLII |
| gi | 755928161 | ref | XP_011306649.1 | LTIIVRSTVTW   | gi | 755928161 | ref | XP_011306649.1 | PLNSANPLII |

|    |           |     |                |              |    |           |     |                |           |
|----|-----------|-----|----------------|--------------|----|-----------|-----|----------------|-----------|
| gi | 755928156 | ref | XP_011306628.1 | LTIIVWRSTVTM | gi | 755928156 | ref | XP_011306628.1 | PLNSANPTI |
| gi | 755928154 | ref | XP_011306619.1 | LTIIVWRSTVTM | gi | 755928154 | ref | XP_011306619.1 | PLNSANPTI |
| gi | 755928151 | ref | XP_011306611.1 | LTIIVWRSTVTM | gi | 755928151 | ref | XP_011306611.1 | PLNSANPTI |
| gi | 954560085 | ref | XP_014603803.1 | LTIIWRTTVM   | gi | 954560085 | ref | XP_014603803.1 | PLNSANPTI |
| gi | 954560083 | ref | XP_014603802.1 | LTIIWRTTVM   | gi | 954560083 | ref | XP_014603802.1 | PLNSANPTI |
| gi | 951561515 | ref | XP_014479680.1 | LTIIWRATVM   | gi | 951561515 | ref | XP_014479680.1 | PLNSANPTI |
| gi | 746852311 | ref | XP_011056707.1 | LTIIWRTTVM   | gi | 746852311 | ref | XP_011056707.1 | PLNSANPTI |
| gi | 746852309 | ref | XP_011056706.1 | LTIIWRTTVM   | gi | 746852309 | ref | XP_011056706.1 | PLNSANPTI |
| gi | 746852307 | ref | XP_011056705.1 | LTIIWRTTVM   | gi | 746852307 | ref | XP_011056705.1 | PLNSANPTI |
| gi | 746852305 | ref | XP_011056704.1 | LTIIWRTTVM   | gi | 746852305 | ref | XP_011056704.1 | PLNSANPTI |
| gi | 826496319 | ref | XP_012541117.1 | LTIIWRTTVM   | gi | 826496319 | ref | XP_012541117.1 | SLNSANPTI |
| gi | 826496313 | ref | XP_012541116.1 | LTIIWRTTVM   | gi | 826496313 | ref | XP_012541116.1 | SLNSANPTI |
| gi | 826496307 | ref | XP_012541114.1 | LTIIWRTTVM   | gi | 826496307 | ref | XP_012541114.1 | SLNSANPTI |
| gi | 759077735 | ref | XP_011348644.1 | LTIIWRTTVM   | gi | 759077735 | ref | XP_011348644.1 | PLNSANPTI |
| gi | 759077733 | ref | XP_011348643.1 | LTIIWRTTVM   | gi | 759077733 | ref | XP_011348643.1 | PLNSANPTI |
| gi | 759077731 | ref | XP_011348642.1 | LTIIWRTTVM   | gi | 759077731 | ref | XP_011348642.1 | PLNSANPTI |
| gi | 759077729 | ref | XP_011348641.1 | LTIIWRTTVM   | gi | 759077729 | ref | XP_011348641.1 | PLNSANPTI |
| gi | 759077727 | ref | XP_011348640.1 | LTIIWRTTVM   | gi | 759077727 | ref | XP_011348640.1 | PLNSANPTI |
| gi | 759077725 | ref | XP_011348639.1 | LTIIWRTTVM   | gi | 759077725 | ref | XP_011348639.1 | PLNSANPTI |
| gi | 752886184 | ref | XP_011260909.1 | LTIIWRTTVM   | gi | 752886184 | ref | XP_011260909.1 | PLNSANPTI |
| gi | 795082282 | ref | XP_011877638.1 | LTIIWRTTVM   | gi | 795082277 | ref | XP_011877637.1 | PLNSANPTI |
| gi | 795082287 | ref | XP_011877639.1 | LTIIWRTTVM   | gi | 795082272 | ref | XP_011877636.1 | PLNSANPTI |
| gi | 795082277 | ref | XP_011877637.1 | LTIIWRTTVM   | gi | 768420480 | ref | XP_011551009.1 | PLNSANPTI |

**Supplementary Figure S5. Phylogenetic tree of inotocin receptors.** (A) Enlarged view early-diverging lineages of Arthropoda (Chelicerata, Myriapoda and Crustaceans) (enlarged view of dashed rectangle in B). The same colour is used for one species. Full species name is shown only for genus, which represent more than one species (*Daphnia* and *Ixodes*). Receptor sequence numbers are the same as in Supplementary Data S2. (B) Entire phylogenetic tree of inotocin receptors. Partial sequences shorter than 200 residues were excluded, giving a total of 93 receptors that were selected for analyses. Vertebrate and invertebrate oxytocin/vasopressin-like receptors (OT/AVPR) as well as vertebrate neuropeptide S receptor (NPSR)/invertebrate crustacean cardioactive peptide receptor (CCAPR) and adipokinetic hormone receptor (AKHR) were also included in the analyses. According to the study of Pitti and Manoj<sup>1</sup> the mouse gonadotropin-releasing hormone receptor (GnRHR) was used as outgroup. In most of the cases sequences of species within the same insect order are clustering together with high confidence values, i.e. Collembola (99% confidence value), Odonata (100%), Ephemeroptera (78%), Hemiptera (55%), Hymenoptera (83%), Embioptera (100%), Phasmatodea (100%), and Coleoptera (94%). However, the tree topology is not well-resolved regarding early diverging lineages, namely the Chelicerata, Myriapoda and Crustacean receptor sequences. Phylogeny supports lineage-specific duplication of inotocin receptor for some of the species (e.g. *Limulus polyphemus*). Some of similar species could share the same WGD or large scale duplication event (*Platynothrus peltifer* and *Achipteria coleoptrata*; *Ixodes scapularis* and *Ixodes ricinus*; possibly *Metaseiulus occidentalis* and *Varroa destructor* - only one inotocin receptor of *V. destructor* was analysed; the second one is a very short partial sequence and was not included into analyses), but phylogeny does not support the duplication event at the base of Chelicerata. Two inotocin receptors of *Strigamia maritima* are very different from each other, but unfortunately it is the only species of Myriapoda in our list having two copies of receptors, hence it would be too far-fetched to draw any conclusions based on this result.

(A)

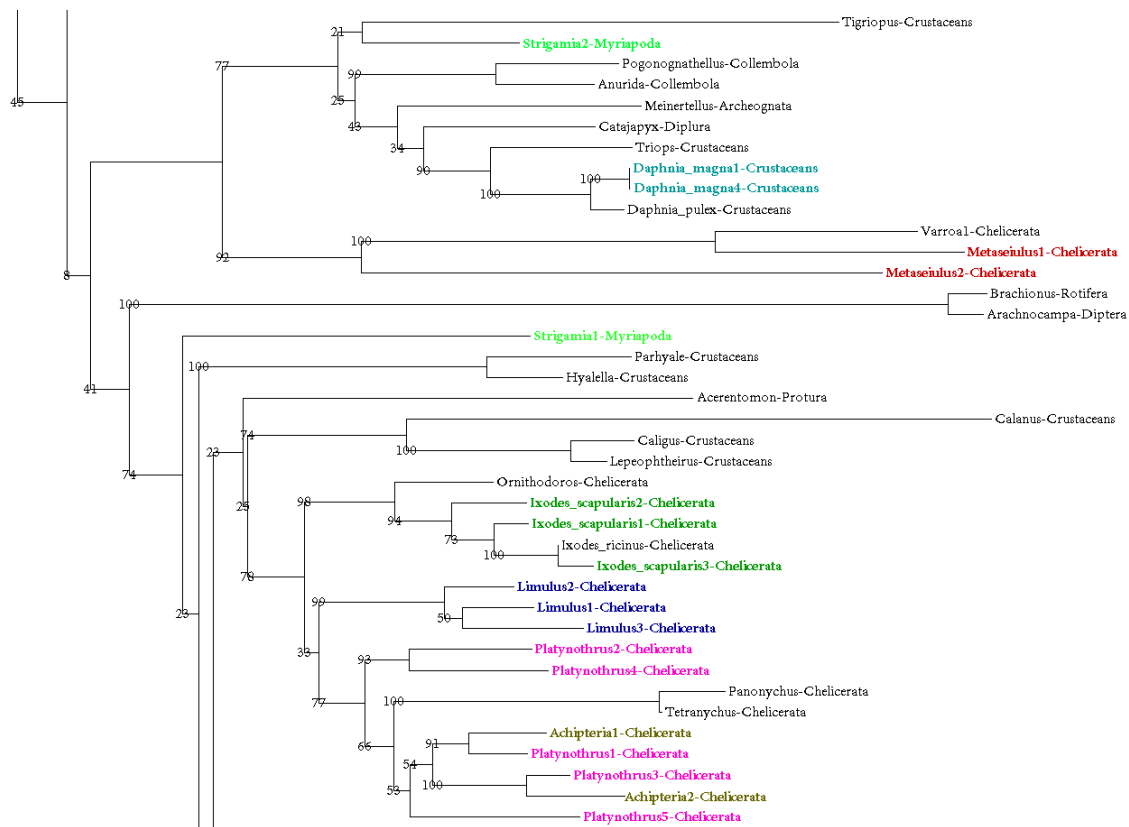

(B)

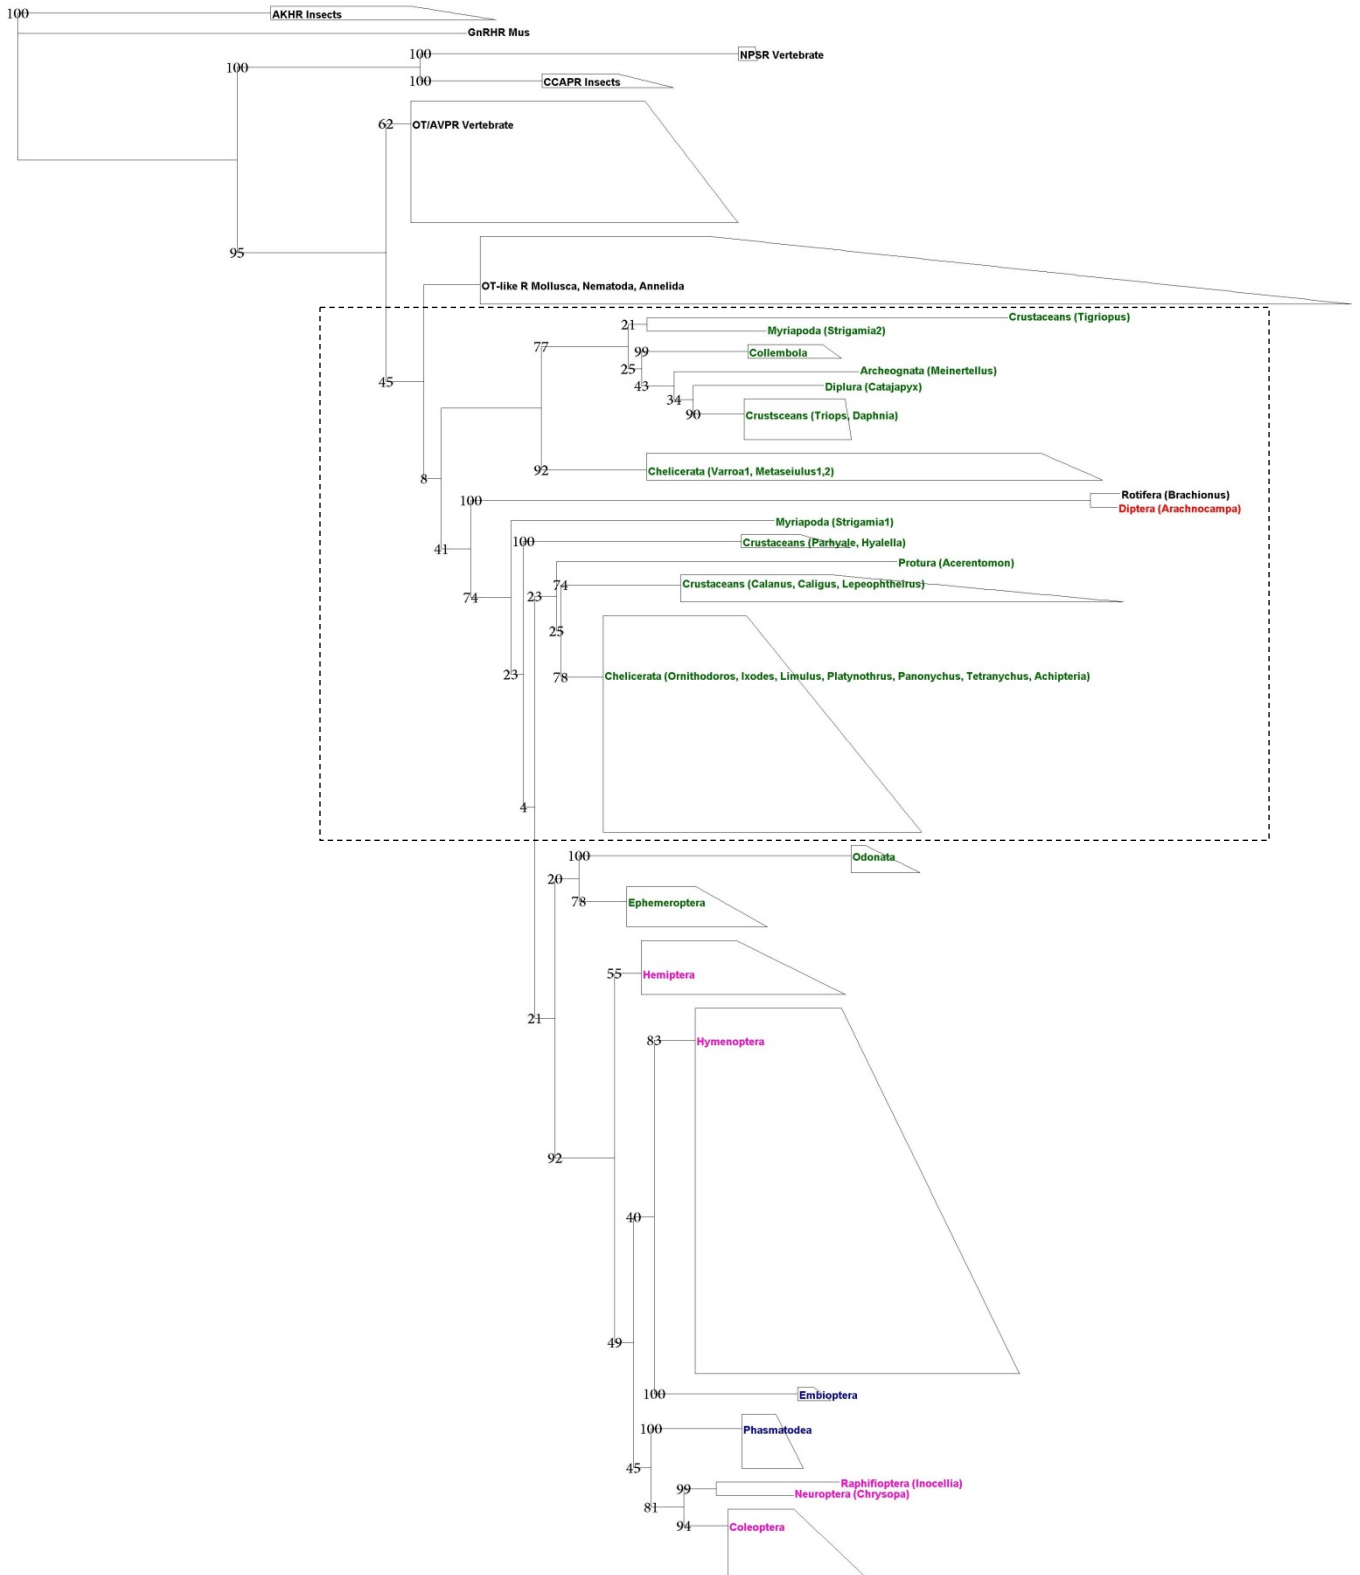

**Supplementary Figure S6. Alignment of selected inotocin-like receptors and precursors.** *Arachnocampa luminosa*<sup>2,3</sup> (New Zealand glowworm) is the only exception among numerous transcriptomes and genomes within Diptera, where both an inotocin-like receptor (A) and precursor (B) were identified. The sequences are shown as alignment in comparison to *Tribolium castaneum* and *Brachionus koreanus*. Two hypotheses could explain why *A. luminosa* stands out of this group: (i) the inotocin signalling system was re-acquired through horizontal (lateral) gene transfer; or (ii) there has been a sample contamination during the production of the *A. luminosa* datasets. Utilizing the phylogenetic tree of inotocin receptors, it is evident that *A. luminosa* is forming on a separate branch distinct from other insects receptors with a 100% confidence value (Supplementary Figure S5). Therefore we performed tblastn searches against the eukaryotes Transcriptome Shotgun Assembly database at NCBI and the first hits for both oxytocin-like peptide and receptor were from *Brachionus koreanus*, a planktonic microorganism, which belongs to the class Rotifera<sup>4</sup>. Although evolutionary distantly related to insects, the observed identity and similarity is between 81-91% for both peptide and receptor, but the identity and similarity to *Tribolium castaneum* sequences are only 27-37%. To verify if the putstive inotocin precursor and receptor are unique among other *A. luminosa* genes we performed a pairwise blast between *A. luminosa* and *B. koreanus* transcriptomes. We have found 11106 hits (out of 196675 contigs/transcripts; 5.6%) *A. luminosa* versus *B. koreanus* and 8455 hits (out of 28660 contigs/transcripts; 29.5%) *B. koreanus* versus *A. luminosa* with a very high bit score (>400). Moreover after checking the *A. luminosa* transcriptome for universal single copy genes on metazoa level we discovered that the glowworm transcriptome contains a very high number of duplications (82%), which has been illustrated by genome and transcriptome parameters of *A. luminosa* and *B. koreanus* transcriptomes on metazoa level (C). These findings strongly suggest a contamination of the *A. luminosa* sample; however horizontal gene transfer of large amounts of genetic information from some *Brachionus* species cannot be completely excluded because (i) the main cause for both to occur is the same: two species should meet each other physically (which could happen between *A. luminosa* and *Brachionus* species because the latter species is spread all over the world in fresh and semi-fresh water<sup>4</sup>); (ii) contamination of the samples especially of transcriptomes is a common problem in horizontal gene transfer studies<sup>5</sup>; (iii) the big transfers between species are reported before (entire *Wolbachia* genome >1 Mb was transferred to *Drosophila ananassae*<sup>6</sup>) as well as more and more evidence of horizontal gene transfer in insects accumulated during the last years<sup>7-10</sup>. Therefore the question remains open if the inotocin signalling system identified in *A. luminosa* is due to horizontal gene transfer from some *Brachionus* species (Rotifera), or it is an artefact due to sample contamination.

**(A)**

```

Tribolium      ---MY---TPKLSQMDISENS--TYLFDKHE--DRNNTDRDENLARVEVATLAIIFLVTV
Arachnocampa  -MTSYQENILPNYSEQDKFEN--SNVSLNNSNSVQQFQLNSSLLTKIEVFLLSLFLLTV
Brachionus     MTSSYQENMLLDYSEQKKSEELQNLSPNNSDSSEQFQINNKLTLQIEVFLLSCLFVLTV
               *      . * : . * : . : : : . : . . . * : : * * * * * * : : : : * *
Tribolium      IGNSTVLLALWTRR-----RYAGRKKLSRMFYFFILHLSIADLITAFLSVLPQLAWDI
Arachnocampa  IGNLIVILIIILLYRNMSPKRARWFKLNKNI SRMSFYIIHLSIADFNVAFMSILPQLIWRQ
Brachionus     IGNLTVILIIILLYRNMSKRRARWFKLNKNI SRMSFYIIHLSIADLNVAFMSILPQLIWRQ
               *** * : * : *      : . : * : * * * * * * : * * * : * * * * * *
Tribolium      TYRFYGGFLLCKVVKYQTLGPYLSSVLMATAIDRHQAICYPLTYCSWTSRRSKVMVYL
Arachnocampa  SVVFNHSHFLCKFVAFSQVFSVYASTFLLIVMAYDRFKCICWPIKSCSWNRRHALVPVFF
Brachionus     SVVFNHSHFLCKFVAFSQVFSVYASTFLLIVMAYDRFKCICWPIKSCSWNCRHALIGIFV
               : * . : * * * * * : * : . : * * : * : * : * * * * * * * * * * : : :
Tribolium      AWWASLAFICIPQLTIFTYTSVGEDEYDC---WATFQEPWGRAYVTWYSISVFMVPLVVL
Arachnocampa  SWLIAAVVSSPQLFLFKIQHMSVQHYTVETCSVKWLSKKEGLYLLPHMSTQFLIPLFVL
Brachionus     AWLIAATISSPQLFLFKIQHMNAHVYTVETCSVKWMSKRHEGLYLLPHMSTHFLIIPFVL
               : * : . . . * * * * * : . : *      . . . : . : * : : : * : * : * *
Tribolium      IFTYTSICIEIWQSSSESS--LR-PRSSQK-----
Arachnocampa  TFLYSRIFMTVSNIKQKHASIRFERESSKTATEINQLNRENSLNTQNGLITEVKHDSDN
Brachionus     TYLYSRIFLTVSRNISRKHASVRFERESSKTGTEINQLNRENSLNTQNGLITEIKNESEN
               : * : * : : : . . . : * * * * *
Tribolium      -----SA-----

```



```

Arachnocampa      SIFRDKKFGILWWIRSRFNKIRHKILFTSTKKRGKNIKFGKTGNFLMNDQTMPKEYEMR
Brachionus        SIFRDKKKTGLIILWLRSHFNKIRHKILYLTSTKSGKNIKFRSQNFSLNN-SLPKEYEMK
:
Tribolium         -----P---GKRTPLISRKINTVKQTIAVI
Arachnocampa     LMLKRKETSLSDS-EKYSMRLDKNSVYKSPKSNFPPIRQTFSGKALTRSKIKTLKLTITVV
Brachionus       LMLKKNDPLESNDNRYSMRDLKNSVYKSPKKNFPPIRQTFGKALTRSKIKTLKLTITVV
:
Tribolium         VMYIACSTPFILAQWLWDP-----QSPFIDGPVF--VILTLLYSLNSCVNPWIYLA
Arachnocampa     ITYVMCSLPFYVCTFIHFLGLSAHNHSSLFTKTLVYITISTNMLFQLNSCANPFIYLPF
Brachionus       ITYVMCSLPFYVCTFIHFLGLSAHNHSLFTKILVFATISTNMLFQLNSC-----
:
Tribolium         NRELPRLLLRHYTASSKNYRSATGGNSASNSGDAQSTSLRPFRRWSLCNSARSNKYPTR
Arachnocampa     NGNICLAKRLKTKV-----
Brachionus       -----

Tribolium         VPHRPYVAQYNARRWIVTTTT
Arachnocampa     -----
Brachionus       -----

```

|              | Identity <sup>a</sup> % |              |            |              | Similarity <sup>b</sup> % |              |            |
|--------------|-------------------------|--------------|------------|--------------|---------------------------|--------------|------------|
| Tribolium    | 100                     |              |            | Tribolium    | 100                       |              |            |
| Arachnocampa | 27.5                    | 100          |            | Arachnocampa | 28.5                      | 100          |            |
| Brachionus   | 24.3                    | 81.3         | 100        | Brachionus   | 26.2                      | 85.2         | 100        |
|              | Tribolium               | Arachnocampa | Brachionus |              | Tribolium                 | Arachnocampa | Brachionus |

<sup>a</sup>calculated using BLOSUM62 matrix using alignment above at <http://imed.med.ucm.es/Tools/sias.html>

### (B)

mature peptide

```

Tribolium         -----MSTIITSIILLVLSSELVSGCLITNCPGGKRSKFAISENAVKPCVSC
Arachnocampa     MNENFLMMNLNDKKNLILFIVINLNVINACYITNCPWGGKRSQPFLDSENAHQCRKC
Brachionus       MNENNIMNLSDRKNLILFIVINLNVINACYITNCPWGGKRSQPFLDFENAHQCRKC
:
Tribolium         GPGQSGQCFGPSICCGP-FGCLVGTPELRCQREGFFHEREPCAGS-APCRKNTGRCAF
Arachnocampa     ASG-LGMCFGPRIICCGPDMGCLIDTKETSVCQLEDLKS-VPCQPYGKICDKVEFGRCAT
Brachionus       ASG-LGMCFGPKICCGPDMGCLVDTKESSVCQLEDLKS-VPCQPYGKICDKVEYGRCAT
:
Tribolium         DGICCSQDSCHADKSCASDDKSPIDLTYTLINQAEIAGDK-----
Arachnocampa     SNLCCNPEHCLEDSTCVSEENDYSEYKEIDTKLLKALKRLISKRRQKNEENYKSHNI-DN
Brachionus       SNLCCNPEHCLEDSTCASDDIDYSEYKEIDAKVLKAIKRLISKRRERNEKYDEGHISDK
:
Tribolium         -----
Arachnocampa     YQS--
Brachionus       YQSNF

```

|              | Identity <sup>a</sup> % |              |            |              | Similarity <sup>a</sup> % |              |            |
|--------------|-------------------------|--------------|------------|--------------|---------------------------|--------------|------------|
| Tribolium    | 100                     |              |            | Tribolium    | 100                       |              |            |
| Arachnocampa | 34.9                    | 100          |            | Arachnocampa | 37.3                      | 100          |            |
| Brachionus   | 37.7                    | 84.4         | 100        | Brachionus   | 26.2                      | 90.8         | 100        |
|              | Tribolium               | Arachnocampa | Brachionus |              | Tribolium                 | Arachnocampa | Brachionus |

<sup>a</sup>calculated using BLOSUM62 matrix using alignment above at <http://imed.med.ucm.es/Tools/sias.html>

### (C)

| File                                          | Complete Single-copy BUSCOs | Complete Duplicated BUSCO | Fragmented BUSCOs | Missing BUSCOs | Total BUSCO groups searched |
|-----------------------------------------------|-----------------------------|---------------------------|-------------------|----------------|-----------------------------|
| short_summary_arachnocampa_luminosa_met       | 67%                         | 38%                       | 5.2%              | 27%            | 843                         |
| short_summary_arachnocampa_luminosa_trans_met | 98%                         | 82%                       | 1.0%              | 0.3%           | 843                         |
| short_summary_brachionus_koreanus_met         | 57%                         | 10%                       | 10%               | 32%            | 843                         |
| short_summary_brachionus_koreanus_trans_met   | 70%                         | 15%                       | 13%               | 16%            | 843                         |

**Supplementary Data S1. Putative inotocin precursors.** Sequences of 144 novel inotocin precursor sequences from Arthropoda are shown. Inotocin-like peptides are highlighted in yellow. (A) 75 newly annotated precursor sequences containing the inotocin-like peptide domain. (B) 35 deposited inotocin precursor sequences derived from NCBI containing the inotocin-like peptide domain. (C) 23 newly annotated inotocin precursor sequences containing the neurophysin domain but lacking the inotocin-like peptide domain (the first sequence of *Ceratosolen solmsi marchali* is from NCBI). (D) 11 non-annotated inotocin precursor sequences presented as BLAST search results. Sequences from (A) and (B) were used to prepare the alignment illustrated in Supplementary Figure S1.

**(A)**

```
>Symphylella_vulgaris
MSSGKSDITNAFVLLTFVSTVSACFITNCPIGGKRSSGHSLSSSVALRQCSPCGPGGAGRCFGKSACCVPGMGCFLGPAHTATCRLEHSYPVPCDNGTPACG
ENGNGRCAVEGLCCTGDGCFYEDTCRDSLLTSSLHHSGSTLEDETTQ-
>Strigamia_maritima
MKSTHFVNIIFYSVFIFIMADGCYITNCPPGGKRSSGNEKSGRGRVQCTPCGPGGIGRCYGPDICCGANVGCVFVTRESAICRLENLYSLPCQNEGRACGTD
GTCSADGFCCSTDQCKADESCRGVVHTNLQRVLDGEIDLNDVMGPQR
>Litopenaeus_vannamei
MQISAVVAMALLLGSGTACFITNCPPGGKRSSSPAQLGSVRTCAQCGPGLQGRCMGPDICCGPEIGCYMGTTREAFLCRSENLVPVTCSNDDLKACGRQREG
RCASSGVCCEVKECFDINCVIEGVDRHRYSLDLTLEAQWRI-
>Lepeophtheirus_salmonis
MAFGYPLITLLLIFQIANACFITNCPVGGGKKGSGSTNLGFLNSSFQYKQCSSCGPNNTGRCFGPRLCCSSEFGCFVYSNDIAKNPCQTEAYDPVPCQNNV
KCSSSVLKNGQCVFDNYCNSSGTCRFVEEELICSVSDDKKNYEKEKELVDDLQKNMIYIRRQAYLGNGPRLQQLNINDLEQ-
>Calanus1_finmarchicus
MITSWKILDPRIRRSWSFLILLAQTMSASHGCFISNCPVSGKKRSVGEEQMVSFQAREEVLACPSNPAGLCYSPGLCCVQGGCYADKGCLPQMEESRENR
VEPRLNKRDLRFLYGWAPAHEKMFGQTGFSIPCIGPYCNGNEKMIRKEKQSQEKKSDDKVLDGSSNYDSLVYNENLSNQRCNWMDLYLAR
>Caligus_rogercresseyi
MALCLLQVTESCFITNCPVGSGRKRADPGLFSPKNRRQLDECSPCGPSNEGRCYGNLCCGSTFGCFVYAKSLQHQNPCLTEARLPPCRNKGSGCSGILE
NGQCVFFENYCCSPSGTCRFVDESICSNSTVPQLGSDDFMEDFRRLFLARELHSL
>Tigriopus_californicus
MQITFDRRCFIVLGLLSLLKAVSVNSCFITNCPSGGKRSELLTVASRKCPCGPGLMGQCFGPSMCCGQYIGCHLNTPDTQVCKTENSNPIPCDNDVPRC
QSVRRGFCATNGFCNDQGECTPEEKVENLSDFPSPFILRRHLSSASLASRPTVEKAMITIPQPNKAYQEALNLMQIIPKSNALNKYLSRHGDVK
>Speleonectes_cf_tumulensis
MHLRPMDVLLSALCVLHVAGISTACFILDCPLMIRNRTVRTLKSSTRQCTSCGPDDLGRCYSPNICCGPESAATSAPKNRRLPVRELLPCSL-
>Sminthurus_viridis
MINLNCGICLFLITLSVVTGCFITNCPPGGKRSGIERKTRQCEQCGPPGAGRCYGPSICCSPELGCLIATPETYSCOLENRHTTLCQNPGATCAGPNGDI
SGGQCGAEGICCNSETCTMDETCHDEASVTRESVAKLSGLYHHRYPLDVVFQRFVDGQHSQHHRLPARLPLPTQSSSSSNDY-
>Anurida_maritima
MRKYHTSIICLVWLISVSAAFGCFITNCPPGGKRSGPLSTQARQCESCGPEGSGRCYGNICCSPSGCLIGTPETVACRSEARFSTPCLNPGISCSGSG
SLSIKGQCTGDGICCSSETCHDENCWERSMTSGTGSQEFNQDLPLREDRFLIPLPATHEKFRSFPISQIIRVGRRKNQFEDLRNHLLHRPQMDFQPPIS
STESLYP-
>Pogonognathellus_sp
MIQFVTYNLWLGLLVSFVAASGCFITNCPPGGKRSGTALTVRQCERCGPPGMGRCFGPQICCSPEFGCFFSTAETFVCLENRFPTPCHNPGSSCSGN
GDTGLINGQCG
>Folsomia_candida
MKTSLLFAFGIVMVESLLVSGCFITNCPPGGKRSGADTKIRQCEQCGPPGMNGLCYGPHICCSSELGCLFGTSETLTCFQENLMYNTPQNPGESCSGNDA
TNPINGQCATLGVCCSSDCTTIDDNCHKKDEQQVNSGHSRSTVAMDGSHTKEHATTMFQNPLDRWIPRRFGLGRPTQRKHVRIGVKPDAQILAPENSLMD
RLVIFPDTSGRISSDEY-
>Occasjapyx_japonicus
MSSPVRIHPRLLALACVFCISSACFITNCPPGGKRSQAHYKPQASRQCAVCGPNGQGRCFGPELCCGPEIGCYMRTRESSCRAENLFPVQCENRARPCG
SERSGKCAAVGICCTEDSCTSDQTCRASPGKEAVAAVLPRGPSRPQLPSDLVSFLEEVDNMAPASGSEV-
>Meinertellus_cundinamarcensis
MKSSMSTPAALFALLFVSITSSCFITNCPPGGKRAMGAPGRVQRQCPSCGPHRSGRCFGPDLCCGEGFCHLGRDPVCRGEMSAPGLCTNPGRPCGVG
KCAAQGVCCSETACALDSMCLDSWPSRNVVQMNSGLASVLENMLEEVPSENGDDK-
>Machilis_hrabei
MSADMTNSASSTFALFTLLLVGCVTSCFITNCPPGGKRGLSGPGRGEPRQCPSCGPHRSGRCFGPDLCCGDFGCRLGARDASCREMSAPGLCINQGRP
CGVGVCAAQGVCCSETSCALDASCMDSWSPRQLVPVNNGLSSVLENMLEDIPMESGDDRR-
>Tricholepidion_gertschi
MVARKNPQTVVICLMAAMSAATACFITNCPPGGKRSMGQVGTHATRECTSCGPAKLGRCYGAICCGPQIGCLVGTREAAVCQTENFYVPPCANRGGQCGG
ESGRCAATGVCCTEESCSIDPSCHVTPQETILTPVSRQMYPINSAMNNYLEAVDALPSHVILENRR-
>Eurylophella_sp
MVHRRGATLSAMLIVHVSACFITNCPPGGKRSSITTVNARQCSRCGPGLSGRCFGARICCDSRRGCMLASSTEPSLLPCLAESMQTTPCRNRAASCGQS
GAGQCASQGICCLQDSCHADVKCHENYD
>Apachyus
MSFSLRFFAIFLLLCLGTGCLITNCPKGKRTSITVSFILKF
>Gryllotalpa_sp
MKVYLLVFISLIVLNTACMINCPRGKRAMKINEISSIRSCARCGLNNAGHCYGPDICCAPELGCLIATPETVPCQEESSQSPDPCIDTDLGPACHNGK
HCGANNICTQDSCYSDQTCFGFPVE
>Teleogryllus_commodus
MAQFKLYSNIIVLMMILTFSCACMINCPRGKRSAMENNEILPIRNCARCGPNNTGHCYGPSTCCAEELGCLMGGPEAKPCEAEALSPDPCVEPALGPRC
FGGQGFCATSTLCTQVSCHTDPSCQFAVAGHKSVGATDLALPHRSYVYSLLNALAKNQDHNPQNVE-
>Locusta_migratoria_manilensis
```

MKPQLAVLLALVVSLAAA **CLITNCPRG**GKRASLQHRCAACGPGQGVCLGPHICCGPRMGCRLASADADSAACRAAPPCLDSEMERCAAGRGRCSAPGVC  
CSQDSCHIDPSCVADTTEPADRYALDIFAVNDGDRDDMRI-  
**>Galloisiana\_yuasai**  
MRLKQCLRMLALLVAVVGISSA **CLITNCPKG**GKRALNHSKDSVRQCPRCGPAKLGHYGPAAICCATQFGCLVATADTAICQGESLYPEPCANTMPASSCRG  
EAGKCAANGICTSESCHVDMSCLRTSRGEDDVIQFPDLSSDAKGVFSLFNLGSYEPDHQAYRLPSNVERD-  
**>Haploemia\_palau**  
MINFRFARFILLITLAAVCTA **CLITNCPIG**GKRSLHLGTESVRQCPRCGPAKLGHCFGPTICCGHEIGCLINTPDLVCLKEHLSPPDCVGPATATNCGNRK  
GKCAADGVCCTPESCEID  
**>Aposthonia\_japonica**  
MVNFRFARFILLITLAVVCTG **CLITNCPKG**GKRSLAHGSESLRQCPRCGPAKLGHCFGPTICCGHEIGCLINTPDLVCLKEHLSPPDCVGPASASNCGNRK  
GKCAADSI CCTPDSCEIDASCRFGSPQHFRNVGIYPQYVE  
**>Cryptocercus\_wrighti**  
QLGTLATLAILLIGVCTA **CLITNCPKG**GKRAGSHSQDSHPIRQVFLGYLTTLTYQLLSL  
**>Zootheropsis\_nevadensis**  
MKMQLGTATLLAVFISLCTA **CLITNCPKG**GKRAGTHSQELHTIRQCARGPAKLGHYGPAAICCGPQIGCLVATPDTARCLSEAASVPCTAPTGAQCCEG  
KFAGRCTANGVCCTHE SCHIDITCQLTTSDAPELIDVSADQTNPLYSLYSSYQENPGLGLSE-  
**>Gynaikothrips\_ficorum**  
MICVKIPSI FLLLAMTSA **CLITNCPRG**GKRNGARPPTKGSIEELPFCTLCGPPGLGGLCFGPTMCCSPTGGCELGEPHVASCLGVHTVPPCLRLPPQSM  
LNGPYSAPSQTRATSLVTTTCGSGICAANGLCCTSDWCRADDRCLSSASQSNLVI PDHNL PANTRQEPQQA EFNWDHWS-  
**>Halyomorpha\_halys**  
MYRALLFLTALCLVQSC **CLITNCPRG**GKRSLRPLGRDPDCRRCGPLEGRVCGKTVCCGPRIGCLIGTPAVLSQCAA EPMQLRGGQRCSIGVCLADGVCCSP  
DGCKMMSCEVEQSV DVC SLAEQQVY-  
**>Diaphorina\_citri**  
MYAMISRLVVCLVGVYFFGSTW **CLINNCPTG**GKR SALMALEERRQSHQKRAKLWNRNI ISCNAWGAEGVCGPLCCDPSRSEGDGPKSGVDYKTCGS  
SREVMEEYALCLSKGLACDLNLTLCNMYAIKVPTEVKLQLHQ-  
**>Liposcelis\_bostrychophila**  
MNTFQFVVLYIFVNSVNS **CLITNCPRG**GKRGDSENNLIEAPRSDIKTCTPCGPNNQVGCIGRDI CCGKHLGCLISSPSTKICRRVREFPESCLSSFNPCGN  
GGLCVARNVCCFKNLCRIDDTCTIPYVDLGYRLGTSDILNRLSSYSVDYPLELPSNMPIGSTSLDEVWGSKEDSIVPNYNFKIEAS-  
**>Menopon\_gallinae**  
MYNIFQFQLRLGLLVATFGLVVS **CLITNCPRG**GKRGDNSLDKTSYSPDTNYCIPCGPDDQVCLGKNVCCSREGCTTRSRYTDP CRSIQNTRISCLSEVNV  
QTCGDKGRCKAKFICCSRQCVMDLSCKSMPPAKYRDVNE  
**>Cotesia\_vestalis**  
MMHKFLLVFFFITSSFA **CLITNCPRG**GKRGESPLLSMPSLIKECSSCGPDQGCQFGPHICCGASIGCYIRSPETYKCRKESLHSHPCVSGFAMCRDNTAR  
CAANGICCSQESCFDSSCKIGDEFSLDRKIDQEF SRLIGENDQMIN-  
**>Nasonia\_giraulti**  
MSKVIIVLTTLVLSYSG **CLITNCPRG**GKRGDPTFLENIARECPACGREGQRCFGPHICCSPSMGCLIGTPETLRCRKESSLYRSPCVAGFAMCQNGSGRC  
AANGICCSQESCFIDSACKLVDETGNDRI GA EFGAFLEENAGTNEHIL-  
**>Chrysis\_viridula**  
MQYKMLTKLILFASMFVYVYG **CLITNCPRG**GKRGD SAVTLDHLARECPSCGNRLGQC FGFPHICCGPSIGCFIGTPETYKCRKESLFSRSPCVAGYAMCRGN  
SARCAANGICCSQETCHMDSTCRISD VDRDRKEEGVDVA AVLSDNELSADSVQ-  
**>Polistes\_metricus**  
MTKILIFTSFIFISSA **CLITNCPRG**GKRGDIEVPESPIRECLPGPSQLGQC FGFPHICCGPTFGCHIGTSQTQKCRKEQFDSSPCMAGFAMCNGKGRCG  
AGGICCSQDSCFIDPSCRFSTVDSPPFRSIDS DLKAIASEIEILKEAK-  
**>Mischoyctarus\_flavitaris**  
MTKQILVITSFILISSA **CLITNCPRG**GKRVDNKVPLVTTTEYPVKDCISCGPNQGQC FGSNICC GPTFGCHMGTSYTKCRKEFS DQISCLSGFAMCSG  
NVGRCAAIGICCSQESCFLDPICRLSDNLPVGRKFNT  
**>Chyphotes\_mellipes**  
MAKELFVFAALLVVAYG **CLITNCPRG**GKRGGGKHGEVVP AFEDVRVTR ECPSCGNRLGRFCGPRICCGPTIGCFIGTPETYGCRGEGSPFSKPCVAGYAM  
CRRNTARCAASGICCSQESCHIDASCRLSETSDGGGGNGHERRFSDLSAILSENVGTSVEMVR-  
**>Pseudomasaris\_vespoides**  
MAKELIVLIAIVVLASA **CLITNCPRG**GKRGDIAALESVVRECPACGNRSQC FGFPHICCGRTIGCYIGTPETYRKRKESLFSRSPCIAGYAMCRGNTARCA  
ANGICCSQESCFIDNTCRIPDIMAKDQKIDSDINMIFGENEISNELTQ-  
**>Brachycistis\_timberlakei**  
MLKKFILIAILISLSYSG **CLITNCPRG**GKRGEAVVSLETIARECPSCGNRAGQC FGFPHICCGPTIGCFIGTPETYRKRKESLFSRSPCIAGYAMCRGNTAR  
AANGICCSQESCSMDAMCKIPDALRHDRKFDSDVSSILSEISEISNEII  
**>Crioscobia\_alcione**  
YGC **CLITNCPRG**GKRGEIAPLLESVARECPSCGNHSGQC FGFPHICCGPNIGCFIRTPETYRKRKESLFS  
**>Telenomus\_podisi**  
MIAWVIVLVSIFSLSSA **CLITNCPRG**GKRADQSLMLMETSIRECTSGRDGSGRCFGPYICCGSTIGCFIGTPETYKCRKESLYSKPCIAGFAMCRGNKGR  
CAANGICCSQEACYAD  
**>Corydalus\_cornutus**  
MYPVVKYFVLVIVLVSVMIDS **CLITNCPRG**GKRNGSDRI SNEQFIKQCISCGPQRSQC FGFPSICCGSFGCLVGT PETVR CARDGGFHEPEPCIAGQASCR  
GDSGRCAADGICCTQESCHTDSSCAFDEERHDSHNGRPAIPIESIFSVLSPYRS-  
**>Aleochara\_curtula**  
MFSSKCLLIVGLACVVLQAVDG **CLITNCPRG**GKRSGKYLDPNNIKPCIACGPGHSGQC FGFDPICCGPFGCLLGTHTETARCRDGNFLEPEPCIAGNASCR  
RNSGRCAAEGICCSQ  
**>Meloe\_violaceus**  
ATNKFLLVLI VLTIFTNYFING **CLITNCPRG**GKRGNTRYLQKDTQIKQCINCGPNNGQC FGPQICCGPFGCLFNTIDTVRCQKDNFHFQHEPEPCIAGFMNC  
HHYNGRCATDGI CCNQDSCHIDKTC SITTTFIGFIENEKTRNFLETSPADLYNFINYQSELNSE-  
**>Priaema\_serrata**  
AFFVLNSFLADS **CLITNCPRG**GKRSRNYEENIKQCISCGPAHSGQC FGFPNICCGLFGCLIGTSETIR CQREGFFHEREPCIAGNAFCRKKHRTMCQRGHML  
HARLLPHRQNYAHLTTNKQN-  
**>Gyrinus\_marinus**  
ALLDICDS **CLITNCPRG**GKRSGRSQHENNIKQCISCGPGRSGQC FGSNICC GPFGLMGTSDTIRCHREGYFQDSEPC  
**>Arachnocampa\_luminosa**  
MNLNDKKNLKI LFLVIVLNLVINA **CYITNCPWG**GKR SQPFLDSENAHQCRK CASGLGMCFGPRICCGPDMGCLIDTKETSVCQLEDLKS NVPCQPYGKI  
CDKVEFGRCATSNLCCNPEHCELDSTCVSEENDYSEDYKEIDTKLLKALKRLISKKRQKNENYKSHNIDNYQS-

>**Pseudomallada prasinus**  
MNNNSLKATIVTFVIFTTLVHS**CLITNCPRG**GKRSNLLDSKISTDSIKP

>**Atelura formicarial**  
**ACFITNCPGG**GKRSMGQMLHVNKQCTSCGPARTGRCYGPAICCGPRFGCLVGRDTRAVCQTFENFTVPVPCGNRGPSCGESGRCAANGVCTEETCTIDPSC  
RISNEDISSSRQMFPIITNSVSMYLEELNDDLPARVGSDDR-

>**Atelura formicaria2**  
SLSKGILSVTIFFLAVISVTTA**CFITNCPGG**GKRSMGQMLHANKQCTSCGPARGRCYGPAICCGPRFGCLVGRDTRAVCQ

>**Solenopsis invicta**  
MLKELVVLASLI FLSYA**CLITNCPRG**GKRSDIAPSLGTVERECPSCGPNRLGQCFGPHICCGPSIGCFIGTPETYRCRKEISLYTRPCIAGYAMCHGNTARC  
ASNGICCSQESCHMDTSCRISDVVGNDRKLDANLNVIIFPDNEVSSDILQ-

>**Ixodes ricinus**  
MALSHMLLLAVVGGTSA**CFITNCPGG**GKRSSESPARLVSSQFRSSLTVSWCSLLGVDFQRMSFYRMPDY

>**Scolopendra subspinipes1**  
HWLLFFYYIGMTSS**CFITNCPGG**GKRSLEGEHKRTLQCTACGPGSQGRFCGPDLCCEFFGCGYKLTRESAICRFENLSPICDNDVLSGPDGAKCAADGL  
CCSSDQCKMEERCR

>**Scolopendra subspinipes2**  
MRSSTCHWILYLSLVGLVSA**CYIINCIDNDG**RKRSIDHQKKAIRQCMSCGPGMKGRFCGPDLCCEFFGCGYKLTRESAICRFENLSPICDNDVLSGPDGAKCAADGL  
NCAVDGLCCNTSQCKRDERC

>**Lithobius forficatus**  
MASHAAQSSVFLVLLCVFHITLA**CFITNCPGG**GKRSLEGDQKGTTRQCTACGPGGLGHCFCGPNLCCGPQIGCFLHTRGKCHLPF-

>**Homarus americanus**  
MQLGVVVVMTVVVGGSTTA**CFITNCPGG**GKRSGPATAQLGRTRTCTACGPGLOGRCLGPEICCVLIGICFLGTREARMCHAENLVPTCANRDLKSCGRMQE  
GRCAAAGLCCTEMKCEFDSSCTVEGREERVGKQRAERQHLTFLSSLPEQWNL-

>**Calanus finmarchicus3**  
MITSLKILDPSIRRSWRFLMILLAHTIIPDSHG**CFISNCPVS**GKKRSVGEQQLVSFQAREEVLACPSNPAGLCYSPGLCCIQGACYADM

>**Dermatophagoides farina**  
MFRRESFSMMKIILVLCIWIICLFNDVRCFITNCPRAGKRSIMTESNLGNSHKKKIKIKCTRCGSPLSGRCYGPNICCSPLTGCNVGGFTAARCSLEAYH  
PILCTNPGTVCGPNGKGVCALNATCCTNGKYFICFFYCKKN

>**Onthophagus taurus**  
MVKLIIFTLILCIIQDQLSHG**CLITNCPRG**GKRNGRINSLDTNLIKQICISGPARSGQCFGPGICCGPFGLIGTPDTLCKLKEGQFHENEPCIAGNSSCR  
NSGRCASEGICCTQGNF-

>**Nicrophorus vespilloides**  
MHSPPSTMFILKSSALLVLAVVFLGLD**CLITNCPRG**GKRAMQDNTIQICITCGPGRSGQCFGPGICCGPFGLIGTQETVKCQREGFFHGREPCIAGS  
APCRKNTGRCAAELCCSQGIIQLLLLLHLRLTHRLHHPMMI-

>**Oryctes borbonicus**  
MNSLLLIQVFCIAGDQLIEG**CLITNCPRG**GKRSKGMSHLAAANQCVSCGPGHTGQCFGPNICCGPFGLVGTAEHLRCQKDGFFHEAEPCIAGNSPCCRNT  
GRCATDGVCCSQGIRYIDS

>**Dendroctonus ponderosae**  
MTRSSSSKIAKMISQILMFILLSNILVSG**CLITNCPRG**GKRSKGKYLSTSNNIKQVIQFSLIQICICPCGPGGAGQCFGSPICCGPFGLIGTQETVKCQREGFFHGREPCIAGS  
EGMFHESEPCIAGNNS

>**Leptinotarsa decemlineata1**  
MVRSVPLTIIYLFIFVMYVES**CLITNCPRG**GKRGGEFSTSESNIKTVSINLNMYKHILQCISCGPGHTGKCFGPNICCGPFGLIGTQETVKCQREGFFHGREPCIAGS  
TEPCIAGFSTCRKNTGRCAAEEKICCTQGIWTFVFLVSN-

>**Leptinotarsa decemlineata2**  
MSKTVSLFTFLVSVFVIFVES**CLITNCPIG**GKRSKGKFLSTESNIKQICISCGPGHTGQCFGPNICCGPFGLIGTQETVKCQREGFFHGREPCIAGS  
TGRCATENICCTQGIKIRSYT-

>**Hypothenemus hampei**  
MVKRNQLICTAGSNSTKLSIFMACLITVSG**CLITNCPRG**GKRSKGKFLAVVLFKICPCGPGGTGQCFGPKICCGPFGLIGTQETVKCQREGFFHGREPCIAGS  
TAGTMNCRKNTGRCATNGICCSQKRTVLVNSSSVYN-

>**Anoplophora glabripennis**  
MFKNILLVSLVVFGEIFVNC**CLITNCPRG**GKRSKGKFGALEANIKFQCVSCGPGHSGQCFGSPICCGPFGLIGTQETVKCQREGFFHGREPCIAGS  
RKNTRCAIDGICCSQGNNSGFLKLNFLSLQILVMSTNNARWTKAGFFPITLWEWICII-

>**Agrilus planipennis**  
MYTNVCLVFVIVLVCYSLVFG**CLITNCPRG**GRKRNGKMEGDIQPVCTSCGPGLTQCFGPNICCGPFGLIGTQETVKCQREGFFHGREPCIAGS  
GRCATQGVCCNQKCFSTFYLLLNVLDISPYQGIIRKVVLLNKNLTVNGTLNIE

>**Homalodisca vitripennis**  
MRGAVVLTVCSLATA**CLITNCPRG**GKRSQSTIDNTLGTIVSLVACLRCGPGQLGRCLGPAVCCGPRGLVATPGIVRQCAGAAEGSPHKGKPCITPSGL  
GVCATDGVCCNSGGLYFSPQIRHIYRNFESISQY

>**Varroa destructor**  
MKLHVLVLANIVGLSLT**CFITNCPIG**GKRSDTGFLVQFSSDFRKCPCGPGSTGQCFGPNICCNSESLIDAGDSPHLRSCKREALKLPCTNTGMRCGS  
ENKGHCALNRFCCTS

>**Ephemera danica**  
MHRKYEMATKVYLTALIIVQVTTA**CFITNCPGG**GKRSSAVVSETQPKSVIRQFPITCSSYFVQCARGPGLTGRFCGPRICCESSRGCLLGSPLVFMFL  
PCLVESLQPTPCRNASNCGTDELCAAPGICCSQGK

>**Ladona fulva**  
MYSRQMSMDQRQWLLVAVIFALLGLTSA**CFITNCPGG**GKRSVAVFGRIPLRQVMVSSVLSFKCSRFCGGRFCGPAICCSLKTGCILAEKSNLPLLRP  
CAIEAGLPGACISGSKRCGNSGGRCASDGICCNDRKRN

>**Catajapyx aquilonaris**  
MSPFRVHQTLAVACIFCITSA**CFITNCPGG**GKRSQSHYKPAIRQVSSAQCAVCGPNGQGRFCGPELCCGPEIGCYLRTREASACRAENLFPVQCENKAR  
PCGSERSGKCAAMGLCCTEADSDTSACRGAPEVVAASRGQRQQLPSDLVSLFEEVVENIAPASAPEV

>**Blattella germanica**  
MQLALVFLVFCVACRA**CLITNCPRG**GKRAGVQSQDSTVSIQCARCGPAKLGHCYGPAICCGPQIGCLIAETPETTRCLSEAAASPSPTTPSGAPCGSGKNA  
GRCAANGVCTHESCHIDVSHPSATDIAIGNTDQLNSFYNLVNISSAYQENP

>**Pachypsylla venusta**  
MIPKIFFFLIFLFLNFSFS**CLISNCPKG**GKRFDKFKPQNKKEIFDKSKVSTLYIGD

>**Triops cancriformis**  
IHSAP**CFITNCPGG**GKRSFPMSSSQHFL

>**Brachionus\_koreanus** gb|GBXV01012066.1| TSA: Brachionus sp. 'koreanus' Rotifer\_07959 transcribed RNA sequence  
MNENNIMNLSDRKNLIILFILIVINLNVINA**CYITNCPWG**GKRSQPFLLDFENAHQCRKASGLMCFGPKICCGPDMGCLVDTKESSVCQLEDLKSINVPC  
QPYGKICDKVEYGRCATSNLCCNPEHCLEDSTCASDDIDYSEYKEIDAKVLKAIKRLISKRRERNEKYDEGHISDKYQSNF

**(B)**

>**Camponotus\_floridanus** Gruber, C. W. & Muttenthaler, M. PLoS One 7, e32559 (2012)  
MLKQLVICASLIFLSHA**CLIVNCPRG**GKRSDIASFLKTVTRECPTCGPNHMQCFGPRICCGPNIGCFIGTPETYRCRKEISLYTKPCIAGYAMCRGNTARC  
AANGICCSQ  
>**Limulus\_polyphemus** gi|926609726|ref|XP\_013784878.1| PREDICTED: conopressin/neurophysin-like [Limulus polyphemus]  
MHWTSFIMILGFCLAVTIK**CFITNCPGG**GKRSIGTFATHYTRECQCGPGGMGQCQGPDIICCSDFGCF  
IKTRESVICRYENLQVIPCNNKKGICETVPHGYCAAPGICCSAIQCAVDDCEPTGVLDKGVAYKYDHLRF  
VLLPWNMNGKLPD  
>**Ixodes\_scapularis** gi|506953581|gb|AGM20426.1| inotocin preproprotein [Ixodes scapularis]  
MALSHMLLLAVVGGTSA**CFITNCPGG**GKRSSESPARLCPRCPAGRGVCYSADVCCAGSMCILNDALAT  
LSCRAEALHGVAHVPGKRCGTDRCAIRGYCCGPDGCTKDSSCSGGVPTDQFGSAVDILEYGMSE  
>**Metaseiulus\_occidentalis** gi|391348425|ref|XP\_003748448.1| PREDICTED: isotocin-neurophysin IT 1-like  
[Metaseiulus occidentalis]  
MKLVALYFLSVSSLSWA**CFITNCPGG**GKRSAAFGQLYSNEYRRCPPCGPSSGQCFGPGICCTPDYCVL  
DPVGLSTCKSEALKMTPCNINRPRCGAENKGYCALNRLCCTSDSCTLDESSAKDRDILRESMLN  
>**Tetranychus\_urticae** gi|1005954275|ref|XP\_015785540.1| PREDICTED: neurophysin 1-like [Tetranychus urticae]  
MLASFIILLTFILNFHSSQA**CFITNCPGG**GKRSHGVDVDMRECLRCGPDNRGHCVSPNICCGTEFGCLINN  
HYSRPCRAENLIPTPCKIPGKLCSSGEGVCTSNIGCCNSDGCNDSTCENDKLSNMQRIFTS  
>**Nilaparvata\_lugens** gi|411530692|gb|AFW19795.1| arginine vasopressin-like peptide [Nilaparvata lugens]  
MKNTTISIGIMLFYAVGLAAG**CLITNCPRG**GKRGHLHSYMKKLAEEKMALAQVPLQCARCGPEGEGYCMGSP  
ICCGPQLGCLLASPATLNQCAGSVLPQSPNSPAPTCTYMPDGYGVCTDGVCCNSESCRIDPTCEVDPPH  
NVCNVWTEPKNMAL  
>**Dinoponera\_quadriceps** gi|951576040|ref|XP\_014485987.1| PREDICTED: neurophysin 1-like [Dinoponera quadriceps]  
MLRELVVLASLIFLSYA**CLITNCPHG**GKRGDIAPSLGVVTRCPLCGPNHLGQCFGPHICCGPSIGCFIG  
TPETYRCRKEISLYARPCIAGYAMCRGNTARCATNGICCSQESCHMDTSCRISDVVGNDRKMDTDLNVILS  
SNEVSHEILQ  
>**Monomorium\_pharaonis** gi|826427284|ref|XP\_012527594.1| PREDICTED: neurophysin 1-like [Monomorium pharaonis]  
MLKEFVVAFASLIFFSYGLITNCPRGGKRGDIVPSLGTVARECSSCGPNRLGQCFGPHICCGPSIGCFIG  
TPETYRCRKEISLYTRPCIAGYAMCRGNTARCALNGICCSQESCHMDTSCRISNVVGNQKLDLNLNVILS  
GNEISSEIPQ  
>**Vollenhovia\_emeryi** gi|795056828|ref|XP\_011871987.1| PREDICTED: neurophysin 1-like [Vollenhovia emeryi]  
MLKEFVIFASLIFLSYA**CLITNCPHG**GKRGDIAPSLGTVVRECPSCGPNRLGQCFGPHYICCGPSIGCFIG  
TPETYRCRKEISLYTRPCVAGYAMCRGNTARCASSGICCSQESCHMDTSCRIPDVVGNDRKLDANLNVILP  
GSEVSSEILQ  
>**Linepithema\_humile** gi|815804199|ref|XP\_012222809.1| PREDICTED: neurophysin 1-like [Linepithema humile]  
MLKELIVFANLILLSYA**CLITNCPHG**GKRGDIAPLETIARECPSCGPNHLGQCFGPHICCGPSIGCFIG  
TPETYRCRKEISLYTRPCIAGYAMCRGNTARCATNGICCSQESCHMDTSCRISNIVDNRKIDTDLNMIIPG  
NEVSSEILQ  
>**Atta\_cephalotes** gi|801367097|ref|XP\_012061245.1| PREDICTED: neurophysin 1-like [Atta cephalotes]  
MLKELIVFASLIFLSYA**CLITNCPHG**GKRSVAVSLRTVIRECPSCGPNHLGQCFGPHYICCGPSIGCFIG  
TPETFRCKESLYTRPCIAGYAMCRGNTARCASNGICCSQAFCHMDTSCRISDVVGNDRKLDLNVNVILPG  
EVSNEILQ  
>**Wasmannia\_auropunctata** gi|780704521|ref|XP\_011702880.1| PREDICTED: neurophysin 1-like [Wasmannia auropunctata]  
MLKELVVLMSLIFLSYA**CLITNCPHG**GKRNNIASLETVARECPSCGPNHQGQCFGPHYICCGPSIGCFIG  
TPETYRCRKEISLYTRPCIAGYAMCRGNTARCASNGICCSQESCNMDTSCRISDVVGNDRKLDANLNVILSG  
NEVSSDLF  
>**Pogonomyrmex\_barbatus** gi|769867110|ref|XP\_011645557.1| PREDICTED: neurophysin 1-like [Pogonomyrmex barbatus]  
MLKKIVVFASLIFLSYA**CLITNCPHG**GKRSDLAPLGNVRECPSCGPNHLGQCFGPHICCGPNIGCFIG  
SETYRCRKEISLYTRPCIAGYAMCRGNTARCASNGICCSQESCYIDSSCRISNAVGSDRKLDADLNVILPG  
NEVSNEMFQ  
>**Cerapachys\_biroi** gi|759033592|ref|XP\_011329433.1| PREDICTED: neurophysin 1-like [Cerapachys biroi]  
MLKELVVFATLIFLSYA**CLITNCPHG**GKRGDIAPSLGTVARECPSCGPNHLGQCFGPHICCGPSIGCFIG  
TSETYRCRKEISLYTRPCVAGYAMCRGNTARCATNGICCSQESCHMDTSCRISDVVGNDRKIDADLNVMFPG  
NEASSETFP  
>**Harpegnathos\_saltator** gi|749788059|ref|XP\_011147500.1| PREDICTED: neurophysin 1-like [Harpegnathos saltator]  
MLRELVVFASLIFLSYA**CLITNCPHG**GKRGDIIPSLGTVTRECPCGPNHLGQCFGPHICCGPTIGCFIG  
TPETYRCRKEISLYTRPCIAGYAMCRGNTARCATNGICCSQESCHMDTSCRISDVVSNDRKMDADLSAILS  
SNEASHEILQ  
>**Acromyrmex\_echinatior** gi|746868398|ref|XP\_011065328.1| PREDICTED: neurophysin 1-like [Acromyrmex echinatior]

MLKELIVFASLIFLSYA **CLITNCPRG**GKRSDIASLKTIVIRECPSCGPNHLGQCFFPYICCGPSIGCFIGT  
PETFRRCRKEISLYTRPCIAGYAMCRGKTARCASDGISSQASCHMDTSCKISDVGNDRNLDDNVNVLPGN  
EVSNEILQ  
>**Polistes canadensis** gi|954542367|ref|XP\_014601007.1| PREDICTED: neurophysin 1-like [Polistes canadensis]  
MTKKILIFTSFIFISSA **CLITNCPRG**GKRGDIEVPESPIRECLPCGSQLGQCFFGNICCGPTFGCHIGT  
SQTQKCRKEQFDSSPCMAGFAMCNGNKGRCGAGGICCSQDSCFIDPSCRFTVDSFRRSIDSIDLKAIAS  
EIEILKEEAK  
>**Microplitis demolitor** gi|665817708|ref|XP\_008557637.1| PREDICTED: neurophysin 1 [Microplitis demolitor]  
MNLPGTMIRKIFAVVFLSTSFAC **CLITNCPRG**GKRGESPLLSMPSLIKESSCGPNDQGCFFGNICCGPTFGCHIGT  
TIGCYIKGPETYKCRKESLYSHPCVSGFAMCRDNTARCAANGICCSQESCHVDPSCRVRGDEYLSERKISQ  
EFSRLIADNDQLIN  
>**Trichogramma pretiosum** gi|936696156|ref|XP\_014226062.1| PREDICTED: neurophysin 1-like [Trichogramma pretiosum]  
MLKVIVFVFMFLSLSHC **CLITNCPRG**GKRGDPTFFLENIARECPVCGHEEQGHCFGPHICCSPSMGCLI  
GTSETLSRCKESLYSRPCVAGFAMCQNNNGRCAANGICCSQESCFIDPACKLVDENNDRKIGAEFGAFLL  
ENSGRNEHIL  
>**Copidosoma floridanum** gi|936606102|ref|XP\_014216967.1| PREDICTED: neurophysin 1-like [Copidosoma floridanum]  
MLKVSLVLLALVSVAYS **CLITNCPRG**GKRGDPTFFLENIARECPACGHEEQGRFCGPHICCGPSMGCHIG  
TLETLRCKESLYSRPCVAGFAMCQNSGRCAANGICCSQESCFIDSACKLVDESGNDRKIGAEFGAFLL  
ENAGANERILR  
>**Athalia rosae** gi|817077789|ref|XP\_012261240.1| PREDICTED: neurophysin 1-like [Athalia rosae]  
MFQKTAIIILLVSSALG **CLITNCPRG**GKRNAGALLPLKNPIRECPACGPEMQGQCFFGNICCGPSIGCFIFG  
TAETHNCRKESLYSRPCIAGFAMCRGNTGRCAANGICCSQESCHADSNCVTDFFNANNQGISFDLNTLF  
SENTSLNDQ  
>**Fopius arisanus** gi|755956374|ref|XP\_011303419.1| PREDICTED: neurophysin 1-like [Fopius arisanus]  
MSKIIILMSALICMSSA **CLITNCPRG**GKRGENPLLSLHSLAAECPSCGPHGQGCFFGNICCGPTTIGCFI  
GTPETKYCRTESLYSRPCIAGFAMCRDNTGRCAANGICCSQENCHADSSCRVGEFSDRKIVQEYSRLSP  
ENE  
>**Nasonia vitripennis** gi|156543816|ref|XP\_001606547.1| PREDICTED: neurophysin 1 [Nasonia vitripennis]  
MSKVIIVLTTLVALSYG **CLITNCPRG**GKRGDPTFFLENIARECPACGHEEQGRFCGPHICCSPSMGCLIG  
TPETLRCKESLYSRPCVAGFAMCQNSGRCAANGICCSQESCFIDSACKLVDESGNDRKIGAEFGAFLL  
ENAGTNEHIL  
>**Orussus abietinus** gi|817209540|ref|XP\_012280828.1| PREDICTED: uncharacterized protein LOC105699950  
[Orussus abietinus]  
MKELLALYVLISAGYCC **CLITNCPRG**GKRSHHSESPETTIEKFFLAGLYDQSRYPVSLHVNVDQFIDSYARS  
ADTTKSATEACWENKEFLNDNGNQRKMKLTELFRKRRCKSKFINDTSPNLI  
>**Cephus cinctus** gi|1000762296|ref|XP\_015604200.1| PREDICTED: neurophysin 1-like [Cephus cinctus]  
MLKLCTVIMVFISISFA **CLITNCPRG**GKRSGAITSLENIVRECPSCGADKQGCFFGNICCGPSILGCLIG  
TPETHKCRKESLYSRPCIAGYAMCRGNTGRCAANGICCTQESCVDDTCRITDDVNDHRIISELNGFLN  
EGNVLADHNQ  
>**Neodiprion lecontei** gi|998512075|ref|XP\_015516596.1| PREDICTED: neurophysin 1-like [Neodiprion lecontei]  
MFRKIVVILFLVSSTLG **CLITNCPRG**GKRDGGFNFYQVRECSCTGPDQGCFFGNICCGPSIGCFIFG  
TAETHKCRKESLYSRPCVAGFAMCRGNTGRCAANGICCSQESCVDPNCKVRSDIQMSKQVTSFDMDKI  
YSESNLNDE  
>**Diachasma alloeum** gi|970901303|ref|XP\_015116397.1| PREDICTED: neurophysin 1-like [Diachasma alloeum]  
MSKIIILISALVCVSCA **CLITNCPRG**GKRGENPLLSLHSLAAECPSCGPHGQGCFFGNICCGTAIGCFI  
GTPETKYCRTESLYSRPCIAGFAMCRDNTGRCAANGICCSQENCHVDSSCRISDEFNDRKIQEYSRLSP  
ENEQ  
>**Polistes dominula** gi|972190475|ref|XP\_015176922.1| PREDICTED: oxytocin-neurophysin 1-like [Polistes dominula]  
MTKKILIFTSFIFITSA **CLITNCPRG**GKRGDIEVPESPIRECLPCGPNQLGQCFFGNICCGPTFGCHIGTS  
QTQKCRKEQFDTSPLAGFSMCGNKGRCGAAGICCSQNSCFIDPSCRFTFFDDWPGRQKIDSIDLKTIAS  
EILKEEAM  
>**Daphnia pulex** gi|321460843|gb|EFX71881.1| putative vasopressin-like neuropeptide preprohormone  
[Daphnia pulex]  
MAGLWTFCLIALSMTEMIPLTAKP **CFITNCPG**GKRSSQLVEPSSYLECAPCPGAGKGTCLGANLCCGS  
HFGCFFKTEETNVCLLTLNKSTQICNQHFWKTDLKSASCSLNGDKIDGICVADLLCCSLGNLPQDDL  
>**Tribolium castaneum** gi|145651811|ref|NP\_001078831.1| oxytocin/vasopressin-like peptide precursor  
[Tribolium castaneum]  
MSTIIITSIILLVLSLSESLVSG **CLITNCPRG**GKRSKFAISENAVKPCVSCGPGQSGQCFFGNICCGPFGCLV  
GTPETLRQREGFFHEREPCIAGSAPCRKNTGRCAFDGICCSQDSCHADKSCASDDKSPIDLTYTLINYQA  
ELAGDK  
>**Sarcoptes scabiei** gi|934146681|gb|KPL97556.1| vasopressin-like protein [Sarcoptes scabiei]  
MLFQQTNYLFRSISILVMIIVLIVENVRG **CFITNCPG**AGKRSMLAAIGSSTQTRRECIRCGPGLSGRCYGP  
SICCSPLFGCNVGGFASSRCALEAFNPMLCSNPGSACGPNKGKICAINSTCCTDSKI  
>**Daphnia magna** gi|941105145|gb|JAK93241.1| Oxytocin/vasopressin peptide precursor, partial [Daphnia magna]  
VKDVQSRVLFQDGLTTLPIKFKFLSSTCVKTKYIVLIMAALWTLCLIAFSILEMTMPSAAKP **CFITNCP**  
**PG**GKRSGHVSEDPSSFQVAEERPLLSHQCASCGPGGKGTFCFASLCCGSEFGCFKTNETNICLLTLNLK  
SSRSCDERFWQIYFKSAPCSLNGDKLDGICVADRLCCSLGQCKQNFAC  
>**Trachymyrmex zeteki** gi|1012971628|gb|KYQ46204.1| Vasotocin-neurophysin VT [Trachymyrmex zeteki]  
MLKELIVFASLIFLSYALITNCPRGGKRSDIASLRTVIRECPSCGPNHLGQCFFPYICCGPSIGCFIG  
TPETSRCKESLYTRPCIAGYAMCRGNTARCAANGICCSQASCHMDTSCKISDVGNDRKLLDDNVNVLPG

NEVSNEILQ  
 >**Trachymyrmex septentrionalis** gi|1009421053|gb|KYN39529.1| Vasotocin-neurophysin VT 1 [Trachymyrmex septentrionalis]  
 MLKELIVFASLIIFLSYA**CLITNCPRG**GKRSDVASSLKTIVIRECPSCGPNHLGQCFGPYICCGPSIGCFIG  
 TPETFQCRKESLYTRPCIAGYAMCRGNTARCASNGICCSQASCHMDTSCKISDVGNDRKLDNDNVNVLPG  
 NEVSNEILQ  
 >**Trachymyrmex cornetzi** gi|1009399678|gb|KYN19822.1| Vasotocin-neurophysin VT [Trachymyrmex cornetzi]  
 MLKELIVFASLIIFLSYA**CLITNCPRG**GKRSDIASSFKTVIRECPSCGPNHLGQCFGPYICCGPSIGCFIG  
 TPETFRCRKEKESLYTRPCIAGYAMCRGNTARCASNGICCSQASCHMDTSCKISDVGNDRKLDNDNVNVLPG  
 NEVSNEILQ

(C)

>**Ceratosolen solmsi marchali** gi|766922501|ref|XP\_011505828.1| PREDICTED: isotocin-neurophysin IT 2-like [Ceratosolen solmsi marchali]  
 MTNYPRGGKRAMFANPTFLLDKIAREFGPHICCGPTMGCLLGTPEAHHCQKESLYSQPYVAGFAMCRGNS  
 GRCAANGIMNIPKNHVSLIHAN  
 >**Frankliniella occidentalis**  
 QCTPCGPGGEGLCVGPICCSVFGCVLTSRGGCGRGAVFAPRCSPSSAALAAASAAVPLDAPCGADLTPDGSAPGRCAAQGVCTH  
 >**Oncopeltus fasciatus**  
 FLLLFKCKIYFFQQAFFPRCEPDEGRCLGRAICCGPKIGCLVGTTPAILSQCEQPPELPYSKPYSIGVCLSDGGLLFIG  
 >**Calanus finmarchicus2**  
**PVSG**KKRSLHVGEQVRDGLTCSNPAGLCYSPGLCCVQGGCYADGGCLPGLTERGEEQIKTRESVSKRGLRFLYGMAPSQMNLFQEGMAIPCIGPYCN  
 GKGARSHGKQKQRKRKQSQEHVNRDQALLGSSNYDSAVSDDQFLKHNCDDWMDLYLAR  
 >**Prorhinotermes simplex**  
 QCARCGPAKLEHCYGPVPAICCGPQIGCLVATPETARCLTEAASPVPCIAPTGVQCGEGKLAGRGTANGVCCTHKGQSSTMYCLYVFNQAQVQL-  
 >**Scylla paramamosain** gi|957760967|gb|ALQ28600.1| vasotocin-neurophysin, partial [Scylla paramamosain]  
 GRCVGPDIICGARIGCFGLSRETRMCRTEMVPICTYNSDLKPCGRMQEGRGAPGICCTENKCEMNDDCVAEDTQGEVEEESQRGGRPRLLDAAARDRW  
 EEQ  
 >**Ceuthophilus sp**  
 CARCGPAKLGHCYGAICCAPQFGCLIGTPTDTPCQREDQSPICIGTGSGPCRGEQGHCTANEVCCTQESCHIDPTCRLTLPAGGLPDGPDATTDLSDR  
 NLVYSLFNAISTYQ  
 >**Tentredo koehleri**  
 CPACGPDRCQCFGPKICCGPSIGCFIDTAETHKCRKESLYSRPCTAGFAMCRGNTGRCAADGICCSQESCQVDPNCKITDDSITS  
 >**Tetradontophora bielanensis**  
 IPEQHNTNKVRECASCSPVGGRCYGPETCCSPNFGCMVGTPTHTCLIEDRINSVCHNPGIPCTVNVNDNGNINGFCATG  
 >**Campodea augens**  
 GRCFSPDLCCGPEIGCYFRTEKSSVCKSENLFVPCENPAKSCGTRDRNGKAGQGLCCTEDSCTVDSSCHVILKDLPPPPAAVAPPSPWLKYPSVFRVLQ  
 QQQQPNTDLSATGALWDDMLE  
 >**Medauroidea extradentata**  
 VTHFNSSPGFKHKKPCRCGPAKLGHCYGDNICCGVEIGCLLATPDTQVCQRESMTPDPCVGPPIGGAPCGNSGKCAAPGVCCTPDSCTIDPTCHQTLISQEMA  
 SLYLYNAGNARGVSQISDVDDK-  
 >**Blaberus atropos**  
 IFFLCNVDIKIMHLKYLDTKQCRCGPAKLGHCYGPAVCCGPGQIGCLIATPDTARCLNEAASPIPCTA  
 >**Periplaneta americana**  
 GCLIATPDTARCLSEAASPVPCIAPTGAQCCEGKSAGRCTANGVCCTHGEASQNIYNLQYSFITSTTFLLPYLLEILKYISQ  
 >**Tetramorium bicarinatum**  
 GDIAPLGTIVRECPSCGPNHLGQCFGPHICCGPSIGCFIGTSETYRCRKEKESLYTRPCVAGYAMCRGNTARCASNGICCSQDSCYVDASCKNSDGVNRDQKF  
 DANLNEVLPGNEFSREIM-  
 >**Inocellia crassicornis**  
 FGCLVGTPTETIRCERDGAFFQEREPCIAGRSNCRGDTGRCAADGICCTQGNYE-  
 >**Osmylus fulvicephalus**  
 SVYFFGKSMYTLQICISCGPQRSQCFGPAICCGPFGCLIATAETTRCERDGAFFHEREPCIAGKSSCRGDTGRCAFDGICCTQGMCTVQLKGLKSLPNAIR  
 LI-  
 >**Lepicerus sp**  
**VNCPRG**GKRGELPFLSIQGLVKECQSCGPGHQGQCFGNICCGTNIGCFIGTPETYKCKMESLYSRPCIAGFSMCRDNNGR  
 >**Aethina tumida**  
 CVSCGPGHTGQCFGPSICCGPFGCLMGTSETIRCQREGFFQEREPCIAGSSFCRKNTRCAIDGICCNQESCHVDKHCLEKSSSENLMGMEL  
 >**Pogonus chalceus**  
 CIACGPGHSGQCFGNICCGPFGCLIGTSETLTKQREGFFQEPPEPCIAANGYCRKNTGRCAADGVCCTQ  
 >**Dastarcus helophoroides**  
 QCIPCGPARTGQCFGNICCGPFGCLVGTPTDIKQREGFFHERDPCIAGNSSCRKNTGRCAADGICCS  
 >**Diabrotica virgifera virgifera**  
 GQCFGNICCGPFGCLLSPETVRCQREGSHEREPCIAAGSFCRKNTRCATDNICCDQDSCYTRDQCSSDEKLKAEALSGLDIYNFLNTY  
 >**Baetis sp**  
 VAPAATASNLALLPCVAESLFPEPCSNPTVRCGRGAKGVCAAPGVCCFHNSCETDASCAKMRRVNIAIARESNAFA  
 >**Isonychia bicolor**  
 ACLQCRCGFLAGRCFGPRICCDTRLGCMVGSAMEPLQAEELLPCLAESIFPAACHNHAATCGRMATGQCAATGLCCYQDSCHPDMTCRGRSE

**(D)****Atta colombica** contig16192, whole genome shotgun sequenceSequence ID: [gb|LKEW01016192.1](#)|Length: 13960

Number of Matches: 2

Range 1: 8764 to 8997[GenBankGraphics](#)

Query: Polistes dominula gi|972190475|ref|XP\_015176922.1|

## Alignment statistics for match #1

| Score          | Expect                                                      | Method                       | Identities | Positives  | Gaps     | Frame |
|----------------|-------------------------------------------------------------|------------------------------|------------|------------|----------|-------|
| 96.3 bits(238) | 6e-23                                                       | Compositional matrix adjust. | 47/78(60%) | 56/78(71%) | 4/78(5%) | -2    |
| Query 41       | CLPCGPNQLGQCFGPKICCGPTFGCHIGTSQTQKCRKEQFDTSPLAGFSMCNGMKGRCG | 100                          |            |            |          |       |
| Sbjct 8997     | C CGPN LGQCQFPG ICCGP+ GC IGT +T +CRKE T PC+AG++MC GN RC    |                              |            |            |          |       |
| Query 101      | AAGICCSQ----NSCFID 114                                      |                              |            |            |          |       |
| Sbjct 8817     | + GICCSQ NSC ++                                             |                              |            |            |          |       |
| Query 101      | AAGICCSQ----NSCFID 114                                      |                              |            |            |          |       |
| Sbjct 8817     | SNGICCSQGKLNKNSCKLE 8764                                    |                              |            |            |          |       |

Range 2: 9826 to 9873[GenBankGraphics](#)

## Alignment statistics for match #2

| Score         | Expect                | Method                   | Identities | Positives  | Gaps     | Frame |
|---------------|-----------------------|--------------------------|------------|------------|----------|-------|
| 37.0 bits(84) | 0.025                 | Composition-based stats. | 14/16(88%) | 15/16(93%) | 0/16(0%) | -2    |
| Query 17      | ACLITNCPRGGRGDI 32    |                          |            |            |          |       |
| Sbjct 9873    | ACLITNCPRGGRK D+      |                          |            |            |          |       |
| Query 17      | ACLITNCPRGGRGDI 32    |                          |            |            |          |       |
| Sbjct 9873    | ACLITNCPRGGRKSDV 9826 |                          |            |            |          |       |

**Lasius niger** Lnig\_2.1\_6499, whole genome shotgun sequenceSequence ID: [gb|LBM01006435.1](#)|Length: 10190

Number of Matches: 3

Range 1: 5184 to 5393[GenBankGraphics](#)

Query: Atta cephalotes gi|801367097|ref|XP\_012061245.1|

## Alignment statistics for match #1

| Score         | Expect                                                      | Method                       | Identities | Positives  | Gaps     | Frame |
|---------------|-------------------------------------------------------------|------------------------------|------------|------------|----------|-------|
| 133 bits(335) | 4e-36                                                       | Compositional matrix adjust. | 60/70(86%) | 67/70(95%) | 0/70(0%) | +3    |
| Query 42      | ECPCGPNHLGQCFGPYICCGPSIGCFIGTPTFRCKRSLYTRPCIAGYAMCRGNTARCA  | 101                          |            |            |          |       |
| Sbjct 5184    | +CPCGPNHLGQCFGP+ICCG +IGCFIGTPT+ CRKESLYT+PC+AGYAMCRGNTARCA |                              |            |            |          |       |
| Query 102     | ASNGICCSQA 111                                              |                              |            |            |          |       |
| Sbjct 5364    | A+NGICCSQ                                                   |                              |            |            |          |       |
| Query 102     | ASNGICCSQA 111                                              |                              |            |            |          |       |
| Sbjct 5364    | ATNGICCSQG 5393                                             |                              |            |            |          |       |

Range 2: 4298 to 4423[GenBankGraphics](#)

## Alignment statistics for match #2

| Score          | Expect                                         | Method                       | Identities | Positives  | Gaps     | Frame |
|----------------|------------------------------------------------|------------------------------|------------|------------|----------|-------|
| 74.7 bits(182) | 2e-15                                          | Compositional matrix adjust. | 34/42(81%) | 39/42(92%) | 0/42(0%) | +2    |
| Query 1        | MLKELIVFASLIFLSYAACLITNCPRGGRSDVASSLRTVIRE 42  |                              |            |            |          |       |
| Sbjct 4298     | MLK+L++FASLIFLSYAACLITNCPRGGRSD+A SL T +RE     |                              |            |            |          |       |
| Query 1        | MLKELIVFASLIFLSYAACLITNCPRGGRSDVASSLRTVIRE 42  |                              |            |            |          |       |
| Sbjct 4298     | MLKELIVFASLIFLSYAACLITNCPRGGRSDIAPSLTALRE 4423 |                              |            |            |          |       |

Range 3: 5551 to 5664[GenBankGraphics](#)

## Alignment statistics for match #3

| Score          | Expect                                      | Method                       | Identities | Positives  | Gaps     | Frame |
|----------------|---------------------------------------------|------------------------------|------------|------------|----------|-------|
| 45.8 bits(107) | 2e-05                                       | Compositional matrix adjust. | 24/38(63%) | 33/38(86%) | 2/38(5%) | +1    |
| Query 113      | CHMDTSCKISDV-DNDRKLDNVDNVLPG-EVSNELIQ 148   |                              |            |            |          |       |
| Sbjct 5551     | C++D+SCKISDV NDRK+D ++N+I PG EVS+E+LQ       |                              |            |            |          |       |
| Query 113      | CHMDTSCKISDV-DNDRKLDNVDNVLPG-EVSNELIQ 148   |                              |            |            |          |       |
| Sbjct 5551     | CYIDSSCKISDVVANDRKIDADLNMIFFGNEVSSLELQ 5664 |                              |            |            |          |       |

**Cyphomyrmex costatus** contig18246, whole genome shotgun sequenceSequence ID: [gb|LKE01018246.1](#)|Length: 14919

Number of Matches: 1

Range 1: 12261 to 12491[GenBankGraphics](#)

Query: Atta cephalotes gi|801367097|ref|XP\_012061245.1|

## Alignment statistics for match #1

| Score         | Expect                                                    | Method                       | Identities | Positives  | Gaps     | Frame |
|---------------|-----------------------------------------------------------|------------------------------|------------|------------|----------|-------|
| 136 bits(343) | 4e-37                                                     | Compositional matrix adjust. | 66/79(84%) | 71/79(89%) | 2/79(2%) | -2    |
| Query 43      | CPCGPNHLGQCFGPYICCGPSIGCFIGTPTFRCKRSLYTRPCIAGYAMCRGNTARCA | 102                          |            |            |          |       |
| Sbjct 12491   | CPCGPNHLGQCFGPYICCGPSIGCFIGTPTFRCKRSLYTRPCIAGYAMCR NTARCA |                              |            |            |          |       |
| Query 103     | SNGICCSQAFCHMDTCKI 121                                    |                              |            |            |          |       |
| Sbjct 12311   | SNGICCSQ + SC+                                            |                              |            |            |          |       |
| Query 103     | SNGICCSQAFCHMDTCKI 121                                    |                              |            |            |          |       |
| Sbjct 12311   | SNGICCSQ--KLKNSCRF 12261                                  |                              |            |            |          |       |

**Cyphomyrmex costatus** contig15288, whole genome shotgun sequenceSequence ID: [gb|LKE01015288.1](#)|Length: 17512

Number of Matches: 1

Range 1: 12730 to 12858[GenBankGraphics](#)

Query: Atta cephalotes gi|801367097|ref|XP\_012061245.1|

## Alignment statistics for match #1

| Score          | Expect                                          | Method                       | Identities | Positives  | Gaps     | Frame |
|----------------|-------------------------------------------------|------------------------------|------------|------------|----------|-------|
| 75.1 bits(183) | 1e-15                                           | Compositional matrix adjust. | 37/43(86%) | 38/43(88%) | 0/43(0%) | +1    |
| Query 1        | MLKELIVFASLIFLSYAACLITNCPRGGRSDVASSLRTVIRE 43   |                              |            |            |          |       |
| Sbjct 12730    | MLKE IVFASLIFLS ACLITNCPRGGRSD+ SSLRT IRE       |                              |            |            |          |       |
| Query 1        | MLKELIVFASLIFLSYAACLITNCPRGGRSDVASSLRTVIRE 43   |                              |            |            |          |       |
| Sbjct 12730    | MLKEIVFASLIFLSSAACLITNCPRGGRSDISSLRTDIREV 12858 |                              |            |            |          |       |



**Nasonia longicornis** strain IV7(U) Contig18019, whole genome shotgun sequence

Sequence ID: [gb|ADAP01018019.1](#)|Length: 7333

Number of Matches: 2

Range 1: 6887 to 7273[GenBankGraphics](#)

Query: Monomorium pharaonis gi|826427284|ref|XP\_012527594.1|

Alignment statistics for match #1

| Score         | Expect                                                                                                                       | Method                       | Identities  | Positives   | Gaps        | Frame |
|---------------|------------------------------------------------------------------------------------------------------------------------------|------------------------------|-------------|-------------|-------------|-------|
| 126 bits(316) | 6e-39                                                                                                                        | Compositional matrix adjust. | 62/129(48%) | 81/129(62%) | 23/129(17%) | +2    |
| Query 42      | ECSSCGPNRLGQCFCGPHICCGPSIGCFIGTPEYRCRKRKESLYRPCIAGYAMCRGNTARC<br>+C +CG G+CFGPHICC PS+GC IGTPEY RCRKRKESLY+RPC+AG+AMC+GN+ RC |                              | 101         |             |             |       |
| Sbjct 6887    | QCPACGREEQRCFCGPHICCSPSMGCLIGTPEYRRCRKRKESLYRCPVAGFAMCQNGSGRC                                                                |                              | 7066        |             |             |       |
| Query 102     | ALNGICCSQ-----ESCHMDTSCKISNVVGNQKLDLNLNVI<br>A NGICCSQ ESC +D++CK+ + GN++K+                                                  |                              | 138         |             |             |       |
| Sbjct 7067    | AANGICCSQKRTSVINMFVKQEKYF*FP*IFLESQFIDSACKLVDEGTGDRKIGAEFGAF                                                                 |                              | 7246        |             |             |       |
| Query 139     | LSGNEISSE 147<br>L N ++E                                                                                                     |                              |             |             |             |       |
| Sbjct 7247    | LLENAGTNE 7273                                                                                                               |                              |             |             |             |       |

Range 2: 6694 to 6825[GenBankGraphics](#)

Alignment statistics for match #2

| Score          | Expect                                                                                   | Method                       | Identities | Positives  | Gaps     | Frame |
|----------------|------------------------------------------------------------------------------------------|------------------------------|------------|------------|----------|-------|
| 54.3 bits(129) | 6e-39                                                                                    | Compositional matrix adjust. | 26/44(59%) | 30/44(68%) | 0/44(0%) | +1    |
| Query 1        | MLKEFVVFASLIFFSYGCLITNCPRGGKRGDIVPSLGTVARECS 44<br>M K +V +L+ SYGCLITNCPRGGKRGD L +ARE S |                              |            |            |          |       |
| Sbjct 6694     | MSKVIIVLTTLVLSYGCCLITNCPRGGKRGDPTFLENIAREVS 6825                                         |                              |            |            |          |       |

**Steganacarus magnus**, whole genome shotgun sequence

Sequence ID: [gb|BFN01029022.1](#)|Length: 1266

Number of Matches: 1

Range 1: 516 to 923[GenBankGraphics](#)

Query: Ixodes scapularis gi|506953581|gb|AGM20426.1|

Alignment statistics for match #1

| Score          | Expect                                                                                                         | Method                       | Identities  | Positives   | Gaps        | Frame |
|----------------|----------------------------------------------------------------------------------------------------------------|------------------------------|-------------|-------------|-------------|-------|
| 68.6 bits(166) | 4e-13                                                                                                          | Compositional matrix adjust. | 49/137(36%) | 67/137(48%) | 26/137(18%) | -2    |
| Query 1        | MALSHMLLLAVVGG-TSACFITNCPPGGKRSSESPARL-----<br>+ LS + L+A++ G T+ACFITNCPPGGKRS+                                |                              | 38          |             |             |       |
| Sbjct 923      | LNLSILTLIALIFGLTTACFITNCPPGGKRSFAFIKNNQKQVI*KTINGFLIRNYNRCVI*                                                  |                              | 744         |             |             |       |
| Query 39       | -CPRCPAGRGVCYSADVCCAGSM-CILNDALATLSCRAEALHGVACHVPGKRCGT-DGR<br>C RCGP G G C+ AD+CC ++ C +L + C E + C + GK C +G |                              | 95          |             |             |       |
| Sbjct 743      | *CSRCPGPGVGRFCFGADICCGGATIGCHFKNRLTEV-CLTENYNPHPCIDGKSCDNGNGV                                                  |                              | 567         |             |             |       |
| Query 96       | CAIRGYCCGPDGCTKDS 112<br>CA+ CC P CT +S                                                                        |                              |             |             |             |       |
| Sbjct 566      | CALNSTCCTPGKCTLNS 516                                                                                          |                              |             |             |             |       |

**Hypochthonius rufulus** scaffold114652\_cov135, whole genome shotgun sequence

Sequence ID: [gb|LBF01028909.1](#)|Length: 27086

Number of Matches: 2

Range 1: 2097 to 2183[GenBankGraphics](#)

Query: Ixodes scapularis gi|506953581|gb|AGM20426.1|

Alignment statistics for match #1

| Score          | Expect                                                            | Method                   | Identities | Positives  | Gaps     | Frame |
|----------------|-------------------------------------------------------------------|--------------------------|------------|------------|----------|-------|
| 43.5 bits(101) | 7e-11                                                             | Composition-based stats. | 20/29(69%) | 25/29(86%) | 1/29(3%) | -1    |
| Query 3        | LSHMLLLAVVGG-TSACFITNCPPGGKRS 30<br>+S + +LAV+ G T+ACFITNCPPGGKRS |                          |            |            |          |       |
| Sbjct 2183     | MSILTILAVIFGITTA <del>CFITNCPPGGKRS</del> 2097                    |                          |            |            |          |       |

Range 2: 1763 to 1984[GenBankGraphics](#)

Alignment statistics for match #2

| Score         | Expect                                                                                                        | Method                       | Identities | Positives  | Gaps     | Frame |
|---------------|---------------------------------------------------------------------------------------------------------------|------------------------------|------------|------------|----------|-------|
| 42.4 bits(98) | 7e-11                                                                                                         | Compositional matrix adjust. | 26/75(35%) | 36/75(48%) | 3/75(4%) | -2    |
| Query 39      | CPRCPAGRGVCYSADVCCAGSM-CILNDALATLSCRAEALHGVACHVPGKRCGT-DGR<br>C RCGP+G G C+ D+CC + C + + T+ CR E + C G+ C G C |                              | 96         |            |          |       |
| Sbjct 1984    | CTRCPGSLGRFCFGDICCCEIEIGCHFKNQITTI-CRTENISPRLCRNEGRTCNNGKIGC                                                  |                              | 1808       |            |          |       |
| Query 97      | AIRGYCCGPDGCTKD 111<br>AI CC C +                                                                              |                              |            |            |          |       |
| Sbjct 1807    | AIDSVCCSTSKCHNN 1763                                                                                          |                              |            |            |          |       |

**Platynothrus peltifer**, whole genome shotgun sequence

Sequence ID: [gb|LBF001089471.1](#)|Length: 3080

Number of Matches: 2

Range 1: 990 to 1037[GenBankGraphics](#)

Query: Ixodes scapularis gi|506953581|gb|AGM20426.1|

Alignment statistics for match #1

| Score         | Expect                                  | Method                   | Identities | Positives   | Gaps     | Frame |
|---------------|-----------------------------------------|--------------------------|------------|-------------|----------|-------|
| 39.7 bits(91) | 3e-08                                   | Composition-based stats. | 15/16(94%) | 16/16(100%) | 0/16(0%) | -1    |
| Query 15      | TSACFITNCPPGGKRS 30<br>T+ACFITNCPPGGKRS |                          |            |             |          |       |
| Sbjct 1037    | TTA <del>CFITNCPPGGKRS</del> 990        |                          |            |             |          |       |

Range 2: 674 to 880[GenBankGraphics](#)

Alignment statistics for match #2

| Score         | Expect                                                        | Method                       | Identities | Positives  | Gaps     | Frame |
|---------------|---------------------------------------------------------------|------------------------------|------------|------------|----------|-------|
| 37.7 bits(86) | 3e-08                                                         | Compositional matrix adjust. | 25/69(36%) | 31/69(44%) | 1/69(1%) | -2    |
| Query 36      | ARLCPRCGPAGRGVCYSADVCCAGSMCILNDALATLS CRAEALHGVACHVPGKRCGT-DG |                              | 94         |            |          |       |
|               | A+ C RCGPAG G C+ D+CC ++ T C E C GK C G                       |                              |            |            |          |       |
| Sbjct 880     | AQKCIRCGPAGIGRCFDPDICCCEAIGCHFKNRFTAVCSTEDYSPHPQNDGKTCANGKG   |                              | 701        |            |          |       |
| Query 95      | RCAIRGYCC 103                                                 |                              |            |            |          |       |
|               | CA+ CC                                                        |                              |            |            |          |       |
| Sbjct 700     | VCALDSTCC 674                                                 |                              |            |            |          |       |

**Achipteria coleoptrata** scaffold1020\_cov175, whole genome shotgun sequence

Sequence ID: [gb|LBFM01000221.1](#)|Length: 64589

Number of Matches: 2

Range 1: 14022 to 14162[GenBankGraphics](#)

Query: Ixodes scapularis gi|506953581|gb|AGM20426.1|

Alignment statistics for match #1

| Score          | Expect                                                             | Method                       | Identities | Positives  | Gaps      | Frame |
|----------------|--------------------------------------------------------------------|------------------------------|------------|------------|-----------|-------|
| 44.3 bits(103) | 1e-04                                                              | Compositional matrix adjust. | 28/55(51%) | 34/55(61%) | 8/55(14%) | +3    |
| Query 1        | MALSHMLLAVVGGTSACFITNCPGGKRSSEPSPARLCPRCGPAGRGVCYSADV              |                              | 55         |            |           |       |
|                | M LS M L+ V+ TSACFITNCPGGKR S+PS R GP + + D+                       |                              |            |            |           |       |
| Sbjct 14022    | MILSIIMTLIVLV--TSA <b>CFITNCPGG</b> GKR--SDPS-----LRDGPKKQVILLFNDL |                              | 14162      |            |           |       |

Range 2: 14197 to 14394[GenBankGraphics](#)

Alignment statistics for match #2

| Score         | Expect                                                        | Method                       | Identities | Positives  | Gaps     | Frame |
|---------------|---------------------------------------------------------------|------------------------------|------------|------------|----------|-------|
| 41.6 bits(96) | 0.001                                                         | Compositional matrix adjust. | 28/67(42%) | 34/67(50%) | 3/67(4%) | +1    |
| Query 39      | CPRCGPAGRGVCYSADVCCAGSM-CILNDALATLS CRAEALHGVACHVPGKRCGT-DGRC |                              | 96         |            |          |       |
|               | C RCGP+G G C+ D+CC S+ C LN+ T C E CH GK C G C                 |                              |            |            |          |       |
| Sbjct 14197   | CTRCPGSPGIGHCFDPDICCCEAIGCHFKNRFTAVCSTEDYSPHPCHNEGLKANGKGC    |                              | 14373      |            |          |       |
| Query 97      | AIRGYCC 103                                                   |                              |            |            |          |       |
|               | A+ CC                                                         |                              |            |            |          |       |
| Sbjct 14374   | ALESTCC 14394                                                 |                              |            |            |          |       |

**Rhipicephalus microplus** strain Deutsch Ctg100269, whole genome shotgun sequence

Sequence ID: [gb|ADMZ02000298.1](#)|Length: 711

Number of Matches: 1

Range 1: 221 to 313[GenBankGraphics](#)

Query: Metaseiulus occidentalis gi|391348425|ref|XP\_003748448.1|

Alignment statistics for match #1

| Score         | Expect                                       | Method                       | Identities | Positives  | Gaps     | Frame |
|---------------|----------------------------------------------|------------------------------|------------|------------|----------|-------|
| 33.1 bits(74) | 2.3                                          | Compositional matrix adjust. | 15/31(48%) | 20/31(64%) | 0/31(0%) | +2    |
| Query 1       | MKLVALYFLSVSSLSWACFITNCPGGKRS+ 31            |                              |            |            |          |       |
|               | M + L + ++ ACFITNCP GKR+S                    |                              |            |            |          |       |
| Sbjct 221     | MTPLNFLMLGLVGMTSA <b>CFITNCPGG</b> GKRSS 313 |                              |            |            |          |       |

**Centruroides exilicauda** breed non domesticated species of scorpion Contig13139, whole genome shotgun sequence

Sequence ID: [gb|AXZI01013139.1](#)|Length: 1479

Number of Matches: 2

Range 1: 1049 to 1120[GenBankGraphics](#)

Query: Limulus polyphemus gi|926609726|ref|XP\_013784878.1|

Alignment statistics for match #1

| Score         | Expect                                | Method                       | Identities | Positives  | Gaps     | Frame |
|---------------|---------------------------------------|------------------------------|------------|------------|----------|-------|
| 36.6 bits(83) | 0.17                                  | Compositional matrix adjust. | 16/24(67%) | 17/24(70%) | 0/24(0%) | +2    |
| Query 14      | LAVTIKGCFITNCPGGKRSIGTF 37            |                              |            |            |          |       |
|               | L V CFITNCPGGKRS+ T                   |                              |            |            |          |       |
| Sbjct 1049    | LIVLTS <b>CFITNCPGG</b> GKRSLHTI 1120 |                              |            |            |          |       |

Range 2: 1323 to 1466[GenBankGraphics](#)

Alignment statistics for match #2

| Score         | Expect                                                   | Method                       | Identities | Positives  | Gaps     | Frame |
|---------------|----------------------------------------------------------|------------------------------|------------|------------|----------|-------|
| 31.6 bits(70) | 8.8                                                      | Compositional matrix adjust. | 19/51(37%) | 24/51(47%) | 3/51(5%) | +3    |
| Query 61      | ICCSDIFGCFIKTRESVICRYENLQVIPCNNKKGKICETVPHGYCAAPGICC 111 |                              |            |            |          |       |
|               | +CC GC I IC+ ++ C K G+IC HG C GICC                       |                              |            |            |          |       |
| Sbjct 1323    | LCCGSTVGCIINEEGIPICQ-QSFDYHHCCKNGRICRL--HGICTTNGICC 1466 |                              |            |            |          |       |

**Mesobuthus martensii** Contig352499, whole genome shotgun sequence

Sequence ID: [gb|AYEL01091269.1](#)|Length: 16655

Number of Matches: 1

Range 1: 9791 to 9898[GenBankGraphics](#)

Query: Limulus polyphemus gi|926609726|ref|XP\_013784878.1|

Alignment statistics for match #1

| Score         | Expect                                             | Method                       | Identities | Positives  | Gaps      | Frame |
|---------------|----------------------------------------------------|------------------------------|------------|------------|-----------|-------|
| 36.6 bits(83) | 0.19                                               | Compositional matrix adjust. | 18/36(50%) | 23/36(63%) | 5/36(13%) | +2    |
| Query 7       | IMILGFCLA-----VTIKGCFITNCPGGKRSIGTF 37             |                              |            |            |           |       |
|               | +M+ F L+ V CFITNCPGGKRS+ T                         |                              |            |            |           |       |
| Sbjct 9791    | LMVMHFPLSFATLIVLTNA <b>CFITNCPGG</b> GKRSLHTI 9898 |                              |            |            |           |       |

**Supplementary Data S2. Putative inotocin receptors.** Sequences of 120 novel and 33 previously annotated inotocin receptor sequences from arthropods. (A) 92 newly annotated putative inotocin receptor sequences. (B) 33 deposited inotocin receptor sequences derived from NCBI. (C) 28 non-annotated inotocin receptors are presented as BLAST search results. Conserved motifs (XPQX<sub>2</sub>WX<sub>5</sub>-<sub>6</sub>F at the end of transmembrane domain 2 and the beginning of extracellular loop 1, and CXNPW in transmembrane domain 7) are highlighted in yellow; see also Supplementary Figure S6. Sequences from (A) and (B) were used to prepare the alignment illustrated in Supplementary Figure S3.

**(A)**

```
>Catajapyx_aquilonaris
LRDNVSGLVEQDSRDETLAAVEIATLAIILLVAIILGNMFMVVGIIWRQLQFRPMSRMYYFMLHLSVADLLVAVFNILPQLLWDITYRFQGS DALCRTVKYFQ
VMVLYLSSYILMFMAVDYKALCCDAFSPWNSLLAAKIMVASAWVMAFGFATPQAVIFTLKKISPGVQDCWGT FVEPWGTKAYVTWVVISIFVMPLLVISS
SYGAI SYRIWYNS EPRCWTASKWKWLDLKKCLCCTRKESEGRQSPSSVEDNDVLEQAESSPLPQKATQLELAGRLKSKVGCNVKQKRKSMISDAKIKTLQL
TLAVVICFFVCWAFPCIAQLILVYNPPEDRDVDPVTVILLLLASLNSCTNPWIIYTLFSGSLLNQLRV
>Blattella_germanica
MENASQAVNGSTTAEDLDRDEVLARAEIATLSVMFVTVTVGNFAVLLVLSARPRKLLSRMYFIFILHLSIADLCTAFLSILPQLAWDVTYRFRGGPIMCKVV
KYQOTLGPYLSAYILMVTALDRYQAVCHPLAYCSWTSRRSKFMVWTAWVFALGFCVPO
>Parhyale_hawaiensis
MLDEPLPTMSEELVLNVSVNASEDAINFIDILSVQNNTSFGSRDEVLAAFEVLTLASIFVVTIVGNCIVIFKHFMRKKFRMNYFIFALSLS
LVTAMFNVLPLQLIWDVTFRFKGGNVLCKCVKFGQLVGPYLNAYILVVTADRYQVICRPLSNCRWRP GHSIRLIGAATFSLWLSVPLQFIFSLR SKNGIQ
DCWASFIQPGWVAVYVTFYSIAVFPVPLILLVFFSVCI IATLLRHNFQVPIQCNIYRQSYSTTSVHCLHHSPhKVYHHRGNSMNLSCPTVYRSKPIGSLPH
CSLHSRSLSEKAFGQKMKQNSLSMVKQVRSRIMSPISRAKIKTVKLTIVIFFVACSAFFISVQLWSVWDPNAKNSPFSSE-
>Frankliniella_occidentalis
APQVEVAVLGVLLVLTVLGNVALLALYARRRCGRRKLSRMFYFILHLSVADMVTAFFSVLPQLVWVTFRFHGGNFLCKAVKFGQPLGVYLSYVLTATA
CDRYRAICHPLTYCSWTSRRAKTMVWAAGVAICFSAPQVRSEGYTAGQRQTLEANSVPCVNCNLF I
>Ephemera_danica
IATLAIIFGVTVLGNLVAIAISFRRAKISRMYFYIMHLSVADLITAFFNVLPQLAWEITYRYCLSQLCRGVKFSQQLLGPYLSYVLTAVDRYEAI CRP
LTYCTWPARRAWFLVAGAWTLALLCCAPQLFVFSYRVPVQQPDVFDCAWTFEPGWERAYVSWYATSVFLVPLMVLVAVYFRICQALWRNYNLKQRAQQNG
LLQPNFHFYPRIMEPRTHSLRGISRAKLRSIKLTIVVIACYVICSTPFI GAQLWATWDEAMQSPFWSGPTFTTIVTLLASLNSCVNPWIIYLA FNPELARL
LITRGRV
>Ladona_fulva
MATLAAMLVIVSIVGNAMVALWARPRSSPRRRLSRMHLVLHLCTADLITAAFTVLPQMAWEVYRFAQAAPLCKPLKVLQQLLGPYLSYLLVAMAIDR
HRAVCRPLSVRAF LPRSPRRLVAIAWALSALFSLPQAFVFSYQKATETEWCAWTFDPPWTKAYVTWYGISVFAVPLVLLLYAYAGICRALRRNHREKLRP
QEDGLIPRGAPPRTHSMGTISRAKMTRLRLTIVAVACYILCSCPFLVSLWATWYPGATESSFWRGAFTILSLLPCLNSCVNPWIIYMAFNEEIRVALRER
LPGRVRDAVRSLFRFNTSKRLRHNDAITYASSSSRTRSSRESPQMEIKTLNSPVKDPSPVKKNGVVAEPKTEK
>Platynothis_peltifer3
MTGNGSLTVKRDEKWLLEIGILSLIFILIVFGNSCVLIALQVRKLMNRMYYFLLHLCIADLITAFFNVIPQLAWEITHRFYGGNFKCTIKYLQILGPY
LSSYVLMVTAIDRYQAICYPLSNCAWTPSRSKLMILMAWIVSLLCCAPQIIIFSYQEIGSQIFDCWGTFSQPYGERIYVTVYAVSVFIPFIIILTFTHVHI
CREIWLNLHKKRKSFKINRNKSSSSCNRNDKLD CDSVNSPETSEHRSGTRLLVTVGKSYRFGKQVEVSVKEDCKGKEDYNSPRTHSIHGLTRAKIKTVK
ITIVIIMCYIFCSTPFIICVQLWAYWPNQAQSP IWNV KYTYLSNNA
>Platynothis_peltifer2
MEVSTAI SEETDGI PFETSSIKPNI TGRNENLALIEVGLTGI FVLIVFGNCCVLLALALRRLKMTMYFLLHLCISDLMTGFFTVLPQLAWDITYRFNG
GNILCKAVKSMQILGPYLSYVLVVTAIDRYQAICFPLSNCSWTPRRAKLMISCAWIIISIVCSLPQAFIFSYQVEPETNHIYDCWGTFFQPWGERIYVTWY
AISVFFIPLVILTFTHIYICREIWNVNLKRQTGRRETQINQINIDNSNSYSRTRKCLLIALNRVYRLGRQRDTEAEIQINCDNQEVRPLHTVVTQFQESV
SSSPRVNTFNRLSRAKIKTVKITVVVILCYVICSSPFIICVQLWAYWPNASTTTFWNGMFLSFI I
>Platynothis_peltifer1
MEEIGTTVLEELDKLPETIIANVTKDSRDEHLAVFEIATLGLIFLLIVFGNSCVLIALIMRKLKMNRMYYFLLHLCIADLITAFFNVLPQLAWDITYRF
YGNILCKTIKYLQILGPYLSYVLMVTSIDRYQAICYPLSNCAWTPKRSQMLISFAWIIALLCCIPQVIFSYQQIPGYDIIDCWGTFFQPWGERIYVSW
YAI SFFFVFPFILLTFTHVICREIWRNVHQKRSVKMEQNKIIQNDDSDRVSSCSSTNDSIARSTNLLVTVGRSYRFGKGRGRVEVSDGPKSRGTYNPRSH
SLNGLSRAKIKTVKITVVVILCYIICSSPFIICVQLWAYWPNQNSTFWGSKCSENSFI IQFRYSFQ
>Platynothis_peltifer4
MSNVIMSINNTTSVLYNISGSDKRDENLAIMEVSI LALIFILIIIGNL CVLIALAVKRFKMTMYFLLHLCISDIITGCFTVMPQLAWDITHRFNGGNIL
CKLVKCLQFGPYLSYVLVVTAIDRYQAICFPLTNCHWTSRKS KLMITIAWIIISILCSAPQAFIFSYQEI PRNTRNGVRDCWGTFFQPWGERIYVTVYAITV
FFIPLIIITTYTYVICREIWANVRKRQTLKPEISLIEVRKNWGKLSKSSDDKSRQLQSDRCLANNLLNPRSHSIYRISKAKIKTVKVTVVVICYIVCSSP
FICVQVWAYWYPSAQETSFWTGKH
>Platynothis_peltifer5
METVSDLITFSREQEFDFELLNDSNVNKSSFEIRDSRNE SLAIEISLTFMFISILIGNIFVLTALIVRDSKMNRMYYFLFHLHCIADLITAFFNVLPQL
IWDITYRFYGGNVLCKLIKYLQILGPYLSYVILVITADRYKAI CFPLSNCSWTPKRSQMLISIAWVLSLIFCAPQLFIFSYQQIPGTLGNVYDCWGFPPQ
PYGERIYVTVYAITV FVIPCIIILFAHVCI CREICNNLHRKRESIEEIKNCIHYSFKRNKEFSTSSLKSTSLTSFSGPIKSPITYSIRPSKRLRR IHSQID
LKKDLRNSLTNLSVKVNDLNSTPRSHSLRFVSRAKIKTVKITIVIMLCYVICSMPIFISVQLWVYWFPSAQSFQTSSELSNIY-
>Achipteria_coleoptrata2
MSSDSSMSVENISQTIIFQIINDNMTANTSLAVKRNEKLVLEIGILLIFLLIVFGNSCVLIALQINKLMNRMYYFLQHLISIDMITAFFNVLPQLA
WEITHRFYGGNILCKTIKYLQIFGPYLSYVLMVTAIDRYQAICNPLSNCKWTPGRSKLMTIAWIVTSFCCSPQIFIFSYQQIPGTDAIYDCWGTFFQKPW
GERIYVTVYAVSVFIPFIIIVVTHYHICREIWLNLHKKRKSFKLNKNRVGKSYRFSKRGKLEVSVDKDFKEDFSRTHSIHGLSRAKIKTVKITVVIIIC
YIMCSTPFIICVQLWAYWVPTAQKSHIWNV KYTYNIYLMFFSIIIDVTIAFKILYSE
>Achipteria_coleoptrata1
ENITEELKNNTTSDTRDEHLAIFEIATLSLFLVILFGNSCVLIALLMRKIKMNRMYYFLLHLIIADYLVAVFNVLPLQLIWDITYRFYGGNLLCKVIKYL
QILGPYLSYVLMVTSIDRYQAICYPLTNCQWTPTRSQLMITLAWIIALLCCIPQVIFSYQQIPGTDIYDCWGTFFLPQYGERIYVTVYAI SFFFIPFII
LTATHVICREIWI
```

>Varroa\_destructor1  
MAGNIVLVLVLQSKPKSAHLSRIYFFLLHLSIADILVGFNISPQLVWDIYFRFPLGNFACKIVKFLQVFLVYLSTYVLAGMAVDRYLAIRSGINRPVIV  
VRTLLSVSWLVAASVLPQYIFSFQKLNPAHDCWATFEPPIITSFYRVLFFITAVLFIPTLMLALCYTYSWIISKRSLSHTKLNPIRMTMVMVIVFVLC  
WTPFCCAQLYLESTGQVPSIFITLFLVLPNLNSCANPWVCLTFSTTLRRLKTDALSFFGFCEHLSVYRSKNAITISILQYRPPNRSKRQPRAYRGA  
>Varroa\_destructor2  
EARRSSLSRVQLFMMHLSIADILVALLNLPQLAWDITARFYGGALLCKFVKYAQVLVLYLSTYILTGMSLDRLVSM  
>Ornithodoros\_turicata  
SYVLVVTAVDRYQAI CFP LSNCSWPTPKSKLMI AF AWAVSLLCCVPQLFISYQQVENGVDWGTYAEPWGVTA YVTWYGVSVFVPLAVLTFTTYIYICR  
AIWHNLYLKRSSEGRSDKELSSRRTYRFAGRQRKMSSANGS FVAPRSHSVRGLSRAKIKTVKIVVVI VYVVCSSPFCVQMMWYWSPDAESSELWSSS  
TVTILMLLNSLNSCVNPIYLA FNKNLLNALRTACCLAKVSGRGC SYLARDTTDGTNDSNAHSVSHCEGDHARIKCSPSKRRNGFRSSTDVEMRTAQDCG  
ADT  
>Panonychus\_ulmi  
RDENLAIIEIITLSAIFVMIVFGNTSVLLALILSRIKLRRMYFFLLHLSIADLITAFNTVLPQLIWEITEHFYGGQILCKGIKYLQLLGPYLSSTFLCATA  
IDRYRAICYPLESRRLNRSNLKVSIAWGLALICCLPQLLIFSYHQIPNPNQVYECWGTFIQPYGERLYVTWYAFSSFFIIFTIIIFTFSNICSELWKN  
>Hyaella\_azteca  
SDLVTA AFNVFPQLMWDITFRFRGGDFLCRSVKFGQLVGPYMNSYILVVT AIDRYQVICQPLSNCRWTPGHSIRLISCATAISLFLSIPQLFNFSFREKNG  
IYDCWADFI PGWGTAYVWYAI AVFFIPLVLLIFFSGCICCALLRYNFQVNPQSSYVSRSHSQAGQESPNNETTSRKYGRITLDDTTGSSSTVNDVNYGN  
AVRILSYSSATNKARNTVIEHGCRYRFQKTPGAKTVMSPISRAKIKTIKLTMIVIFFFIVCSAPFITSLMWSVWDP  
>Lepeophtheirus\_salmonis  
VSNTSLNTPSSSPNSLHHTKLWVLGIIIVLTILGNSIVILAIATRFIKMTRMYFFILHLSIADVLTAFLTLLPELIWYTSNPNFYGGAFCKAVKFGQ  
MIGPYLSSYVLIIMTAIDRYHAICFPFSKCTWTPKRSNIMIGLAWLVSALCVPQIIIFGSGEKSHSCSATFAQDWGQKAYVTWFAVSNFFLPLIILYCYG  
CICKIWDNFNSKIPLNPGVEVRSITCCKNKGRAEETIRYRWKSTKRALGSTAEYSKRNDTIEEVMMNLTLSVSNNDQNDPNQIQAASSFTFDRCGKLR  
KSKNKVLIDLSDPTQTKNKKSLKPRTHSIQGISRAKIKTIKLTVVVIAGYIACSAPFICVQLWVTFGTVTSIRK-  
>Triops\_cancriformis  
SARDEKLAIAEIA TLAVIFLLALSNNVFMVAIWRQRQYRPLSRMYFFMLHLSLADVLVAVFNILPQLLWDITYRFLGGDLLCRFVKYQGIMPLYLSTYLL  
MFMALDRYRAVCSASNHLWNSLKVAKMMVTSAWVLSLLAIPQAIIFSEQYINPDGTTTETDCWVRFIEPWGAKAYVTWVISIFALPLLIIGISYGAIS  
LRLWRYSQEAHRSEEMTRGHKRTIGLPAGAAGALRPTSRWRRASRLGRFFLQRERATHQRNSCGDLEEDFPATTHVILVESQSSSSGSKPVAESLPL  
RESDTASSTKSSSHGKIKMPEPFLRRNSHRITRAKIKTIQLTLVVISFVVCWAPFCITQLVLVYDPPSN  
>Caligus\_rogercresseyi  
EGNSLHQTKLWVLGIIIVLTILGNSIVILAIATRHIKMTMYFFILHLSIADVLTAFLTLLPELIWYTSNPNFYGGALCKIVKFCQMIGPYLSSYVLIIMT  
AIDRYHAICNPLSKCTWTPKRSNIMIGLAWLVSFALCIPQAIIFGSSEAKYSCSASFVVDWGQKAYVTWFAVSNFFLPLIILYCYGRICKTIWDNFNSKV  
PMSDAGGVTCCGNRGRAEEMIRYRWKSSKRSRNNQNEVHQNTENEMMDNFSLVSNQGTDRDNPQIKNATSFTFDTFHVQKGNKRVIIDLSSPVQKQK  
RKS LKPRSHSIQGISRAKIKTIKLTVVVIAGYIACSAPFICVQL  
>Pachypsylla\_venusta  
MDESNGTLVNYNDTSDERDEDLARVEILTLIIIVLITIVGNIMVLFALYSRRHFQKQIKMPRMYFFILHLSIADLITAFNVLPQLLWWDINRYRFPSSNW  
LCKLVKFVQPSGFLSSYILMAIAIDRYRAICQPLTYHSWNSRRSRIMILLI AWAFAFTFCIPQVQISIFSYQEIKPGVYDCWASWDQEWGERIYITWFSVS  
VFIIPLICLIYTYTCICLALKNTAYPAPSPHKIISRAKINTVKQTITVITLYIICSLPFIQAQLWETWNLNQTVYPVQDSALTIIMLLSSLNSCVNPIY  
LVSNRELITALWTLCFNINVKENRTVDTASGNSSSARECCRRTDSNVTMGTYLNRQSCNDDTYVSEDNLIVSRPQWVVSVPDG  
>Homalodisca\_vitripennis  
MANDLVFNSSLASDLRDEELARAEIAVLAVIFVVTVTGNTAVLVALYARRFCTGNKKLPRMYFFILHLCVADLTGLLNVFPQLCWKITRYFKGGMPLCK  
VVKYQGTMGPYLSSYILVATALDRYKAICEPLNYSNWTSSRSALTVSAAWSLTLFCIPQVQVIFSYQEIAPGVYDCWATFPFPWGERVYVTWYSVSVF  
LVPLFVLITYTYFCICWTLWRYSLGPDSSPHHLISRAKINTIKQTVAVILLYISCSSPFIQAQLWASWGPQPFFDGAFTILSLLSSLNSCVNPIYLSF  
NRELLRSLWRASICTGSPRHRNLRGSASSCR  
>Acerentomon\_sp  
MANQSLNVGDPWINETQVAEHLVNVGDPWTNETQEAEDGFKYERNEDLARIEIAILAAIFCATVIGNVLVVALFNTKKMTRMYFFMMHLSIADLFTAFF  
NVLTLQIWEITEYRAGGNYLCKFKYMQIFGPYLSYIITVLTALDRYRAICFPQNSRWTERRYKAMIAVAWATLCLCSPQVFIYSYKMGVTNQSGDIYD  
CWATFIEPWGAKTYVTWYAFITFIIPLLVLIYTYFNICRTIWRSKNWI STKVSPVKRCVKVSQLYEDGGAKKHRGNGFYRERRSLWKRMSMSNSQSMTN  
SNVSAETIKLTLDEIDELSTVNSEIILDMAMRSTIVPVTPEPQVPTQQSISFFQSVSSTSSALPVRTTNTSSTSESTSVH  
>Polistes\_metricus  
MNETTNSFTAANEEEDIRDENLAKWEIVLLANILIFTIPGNSLVLLSLYLRRAHKKLSRMYFFIMNLSIADLLTGLLDVLPQLAWDITFRFQGLVLC  
LKVKFFQPPGLYLSYIITATAIDRYHAICHPLSYCSVTSRKRIMVYCAWSFALILCIPQLFVFSYQEVMPRIWDCWATFDIKFGEKAYVTWYSMLVFL  
PFIVLVYTYVVICVGVWQSNKMSGAVDDRTYIRISINSYRNRSSIFSKAMINTVKQTI AVITLYAITSPIIGCELWISWDPEAPKSSFANGPAFTILALL  
NSLTSCVNPIYLSFNRELRLQTLMNFCNHNEHSQKYYGQRMRRSDSNDTSTRTSLMSRISRYTSSIIPR-  
>Wasmannia\_auropunctata  
MSHDLNSSSSPPLSSDRPQDDARDEDLARWEIAVLTSIFLVTLIGNALILLALYVRRYQRKFRTRMYFFILHLSVADLLTGLLDVLPQLAWDITFRFQ  
GAVLCKLIKFGQPPGLYLSYIITVTAIDRYQAICHPFYSYCVTSRRSKMMVYGAWTLAAALCVPQIVIFSYTEISPGVWECWATFYLYKGERAYITWYSV  
TQFLLPFVVLVYTYTRICLSIWRSSKMSGVVELKRDNKASFQQRNRDPLISKAMINTVKQMIIVTLYIVTNIPIGCELWATWDPKASTSPFFSGAAFTI  
LSLLNSLTSCVNPIYFANFKELRAALINFFCRKDYSLTYDIDVRQNASDVPSTSSFISRI  
SRLASSKIFG-  
>Aethina\_tumida  
MYGLKMNVTSTGETIEELERAAKERDESLAKIEVAVLAVIFIVTVIGNSTVILALWARRRCAGRKKLSRMYFFILHLSIADLITAFSLVLAQLAWDITYRF  
RGYIILCKLVKFGQTLGPYLSYVLMATAIDRHQAICYPLTYCSWTSRRSKFMVYIAWITSLVFCIPQLTIFSYQEIVDDGEFDCWATFQEPWQKAYVIWY  
CVSVFIVPLIVLVYTYTCICKDIWHSSEISMRRNSLVGKRTKMP LISRAKINTVKQTI AVIFMYIICSSPFMFVQLWATVDPNPFQGPIFTIITLTL  
SLNSCVNPIYLA FNRELRLQTLMNFCNHNEHSQKYYGQRMRRSDSNDTSTRTSLMSRISRYTSSIIPR-  
>Pogonus\_chalceus  
MYFFILHLSIADLITAFNLTPQLGWDITYRFNGGFLCKIVKYCQTLGPYLSYILMATAIDRHQAICYPLTYCSWTSRRSKVMVWLAWATSLAFICPQV  
TIFAYQEVAPGINDCWATFPQPWGARAYVTWYSISVFIIVPLIVLIFTYGAICRVIWQSAGGELGLRSPRLAPDPPRCARSRRAPLISRAKINTVKQTVAV  
IAMYIACSTPFIQAQLWATWDPANESAFNGAAFTILTLSSLNSCVNPIYLA FNRELRLLLRHAYAATSKNYRSAGTGNASNSGGVESTSLRPFSSK  
WSLCASAKSSSAINHNGNNTNGHAIGSGDFRFRYPAPPASSAASTLIRLPHAPAHSPQQLMQPSPFLGRYHARRWIVTSTA-  
>Medauroidea\_extradentata  
MGDGRNCSLATSEDCQLPNMLVANHSVKNSTNDGYDRDEDLAHAEIATLAVMFIITMVGNSCIIYALCARMRHKLTMYFFILHLSIADLITGLLNV  
LPQLAWDITYRFQGGPVLCKIVKYFQPLGPYLSYVLLATALDRYQAICQPMTYCSTDSRRSRAMWLAWCVSLVFCIPQVIFSYQETAPGVFDCWATFP  
EAWGKTYVTWYSVSVFIIPCLVLYTYSRICHEIWEKSGFRAAHAARSSPLKINPTISRAKINTVKQTVAVIVLYISCSSPFIQAQLWATWDPHASESAF  
LTGAAFTILALLSSLNSCVNPIYLA FNTELVRLLKKGDPRTNADLFGSGSSTSWRNSKVYRLVNGSAFKQRDAVRERRWAMAMPTKPIIATALMAGR  
DAPSTSQDVA-



ILALLYSLNSVCNVPWIYLTFTNRELPRLLVKHCTASSKNYKSANAGNSGNSSSGEPQSTSLRPFKWSFCNSPKSNGNKYTSRLTQRPHYDAQSNTRRWIVTT  
TT-  
>Inocellia\_crassicornis  
MNGTELIKSAPEPNGNERDEVLAQAEIITS AVIFVVTVIGNGTVLLALFARQKYSGCRKLSRMYFFILHLSIADLVTAFFNVLPQLSWDITFRFKGGPLLC  
KAVKYNQLLGPYLSAYILSATAIDRHQAI CYPLTYCSWTSRCSRAMIWMAWAASLAFICPQLIIFSYQIEPNVWDCWGTFFPEPWGAQAYVTWYLSLFI  
PLCVLVFTYTCICREIWR TARHGILRPATTPMVSVTAPTHGPVRRRTQPFVSRKINTVKQTAVIVTYIVCSMPFISAQLWVTWYPHAMESPFFSGST  
FTILTLLSSLNSVCNVPWIFLLFNKDLFRLLKRLFVNLDSSKTKYTRGGMSKASNSSTVETAVGRLSWLSKSFRRSSKASFQHVHNNIIQS-  
>Cercopis\_vulnerata  
EELARAEIAVLA AIFVITVTGNTVVLVALYGRFFCGGRKLSRMYFFILHL CIADLV TALLNVFPQLIWDITFRFKGGPFLCKLVKYGQTLGPYLSYVLM  
STAMDRYKAI CHPLTYCSWTSRRSRTMVRVAVIVSLILCIPQVNI FSYQEIAPGIYDCWATFPEPWGEKLYVTWYSVSVFLIPLCVLIYTYTCICRELWRN  
AGFPESTSSPHRLISRAKINTIKQTVAVIALYISCSPPFICAQLWASWDPNALSSPFLQATFTILTLLS  
>Aposthonia\_japonica  
MNSAEKSDGRDEDLARVEVTVLAIIFAITLVGNLLVLLVLRKRLSRMYFFIVHLSIADLITAFFNVLPQLGWDVTYRFIGGPI LCKI IKFCQTLG  
PYLSYVLLATAVDRYRAICSPLYVHSWFRRAKIMVLIAWIISLWFCVPAQVVFYSYQIELEPGVWDCWATFIKPGGERAYVTWYSVFSFIIPLSVLTYS  
CICRKIWRNTGAGFHI IQTSPVISRAKINTVKQMVIVILFYI ICSTPFTFSLWATWDTAVELPFKGAFTILTLLSSLNSVCNVPWIYLT FNKELIALL  
VNCGASDLHYRGSSSSKERSLSKLVSWRST-  
>Tenthredo\_koehlerii  
MSNSTAENRSFVESECNLTISSEIDDSRDEYLAWEVATLALIFVVAIAGNSLVLTAFYFRYDAPRKKLPRIYFFILHLSIADLITAFFNVLPQLGWDVTYRFIGGPI LCKI IKFCQTLG  
FRFQGGPVLCKFVKFGQTLGPYLSYVLAATALDRYQAVRHPLIYCSITSRRSKMTVYFAWCLSLLLCVPQTLVFSYKEVSSGVWDCWATFDLTPYQOQTY  
VTWYSISVFLPLIILVYTYTICIVIWNNGI VGEARSTHGGLLRQRTVISRKINSIKQMIAVISLYAASSPFIASLLWVTWRNASASPFFYSGAAFT  
ILTLLSSLNSVCNVPWIYLTNRLDLSRALINRLYPTRGSSIKSQENPRQSI EIRWGSSASSSGTSIRSYASRMSRYANSVLRSSDSSSNKELQPSNRIR-  
>Gyrinus\_marinus  
MNTTANADQTFDRDENLAQFEIATLAVIFVVTVIGNGTVLLALWTRRRACAGRKKLSRMYFFILHLSIADLVTAFLNVLPQLAWEVTYRFRGGAVLCKLVK  
GQTLGPYLSYVLMATAIDRHQAI CYPLTYCSWTSRRSKVMVYTAWAALAFICPQLNIFSYQIEIAPGVYDCWATFPQAWGQKAYVTWYGISVFLVPLTY  
LTTTYGCI CREIWOQSAAGDLGGP  
>Chrysis\_viridula  
MSVEQNLNVTETEEDVRDEYLAKWEIIVLATILYMTLVGNLSLLFALYLRHRGRRRKFTRMHFFILHLSIADLITGLFNVLPQLAWDITFRFQGGNILLK  
LVKFMQPLGPYLSYVLMATAIDRYHAICHPLSYCGSSLRKSKIMVYSAWAVTLLCIPQVIVFSYQEVTPKVWDCWAVFNVA YGERIYVTWYSTMVFLLP  
FTVLLYTYTGICIGIWRSNKMSGVEDWRKVRNNGNFLERNRSPFISKAMINTMRQTI VVISLYAITSIPFICGQLWATWDPASSSSSFINGPAFTILTLL  
SLLTSCVNPWIYLSFNRELRAVLKDNLCRSDYSTTYDQELHPANSTETSTRSSFISRIFWYAGSMIFR-  
>Baetis\_sp  
MDSVDNSTTTTVDVAVPTRDEQLARVEIATLAFI FAVTVIGNSLILSAILFRRRVKITRMFYFIHLSIADLVTAFFNVLPQLAWELTYRFGGNLLCKGV  
KFGQILGPYLSIIILVLT AIDRYAICQPLAHCTWPVRRARALCVAWALALACCTPQVIFSYQPIGDTYDCWGTFFPEGWGERAYVTWYSGSVFLIPLLI  
LIFTYTCIQAIWRNYNAKKE SVAGLPPTDSKVLGNRVMHPRVHSMRGISRAKMKTIKLTVVVIACVYVVCSTPFI CAQLWATWDPDAMQSPFFWSGQPTT  
HLHSMFLLHHAR  
>Haploembia\_palaui  
MVHRKRQNDVMNSVASDGRDEDLARVEVTVLAIIFAITLVGNLLVLLALVLRKRLSRMYFFIVHLSIADLITAFFNVLPQLGWDVTYRFIGGPI LCKV  
IKFCQTLGPYLSYVLLATAVDRYRAICSPLYVHSWFRGRAKVMVFIAWTISLLFCVPSIIFSYQELKPGVWDCWATFIQPWGERTYITWYSVFAFIPL  
SVLTYTYTICICRKIWRNTGAGFHI IKSSPVISRAKINTVKQMVIVIFFYI ICSTPFTC  
>Cordulegaster\_boltonii  
MATLAAMLVSVVGN GAVLIALWARPRSPRRRLSRMHLLVHLCTADLITAAFTVLPQMAWEATYRFAPAEAPLCKPLKVLQLLGPYLSYLLVAMAI DR  
HRAVCRPLSVRAF LPRSPRRLVAIAWALSFLFSLPQAFIFS YRKATETEWDCWATFDPPWTQKAYVTWYGISVFAVPLVLLLYAYAGICRALRRNHREKMR  
PQQDGIIPRGAPLRTHSMGTISRKMTLRLTIVAVACYILCSCPFLVLSQLWATWYPGATESPFWRGAAFTILSLLPCLNSVCNVPWIYMAFNEDIRIALKE  
RLPGRVRLDLRPIFHPDITNKRRHHDATASASLSRTRSRRESPQPEVKATAESSKDEERDGC RMIGLADR TKEEKAVKESAVLLSNAPV-  
>Isonychia\_bicolor  
VGNTCVLI AIRHRRSKITRMFYFIHLSIADLVTAFFNVIPQLAWEITYRFGGDELCKI IKFLQLLGPYLSFIVLVTAVDRFHAICLPLSYCTWPAKKA  
KLLVSGAWVALLCCLPQVLI FSYQPI TPGGDVDFDCWATFPYWGGERAYVSVVTVSFLAPLLILFFTYTCICRAIWHNYNAKIASDGGFTTKQNTIQPRV  
HSIRGISRAKIKTVKLTVVVIACVYVVCSTPFI CAQLWATWDPAMMHS  
>Aretaon\_asperimus  
MDVSRNCSAAPEEGDQHS LQILDEIVGNCSSSANITNSTGGYDRDENLAEIATLAVMFIITVIGNSCILYALCLRKRKLLTRMYFFILHLSIADLI  
SGLLEVLPLQAWDITFRFQGGPVLCKFVKYFQPLGPYLSYVLLATAALDRYQAI CQPMTYCSSDSRRSRVMVMAWCISLVFCIPQVIFSYQETEPGVHD  
CWATFVEKWGERTYVTWYSISVFLIPLCVLVYTYSCICREIWEKSGFRAAHAARSSPLKMNPTISRKINTVKQTAVIVLYISCSLPPFIQAQLWATWDPH  
AAQSAFFTGAFTILALLSSLNSVCNVPWIYLA FNTELVLHLLTNRASAGAHADLVSGSGSSSTSWRNSRTRYRLVSGSMFKSRDSVRERRWAMAMPTKIP  
IATALMAGRDLPTSEEVAS-  
>Epiophlebia\_superstes  
GGRDEELAKAEIATLAAMLAVSVIGNAVLVALVWRPRSPRRRLSRMHLLVLYLCTADLITAAFTVLPQMAWEATYRFAPQAAPLCKPLKVLQLLGPYLS  
SYLLVAMALDRHRAVCRPLSARVFLPRSPRRLVAIAWALSFLFSLPQAFVFSYRRATETEWDCWATFEPWPWTQKAYVTWYGISVFAVPLVLLLYAYAGICS  
VLRRNHREKTRPHDERFLSRGAPRTHSVGTISKAKMKT LRLTIVAVACYILCSCPFLVLSQLWVTWYPGATESSFWKGAFTILSLMSCLNSVCNVPWIYMA  
FNEDIRVALKERLSARVRYLLRPSFRPDITKRVRHQEASMSASSSRGSSQPKIRANSEEGRNGGR-  
>Eurylophella\_sp  
FVVTIGNSCVLLVALSLRRAKISRMYFFILHLSIADLVTAFFNVIPQLAWEVTYRFRGGDILCKAVKFGQLLGPYLSYVLLVLTAVDRYFAICRPLSYCTW  
PARRARLLVSFTWVLLALFCLPQLAVFSYQRVQNPADKQDYDCWATFPQAWGERAYVTWYAGSVFLVPLAILVYAYLCIFAIWRNYNNKQFSAQGIH  
QHIVRNMNPRVHSIRGISRAKMTVKTLLVVIACVYVVCSTPFI CAQLWATWDPAMMHS  
>Pogonognathellus\_sp  
MATNSNTTNEISEFPENKSA AAVPDSGRNESLANIEIAVLSVILFFAVVGNGLMLLALRRLQFRPMSRMYFFMLNLSVADLMVAFGNILPQLAWDITYRF  
KGNLDCRVVFKLQIFVLVLYSTYVLTSMADVRYLVVCHHSFTRNHYGGLRGPKILVILSWILSFIFASPQAFIFSPKELTMDQTKVYDCWSTFIEPWGVR  
AYVTWFVCAFILPLVIGASYGAI CCKVISFNLPNES  
>Meinertellus\_cundinamarcensis  
LAIVEVTVLAVVLFVALAGNTMALFSLRLLRRLRPLSRMYFFMQQLSIADLMVAVFNVLPQLIWDITYRFGGDLVLCRLVFFQVMPLYGTYVLMFLAVD  
RYRAVCSAGPSPQAAKKEARLMVCAAWILSII LAIPQALVFTHREIAPGIQDCWADFPGGQGAKIYVLFVIAVFMAPLTVIAACYGIIISLKVWQFSSPQ  
STTAEPLAII CCARCRSSKSSSDRDTVLLRPIQSRNTSQRSSARLSRARMRTLRLTAVVACFIICWAPFCVSLVYNFNPTDQKQMSGVTVIFL LLA  
SLNSCTNPWLYLAFSGSLNLHLRVCLGLGIGRAQDGDSDIGDEPEKTPPPPIQKQTNQDGGGGGGTKSDLV-  
>Chrysopa\_pallens  
ILT LAIIFVVTLLGN GAVLALYNRQKCTGRKLSRIYFFILHLSIADLVTAFLNVLPQLAWEITYRFGGDPVLCKAVKFGQPLGTYLSSYILSATAIDRH  
QAI CYPLTYCSWTSQRSQVMVWTAWII SLIFCIPQLFIFSYQEVSPGIWDCWGTFFPEKWEKTYVTWYSISVFIIPLSILVFTYTRICCEIWRNANIGMPL  
RAMSSPCTPKRRAPLISRKINTVKQTVAVIILYIASSPFI SAQLWATWDPYAYKSPFWTGAFTILTLLSSLNSVCNVPWIYLSFNKELRKLKHIICS  
KTYKNKNYSTAITNSGSSSQGVESTTVRVPLRISFYTRNDGGANGKQYTTNYHPSVRYTPKKWTVAI EELPP-

>Corydalus\_cornutus  
VTAFNVLPQLIWEVTYFRGGEILCKAVKFAQVGPYLSYVLTATAIDRHQAICHPLTYCSWTSRRSKGMVYLAWLCSLIFCIPQVVFISYQIVPDAPG  
VYDCWATFSETWGEKAYVTWY  
>Aleochara\_curtula  
RYAGRKKLSRMYYFIFLHLSIADLITAFSLDPLQLGWEVTYRFGGALCKMVKFQQTLPYLSYILMATAIDRHQAICY  
>Cotesia\_vestalis  
DNSTSLDRDENLAFWEIIVLVINLIITLIGNCFIFFALYLRRYHGRQRKLRMYFFMMHLSIADFITGIFNILPQLSWDITFRFQGGPAMCKIVKFLQPF  
GNLSSYVLTATAIDRYQAICNPFYSYCR  
>Galloisiana\_yuasai  
ADLITALFNVLPQLGWEITRFRSFGPVLCKAVKFGQTLGPLYSSYVLLATALDRFQAICHPLTYCSWTSRRSRTMVWLAWAFS  
>Liposcelis\_bostrychophila  
MNTKAREFGNKGKRTSTRSQKHLSHNEKMEEARQSSIPDINLTADPTMELVRKNDSTDDFRGNEDLAQIEIGTLGVILIVTILGNGLVLLALYAKKCKA  
GKKTLSRMYYFIFHLCAVDLITAFNLVLPQLFWDITRFRKGNQFLCKSVKYG  
>Zootermopsis\_nevadensis  
EVSEACNLTTANSTSGLDRDEALQAEIATLATMLTVTVLGNFAVLLALSARPRKLSRMYYFIFLHLSVADLCTAFSLVLPQLAWDVTYRFGGPLLCKIV  
KYGQTLGPLYLSAYILMATALDRYQAVCHPLAYCSWTSRRSRAMVMAWVAFALIFCIPQVS  
>Conwentzia\_psociformis  
IPYKMNDFNATDQNYGFYFLNSTASDAVIEAGTDLAAASDNGDERNEELAKIEILILIVIFNVTLIGNLVLLALSARKRYSGHRKLRMFFFIHLHSLA  
DLISAFNLVLPQMIWK  
>Stenobothrus\_lineatus  
QLSVVDLLNGLLNVLPQLAWEVTRFRWGGAVLCKLVKFGQPLGPLYSSSVLVVLTALDRHQAVCRPLTYCSWTYRRSRAMQVAV  
>Leptopilina\_clavipes  
VDLLTAVLNVLPMQAWKITFRFQGGPFLCKLIKFGQPIGPLYSSYILTATAIDRYHAICFPFSYCRTRRSRIMVYSAWIIALILCTPQVVFVSYQLIS  
PGIWDCAWTFVTPYQGEAYVTWYSISVFLPFTVLVYTYTGICIGVWKNKSGVSDPLEIGYKKNINIKKAKSINNKGKSKYDETNNCCC-  
>Folsomia\_candida  
PLHEDNFSLTPNLSLVNTTLTPASPRDEFLEAKIEQSVLAIIFILITVGNFLVLMGIYFRKQKMRMYFIAHLAIADLTTAFFQVLTQLAWEVTYRFGG  
>Occasjapyx\_japonicus  
LESFRMNASSNASATGGMNGYERNEDLAKVEIAILSTIFVLTIVIGNSMVLAIFLKRKMSRMYYFIFLHLSIADLITGFFNVLTQLCWEVTYRFGGNFMC  
KFIKYMQLGPLYSSYVLMATAIDRYQAICFPLSNCSWTPKRSKVMIGISWVISLWFCAP  
>Zorotypus\_caudelli  
LLVILLVTLVGNLIVLFAIYVRRRCRGRHRLTRMHFFVMHLSIADLINGLLNVLPQLAWDITFRFQGGQILCKMVKF  
>Perla\_marginata  
EVTSLAAIFLTALAGNVCLLALYGHNRKLRMHFFILHLTIADMVTAVFSVMPQLWKATYRFAAGPTLCKVVKVQALG  
>Osmylus\_fulvicephalus  
RTTMALMNSVGMGVPPTPSLELVGVLAAGGGGGLLPVDPSTANSTAMHDYDRDEALQVEIGTLALIFGVTLGNGAVLIALYIRRRYSGRKKLSRMYY  
FILHLSIADLVTAFNVLPQLAWEVTYRFRGGVLCCKAVKFS  
>Leuctra\_sp  
LVTAVVANLLVLTALILRSRRQLARLHFFILHLSLADLVNLFNVLPQLVWVKSTFRFVGGTVLCKLVKFGQTLGPHLTAFILVATLWDRTHAFYCY  
>Mantis religiosa  
AILSTLFFVIVLGNSSVLLALSSRRRKLRSMYFIFLHLSIADLITALLSVLPQLAWDITRFRHGGPGLLCKLIKYGQTL  
>Arachnocampa\_luminosa  
MYSYQENILPNYSEQDKFENSNSVSLNNSNSVQQFQNLNSLLTKIEVFLLSLFLTLVIGNLIVILIIILYRNMSPKRARWFKLNKNISRMSFYIIHLSIAD  
FNVAFMSILPQLIWRQSVFVFNHSHFLCKFVAFSQQVFSVYASTFLLIVMAVDRFKCICWP IKSCSWNYRHALVPVFFSWILAAVSSPQLFLFKIQHMSVQH  
YTVETCSVKWLSKKEGLYLLFHMSTQFLIPLFVLTFLYSRIFMTVSKNIKQKHASIRFERESSKTATEINQLNQENSLNTQNGLI TEVKHSDNSIFRDK  
KFGILWWRSRFNKGRIRKILFTSTKKGKNIKFGKGTGNFLMNDQTMPKEYEMRLMLKRKETSLSDEKYSMLDKNSVYSKSFKNFP IRQTFSGKALTRS  
KIKTLKLLTIVVITYVMCSLPHYVCTFIHFLGLLSAHNHSSLFKTLVYITISTNMLFQLNSCANPFIYLFNGNICKLAKRLKTKV-  
>Diaphorina\_citri  
MUVHNVGSFLSSYILMAIAIDRYRAICHPLTYHTWNSRRSRIMIMTAWSTAFTFCIPQITIFSYQEVEKPGIYDCWASWDQEWGERAYVTWFSITVFIIPLF  
CLVYTYTCICVALWQNTTYPTTSPHKIISRAKINTIKQTIIVITLYIVCSLPIFTQLWQTNWLNQTVYVQDNVLTIIIMLLSLNSCVNPWIIYLVNSR  
ELIAALRTLCSNLRFSDDTELMTDASASGSKECGRRTESDLTFLNRTTYSNPDENGLIPLIILTFAYTICRAIINFMSKNSIRRHQFSRSRSTRDSE  
TENELCHTIVDSG  
>Blaberus\_atropos  
NTVKQMVAVLFLYVACSAPFISAQLWATWDDLAHTRPFFSGTAFTILALLYSLNSCMNPWIIYLFNRELIRFLTQQLFCRTQ  
>Frankliniella\_cephalica  
SIEPVEGGYDCWATFVPEWQRAYVTWYTCVFMIPLTVLLFTYSRICCEIWRSSASKHAPALVDGCTKCPHVHAYAYRFAPHQQPAPVSSNSFAYARSQ  
QQATQRTNPLISRAKINTVKQTVLVIAYIIICSAFFICVQLWAAWGNADNPFQGRYMTILTLLFSLNSCVNPWIIYLAFNNDLVRMLWLLVSCQTGHPSGS  
VLSAHSGGSSQSNTTQHRTCTFD  
>Tricholepidion\_gertschi  
TRGRPVIIHQGATVQADVPRPAPVNPRTSMKGISRAKIKTVKLTVVVIACYIFCSPFISVQLWATWDPNASKSPFWTGTFTTIFTLASLNSCVNPWIIY  
LTFNRDLVRLNQL  
>Carabus\_granulatus  
SRAKINTVKQTIIVIAMYIICSTPFICAQLWATWDPSTFLNGAAYTILTLNLSLNSCVNPWIIYLAFNRELPRLLLRHYAATSKNYRSAGTNSASNSGG  
VESTSLRPFKWSLCASTKSTPRY  
>Acanthocasuarina\_muellerianae  
KIISRAKINTVKQTVAVITLYIICSLPFIQAQLWQTNWLNESFYVQDNVLTIIIMLLSLNSCVNPWIIYLVSNRKLITALRTLVCNVLVSEAKVAM  
DTASGMSSSRERNESEMGLTFLNRHEDTGMSDDLTLRSRQVWVTLDPANQTR-  
>Anurida\_maritima  
SDFLCRLIKFLQIFVLYLSTYIILSMTLDRYLTVVCHHSFNRNHYGGLKSPKVMVAISWILSLIFASPAVIFSQSEIRPGVDFCWTFLGPGSVKAYVTWFW  
ISVFLPLLLICGISYGAICFKVVSFSLHESNNRKLNEVSRYSKNSRSVSSSPETQSEVVEEAPTPKDVGSRRLAQQISEVKIKTLKTLVVVLCFFVCWS  
PFCVTQLILVYNPTLPVPGNVILLLLPSLNSCTNPWIIYLAFASESLCNQRLVFLGIGLRRGSSGESIGAEQDIILRTKFKTPRPDTRPHQDKSRMTMKQVS  
TLDAIENQGAFLQLLETKSEVL-  
>Machilis\_hrabei  
GISRAKIKTVKLTVVVIACYVTCSTPFICAELWAADPNVHSSFWQGAFTILTLLASLNSCVNPWIIYLVFNPNLVRDFRHLKLMCCGGDYLHNSGIP  
SGGGFDRGTLFRSSSTSDSKAPSANQNKIAVTRTSVSSQSGVLLKRRTLNGDKQPTAVEMRNWKCDETNRPLLAETSDFIQCAIGENE  
>Glomeris\_pustulata  
KTVKLTVVVILSYIACSMPIISAMLWLVWYPEARNTPFGRSAAFTILALLASLNSCANPWIYLCFNENVAQTLGDVICCRKCRNSSATNEHGAPIVGVFSR  
SSLSDTNQRSTHVHTLAHQG-

>Dendroctonus\_frontalis  
 ICYPLTYCSWTSRRSKFMVYVIAWIASLLCCIPQVIIFSFQEVPRVYDCWATFDNEWGEQAYVVCYSVTVFIIPLFVLVYTYTTCICREIWRCSDSLRRPS  
 MSKQSTKRDRVPLISRAKICIGIWRSNKMTSAENWRKKSRSNRSVNIERNRSPFISKAMINTMRQTIIVVISLYAITSIPFIGCELWVTDTEAIKSSFANGPA  
 GAPDQGTLSNNSGQVTSKLRTRASPRGRDRLHTNQRQWMTAT-  
 >Mischocyttarus-\_flavitaris  
 QGGMVLCKLVKFFQPLGLYLSSYILTATAIDRYHAICHPLSYCSVTSRKRIRIMVYCAWSLSLILCIPQLFVFSYQEIPTNIWDCWATFDIKFGERAYVTWY  
 SLMVFLLPFIVLVYTYGICVGVWQSNKMSDAVDDRKYIRSISSTCRNRSSFISKAMINTVQTIIVVISLYAITSIPFIGCELWVTDTEAIKSSFANGPA  
 FTILTLLNSLTSCVNPWIYLSFNRELRQNLNMYFYNRNDEYSQTYYGQRGMRRSDSNDTSTRASLMSRISRYASSIIPR-  
 >Argochrysis\_armilla  
 GGNVLCVLKVKFIQPLGPLYSSYVMATAIDRYHAICHPLSYCGSSSLKRSKIMVYSAWAVALILCIPQVVVFSYQEVTPKVVDCWAVFDVAYGERIYVTWYST  
 MVFLLPFTVLLYTYGICVGVWQSNKMSDAVDDRKYIRSISSTCRNRSSFISKAMINTMRQTIIVVISLYAITSIPFIGCELWVTDTEAIKSSFANGPA  
 TILSLSSLTSCVNPWIYLSFNRELRQNLNMYFYNRNDEYSQTYYGQRGMRRSDSNDTSTRASLMSRISRYAGSMIFR-  
 >Calanus\_finmarchicus  
 ADILTAIFTLIPEIAWTTLPAFWGGDAVCKIIKFLQMLGPLYSSFLLCVTSMDRYQAICKPFKTCSEPKNSDKLVGGAVLAILCCIPQLLIFNTSSQ  
 IGCNSGEMFEKQTNFPTWTPSQYILYFSANFFIPLILLFSNCFICKTIWASSNLNWNRRTTKKENKMDSPKLYITMANGPKSKLSVQNRSTSV  
 VSRKIKSVKLTIVIIACYILCSAPFIVGQLLATLGPPIHRSKIGLQMEPLFWMTLNLSLVNPIYIWFNRNTLFRVQTSNENTTALQLSQMEVFPSSP  
 TPTRLRRLNSKNSVLRSSFIIEVVGLE-  
 >Tigriopus\_californicus  
 MATLLSSDIEAKMDKEPDNPNYSIPDSNETKGSGLDLNFTDGGPDFSRDQDLATAEVVVQAVIFVLALVGNGLVVALIRQLRRKPSRRMYRLMYHLSI  
 ADLLVAVLNVLPLIWDITHRFHGPDILCRLVKFGQVMPYIYLSFILTMAVDRVGVTKRHGSVEPKPLRPLIQGVVLAIALCALPQPFIFSIKIDDDKGI  
 YDCWADFGGEKWKLEKGVVTFVFLVFFLPFIVITSSYCIYTYRISYSRATQGSKASPQMSLASNRVVLSSVGDGSKNEDDDGATMETAVYEMKVINGRN  
 GSSSSHRSSCKSTTRSINTSCTIYRPNLAHNSHAPTGGFVRVQTEQIVLLSKAKRKSLSMTAIVSVCFVAVCWLPWCVTMLLMSFDIQVGGDKVHPLMVIFA  
 LLASLNSTNPNWIYLCFSAVQLQVVKHLVGMRSITGGPDSLGGADADRPQTHHRTKRILFTRKAEPLKGNPLGARPHPLFALQDQEIIVRAGIRSEPNLS  
 SHRPNVKNPLPASNQNKSWTKT  
 >Atta\_cephalotes  
 MSHDLNSSSSSELPLDDARDEYLARWEIAVLTSIFLITIIIGNVLVLLALYARRRYQRRKFTRMVFFIMHLSVADLLTGLFDVLPQLAWDITFRFQGGAVL  
 CKLIKFGQPFGLYSSYILTATAIDRYHAICHPLSYCSVTSRKRIRIMVYCAWSLSLILCIPQLFVFSYQEIPTNIWDCWATFDIKFGERAYVTWY  
 LFPFIVLVYTYGICVGVWQSNKMSDAVDDRKYIRSISSTCRNRSSFISKAMINTVQTIIVVISLYAITSIPFIGCELWVTDTEAIKSSFANGPA  
 NSLTSCVNPWIYFAFNKELRVALTCFFYRKKDYSLTYDIDARQNASDVPSTSSFSRISRLASSKIFG-  
 >Brachionus\_koreanus gb|GBXV01023685.1| TSA: Brachionus sp. 'koreanus' Rotifer\_01189 transcribed RNA  
 sequence  
 MTSYQENMLLDYSEQKKSEELQNSFNNSDSSEQFQINNKLLTQIEVFLSCLFVLTIVIGNLTVILIIILYRNMSSKRARWFKLNKNISRMSFYIHL  
 IADLNVAFMSILPQLIWRQSVVFNHSHFLCKFVAFSQVFSVYASTFLLIVMAYDRFKCICWPIKCSWNCRHALIGIFVAWIIAATISSPQLFLFKIQHMN  
 AHVYTVETCSVKWMSKRHEGLYLLFHMSTHFLIPFFVLTLYLSRIFLTVSRNISRKHASVRFERESSKTGTEINQLNRENSLNTQNGLITEIKNESENSIF  
 RDKKTGIIWLRSFNKSIRHKILYTSKKSQKNIKFSRQNFSLNNSLPKEYEMKMLKKNPDSSEDRYSRMLDKNSVYSKSFKNFPIRQTFGKAL  
 TKSIIKTLKLTTLTVVITYVMCSLFPYVCTFIHFLGLSAHNNSLFTFKILVFATISTNMLFQNLNSC

**(B)**

>Tetranychus\_urticae gi|1005961572|ref|XP\_015789083.1| PREDICTED: isotocin receptor-like  
 RMLSSFGSLFSTLSVFNSTNETSSTLPSLVLPFDVNLTSRYLKAIVSTGSPASLSSSSAHSRDNLALEIITLSAIFVMIVFNSTVLLALILSRIKL  
 RMYFFLLHLSIADLITAFANVLPQLIWEITERFYGGNVLCKGKYLQILGPLYSSFTLCATAIDRYRAICFPLESRSALNRSKLKVSIWGLALICCLPQ  
 LFIFSYRQIPNSPGVYECWGTFIQPYGERLYVTWYALTSFFIPIFVILIFTSNICLELWRNGRRIKKANLSQSHSTAYFSKAKIKTKVLTVTIIICYICCS  
 SPFNVVQIWAYWAPGAQESSLWRGPLITIAMLLPSLNSCVNPWIYLFNFRNLLSTLTKLFCYCSNTNINAGNRSKTLDDSSVNIPEHCSSINRNGSRTIF  
 VSQMSKYSDDKPSVEAHS  
 >Nasonia\_vitripennis gi|288558761|ref|NM\_001172274.1| Nasonia vitripennis neuropeptide receptor  
 (ITR), mRNA  
 MEESATSMIAAPAEWRDES LAVWEVIVLALILTTTFMGNVLVLFVFAIYLKRCRGRQRRLTRMHFFVMHLSVADLITGLLNVLPLQLAWDVTFRFQGGPILCK  
 LVKFCQPLGSLYSSYILTATAIDRYHAICHPLSYCYRTTSRKRIRIMVYCAWSLSLILCIPQLFVFSYQEIPTNIWDCWATFDIKFGERAYVTWY  
 FCVLTFTYAEICCSIWRNREVMVLASHERQALTKEGRSQTTLSKAKINTVQTIIVVISLYAITSIPFIGCELWVTDTEAIKSSFANGPAFTILALL  
 LTSCVNPWIYLFVSYELRAALTKFLRSLIKRDRSRFERASSNANSNETRSSKRSFISRMSRYTSFIIYGPMTIEIVNKLYI-  
 >Orussus\_abietinus gi|817193573|ref|XP\_012272252.1| PREDICTED: vasopressin V1b receptor-like  
 MIHEDMDAEDPPTTNPVEDFRDSDLARWEIFTLAAILLALLENLVLALYRGRRLSRIQFIFILHLSIADLITGLLNVLPLQLAWDVTFRFQGGDLL  
 CRLVKFGQPFGLYSSYILTATAIDRYHAICHPLSYCYRTTSRKRIRIMVYCAWSLSLILCIPQLFVFSYQEIPTNIWDCWATFDIKFGERAYVTWY  
 FLLPLCVLVYTYGICVGVWQSNKMSDAVDDRKYIRSISSTCRNRSSFISKAMINTVQTIIVVISLYAITSIPFIGCELWVTDTEAIKSSFANGPAFTILALL  
 NGCVNPVHLGFDPELREVILRHLQAPTRSKQEADRKP  
 >Polistes\_canadensis gi|954548184|ref|XP\_014616661.1| PREDICTED: vasopressin V1a receptor-like  
 MNETTNSSTVANEEKDTRDENLAKWEIVLLANILIFTIFGNSLVLLSLYLRKYRAHKKLSRMVFFIMNLSIADLITGLLDVLPQLAWDITFRFQGGVLVLC  
 KLVKFFQPFGLYSSYILTATAIDRYHAICHPLSYCSVTSRQRIRIMVYCAWSLSLILCIPQLFVFSYQEIPTNIWDCWATFDIKFGERAYVTWY  
 PFIVLVYTYGICVGVWQSNKMSDAVDDRKYIRSISSTCRNRSSFISKAMINTVQTIIVVISLYAITSIPFIGCELWVTDTEAIKSSFANGPAFTILALL  
 NSLTSCVNPWIYLSFNRELRQNLNMYFYNRNDEYSQTYYGQRGMRRSDSNDTSTRISLMSRISRYTSSIIIR  
 >Metaseiulus\_occidentalis1 gi|391341506|ref|XP\_003745071.1| PREDICTED: oxytocin receptor-like  
 MNSSAGNFGDARDETIAHVRITVLCFCLLFTLGGNLFVFLVTRNRPKSVHQLHIYHFMVHLSLADMLVGVFNILPQIVWEIYFRFRWGNIAACKFVKFMQI  
 FVLVYTYGICVGVWQSNKMSDAVDDRKYIRSISSTCRNRSSFISKAMINTVQTIIVVISLYAITSIPFIGCELWVTDTEAIKSSFANGPAFTILALL  
 LCRASSKRLMSDAKLTIRMTVMVVLVFLVLCWTPFCCAQLYLVFGGEEASTFVTMCLMVPNLNSCANPWWYLSFSTDLRRLVNFCSLIHLRGNRYGEE  
 KPCSTRANAIVCEKPARQLRGYRIS  
 >Metaseiulus\_occidentalis2 gi|391328891|ref|XP\_003738916.1| PREDICTED: vasopressin V1a receptor-like  
 MEYNTDITDFVQPENWVLSVKCATLVIIFFLTLSSNLFVLAHLLRNQRPLSRVQLFMLHLTVADILVALLNLPQLAWDLTIQFRGAVLCKLVKFA  
 QVYVLYLSTYILTGMSLDRLITMRAIESQWQTASLRSDHQSSDKSPQSHKIKFNHRCRVGYRKFVAKKLVFAWFLAALSIPQLFLFSYTRIHDHGSW  
 YDCKANFSWHRFGQRIYTYFYVVLILGVVVMMLFQIQLIIRQHMTTTSAPANFGVNTAGFFESNRRIKAKVIRVMKMTFTVTKLFCIVCWSPY  
 SIAELLLAYKIAGGEHVSPFVFMVLLASLNSAVNPWIYTAFTNSFACKSLRTLKPEVHLITV  
 >Strigamia\_maritima Chipman AD et al. PLoS Biol. 2014 Nov 25;12(11):e1002005. doi:  
 10.1371/journal.pbio.1002005. eCollection 2014  
 MSNESHWEDDLTDNATSNAPPQSSAIADAKLTVLALMFATIMLGNTIVITSLIRKRLTRMYFFILHLCIADLIVAFVLPQLCWDVTHRFQGNDFL  
 CKVIKFGQLGPLYSSYILVGMADRYLAICFPLNSWAATRSGKMGVCVAVVSVVSSPQMFVLSYKYVSVLKYWECWVDFLEERAYVTWYFVANTFVP  
 LLVLVYTYSAICWAVWRNFRHKKNSPKGDFDSAASSPTTATHLSVQNVNHIQRNGSCRFKASESVNPRSHGLQRISRAKIKTKVLTVVVITCYILCSMP



YTCAMMWVAYDKRAQETAIFYKGGFLFPVLLVASLNSCVNPWVYLLFNKNLVHTLRLHYLCCSKENEMKSHRTLATYTSRSTFSESVGPVALQSLPSSNNF  
 LRVDNKNLNVRAVAVSDSALYSCEKRHSSPNLNVKSAASTLVLCSSQHHHTDQNHKLDGVTMETQCA  
 >Strigamia\_maritima\_2 Chipman AD et al. PLoS Biol. 2014 Nov 25;12(11):e1002005. doi:  
 10.1371/journal.pbio.1002005. eCollection 2014  
 MATHAEGDSYTRNPPPTKIPMDNNPNYNNKTTDGMIRDENLASIEIAVQSIILVVAIISNSFVFAALCCQRRFRPTSRMYLFMLHLSVADLLVAFLL  
 SLLPQLIWDVTRFRQGSIDLRCVVKYLQVMVYLSTYILVMMAVDRCAVCSWITGHWNSLRAAKLMIVGAWLAFVLAIPQAIIFGKMEIRPGVHDCWAH  
 FEQPWGEKAYVTFWVLSFIIPILVIAAASYGFCYTLWIYDEEHGRSGDVIALRAVGNVTGGGDDTVDTSCLRSYRVRVAGVSNPNPISEAKVTKLTLFLV  
 VCFVVCWSPFCITQLVLTFFNPSPDAQIGSVEVILLLLASLNSCTNPWIYVAFSGSLLNQLRMCLGLGLTRPKDIASIGDEEPQPPQPPQNTKLPSTKSEM  
 V  
 >Ixodes\_scapularis1 gi|215501697|gb|EEC11191.1| vasopressin v1a recpetor, putative  
 MDVPSNQPEFAASVPTVLFNFASTNLASTETRDESLALVELAVLTLIFAFVTVMGNSTVLLALATRSMKTRMYFLLHLCSVDLITAFVTLVLPQLGWDAT  
 YRFQGGNLACKAVKFGQLLGPYLSYVLLVAVDQYQAI CFPLSNCSWPTPKSKLLICAAWVAALLCCVPQVFI FSYQEIVSPEVDFCWGTYVESWGLRAYV  
 TWYGMSVFFVPLMVLTFYVICRSIWRNLYLKRKSSDAESWKGERRAYRFRGLAHNGTKQDSSFFVGRSHSVRGLSRAKIKTVKITVVVIALYVVCSSPFI  
 CVQMMWYSPHVDMANPWISE  
 >Ixodes\_scapularis3 gi|215501196|gb|EEC10690.1| vasopressin v1a recpetor, putative, partial  
 MDLVANQDQPAFSTSLPDLDDVPVNETFWTGTREDESLAQIELGLVTAIFFTFTVIGNTTVAALAARRSKMSRMYFLLHLCSVDLITAFVTLVLPQLGWD  
 TYRFRGGNLACKTKVFGQLLGPYLSYVLLVAVDQYQAI CFPLSNCSWPTPKSKLLISAAWVASLLCCVPQVFI FSYQEI SPKVFDCWGTVEPVGWGLRAY  
 VTYWGVSVFFVPLVLLSFTYVICRSIWRNLYLKRKSSDAESWKGERRAYRFRKGTAGNGTKQDSSFTVKITVVVIALYVVCSSPFI CVQMMWYSPDAD  
 >Ixodes\_scapularis2 gi|215493320|gb|EEC02961.1| vasopressin v1a recpetor, putative, partial  
 QVEVAVLTFIFGFTVLGNTCVLVALAARRSKMTRMYFLLHLCSVDLITAFVTLVLPQLGWDATHRFRGGNLVCKAVKFGQLLGPYLSYVLLVAVDQYQ  
 AICFPLSNCSWSPCKKLLIAGAWVAALVCCVPQVFI FSYQEVAPGVDFCWGTFQAPWGLRAYVTVSVSVFFVPLAVLSFTYVICRSIWRNLYLKRKSS  
 ADHSVRGMSRAKVKTVKITVVVIALYVVCSSPFI CVQMMWYSPDADVLDVWINATVITLMLLNSLNSCVNPWVYLLFNRSILVHTLRLHQICRCPDAKNVSS  
 GIAGTGSQPSAVILADLTQTEAQSVLSYKSSPTDTSARLATAVVGKRGATDVEEDLQCSLEKTS  
 >Ixodes\_ricinus gi|1016843980|gb|JAR88791.1| putative vasopressin v1a receptor  
 MDLVANQDQPAFSTSLPDLDDVPVNDTSWTGTREDESLAQIELGLVTAIFFTFTVIGNTTVAALAARRSKMSRMYFLLHLCSVDLITAFVTLVLPQLGWD  
 TYRFRGGNLACKTKVFGQLLGPYLSYVLLVAVDQYQAI CFPLSNCSWPTPKSKLLISAAWVASLLCCVPQVFI FSYQEI SPRVDFCWGTVEPVGWGLRAY  
 VTYWGVSVFFVPLAVLSFTYVICRSIWRNLYLKRKSSDAESWKGERRAYRFRKGTAGNGTKQDSSFFVGRSHSVRGLSRAKIKTVKITVVVIALYVVCSSPFI  
 CVQMMWYSPDADMTYVNTICRSITWRNLYLKRKSSDAESWKGERRAYRFRKGTAGNGTKQDSSFFVGRSHSVRGLSRAKIKTVKITVVVIALYVVCSSPFI  
 ICVQMMWYSPDADMTYVNTICRSITWRNLYLKRKSSDAESWKGERRAYRFRKGTAGNGTKQDSSFFVGRSHSVRGLSRAKIKTVKITVVVIALYVVCSSPFI  
 >Limulus\_polyphemus1 gi|926615389|ref|XP\_013772773.1| PREDICTED: oxytocin receptor-like  
 MSTLDFGETPEILNVFNMNSTIINNTKDKGIQRDETIARIEVGLASIFTLTILGNMCLVALAVRRIKMARMYFLLHLCSVDLITAFVTLVLPQLAWDV  
 TYRFYGGNVLCKVIKYLQILGPYLSYVLLVMTAIDRYQAI CFPLRNCVWTPRKSCLMIAAWTISMLCCVPQVFI FSYQKVLIEPI FDCWGVFIQPWGK  
 VYLVWYALSQFFIPLVITFTTCVRI CKNVVYVNFHLRGNKSSRSRSHMSRAKVKTVRITVVVIAICYI ICSTPFIIVQLWAYWSPYAQTSPIWKGPVAIL  
 MLLASLNSCVNPWIYLAFNHNLVLTALKHICCHERSQGYSPQVVENINNTTSRSQTDNEICTSYPLSLRCGVHYTSSFRLLKTKITGCRPCPNIQDLHDE  
 AETESA  
 >Limulus\_polyphemus2 gi|926636334|ref|XP\_013784095.1| PREDICTED: oxytocin receptor-like  
 MSTLAKGETTGFLNLSFVNLSTIINNTKADVQRDETVARIEVAVLATIFTLTILGNITVLLVALVRRRIKMARMYFLLHLCSVDLITAFVTLVLPQLAWDV  
 TYRFYGGNVLCKVIKYMQLGPYLSYVLLVMTAIDRYQAI CFPLRNCVWTPRKSCLMIAAWTISMLCCVPQVFI FSYQKVSDEPVTDFCWGFIQPWGK  
 VYLVWYAVSQFFIPLVIAFTYIIRICKSVVYVNLQMRQASNCETFTVPSRSHCMRGLSRSKVKTFKITVVVITCYI ICSTPFIIVQLWAYWSPYAKNSIWK  
 GPTVAIIMLLASLNSCVNPWIYLAFNHNLVLTALREVCCQTSKFSFSSQVPENTDNTFSRSECSYPLSVRVTGSRHKFPDGGSTTRTRKRLCRELGSKNES  
 DTVGENRGSVQTQFETTSEPGKFFVTRDKDKTLC  
 >Limulus\_polyphemus3 gi|926627326|ref|XP\_013779233.1| PREDICTED: oxytocin receptor-like  
 MSSLKEEQTELTNASFVNFSPINENITVGDTRDETIARIEVAVLATIFTLTILGNITVLLVALVRRRIKMARMYFLLHLCSVDLITAFVTLVLPQLAWDAA  
 HRFYGGNVLCKVVKYLQILGPYLSYVLLVMTAIDRYQAI CFPLRTRCTWTPRKSCLMIVGAWIISILCCFPQVFI FSYQKVSDDPLVDFCWGTFI QPWGK  
 VYLVWYALSQFFIPLVITFTYVNTVKNVYLRKKNFICRVSVPDLRSLAKVKTVRITVVVIAICYI ICSTPFIIVQLWAYWSPYAKNSIWKGPVAILM  
 LLASLNSCVNPWIYLAFNHNLITALKQLCCRSVLQDYMAQSTEATSNNNANRSYPTENEVNSYPLSFFIAQEEPVMLRNLKKKQ  
 >Daphnia\_magna1 gi|940945035|gb|JAK30878.1| Vasopressin V2 receptor  
 MASSSLLSNVTNVTTELASSRDEKLASIEIGTLSFILLAVTNSLNTMLIAIWRQRNRPLSRMYFFMMHLSLADLLVALFNILPQLAWDITYRFHGGDVL  
 CRFVKYQIMTLYLSTYILMFMVAVDRYRAVCCRNHLHWSLKVAKCFVAASWVMSMLFAIPQAVIFHEEEISVGVTDWCWQFAEPWGAAYVTFVVSIFGA  
 PLLVVAVCYGVICRQIWIYYSQSAQPSLLPSDNSAIPSHSITETGSTLSVMRRWFLRAGMRWQKSRNSNAIKNNSATASQLSDTIPNKISPMLPQPPAA  
 PQRCCQMSLRRSNQNRITKAKMKTIKLTLAVVLCFVACWAPFCITQLIMVYCPPTSQADVSPVAVI ILLASLNSCVNPWIYLAFFSGSLLNQMRVCLGL  
 RWRGQDKDSIGEDDRRGAAGPAGGQPADTNHRFGRGPRRAQTRDQHRQVMAEQQLLPAGEQHPAMPLATKCTRADIVTHLGNTKKQLQFQQNHQHVKEIG  
 >Daphnia\_magna2 gi|942393099|gb|JAN7849.1| Vasopressin V2 receptor  
 MASSSLLSNVTNVTTELASSRDEKLASIEIGTLSFILLAVTNSLNTMLIAIWRQRNRPLSRMYFFMMHLSLADLLVALFNILPQLAWDITYRFHGGDVL  
 CRFVKYQIMTLYLSTYILMFMVAVDRYRAVCCRNHLHWSLKVAKCFVAASWVMSMLFAIPQAVIFHEEEISVGVTDWCWQFAEPWGAAYVTFVVSIFGA  
 PLLVVAVCYXXXXXXXXXVQFAEPWGAAYVTFVVSIFGAPLLVVAVCYGVICRQIWIYYSQSAQPSLLPSDNSAIPSHSITETGSTLSVMRRWFLRAG  
 MRWQKSRNSNAIKNNSATASQLSDTIPMRSLATQQASNPLTTEENKISPMLPQPPAAPQRCCQMSLRRSNQNRITKAKMKTIKLTLAVVLCFVACWAP  
 FCITQLIMVYCPPTSQADVSPVAVI ILLASLNSCVNPWIYLAFFSGSLLNQMRVCLGLRWRGQDKDSIGEDDRRGAAGPAGGQPADTNHRFGRGPRRAQ  
 RDQHRQVMAEQQLLPAGEQHPAMPLATKCTRADIVTHLGNTKKQLQFQQNHQHVKEIG  
 >Daphnia\_magna3 gi|939881383|gb|JAJ41077.1| Vasopressin V2 receptor  
 MASSSLLSNVTNVTTELASSRDEKLASIEIGTLSFILLAVTNSLNTMLIAIWRQRNRPLSRMYFFMMHLSLADLLVALFNILPQLAWDITYRFHGGDVL  
 CRFVKYQIMTLYLSTYILMFMVAVDRYRAVCCRNHLHWSLKVAKCFVAASWVMSMLFAIPQAVIFHEEEISVGVTDWCWQFAEPWGAAYVTFVVSIFGA  
 PLLVVAVCYGVICRQIWIYYSQSAQPSLLPSDNSAIPSHSITETGSTLSVMRRWFLRAGMRWQKSRNSNAIKNNSATASQLSDTIPMRSLATQQASNPL  
 TTEENKISPMLPQPPAAPQRCCQMSLRRSNQNRITKAKMKTIKLTLAVVLCFVACWAPFCITQLIMVYCPPTSQADVSPVAVI ILLASLNSCVNPWIYLA  
 FSGSLLNQMRVCLGLRWRGQDKDSIGEDDRRGAAGPAGGQPADTNHRFGRGPRRAQTRDQHRQVMAEQQLLPAGEQHPAMPLATKCTRADIVTHLGN  
 TKKQLQFQQNHQHVKEIG  
 >Daphnia\_magna4 gi|942156180|gb|JAM92944.1| Vasopressin V2 receptor  
 MASSSLLSNVTNVTTELASSRDEKLASIEIGTLSFILLAVTNSLNTMLIAIWRQRNRPLSRMYFFMMHLSLADLLVALFNILPQLAWDITYRFHGGDVL  
 CRFVKYQIMTLYLSTYILMFMVAVDRYRAVCCRNHLHWSLKVAKCFVAASWVMSMLFAIPQAVIFHEEEISVGVTDWCWQFAEPWGAAYVTFVVSIFGA  
 PLLVVAVCYGVICRQIWIYYSQSAQPSLLPSDNSAIPSHSITETGSTLSVMRRWFLRAGMRWQKSRNSNAIKNNSATASQLSDTIPMRSLATQQASNPL  
 TPDTIPMRSLATQQASNPLTTEENKISPMLPQPPAAPQRCCQMSLRRSNQNRITKAKMKTIKLTLAVVLCFVACWAPFCITQLIMVYCPPTSQADVSP  
 AVI ILLASLNSCVNPWIYLAFFSGSLLNQMRVCLGLRWRGQDKDSIGEDDRRGAAGPAGGQPADTNHRFGRGPRRAQTRDQHRQVMAEQQLLPAGEQHP  
 MLATKCTRADIVTHLGNTKKQLQFQQNHQHVKEIG  
 >Daphnia\_pulex tr|K9JBV2|K9JBV2\_DAPPU Oxytocin/vasopressin receptor-like protein OS=Daphnia pulex  
 PE=2 SV=1  
 MSTNMSNATEEPSSSLRDEKLASVEISTLSVILVAVTNSLNTMLIAIWRQRNRPLSRMYFFMMHLSLADLLVALFNILPQLAWDITYRFQGGDVL  
 YAVMTLYLSTYILMFMVAVDRYRAVCCRNHLHWSLKVAKCFVAASWVMAIFSIQAVIFHEEEISVGVTDWCWQFAEPWGAAYVTFVVSIFGAPLLVI  
 GVCYGVICRQIWIYYSQSAQPSLLPSDNSAIPSHSITETGSTLSVMRRWFLRAGMRWQKSRNSNAIKNNSATASQLSDTIPMRSLATQQASNPLT  
 SAEA

KVIRSLPPLSPQCCQOMPLRRSNSNQNRITKAKMKTIKLTLAVVLCFVACWAPFCITQLIMVYCPPTSQADVSPVAVIILLASLNSCSNPWIYLAFFSGS  
LLNQMRVCSILLRSTHLEFIEQLLFFIRVSRKSRNI  
>Microplitis\_demolitor gi|665813630|ref|XP\_008555379.1| PREDICTED: vasopressin V1a receptor-like  
MMGNSTQPDTRDENLAIWEITVLAJNLIITIGNCLIFFALYLRHYGRQRKLTMRMYFFMLHLSIADFTVIGFVNLVLPQLAWDITFRFQGGYGLCKI IKFLQ  
PFGNYLSSVLTATAIDRYQAICYPFNYCRTSSLSKSRVMVYGAWLSFVLCIPQVIVFVSYQEISPGVWDCWASFSLPYGERIYVTVYSITIFLLPFLVLLY  
TYASICANIRNTEISDRPDHVNKNKINFNKNRQPLISRAKIKTVKQMITVSVLSVMTSSPFIGCQLWATWDPQAANSSFIGPAFTILTLMSSLTSCV  
NPWIYLGFNRELRNLISNYLKLKCKQNVINYDIDTSYVNSNGSSTKSSIVTMFVAGSMYHRQTYQERSTDFILTRRQS  
>Vollenhovia\_emoryi gi|795106077|ref|XP\_011881673.1| PREDICTED: vasopressin V1a receptor-like  
MSRDLNSSSSTSPSLSEWPSNDARDEYLAKWEIAVLTSIFLVTLLIGNALVLLALYIRRRYQRRKFTRMVFFILHLSVADLLTGLLDVLPQLAWDITFRFQ  
GAALCKLIKYGQPFGLYLSSYILTVAIDRYAICHFPFSYCGITSRSSKMMVYGAWLAATLVCVPQIFIFSYTEISPGVWECWATFNLKYGERAYITWYSV  
TQFLLPFIVLVYTYTRICMSIWTSSKMSGVVDLKRNSKASFFQRNRDPIISKAMINTVKQTIIVVVTLYIITNIPFIGELWATWDPATSSPFFTGAAFTI  
LSLLNSLTSCVNPWIYFAFNKELRAALTNFFCSKDYSLTYDIDVRQNASDVPSSSTSSFSRISRLASSKIFG  
>Cerapachys\_biroi gi|759037579|ref|XP\_011350516.1| PREDICTED: vasopressin V1a receptor-like  
MSYDLSSSLPLSLSPSSPSSSSPSSLEVSDDLREYLAWEIAVLTSIFLITIGNGLVLFALYARRCYQRRKFTRMVFFILHLSIADLLTGLLDVLP  
QLAWDITFRFQGGAVLCKLIFGQYFGLYSSYILTVAIDRYAICHFPFSYCAVTSRRSKMMVYGAWLAAILCVPQVVFVSYKEISPGVWECWATFYLK  
YGERAYITWYSVTQFLLPFIVLVYTYTRICMSIWTSSKMSGVVDLKRNSKASFFQRNRDPIISKALINTVKQTIIVVVTLYIITNIPFIGELWATWDPKAS  
TSPFFTGAAFTILSLLNSLTSCVNPWIYFAFNRELRRAALTNFFCRKDYSLTYDIDAHQNASDVPSTTSSFSRISRLASSKIFG  
>Harpegnathos\_saltator gi|749796630|ref|XP\_011151734.1| PREDICTED: vasopressin V1a receptor-like  
MSYDLNSSLPLSPSEWPSNDARDEYLAKWEIAVLTSIFLITLIGNALVLFALYVRRYQRRKFTRMVFFILHLSIADLLTGLLDVLPQLAWDITFRFQ  
GAVLCKLIKYGQPFGLYLSSYILTVAIDRYAICHFPFSYCNVTSRRSKMMVYAATLAVVLCVPQIFIFSYQEISPNVWECWATFHLKYGERAYITWYSV  
TQFLLPFIVLVYTYTRICMSIWTSSKMSGVVDLKRNSKASFFQRNRDPIISKALINTVKQTIIVVVTLYIITNIPFIGELWATWDPRAAISPFILTGAAFTILCL  
LNSLTSCVNPWIYFAFNRELRVALTNFFCRKDYSLAYDVIARQNTSDAPISITSSFSRISRLASSKIFG  
>Dinoponera\_quadriceps gi|951533502|ref|XP\_014470481.1| PREDICTED: vasopressin V1a receptor-like  
isoform X2  
MSDDLNSTSSPPSASEQTPVDGRNEDLAKWEIALTSIFLITLIGNTLVLLALYARRRQRRKFTRMVFFILHLCIADLLTGLFDVLPQLAWDITFRFQGG  
AVLCKLIKFGQPFGLYLSSYILTVAADRYAICHFPFSYCVTSRRSKMMVYVWVLLAVVLCVPQVIFISYQEISPNVWDCWATFNVKYGERSYVTVYSVT  
QFLLPFIVLVYTYTRICITITWTSNKMSGVVDLKRNSKASFFQRNRDPIISKALINTVKQTIIVVVTLYIITNIPFIGELWATWDPGAATSPFHTAAFTILC  
LNSLTSCVNPWIYFAFNRELRVALTNFFCRKDYSPAYDAVAQNASDAASTSSFSRISRLASSKIFG  
>Monomorium\_pharaonis gi|826425402|ref|XP\_012527228.1| PREDICTED: vasopressin V1a receptor-like  
isoform X2  
MSRDLNSSSPSEWPLDDARDEYLARWEIAVLTSIFLITLIGNTLVLLALYVRRYQRRKFTRMVFFILHLSVADLLTGLLDVLPQLAWDITFRFQGGAVL  
CKLIKFGQPFGLYLSSYILTVAADRYAICHFPFSYCVTSRRSKMMVYGAWLAAILCVPQVIFISYMEIAPDIWECWATFVMPYGERAYITWYSVTQFL  
IPFIVLYTYTKICVSIWTSNKISGIVDFKKGKANSFQRNRDPIISKAMINTVKQTIIVVVTLYIITNIPFIGELWATWDPKASSPFFTGAAFTILSLL  
NSLTSCVNPWIYFAFNKELRMLINFLCGKDYSLTYGNHNVSL  
>Athalia\_roseae gi|817066760|ref|XP\_012255235.1| PREDICTED: vasopressin V1a receptor-like isoform X2  
MLCGSGMCATANEALKVDGDRDTRDEDIANWEVATLAAMFVAVFGNSLVVTVLALYLRVYQRRKFTRMVFFILHLSIADLLTGLLDVLPQLFWEI  
TYRFQGGPILCKLVKFGQPLGPLYLSSYVLMVMTALDRYQAICHPLNYCSVTSRRSKIMVYLAWGLSLALCIPQLVVFVSYQEASPGVWDCWGTFFYSPLGERAY  
VTWFSISAFILPLLVLYTNVSICLAIRWNTGIAAGEARTDGTLLRQGSVISRKINSIKQMVAVISFYAASSPFFVASLLVWTPDGAVNSPFFEGAAFA  
ILTLMSLNSCNPWIYLTNRELPRTLFARIYSSGRSASARTREGRRRCVSTETPCNSSGSGSTGTSVESYASRMSRYAYAILGKSDTANSKEFHCLQSS  
SLRGIRNELE  
>Pogonomyrmex\_barbatus gi|769855843|ref|XP\_011639495.1| PREDICTED: vasopressin V1a receptor-like  
isoform X1  
MSHDLNSSLSEWPPDDARDEYLARWEIAVLTSIFLITLIGNSLVLLALYTRRRYQRRKFTRMVFFILHLSIADLLTGLLDVLPQLAWDITFRFQGGAVL  
CKLIKFGQPFGLYLSSYILTVAIDRYAICHFPFSYCVTSRRSKMMVYGAWMLAVILCVPQVIFISYMEISPGVWECWATFYLYGERAYITWYSIMQFLL  
PFIVLVYTYTRICMSIWTSSKMSGVVDLKRNSKASFFQRNRDPIISKAMINTVKQTIIVVVTLYIITNIPFIGELWATWDPKASTSPFFTGAAFTILSLL  
SLTSCVNPWIYFAFNKELRVALTNFFCRKDYSLTYDIDARQNALDVPSSSTSSFSRISRLASSKIFG  
>Solenopsis\_invicta gi|751213591|ref|XP\_011159612.1| PREDICTED: vasopressin V1a receptor-like isoform  
X1  
MSHDLNSSLSSSEWPPDDARDEYLARWEIAVLTSIFLITLIGNSLVLLALYTRRRYQRRKFTRMVFFILHLSVADLLTGLLDVLPQLAWDITFRFQGG  
AVLCKLIKFGQPFGLYLSSYILTVAIDRYAICHFPFSYCVTSRRSKMMVYGAWMLAVILCVPQVIFISYMEISPGVWECWATFYLYGERAYITWYSIMQFLL  
QFLIPFIALTYTYTKICVSIWTSNKMSGVVDLKRNSKASFFQRNRDPIISKAMINTVKQTIIVVVTLYIITNIPFIGELWATWDPKASSPFIGAAFTIL  
SLLNSLTSCVNPWIYFAFNKELRAALTNFFCRKDYSLTYDIDARQNASDVPSSSTSSFSRISRLASSKIFG  
>Nilaparvata\_lugens gi|549137481|dbj|BA001091.1| neuropeptide GPCR A41  
MIBANYTFSTERNVESVAVSNGRDEDLARVEATLAAITLAIILAGNSTVVLVALYMRRTWGGRRKLSRMVFFILHLCIADLVTLGLLVFPQLIWDITYRF  
RGGPLCKLVKYGQTLGPLYLSSYVLMATAMDRYKAICHPLTYCSWTSHHARVQCAWATALLFCIPQVTFISYMEVPGSPGDYDCWATFRDWRGERAYVT  
WYSVSVFLPVLIVLYTYTRICMSIWTSSKMSGVVDLKRNSKASFFQRNRDPIISKAMINTVKQTIIVVVTLYIITNIPFIGELWATWDPKASTSPFFTGAAFTILSLL  
SCVNPWIYLVSNKELMRGLRQLLGGCKYALSSDYRGNSAAESGSGCGAGSCSKRSEVTNTTSLPRKPLVAEQPLPEVTPIRRWVVTIPPNVREERECL  
QLFSGLNNERILPRSQQQHQQRAIRTSPPCRAARCRDL  
>Halyomorpha\_halys gi|939664743|ref|XP\_014279829.1| PREDICTED: oxytocin receptor-like  
MFLYFRSLYETRMVAFSSMGDASYSYADKDNITSTVPSRVLCPNDSINCSAVHERDEDLAKIEMATLAVFMVMTVVGNAGVLAALFARRQSATRTRKVP  
MNFVFLHLCVADMCTAWNLILPQLAWEVTFRFKGGFELCKSVKFGQTLGPLYLSSYVLTVAIDRYAICHPLTYCSWSSKRARGMIMGAWALSITFCTPQL  
TIFSYQEVAPGVDFCWA VSEP YGERVYVTVNSVVFVPLVSLIYTYTCICLTIWHNTGPLSASAPHKVVSRAKINTIKQTVAVIALYIACSLPFI SAQL  
WATWDPHATSSPFLSGGTFTILTLLSSLNSCNPWIYLTNSQDLMEALWETIICRKNKDRPENVTGSGGSSGRPHQSQCTLAGQHTHYAKVVALPPNLS  
KTMRLRFRTPNRRNVWSSLEAKYETDTSKLSPEL  
>Acromyrmex\_echinator gi|332020179|gb|EGI60623.1| [Arg8]-vasotocin receptor  
MSHDLNSSLSSSELPLDDARDEYLARWEIAVLTSIFLITLIGNVILLALYARRRYQRRKFTRMVFFIMHLSVADLLTGLFDVLPQLAWDITFRFQGGAVL  
CKLIKFGQPFGLYLSSYILTVAIDRYAICHFPFSYCVTSRRSKMMVYGTWTLAAMLCVPQVIFISYMEISPGVWECWATFYLYGERAYITWYSVMQFL  
LPFIVLVYTYTRICMSIWTSSKMSGVVDLKRNSKASFFQRNRDPIISKAMINTVKQTIIVVVTLYIITNIPFIGELWATWDPKASTSPFFTGAAFTILSLL  
NSLTSCVNPWIYFAFNKELRVALTCFFCRKDYSLTYGNHNSLFLSLSLSLYIYIYISSHVCICIIPSNWIITRNINIVIFICHFLSDIDARQNTSDVP  
SSTSSFSRISRLASSKIFG  
>Tribolium\_castaneum tr|A3RE84|A3RE84\_TRICA Arginine vasopressin receptor OS=Tribolium castaneum  
GN=avpr PE=2 SV=2  
MYTPKLSQMDISENSTYLFDKHEDRNTDRDENLARVEATLAIIFLVTVIGNSTVLLALWTRRRYAGRRKLSRMVFFILHLSIADLLTGLFDVLPQLAWD  
ITYRFYGGFLLCKVVKYQTLGPLYLSSYVLMATAIDRYQAICYPLTYCSWTSRRSKMMVYLAWVSLAFCIPQLTIFTYTSVGEDEYDCWATFQEPWPKRA  
YVTVYSISVFMVPLVVLIFTYTSICIEIYWQSSSESLRPRSSQKSAPGKRTPLISRAKINTVKQTIIVVVTLYIITNIPFIGELWATWDPQSPFIDGPVFI  
LTLVYSLNSCNPWIYLAFNRELRLLRHYTASSKNYRATGGSANVSGDAQVSTSLRPF SRWSLCSNARSNKYPTRPVPHRPFVAQYNARRWIVTTTT

(C)

**Polistes dominula** PdomSCFr1.2-0007, whole genome shotgun sequence

Sequence ID: [gb|LMBU0100007.1](#)|Length: 3730956

Number of Matches: 4

Range 1: 2381887 to 2382378 [GenBankGraphics](#)

Query: *Polistes canadensis* gi|954548184|ref|XP\_014616661.1|

Alignment statistics for match #1

| Score         | Expect                                       | Method                       | Identities   | Positives    | Gaps        | Frame |
|---------------|----------------------------------------------|------------------------------|--------------|--------------|-------------|-------|
| 196 bits(499) | 2e-87                                        | Compositional matrix adjust. | 102/164(62%) | 107/164(65%) | 51/164(31%) | +1    |
| Query 93      | RFQGGVLVLCVKVFPFQFGLYLSSYILTATAIDRYHAI       | CHPLSYCSVTSRKS               | SRIMVYCAW    | 152          |             |       |
| Sbjct 2381887 | RFQGGVLVLCVKVFPFQFGLYLSSYILTATAIDRYHAI       | CHPLSYCSVTSRKS               | SRIMVYCAW    | 2382066      |             |       |
| Query 153     | SFALILCIP-----                               |                              | 161          |              |             |       |
| Sbjct 2382067 | S ALILCIP                                    |                              |              |              |             |       |
| Query 162     | QLFVFSYQEVMPRIWDCWATFDIKFGEKAYVTWYSLMVFLPF   |                              | 205          |              |             |       |
| Sbjct 2382247 | QLFVFSYQEVMP+LWDCWATFDIKFGE+AYVTW ++ LL F+   |                              |              |              |             |       |
| Sbjct 2382247 | QLFVFSYQEVMPK1WDCWATFDIKFGERAYVTW*AIFRLLLSFL |                              | 2382378      |              |             |       |

Range 2: 2381495 to 2381782 [GenBankGraphics](#)

Alignment statistics for match #2

| Score         | Expect                                        | Method                       | Identities | Positives  | Gaps     | Frame |
|---------------|-----------------------------------------------|------------------------------|------------|------------|----------|-------|
| 147 bits(372) | 2e-87                                         | Compositional matrix adjust. | 89/96(93%) | 90/96(93%) | 2/96(2%) | +2    |
| Query 1       | MNETTNSSTAAAN--EEEDIRDENLAKWEIVLLANILIFTIFGNS | slvllslylrry                 | AHK        | 58         |          |       |
| Sbjct 2381495 | MNETTNSST N EEED RDE LAKWEIVLLANILIFTIFGNS    | slvllslylrry                 | AHK        | 2381674    |          |       |
| Query 59      | KLSRMVFFIMNLSIADLLTGLLDVLPQLAWDITFRF          |                              | 94         |            |          |       |
| Sbjct 2381675 | KLSRMVFFIMNLSIADLLTGLLDVLPQLAWDITFR+          |                              |            |            |          |       |
| Sbjct 2381675 | KLSRMVFFIMNLSIADLLTGLLDVLPQLAWDITFRY          |                              | 2381782    |            |          |       |

Range 3: 2382545 to 2383084 [GenBankGraphics](#)

Alignment statistics for match #3

| Score         | Expect                                     | Method                       | Identities   | Positives    | Gaps        | Frame |
|---------------|--------------------------------------------|------------------------------|--------------|--------------|-------------|-------|
| 236 bits(603) | 1e-68                                      | Compositional matrix adjust. | 135/180(75%) | 146/180(81%) | 28/180(15%) | +2    |
| Query 195     | YSLMVFLPFIVLVYTYVVICVGVWQSNKMSGAVDDRTY     | irsisnysrnrss                | fiskAMIN     | 254          |             |       |
| Sbjct 2382545 | YSLMVFLPFIVLVYTYVVICVGVW+SNKMSG +DD+ Y     | IRSISNYSRNR                  | S+FISKAMIN   | 2382724      |             |       |
| Query 255     | TVKQTIATIVITLYAITSIPFIGCELWISWDPEAPKSSFFAN |                              | 293          |              |             |       |
| Sbjct 2382725 | TVKQTIATIVITLYA+TSIPFIGCELW++WD EA K+SFAN  |                              |              |              |             |       |
| Query 294     | -----GPAFTILALLNSLTSCVNPWYLSFNRELRQTL      | MNYFCN                       | NEHSQKYYG    | 346          |             |       |
| Sbjct 2382905 | FFVSPFSGPAFTILALLNSLTSCVNPWYLSFNRELRQTL    | MNYFCN                       | NEHSQKYYG    | 2383084      |             |       |

Range 4: 2383149 to 2383253 [GenBankGraphics](#)

Alignment statistics for match #4

| Score         | Expect                              | Method                       | Identities | Positives  | Gaps     | Frame |
|---------------|-------------------------------------|------------------------------|------------|------------|----------|-------|
| 40.0 bits(92) | 0.016                               | Compositional matrix adjust. | 32/35(91%) | 33/35(94%) | 0/35(0%) | +3    |
| Query 340     | YYGQRMRRSDSNDTSTRSLMSRISRYTSSIIIPR  |                              | 374        |            |          |       |
| Sbjct 2383149 | + GQRMRRSDSNDTSTR SLMSRISRYTSSIIIPR |                              |            |            |          |       |
| Sbjct 2383149 | FTGQRMRRSDSNDTSTRISLMSRISRYTSSIIIPR |                              | 2383253    |            |          |       |

**Lasius niger** Lnig\_2.1\_21704, whole genome shotgun sequence

Sequence ID: [gb|LBM01020432.1](#)|Length: 1899

Number of Matches: 2

Range 1: 1398 to 1694 [GenBankGraphics](#)

Query: *Monomorium pharaonis* gi|826425402|ref|XP\_012527228.1|

Alignment statistics for match #1

| Score         | Expect                                  | Method                       | Identities  | Positives  | Gaps     | Frame |
|---------------|-----------------------------------------|------------------------------|-------------|------------|----------|-------|
| 162 bits(409) | 6e-44                                   | Compositional matrix adjust. | 73/99(74%)  | 89/99(89%) | 0/99(0%) | -2    |
| Query 196     | YSVTQFLIPFIVLYTYTKICVSIWTSNKISGIVDFKKG  | NKANFSQRNR                   | PLISKAMINT  | 255        |          |       |
| Sbjct 1694    | YS+ QFL+PFIVL+YTYTKIC++IWTS+K+SG+VD     | KK NKANFSQRNR                | +PLISKAM+NT |            |          |       |
| Sbjct 1694    | YSIMQFLLPFIVLYTYTKICIAIWTSSKMSGVVDL     | KNNKANFSQRNR                 | EPLISKAMNT  | 1515       |          |       |
| Query 256     | IKQMIVVVTLYIITNTPFIGCELWATWDPKASSPPFFTG |                              | 294         |            |          |       |
| Sbjct 1514    | ++Q I+V+TLYI T+ PFIG LWATWDPKA + PFFTG  |                              |             |            |          |       |
| Sbjct 1514    | VRQTIIVITLYIATSPFFIGSMLWATWDPKAFTLPFFTG |                              | 1398        |            |          |       |

Range 2: 938 to 1099 [GenBankGraphics](#)

Alignment statistics for match #2

| Score          | Expect                                | Method                       | Identities | Positives  | Gaps     | Frame |
|----------------|---------------------------------------|------------------------------|------------|------------|----------|-------|
| 88.2 bits(217) | 3e-18                                 | Compositional matrix adjust. | 45/55(82%) | 46/55(83%) | 1/55(1%) | -3    |
| Query 292      | FTGAAFTILSLNLSLTSCVNPWYFAPNKELRMALIN  | FLOGKDYSLTYGNHNS             | 346        |            |          |       |
| Sbjct 1099     | F GAAFTILSLNLSLTSCVNPWYFAPNKELR AL NF | KD SL YGNH+ S                |            |            |          |       |
| Sbjct 1099     | FAGAAFTILSLNLSLTSCVNPWYFAPNKELRGAL    | TNFPYRKKD-SLNYGNHDS          | 938        |            |          |       |

**Lasius niger** Lnig\_2.1\_5428, whole genome shotgun sequence

Sequence ID: [gb|LBM01005371.1](#)|Length: 12101

Number of Matches: 3

Range 1: 11103 to 11315 [GenBankGraphics](#)

Query: Monomorium\_pharaonis gi|826425402|ref|XP\_012527228.1|

Alignment statistics for match #1

| Score         | Expect                                                        | Method                       | Identities | Positives  | Gaps     | Frame |
|---------------|---------------------------------------------------------------|------------------------------|------------|------------|----------|-------|
| 135 bits(340) | 4e-34                                                         | Compositional matrix adjust. | 60/71(85%) | 66/71(92%) | 0/71(0%) | +3    |
| Query 94      | RFQGGAVLCKLIKFGQPFGLYLSSYILTVTAFDRYYAICHPPFSYCGVTSQRSKMMVYGAW |                              | 153        |            |          |       |
|               | RFQGGAVLCKLIKFGQPFGLYLSSY+LTVTA DRYAICHPPF YC +TS+RSKMMVYGAW  |                              |            |            |          |       |
| Sbjct 11103   | RFQGGAVLCKLIKFGQPFGLYLSSYILTVTAMDRIYAICHPPFLYCSITSRRSKMMVYGAW |                              | 11282      |            |          |       |
| Query 154     | ALAVILCVPQI 164                                               |                              |            |            |          |       |
|               | LA ILCVPQ+                                                    |                              |            |            |          |       |
| Sbjct 11283   | TLAAILCVPQV 11315                                             |                              |            |            |          |       |

Range 2: 10003 to 10236 [GenBankGraphics](#)

Alignment statistics for match #2

| Score         | Expect                                                         | Method                       | Identities | Positives  | Gaps     | Frame |
|---------------|----------------------------------------------------------------|------------------------------|------------|------------|----------|-------|
| 114 bits(285) | 7e-27                                                          | Compositional matrix adjust. | 69/78(88%) | 73/78(93%) | 0/78(0%) | +1    |
| Query 17      | DDARDEYLARWEIAVLTSIFLLTVIGNILvllalalyvrrryqrrKFTRMYFFILHLSVADL |                              | 76         |            |          |       |
|               | DD RDEYLARWEIAVL T IFL+T+IGN L+L ALY RRRYQRRKFTRMYFFILHLS+ADL  |                              |            |            |          |       |
| Sbjct 10003   | DDTRDEYLARWEIAVLTIIFLVTLIGNTLILFALYARRRYQRRKFTRMYFFILHLSIADL   |                              | 10182      |            |          |       |
| Query 77      | LTGLLDVLPQLAWDITFR 94                                          |                              |            |            |          |       |
|               | LTGLLDVLPQLAWDITFR                                             |                              |            |            |          |       |
| Sbjct 10183   | LTGLLDVLPQLAWDITFR 10236                                       |                              |            |            |          |       |

Range 3: 11691 to 11780 [GenBankGraphics](#)

Alignment statistics for match #3

| Score          | Expect                               | Method                       | Identities | Positives  | Gaps     | Frame |
|----------------|--------------------------------------|------------------------------|------------|------------|----------|-------|
| 58.5 bits(140) | 2e-08                                | Compositional matrix adjust. | 23/30(77%) | 27/30(90%) | 0/30(0%) | +3    |
| Query 166      | IFSYMEIAPDIWECWATFYMPYGERAYITW 195   |                              |            |            |          |       |
|                | IFSY EI+P +WECWATFY+ YGERAY+TW       |                              |            |            |          |       |
| Sbjct 11691    | IFSYQEISPGVWECWATFYLYKGERAYVTW 11780 |                              |            |            |          |       |

**Cyphomyrmex costatus** contig19312, whole genome shotgun sequence

Sequence ID: [gb|LKE01019312.1](#)|Length: 44936

Number of Matches: 5

Range 1: 27566 to 27862 [GenBankGraphics](#)

Query: Monomorium\_pharaonis gi|826425402|ref|XP\_012527228.1|

Alignment statistics for match #1

| Score         | Expect                                                        | Method                       | Identities | Positives  | Gaps     | Frame |
|---------------|---------------------------------------------------------------|------------------------------|------------|------------|----------|-------|
| 171 bits(432) | 5e-54                                                         | Compositional matrix adjust. | 77/99(78%) | 90/99(90%) | 0/99(0%) | +2    |
| Query 196     | YSVTQFLIPFIVLYTYTKICVSIWTSNKISGIVDFKKGKANKANFSQRNRDPLISKAMINT |                              | 255        |            |          |       |
|               | YSV QFL+PFIVL+YTY +IC+SIW S+K+SG++D KK N ++ QRNRDPLISKAMINT   |                              |            |            |          |       |
| Sbjct 27566   | YSVMQFLLPFIVLVYTYMRICISIWKSSKLSGLIDHKKSNVSYCQRNRDPLISKAMINT   |                              | 27745      |            |          |       |
| Query 256     | IKQMIIVVVTLYIITNTPFIGCELWATWDPKASSSPFFTG 294                  |                              |            |            |          |       |
|               | +KQMI+VVTLYI TNTPFIGCELWATWDPKAS+SPFFTG                       |                              |            |            |          |       |
| Sbjct 27746   | VKQMIIVVVTLYIATNTPFIGCELWATWDPKASTSPFFTG 27862                |                              |            |            |          |       |

Range 2: 27379 to 27489 [GenBankGraphics](#)

Alignment statistics for match #2

| Score          | Expect                                      | Method                       | Identities | Positives  | Gaps     | Frame |
|----------------|---------------------------------------------|------------------------------|------------|------------|----------|-------|
| 59.7 bits(143) | 5e-54                                       | Compositional matrix adjust. | 27/37(73%) | 30/37(81%) | 1/37(2%) | +1    |
| Query 168      | SYMEIAPDIWECWATFYMPYGERAYITW-YSVTQFLI 203   |                              |            |            |          |       |
|                | SYMEI+P +WECWATFY+ YGERAYITW YS F I         |                              |            |            |          |       |
| Sbjct 27379    | SYMEISPGVWECWATFYLYKGERAYITW*YSFIYFFI 27489 |                              |            |            |          |       |

Range 3: 26537 to 26758 [GenBankGraphics](#)

Alignment statistics for match #3

| Score         | Expect                                                        | Method                       | Identities | Positives  | Gaps     | Frame |
|---------------|---------------------------------------------------------------|------------------------------|------------|------------|----------|-------|
| 134 bits(338) | 1e-33                                                         | Compositional matrix adjust. | 61/74(82%) | 68/74(91%) | 0/74(0%) | +2    |
| Query 91      | ITFRFQGGAVLCKLIKFGQPFGLYLSSYILTVTAFDRYYAICHPPFSYCGVTSQRSKMMVY |                              | 150        |            |          |       |
|               | + RFQGGAVLCKLIKFGQPFGLYLSSYILTVTA DRY+AIC+PFSYC +TS+RSKMMVY   |                              |            |            |          |       |
| Sbjct 26537   | MAVRPQGGAVLCKLIKFGQPFGLYLSSYILTVTAIDRYAICYPFSYCSITSRRSKMMVY   |                              | 26716      |            |          |       |
| Query 151     | GAWALAVILCVPQI 164                                            |                              |            |            |          |       |
|               | GAW LA +LCVPQ+                                                |                              |            |            |          |       |
| Sbjct 26717   | GAWTLAAMLCVPQV 26758                                          |                              |            |            |          |       |

Range 4: 23292 to 23573 [GenBankGraphics](#)

Alignment statistics for match #4

| Score         | Expect                                                         | Method                       | Identities | Positives  | Gaps     | Frame |
|---------------|----------------------------------------------------------------|------------------------------|------------|------------|----------|-------|
| 125 bits(315) | 1e-30                                                          | Compositional matrix adjust. | 80/94(85%) | 85/94(90%) | 0/94(0%) | +3    |
| Query 1       | MSRDNLNSSSPSEWPLDDARDEYLARWEIAVLTSIFLLTVIGNILvllalalyvrrryqrrK |                              | 60         |            |          |       |
|               | MS DLN SSS DDARDEYLARWEIAVLTSIFL+T+IGNIL+LLALYVRR YQ+RK        |                              |            |            |          |       |
| Sbjct 23292   | MSHDNLNSSSSSERPSSDDARDEYLARWEIAVLTSIFLITIIIGNILILLALYVRRCYQRRK |                              | 23471      |            |          |       |
| Query 61      | FTRMYFFILHLSVADLLTGLLDVLPQLAWDITFR 94                          |                              |            |            |          |       |
|               | FTRMYFFI+HLSVADLLTGLLDVLPQLAWDITFR                             |                              |            |            |          |       |
| Sbjct 23472   | FTRMYFFIMHLSVADLLTGLLDVLPQLAWDITFR 23573                       |                              |            |            |          |       |

Range 5: 28253 to 28411 [GenBankGraphics](#)

Alignment statistics for match #5

| Score          | Expect                                                | Method                       | Identities | Positives  | Gaps     | Frame |
|----------------|-------------------------------------------------------|------------------------------|------------|------------|----------|-------|
| 97.8 bits(242) | 3e-21                                                 | Compositional matrix adjust. | 46/53(87%) | 47/53(88%) | 0/53(0%) | +2    |
| Query 292      | FTGAAFTILSLNLSLTSCVNPWYFAPFNKELRMALINFLCGKKDYSLTYGNNH |                              | 344        |            |          |       |
|                | F GAAFTILSLNLSLTSC+NPWYFAPFNKELR AL F C KKDYSLTYGNNH  |                              |            |            |          |       |
| Sbjct 28253    | FAGAAFTILSLNLSLTSCINPWYFAPFNKELRAALTYFFCRKKDYSLTYGNNH |                              | 28411      |            |          |       |

**Atta colombica** contig24766, whole genome shotgun sequence  
Sequence ID: [gb|LKEW01024766.1](#) Length: 24004 Number of Matches: 4  
Related Information  
Range 1: 3747 to 4241 [GenBankGraphics](#)  
Query: Monomorium\_pharaonis gi|826425402|ref|XP\_012527228.1|

Alignment statistics for match #1

| Score         | Expect                                                         | Method                       | Identities   | Positives    | Gaps        | Frame |
|---------------|----------------------------------------------------------------|------------------------------|--------------|--------------|-------------|-------|
| 212 bits(539) | 5e-60                                                          | Compositional matrix adjust. | 102/165(62%) | 117/165(70%) | 38/165(23%) | -3    |
| Query 169     | YMEIAPDIWECWATFYMPYGERAYITW-----                               |                              | 195          |              |             |       |
|               | YMEI+P +WECWATFY+ YGERAYITW                                    |                              |              |              |             |       |
| Sbjct 4241    | YMEISPGVWECWATFYLYKYGERAYITW*YPFYIFSLKNILFLYNI TFNNINRFKCCEMS  |                              | 4062         |              |             |       |
| Query 196     | -----YSVTQFLPIFFIVLIYTYTKICVSIWTSNKISGIVDFKKGKGNKANSQRNRDPLISK |                              | 250          |              |             |       |
|               | YSV QFL+PFIIVL+YTYT+IC+SIW S+K+SG++D KK NK +F QRNRDPLISK       |                              |              |              |             |       |
| Sbjct 4061    | GFNRYYSVMQFLPFIIVLVYTYTRICISIWRSKSLGSLDLKSKNSVFCQRNRDPLISK     |                              | 3882         |              |             |       |
| Query 251     | AMINTIKQMIVVVTLIIITNTPFIGCELWATWDPKASSPFFTGA                   |                              | 295          |              |             |       |
|               | AMINT+KQMIVVV LYI+TNTPFIGCELWATWDPKAS+SPFFTG                   |                              |              |              |             |       |
| Sbjct 3881    | AMINTVKQMIVVVLIYIVTNTPFIGCELWATWDPKASTSPFFTGK                  |                              | 3747         |              |             |       |

Range 2: 4891 to 5103 [GenBankGraphics](#)

Alignment statistics for match #2

| Score         | Expect                                                         | Method                       | Identities | Positives  | Gaps     | Frame |
|---------------|----------------------------------------------------------------|------------------------------|------------|------------|----------|-------|
| 136 bits(343) | 5e-34                                                          | Compositional matrix adjust. | 62/71(87%) | 66/71(92%) | 0/71(0%) | -2    |
| Query 94      | RFQGGAVLCKLIKFGQPFGLYLYSSYILTVTAFDRYYAICHFPFSYCGVTSQRSKMMVYGAW |                              | 153        |            |          |       |
|               | RFQGGAVLCKLIKFGQPFGLYLYSSYILTVTA DRY+AICHFPFSYC VTS+RSKMMVYG W |                              |            |            |          |       |
| Sbjct 5103    | RFQGGAVLCKLIKFGQPFGLYLYSSYILTVTAIDRYHAICHFPFSYCVTSRRSKMMVYGTW  |                              | 4924       |            |          |       |
| Query 154     | ALAVILCVPOI 164                                                |                              |            |            |          |       |
|               | LA +LCVPQ+                                                     |                              |            |            |          |       |
| Sbjct 4923    | MLAAMLCVPQV 4891                                               |                              |            |            |          |       |

Range 3: 6822 to 7103 [GenBankGraphics](#)

Alignment statistics for match #3

| Score         | Expect                                                         | Method                       | Identities | Positives  | Gaps     | Frame |
|---------------|----------------------------------------------------------------|------------------------------|------------|------------|----------|-------|
| 125 bits(313) | 5e-30                                                          | Compositional matrix adjust. | 85/95(89%) | 89/95(93%) | 2/95(2%) | -3    |
| Query 1       | MSRDLNSSSSPSEWPLDD-ARDEYLARWEIAVLTSIFLLTVIGNILvllalalyvrrryqrr |                              | 59         |            |          |       |
|               | MS DLNSSSS SE PLDD ARDEYLARWEIAVLTSIFL+T+IGN+LVLLALY RRRYQRR   |                              |            |            |          |       |
| Sbjct 7103    | MSHDLNSSSS-SEPLDDDDARDEYLARWEIAVLTSIFLITIIIGNVLVLLALYARRRYQRR  |                              | 6927       |            |          |       |
| Query 60      | KFTRMYFFILHLSVADLLTGLLDVLPQLAWDITFR 94                         |                              |            |            |          |       |
|               | KFTRMYFFI+HLSVADLLTGL DVLPQLAWDITFR                            |                              |            |            |          |       |
| Sbjct 6926    | KFTRMYFFIMHLSVADLLTGLFDVLPQLAWDITFR 6822                       |                              |            |            |          |       |

Range 4: 3235 to 3387 [GenBankGraphics](#)

Alignment statistics for match #4

| Score          | Expect                                              | Method                       | Identities | Positives  | Gaps     | Frame |
|----------------|-----------------------------------------------------|------------------------------|------------|------------|----------|-------|
| 96.7 bits(239) | 2e-20                                               | Compositional matrix adjust. | 46/51(90%) | 47/51(92%) | 0/51(0%) | -2    |
| Query 294      | GAAFTILSLNLSLTSCVNPWYFAPFNKELRMALINFLCGKKDYSLTYGNNH |                              | 344        |            |          |       |
|                | GAAFTILSLNLSLTSCVNPWYFAPFNKELR+AL F C KKDYSLTYGNNH  |                              |            |            |          |       |
| Sbjct 3387     | GAAFTILSLNLSLTSCVNPWYFAPFNKELRVALTCFFCRKKDYSLTYGNNH |                              | 3235       |            |          |       |

**Linepithema humile** ctg7180000726062, whole genome shotgun sequence  
Sequence ID: [gb|ADQO01003105.1](#) Length: 22838  
Number of Matches: 5  
Range 1: 12037 to 12333 [GenBankGraphics](#)  
Query: Monomorium\_pharaonis gi|826425402|ref|XP\_012527228.1|

Alignment statistics for match #1

| Score         | Expect                                                         | Method                       | Identities | Positives  | Gaps     | Frame |
|---------------|----------------------------------------------------------------|------------------------------|------------|------------|----------|-------|
| 173 bits(439) | 1e-54                                                          | Compositional matrix adjust. | 79/99(80%) | 92/99(92%) | 0/99(0%) | +1    |
| Query 196     | YSVTQFLPIFFIVLIYTYTKICVSIWTSNKISGIVDFKKGKGNKANSQRNRDPLISKAMINT |                              | 255        |            |          |       |
|               | YSVTQFL+PFIIVL+YTYT+IC+SIWTSN +SG+V FKK +KA+F+ RNRDP ISKA+INT  |                              |            |            |          |       |
| Sbjct 12037   | YSVTQFLPFIIVLVYTYTRICISIWTSNMTMSGVGVGFKKSDKASFHRNRDPFISKALINT  |                              | 12216      |            |          |       |
| Query 256     | IKQMIVVVTLIIITNTPFIGCELWATWDPKASSPFFTGA 294                    |                              |            |            |          |       |
|               | +KQ IVVVTLIIITN PFIGCELWATWDPKAS+SPFFT+G                       |                              |            |            |          |       |
| Sbjct 12217   | VKQTIIVVTLIIITNIPFIGCELWATWDPKASTSPFFSG 12333                  |                              |            |            |          |       |

Range 2: 11847 to 11957 [GenBankGraphics](#)

Alignment statistics for match #2

| Score          | Expect                                       | Method                       | Identities | Positives  | Gaps     | Frame |
|----------------|----------------------------------------------|------------------------------|------------|------------|----------|-------|
| 59.3 bits(142) | 1e-54                                        | Compositional matrix adjust. | 26/37(70%) | 31/37(83%) | 2/37(5%) | +3    |
| Query 161      | VPQ--IFIFSMEIAPDIWECWATFYMPYGERAYITW 195     |                              |            |            |          |       |
|                | VP+ +FIFSY EI+P +WECWATFY+ YGE AYITW         |                              |            |            |          |       |
| Sbjct 11847    | VPKL*VFIFSYPEISPGVWECWATFYLYKYGAAAYITW 11957 |                              |            |            |          |       |

Range 3: 11290 to 11502 [GenBankGraphics](#)

Alignment statistics for match #3

| Score         | Expect                                                        | Method                       | Identities | Positives  | Gaps     | Frame |
|---------------|---------------------------------------------------------------|------------------------------|------------|------------|----------|-------|
| 135 bits(339) | 5e-34                                                         | Compositional matrix adjust. | 61/71(86%) | 65/71(91%) | 0/71(0%) | +1    |
| Query 94      | RFQGGAVLCKLIKFGQPFGLYLSSYILTVTAFDRYYAICHPPFSYCGVTSQRSKMMVYGAW |                              | 153        |            |          |       |
| Sbjct 11290   | RFQGGAILCKLIKFGQPFGLYLSSYILTVTALDRYYAICHPPFSYCVTSRRSKMMVFAAW  |                              | 11469      |            |          |       |
| Query 154     | ALAVILCVPQI 164                                               |                              |            |            |          |       |
| Sbjct 11470   | AFAAILCVPQV 11502                                             |                              |            |            |          |       |

Range 4: 10330 to 10563 [GenBankGraphics](#)

Alignment statistics for match #4

| Score         | Expect                                                         | Method                   | Identities | Positives  | Gaps     | Frame |
|---------------|----------------------------------------------------------------|--------------------------|------------|------------|----------|-------|
| 121 bits(303) | 3e-29                                                          | Composition-based stats. | 69/78(88%) | 75/78(96%) | 0/78(0%) | +1    |
| Query 17      | DDARDEYLARWEIAVLTISIFLLTVIGNIILVllalyvrrryqrKFTRMYYF ILHLSVADL |                          | 76         |            |          |       |
| Sbjct 10330   | DDARDEYLARWEIAVLTISIFL+T+IGN+++L ALY RRRYQRRKFTRMYYF ILHLS+ADL |                          | 10509      |            |          |       |
| Query 77      | LTGLLDVLPQLAWDITFR 94                                          |                          |            |            |          |       |
| Sbjct 10510   | LTGLFDVLPQLAWDITFR 10563                                       |                          |            |            |          |       |

Range 5: 12585 to 12746 [GenBankGraphics](#)

Alignment statistics for match #5

| Score          | Expect                                               | Method                       | Identities | Positives  | Gaps     | Frame |
|----------------|------------------------------------------------------|------------------------------|------------|------------|----------|-------|
| 92.4 bits(228) | 2e-19                                                | Compositional matrix adjust. | 45/54(83%) | 45/54(83%) | 0/54(0%) | +3    |
| Query 292      | FTGAFTILSLNLSLTCVNPWIYFAPNKELRMALINFLCGKDKDYSLTNGNHN |                              | 345        |            |          |       |
| Sbjct 12585    | FPGALFTILSLNLSLTCVNPWIYFAPNKELRALTNFFCRKDKDYSLTNGNRT |                              | 12746      |            |          |       |

**Camponotus floridanus** CamFlo\_1.0\_4.contig5511, whole genome shotgun sequence

Sequence ID: [gb|AEAB01029474.1|](#)Length: 1857

Number of Matches: 2

Range 1: 520 to 816 [GenBankGraphics](#)

Query: Monomorium\_pharaonis gi|826425402|ref|XP\_012527228.1|

Alignment statistics for match #1

| Score         | Expect                                                      | Method                       | Identities | Positives  | Gaps     | Frame |
|---------------|-------------------------------------------------------------|------------------------------|------------|------------|----------|-------|
| 159 bits(403) | 4e-43                                                       | Compositional matrix adjust. | 69/99(70%) | 88/99(88%) | 0/99(0%) | -1    |
| Query 196     | YSVTQFLPFIIVLYTYTKICVSIWTSNKISGIVDFKKNKANFSQRNRDPLISKAMINT  |                              | 255        |            |          |       |
| Sbjct 816     | YS+ QFL+PFIVL+YTY IC++IW SNK+SG++D KK NK NFSQ+NR+P +SKAM+NT |                              | 637        |            |          |       |
| Query 256     | IKQIMVVVTLIIITNTPFIGCELWATWDPKASSPFFTG 294                  |                              |            |            |          |       |
| Sbjct 636     | +Q I+V+TLYI+T++PFIGCELWATWDPKA S PFFTG                      |                              | 520        |            |          |       |

Range 2: 88 to 240 [GenBankGraphics](#)

Alignment statistics for match #2

| Score          | Expect                                              | Method                       | Identities | Positives  | Gaps     | Frame |
|----------------|-----------------------------------------------------|------------------------------|------------|------------|----------|-------|
| 84.0 bits(206) | 8e-17                                               | Compositional matrix adjust. | 39/51(76%) | 44/51(86%) | 0/51(0%) | -1    |
| Query 294      | GAAPTILSLNLSLTCVNPWIYFAPNKELRMALINFLCGKDKDYSLTNGNHN |                              | 344        |            |          |       |
| Sbjct 240      | GAAPTILSLNLSLTCVNPWIYFAPNK+LR AL F +K++SL YGNH+     |                              | 88         |            |          |       |

**Camponotus floridanus** CamFlo\_1.0\_4.contig5512, whole genome shotgun sequence

Sequence ID: [gb|AEAB01029475.1|](#)Length: 4331

Number of Matches: 3

Range 1: 1496 to 1714 [GenBankGraphics](#)

Query: Monomorium\_pharaonis gi|826425402|ref|XP\_012527228.1|

Alignment statistics for match #1

| Score         | Expect                                                       | Method                       | Identities | Positives  | Gaps     | Frame |
|---------------|--------------------------------------------------------------|------------------------------|------------|------------|----------|-------|
| 130 bits(327) | 2e-32                                                        | Compositional matrix adjust. | 60/73(82%) | 64/73(87%) | 0/73(0%) | -2    |
| Query 92      | TFRQGGAVLCKLIKFGQPFGLYLSSYILTVTAFDRYYAICHPPFSYCGVTSQRSKMMVYG |                              | 151        |            |          |       |
| Sbjct 1714    | T RFQGGAVLCKLIKFGQPFGLYLSSY+LTVTA DRY AICHPPFSYC TS+RSK+MVYG |                              | 1535       |            |          |       |
| Query 152     | AWALAVILCVPQI 164                                            |                              |            |            |          |       |
| Sbjct 1534    | AWFAAILCVPQV 1496                                            |                              |            |            |          |       |

Range 2: 2836 to 3159 [GenBankGraphics](#) [Next Match](#) [Previous Match](#) [First Match](#)

Alignment statistics for match #2

| Score         | Expect                                                        | Method                       | Identities  | Positives   | Gaps       | Frame |
|---------------|---------------------------------------------------------------|------------------------------|-------------|-------------|------------|-------|
| 119 bits(298) | 1e-28                                                         | Compositional matrix adjust. | 77/108(71%) | 87/108(80%) | 10/108(9%) | -3    |
| Query 8       | SSSPSEWPLDDARDEYLARWEIAVLTISIFLLTVIGNIILVllalyvrrryqrKFTRMYYF |                              | 67          |             |            |       |
| Sbjct 3159    | S SPS D+ RDEYLARWEIA+LTSIFL+T+IGN L+L ALYVRRRYQR+KFTRMYYF     |                              | 2980        |             |            |       |
| Query 68      | ILHLSVADLLTGLLDVLPQLAWDITFR----FQG----GAVLCKLI 105            |                              |             |             |            |       |
| Sbjct 2979    | ILHLSVADLLTGLLDVLPQLAWDITFR FQ ++C+L+                         |                              | 2836        |             |            |       |

Range 3: 1016 to 1099 [GenBankGraphics](#)

Alignment statistics for match #3

| Score          | Expect                       | Method                       | Identities | Positives  | Gaps     | Frame |
|----------------|------------------------------|------------------------------|------------|------------|----------|-------|
| 51.2 bits(121) | 4e-06                        | Compositional matrix adjust. | 19/28(68%) | 24/28(85%) | 0/28(0%) | -2    |
| Query 168      | SYMEIAPDIWECWATFYMPYGERAYITW | 195                          |            |            |          |       |
|                | SY EI+PD+W+CWATF + YGER Y+TW |                              |            |            |          |       |
| Sbjct 1099     | SYEISPDVWDCWATFNLYKGERVYVITW | 1016                         |            |            |          |       |

**Trachymyrmex septentrionalis** contig23603, whole genome shotgun sequence

Sequence ID: [gb|LKEZ01023603.1](#) Length: 6298

Number of Matches: 4

Range 1: 5221 to 5724 [GenBankGraphics](#)

Query: Monomorium\_pharaonis gi|826425402|ref|XP\_012527228.1|

Alignment statistics for match #1

| Score         | Expect                                                       | Method                       | Identities   | Positives    | Gaps        | Frame |
|---------------|--------------------------------------------------------------|------------------------------|--------------|--------------|-------------|-------|
| 222 bits(565) | 2e-63                                                        | Compositional matrix adjust. | 107/168(64%) | 122/168(72%) | 37/168(22%) | +1    |
| Query 164     | IFIFSYMEIAPDIWECWATFYMPYGERAYITW-----                        | 195                          |              |              |             |       |
|               | IFIFSYMEI+P +WECWATFY+ YGERAYITW                             |                              |              |              |             |       |
| Sbjct 5221    | IFIFSYMEISPGVWECWATFYLYKGERAYITW*DLFIYFFIQKYLIFIT*HLITLIRFKC | 5400                         |              |              |             |       |
| Query 196     | -----YSVTQFLIPFIVLYTYTKICVSIWTSNKISGIVDFKKGKANKFSQRNRDP      | 246                          |              |              |             |       |
|               | YSV QFL+PFIVL+YTYT+IC+SIW S K+SG++D K+ NK +F QRNRDP          |                              |              |              |             |       |
| Sbjct 5401    | CKMSGFNRYRSMQFLPPFIVLVYTYTRICISIWRSKLSGLIDLKRSNKVSPFCQRNRDP  | 5580                         |              |              |             |       |
| Query 247     | LISKAMINTIKQMIWVVTLYIITNTPFIGCELWATWDPKASSPFFTG              | 294                          |              |              |             |       |
|               | LISKAMINT+KQMIWVVTLYI+TNTNTPFIGCELWATWDPKAS+SPFFTG           |                              |              |              |             |       |
| Sbjct 5581    | LISKAMINTVKQMIWVVTLYIVTNTNTPFIGCELWATWDPKASTSPFFTG           | 5724                         |              |              |             |       |

Range 2: 4405 to 4617 [GenBankGraphics](#)

Alignment statistics for match #2

| Score         | Expect                                                        | Method                       | Identities | Positives  | Gaps     | Frame |
|---------------|---------------------------------------------------------------|------------------------------|------------|------------|----------|-------|
| 137 bits(345) | 4e-34                                                         | Compositional matrix adjust. | 62/71(87%) | 66/71(92%) | 0/71(0%) | +1    |
| Query 94      | RFQGGAVLCKLIKFGQPFGLYLSSYILTVTAFDRYYAICHPPFSYCGVTSQRSKMMVYGAW | 153                          |            |            |          |       |
|               | RFQGGAVLCKLIKFGQPFGLYLSSYILTVTA DRY+AICHPPFSYC VTS+RSKMMVYG W |                              |            |            |          |       |
| Sbjct 4405    | RFQGGAVLCKLIKFGQPFGLYLSSYILTVTAIDRYHAICHPPFSYCVTSRRSKMMVYGTW  | 4584                         |            |            |          |       |
| Query 154     | ALAVILCVPOI                                                   | 164                          |            |            |          |       |
|               | LA +LCVPO+                                                    |                              |            |            |          |       |
| Sbjct 4585    | TAAAMLCVPOV                                                   | 4617                         |            |            |          |       |

Range 3: 2497 to 2769 [GenBankGraphics](#)

Alignment statistics for match #3

| Score         | Expect                                                       | Method                       | Identities | Positives  | Gaps     | Frame |
|---------------|--------------------------------------------------------------|------------------------------|------------|------------|----------|-------|
| 131 bits(330) | 4e-32                                                        | Compositional matrix adjust. | 82/92(89%) | 87/92(94%) | 2/92(2%) | +1    |
| Query 4       | DLNSSSSPSEWPLDD-ARDEYLARWEIAVLTSIFLLTVIGNIvlilalyvrrryqrrKFT | 62                           |            |            |          |       |
|               | DLNSSSS SE PLDD ARDEYLARWEIAVLTSIFL+T+GN+LVLALY RRRYQRRKFT   |                              |            |            |          |       |
| Sbjct 2497    | DLNSSSS-SELPLDDARDEYLARWEIAVLTSIFLITIVGNVLLALYARRRYQRRKFT    | 2673                         |            |            |          |       |
| Query 63      | RMYYFHLHLSVADLLTGLDVLPLQAWDITFR                              | 94                           |            |            |          |       |
|               | RMYYFI+HLSVADLLTGL DVLPLQAWDITFR                             |                              |            |            |          |       |
| Sbjct 2674    | RMYYFIMHLSVADLLTGLPDVLPQLAWDITFR                             | 2769                         |            |            |          |       |

Range 4: 6089 to 6241 [GenBankGraphics](#)

Alignment statistics for match #4

| Score          | Expect                                            | Method                       | Identities | Positives  | Gaps     | Frame |
|----------------|---------------------------------------------------|------------------------------|------------|------------|----------|-------|
| 96.7 bits(239) | 3e-20                                             | Compositional matrix adjust. | 46/51(90%) | 47/51(92%) | 0/51(0%) | +2    |
| Query 294      | GAAFTILSLNLSLTCVNPWIYFAPNKLRLMALINFLCGKDYSLTYGNHN | 344                          |            |            |          |       |
|                | GAAFTILSLNLSLTCVNPWIYFAPNKLRL+AL F C KKDYSLTYGNHN |                              |            |            |          |       |
| Sbjct 6089     | GAAFTILSLNLSLTCVNPWIYFAPNKLRLVALTCFFCRKDYSLTYGNHN | 6241                         |            |            |          |       |

**Trachymyrmex zeteki** contig15596, whole genome shotgun sequence

Sequence ID: [gb|LKFA01015596.1](#) Length: 111526

Number of Matches: 5

Range 1: 16865 to 17161 [GenBankGraphics](#)

Query: Monomorium\_pharaonis gi|826425402|ref|XP\_012527228.1|

Alignment statistics for match #1

| Score         | Expect                                                       | Method                       | Identities | Positives  | Gaps     | Frame |
|---------------|--------------------------------------------------------------|------------------------------|------------|------------|----------|-------|
| 175 bits(443) | 3e-54                                                        | Compositional matrix adjust. | 78/99(79%) | 91/99(91%) | 0/99(0%) | -1    |
| Query 196     | YSVTQFLIPFIVLYTYTKICVSIWTSNKISGIVDFKKGKANKFSQRNRDPLISKAMINT  | 255                          |            |            |          |       |
|               | YSV QFL+PFIVL+YTYT+IC+SIW S+K+SG++D K+ NK +F QRNRDPLISKAMINT |                              |            |            |          |       |
| Sbjct 17161   | YSVMQFLPPFIVLVYTYTRICISIWRSKLSGLIDLKRSNKVSPFCQRNRDPLISKAMINT | 16982                        |            |            |          |       |
| Query 256     | IKQMIWVVTLYIITNTPFIGCELWATWDPKASSPFFTG                       | 294                          |            |            |          |       |
|               | +KQMIWVVTLYI+TN PFIGCELWATWDPKAS+SPFF G                      |                              |            |            |          |       |
| Sbjct 16981   | VKQMIWVVTLYIVTNIPTFIGCELWATWDPKASNSPFFAG                     | 16865                        |            |            |          |       |

Range 2: 17257 to 17337 [GenBankGraphics](#)

Alignment statistics for match #2

| Score          | Expect                      | Method                       | Identities | Positives  | Gaps     | Frame |
|----------------|-----------------------------|------------------------------|------------|------------|----------|-------|
| 57.8 bits(138) | 3e-54                       | Compositional matrix adjust. | 22/27(81%) | 25/27(92%) | 0/27(0%) | -2    |
| Query 169      | YMEIAPDIWECWATFYMPYGERAYITW | 195                          |            |            |          |       |
|                | YMEI+P +WECWATFY+ YGERAYITW |                              |            |            |          |       |
| Sbjct 17337    | YMEISPGVWECWATFYLYKGERAYITW | 17257                        |            |            |          |       |

Range 3: 17954 to 18166[GenBankGraphics](#)

Alignment statistics for match #3

| Score         | Expect                                                       | Method                       | Identities | Positives  | Gaps     | Frame |
|---------------|--------------------------------------------------------------|------------------------------|------------|------------|----------|-------|
| 138 bits(348) | 2e-34                                                        | Compositional matrix adjust. | 63/71(89%) | 67/71(94%) | 0/71(0%) | -1    |
| Query 94      | RFQGGAVLCKLIKFGQPFGLYLSSYILTVTAFDRYYAICHPPFSYCVTSQRSKMMVYGAW |                              | 153        |            |          |       |
| Sbjct 18166   | RFQGGAVLCKLIKFGQPFGLYLSSYILTVTADRY+AICHPPFSYC VTS+RSKMMVYGAW |                              | 17987      |            |          |       |
| Query 154     | ALAVILCVPQI 164                                              |                              |            |            |          |       |
| Sbjct 17986   | LA +LCVPQ+<br>TLAAMLCVPQV 17954                              |                              |            |            |          |       |

Range 4: 19839 to 20126[GenBankGraphics](#)

Alignment statistics for match #4

| Score         | Expect                                                                           | Method                       | Identities | Positives  | Gaps     | Frame |
|---------------|----------------------------------------------------------------------------------|------------------------------|------------|------------|----------|-------|
| 123 bits(308) | 3e-29                                                                            | Compositional matrix adjust. | 83/96(86%) | 88/96(91%) | 2/96(2%) | -3    |
| Query 1       | MSRDLNSSSSPSEWPLDD-ARDEYLARWEIAVLTSIFLLTVIGNIlvllalyvrrryqrr                     |                              | 58         |            |          |       |
| Sbjct 20126   | MS DLNSSSS E PLDD ARDE+LARWEIAVLTSIFL+T+IGN+LVLLALY RRRYQRR                      |                              | 19947      |            |          |       |
| Query 59      | rKFRMYFFIHLHLSVADLLTGLLDVLPQLAWDITFR 94                                          |                              |            |            |          |       |
| Sbjct 19946   | RKFRMYFFI+HLSVADLLTGL DVLPQLAWDITFR<br>RKFRMYFFIMHLSVADLLTGLFDVLPQLAWDITFR 19839 |                              |            |            |          |       |

Range 5: 16354 to 16515[GenBankGraphics](#)

Alignment statistics for match #5

| Score         | Expect                                                  | Method                       | Identities | Positives  | Gaps     | Frame |
|---------------|---------------------------------------------------------|------------------------------|------------|------------|----------|-------|
| 100 bits(249) | 2e-21                                                   | Compositional matrix adjust. | 48/54(89%) | 49/54(90%) | 0/54(0%) | -2    |
| Query 294     | GAAFTILSLNLSLTSCVNPWIYFAFNKELRMALINFLCGKDKDYSLTYGNNHNSL |                              | 347        |            |          |       |
| Sbjct 16515   | GAAFTILSLNLSLTSCVNPWIYFAFNKELR AL +F C KKDYSLTYGNNH NSL |                              | 16354      |            |          |       |

**Trachymyrmex cornetzi** contig27754, whole genome shotgun sequence

Sequence ID: [gb|LKEY01027754.1](#)|Length: 9614

Number of Matches: 5

Range 1: 8717 to 9013[GenBankGraphics](#)

Query: Monomorium\_pharaonis gi|826425402|ref|XP\_012527228.1|

Alignment statistics for match #1

| Score         | Expect                                                                                      | Method                       | Identities | Positives  | Gaps     | Frame |
|---------------|---------------------------------------------------------------------------------------------|------------------------------|------------|------------|----------|-------|
| 180 bits(456) | 9e-49                                                                                       | Compositional matrix adjust. | 81/99(82%) | 93/99(93%) | 0/99(0%) | +2    |
| Query 196     | YSVTQFLPFIVLIVTYTYTKICVSIWTSNKISGIVDFKKNKANFSQRNRDPLISKAMINT                                |                              | 255        |            |          |       |
| Sbjct 8717    | YSV QEL+PFIVL+YTYT+IC+SIW SNK+SG+D K+ NK +F QRNRDPLISKAMINT                                 |                              | 8896       |            |          |       |
| Query 256     | IKQMIVVVTLYIITNTPFIGELWATWDPKASSPFFFTG 294                                                  |                              |            |            |          |       |
| Sbjct 8897    | +KQMIVVVTLYI+TNTNTPFIGELWATWDPKAS+SPFFFTG<br>VKQMIVVVTLYIVTNTNTPFIGELWATWDPKASTSPFFFTG 9013 |                              |            |            |          |       |

Range 2: 7686 to 7898[GenBankGraphics](#)

Alignment statistics for match #2

| Score         | Expect                                                       | Method                       | Identities | Positives  | Gaps     | Frame |
|---------------|--------------------------------------------------------------|------------------------------|------------|------------|----------|-------|
| 138 bits(348) | 2e-34                                                        | Compositional matrix adjust. | 63/71(89%) | 67/71(94%) | 0/71(0%) | +3    |
| Query 94      | RFQGGAVLCKLIKFGQPFGLYLSSYILTVTAFDRYYAICHPPFSYCVTSQRSKMMVYGAW |                              | 153        |            |          |       |
| Sbjct 7686    | RFQGGAVLCKLIKFGQPFGLYLSSYILTVTADRY+AICHPPFSYC VTS+RSKMMVYGAW |                              | 7865       |            |          |       |
| Query 154     | ALAVILCVPQI 164                                              |                              |            |            |          |       |
| Sbjct 7866    | LA +LCVPQ+<br>TLAAMLCVPQV 7898                               |                              |            |            |          |       |

Range 3: 5839 to 6120[GenBankGraphics](#)

Alignment statistics for match #3

| Score         | Expect                                                                        | Method                       | Identities | Positives  | Gaps     | Frame |
|---------------|-------------------------------------------------------------------------------|------------------------------|------------|------------|----------|-------|
| 126 bits(316) | 3e-30                                                                         | Compositional matrix adjust. | 85/95(89%) | 89/95(93%) | 2/95(2%) | +1    |
| Query 1       | MSRDLNSSSSPSEWPLDD-ARDEYLARWEIAVLTSIFLLTVIGNIlvllalyvrrryqrr                  |                              | 59         |            |          |       |
| Sbjct 5839    | MS DLNSSSS SE PLDD ARDEYLARWEIAVLTSIFL+T+IGN+LVLLALY RRRYQRR                  |                              | 6015       |            |          |       |
| Query 60      | KFRMYFFIHLHLSVADLLTGLLDVLPQLAWDITFR 94                                        |                              |            |            |          |       |
| Sbjct 6016    | KFRMYFFI+HLSVADLLTGL DVLPQLAWDITFR<br>KFRMYFFIMHLSVADLLTGLFDVLPQLAWDITFR 6120 |                              |            |            |          |       |

Range 4: 9426 to 9578[GenBankGraphics](#)

Alignment statistics for match #4

| Score          | Expect                                                  | Method                       | Identities | Positives  | Gaps     | Frame |
|----------------|---------------------------------------------------------|------------------------------|------------|------------|----------|-------|
| 94.0 bits(232) | 2e-19                                                   | Compositional matrix adjust. | 45/51(88%) | 47/51(92%) | 0/51(0%) | +3    |
| Query 294      | GAAFTILSLNLSLTSCVNPWIYFAFNKELRMALINFLCGKDKDYSLTYGNNHNSL |                              | 344        |            |          |       |
| Sbjct 9426     | GAAFTILSLNLSLTSCVNPWIYFAFNKELR+AL F C KKDYSLTYGNNHNSL   |                              | 9578       |            |          |       |



Range 5: 8524 to 8658 [GenBankGraphics](#) [Next Match](#) [Previous Match](#) [First Match](#)

Alignment statistics for match #5

| Score          | Expect                                          | Method                       | Identities | Positives  | Gaps     | Frame |
|----------------|-------------------------------------------------|------------------------------|------------|------------|----------|-------|
| 55.8 bits(133) | 5e-07                                           | Compositional matrix adjust. | 27/45(60%) | 32/45(71%) | 1/45(2%) | +1    |
| Query 169      | YMEIAPDIWECWATFYMPYGERAYITW-YSVTQFLPFIIVLIYTY   |                              | 212        |            |          |       |
|                | YMEI+P+WECWATFY+YGERAYITW Y F I ++ TY           |                              |            |            |          |       |
| Sbjct 8524     | YMEISPGVWECWATFYLYKYGERAYITW*YPFYIYFFIKKYLIFITY |                              | 8658       |            |          |       |

**Nasonia longicornis** strain IV7(U) Contig169224, whole genome shotgun sequence

Sequence ID: [gb|ADAP01169223.1|](#) Length: 6826

Number of Matches: 2

Range 1: 5931 to 6248 [GenBankGraphics](#)

Query: Monomorium\_pharaonis gi|826425402|ref|XP\_012527228.1|

Alignment statistics for match #1

| Score         | Expect                                                     | Method                       | Identities  | Positives   | Gaps      | Frame |
|---------------|------------------------------------------------------------|------------------------------|-------------|-------------|-----------|-------|
| 113 bits(282) | 4e-26                                                      | Compositional matrix adjust. | 53/106(50%) | 72/106(67%) | 0/106(0%) | -3    |
| Query 189     | ERAYITWYSVTQFLPFIIVLIYTYTKICVSIWTSNKISGIVDFKKNKANFQRNRDPLI |                              | 248         |             |           |       |
|               | +AY+YSVTFL+PFLV+TY+ICSIW+++R++LI                           |                              |             |             |           |       |
| Sbjct 6248    | DNAYLYRYSVTVFLPFCVLTFTYAEICCSIWRNRREVWVLAHERQALTKEGRSQTTLI |                              | 6069        |             |           |       |
| Query 249     | SKAMINTIKQMIWVVTLYIITNTPFIGELWATWDPKASSSPFFTG              |                              | 294         |             |           |       |
|               | SKAINT+KQ+VVTLY++PF+GC+LWATWDPASSFFG                       |                              |             |             |           |       |
| Sbjct 6068    | SKAKINTVKQTLAVVTLYAASSIPFVGCQLWATWDPFASSAFFDG              |                              | 5931        |             |           |       |

Range 2: 5200 to 5367 [GenBankGraphics](#)

Alignment statistics for match #2

| Score          | Expect                                                    | Method                       | Identities | Positives  | Gaps     | Frame |
|----------------|-----------------------------------------------------------|------------------------------|------------|------------|----------|-------|
| 44.3 bits(103) | 0.002                                                     | Compositional matrix adjust. | 31/56(55%) | 37/56(66%) | 2/56(3%) | -2    |
| Query 291      | FFTGAFTILSLLSLTSCVNPWIYFAPNKELRMALINFLCG--KKDYSLTYGNNH    |                              | 344        |            |          |       |
|                | F G FTILSLL+SLTSCVNPWIY F+ELR AL FL K+D + +G +            |                              |            |            |          |       |
| Sbjct 5367     | FLLGPIFTILSLLSLTSCVNPWYLYLTFYSYELRAALTKFLRSLIKRDRTSRFGKYQ |                              | 5200       |            |          |       |

**Nasonia longicornis** strain IV7(U) Contig169231, whole genome shotgun sequence

Sequence ID: [gb|ADAP01169230.1|](#) Length: 1848

Number of Matches: 1

Range 1: 602 to 919 [GenBankGraphics](#)

Query: Monomorium\_pharaonis gi|826425402|ref|XP\_012527228.1|

Alignment statistics for match #1

| Score          | Expect                                                       | Method                       | Identities  | Positives   | Gaps      | Frame |
|----------------|--------------------------------------------------------------|------------------------------|-------------|-------------|-----------|-------|
| 89.7 bits(221) | 2e-18                                                        | Compositional matrix adjust. | 57/107(53%) | 80/107(74%) | 2/107(1%) | -3    |
| Query 6        | NSSSPSEWLPDDARDEYLARWEIAVLTSIFLLTVIGNIvl1alalyvrr-ryqrrKFTRM |                              | 64          |             |           |       |
|                | S++S P+D RDE LA WE+ VL I T++GN+LVL A+Y++R R R++ TRM          |                              |             |             |           |       |
| Sbjct 919      | ESATSMVAAPAEDEWDESLAVWEVIVLVLILTTLMGNVVLVFAIYLRKCRGRQRRLTRM  |                              | 740         |             |           |       |
| Query 65       | YFFILHLSVADLLTGLLDVLPQLAWDITFRFQGGAVLCKLIKFGQPF              |                              | 111         |             |           |       |
|                | +FF++HLSVADL+TGLL+VLPQLAWD+TFR+ L ++IKF + F                  |                              |             |             |           |       |
| Sbjct 739      | HFFVMHLSVADLITGLLNVLPQLAWDVTRVYVAHDL-QIIFKPKLF               |                              | 602         |             |           |       |

**Neodiprion lecontei** scaffold\_555, whole genome shotgun sequence

Sequence ID: [gb|LGI01000555.1|](#) Length: 122789

Number of Matches: 4

Range 1: 54570 to 55106 [GenBankGraphics](#)

Query: Polistes\_canadensis gi|954548184|ref|XP\_014616661.1|

Alignment statistics for match #1

| Score         | Expect                                                         | Method                       | Identities  | Positives   | Gaps        | Frame |
|---------------|----------------------------------------------------------------|------------------------------|-------------|-------------|-------------|-------|
| 108 bits(269) | 2e-24                                                          | Compositional matrix adjust. | 68/185(37%) | 93/185(50%) | 46/185(24%) | +3    |
| Query 195     | YSLMVFLLPFIIVLVVYTYGICVGVWQSNKMSGAVDDRAyirsisnysrnrresfisKAMIN |                              | 254         |             |             |       |
|               | YS+ +F+LP+VLVYTY IC VW + + G D + + + IS+A IN                   |                              |             |             |             |       |
| Sbjct 54570   | YSISIFILPPLVLVLYTYASICFAVWNTGIIGEAR-----TNGGPLRQRAIISRKIN      |                              | 54731       |             |             |       |
| Query 255     | TVKQTIATIVLYAITSIPFIGELWVSWDTKAFES-----                        |                              | 289         |             |             |       |
|               | ++KQ IAVI+ YA++S PFI LWV+WD A S                                |                              |             |             |             |       |
| Sbjct 54732   | SIKQMIAVISFYAVSSPFIASLLWVTWDRNAPTSYFDGTLYSKL*FHWFNKLYL*YQK     |                              | 54911       |             |             |       |
| Query 290     | -----SPANGPAFTILALLNSLTSCVNPWIYLSFNRELRLQTLMNIFYC---NRN        |                              | 334         |             |             |       |
|               | +F G AF IL L++SL SCVNPWIYL+ NREL + L++ C NR+                   |                              |             |             |             |       |
| Sbjct 54912   | VLRIASV*STNFIAGAAFAILTLMSSLNSCVNPWYLYLALNRELWRLALDRVCLRSRNRD   |                              | 55091       |             |             |       |
| Query 335     | EHSQK 339                                                      |                              |             |             |             |       |
|               | E +                                                            |                              |             |             |             |       |
| Sbjct 55092   | ETRKN 55106                                                    |                              |             |             |             |       |

Range 2: 53667 to 53882 [GenBankGraphics](#)

Alignment statistics for match #2

| Score         | Expect                                                       | Method                       | Identities | Positives  | Gaps     | Frame |
|---------------|--------------------------------------------------------------|------------------------------|------------|------------|----------|-------|
| 106 bits(265) | 7e-24                                                        | Compositional matrix adjust. | 49/72(68%) | 58/72(80%) | 0/72(0%) | +3    |
| Query 92      | FRFQGLVLCKLVKFPQFGLYSSYILTATAIDRYHAICHPLSYCVTSRQSRIMVYCA     |                              | 151        |            |          |       |
|               | +RFQGG +LCKLVKFP QP G Y SSYILTATA+DRY A+CHPL+Y S TSR+S+I V A |                              |            |            |          |       |
| Sbjct 53667   | YRFQGGPILCKLVKFGQPLGYPSSYILTATALDRYKAVCHPLAYSSTSRRSKITVCLA   |                              | 53846      |            |          |       |
| Query 152     | WSFALILCIPQL 163                                             |                              |            |            |          |       |
|               | WS +L CIPQ+                                                  |                              |            |            |          |       |
| Sbjct 53847   | WSLSLAFICIPQV 53882                                          |                              |            |            |          |       |

Range 3: 53329 to 53697 [GenBankGraphics](#)

Alignment statistics for match #3

| Score         | Expect                                                                                                                | Method                       | Identities  | Positives   | Gaps      | Frame |
|---------------|-----------------------------------------------------------------------------------------------------------------------|------------------------------|-------------|-------------|-----------|-------|
| 102 bits(253) | 2e-22                                                                                                                 | Compositional matrix adjust. | 59/130(45%) | 84/130(64%) | 8/130(6%) | +1    |
| Query 1       | MNETTNSFTVANEEKDTRDENLAKWEIVLLANILIFTIFGNSLVLLSLYLKRYRAHKK-<br>+N TT ++ N++ D RDE LA WEI LA + + + GNSLVLL++YLR Y A KK |                              | 59          |             |           |       |
| Sbjct 53329   | LNGTTENT---NKKDDPRDEYLAWEIATLAAMFLAALAGNSLVLLAIYLRGYDAPKKN                                                            |                              | 53496       |             |           |       |
| Query 60      | LSRMYFFIMNLSIADLLTGLLDVLPQLAWDITFRFQGGVLCKLVKFFQPFGLYLSSYIL<br>L+RM+ FL+LS+ADLLT +L+V PQLAW+ITFR+ + G YL+ +I+         |                              | 119         |             |           |       |
| Sbjct 53497   | LTRMHLFILHLSVADLLTALLNVFPQLAWELITFRYNN---INYTASIIHTTGFYLTRWIV                                                         |                              | 53667       |             |           |       |
| Query 120     | TATAIDRYHA 129<br>T + R+ A                                                                                            |                              |             |             |           |       |
| Sbjct 53668   | TGFKVGRFFA 53697                                                                                                      |                              |             |             |           |       |

Range 4: 54182 to 54316 [GenBankGraphics](#)

Alignment statistics for match #4

| Score          | Expect                                                                                      | Method                       | Identities | Positives  | Gaps     | Frame |
|----------------|---------------------------------------------------------------------------------------------|------------------------------|------------|------------|----------|-------|
| 65.9 bits(159) | 1e-10                                                                                       | Compositional matrix adjust. | 30/45(67%) | 33/45(73%) | 0/45(0%) | +2    |
| Query 150      | CAWSFALILCIPQLVFSYQEVMPRIWDCWATFDIQGKAYVTW 194<br>C +F LI I QL VFSYQEV P IWDCWATF+ GE+AYVTW |                              |            |            |          |       |
| Sbjct 54182    | CRFTFPLITIIIRQLIVFSYQEVSPDIWDCWATFNPPSGERAYVTW 54316                                        |                              |            |            |          |       |

**Diachasma alloeum** Dall\_scaffold\_00798\_contig13, whole genome shotgun sequence

Sequence ID: [gb|LDKA01015940.1](#)|Length: 53672|Number of Matches: 2

Related Information

Range 1: 50694 to 50906 [GenBankGraphics](#)

Query: Polistes\_canadensis gi|954548184|ref|XP\_014616661.1|

Alignment statistics for match #1

| Score         | Expect                                                                                                                     | Method                       | Identities | Positives  | Gaps     | Frame |
|---------------|----------------------------------------------------------------------------------------------------------------------------|------------------------------|------------|------------|----------|-------|
| 106 bits(265) | 9e-24                                                                                                                      | Compositional matrix adjust. | 45/71(63%) | 56/71(78%) | 0/71(0%) | +3    |
| Query 93      | RFQGGVLVCKLVKFFQPFGLYLSSYILTATAIDRYHAICHPLSYCVTSRQSRIMVYCAW<br>RFQGG VLCK+VKF QP G Y S+Y+L A AIDRYHAIC+P +YC T +Q+++MVY AW |                              | 152        |            |          |       |
| Sbjct 50694   | RFQGGAVLCKMVKFGQPLGHYASTYVLIAGRIDRYHAICYPPNYCRTHKQAKVMVYIAW                                                                |                              | 50873      |            |          |       |
| Query 153     | SFALILCIPQL 163<br>+L LCIPQ+                                                                                               |                              |            |            |          |       |
| Sbjct 50874   | GISLALCIPQV 50906                                                                                                          |                              |            |            |          |       |

Range 2: 48177 to 48419 [GenBankGraphics](#)

Alignment statistics for match #2

| Score          | Expect                                                                                                                  | Method                       | Identities | Positives  | Gaps     | Frame |
|----------------|-------------------------------------------------------------------------------------------------------------------------|------------------------------|------------|------------|----------|-------|
| 87.0 bits(214) | 3e-17                                                                                                                   | Compositional matrix adjust. | 51/81(63%) | 65/81(80%) | 1/81(1%) | +3    |
| Query 12       | ANEKDTDRDENLAKWEIVLLANILIFTIFGNSLVLLSLYLKRY-RAHKKLSRMYFFIMNL<br>+N +D RDE LA WEIV+L IL+ T+ GN LVL +LYLR+Y +KL+RMYPF+M+L |                              | 70         |            |          |       |
| Sbjct 48177    | SNMTEDPDRDEFILAVWEIVLILVILVITVVGNFVLFVLFALYLRYYCGRRRKLTRMYFFMMHL                                                        |                              | 48356      |            |          |       |
| Query 71       | SIADLLTGLLDVLPQLAWDIT 91<br>SIADL+TG+L+VLPQL WDIT                                                                       |                              |            |            |          |       |
| Sbjct 48357    | SIADLMTGVLNVLPQLVWDIT 48419                                                                                             |                              |            |            |          |       |

**Diachasma alloeum** Dall\_scaffold\_00798\_contig14, whole genome shotgun sequence

Sequence ID: [gb|LDKA01015941.1](#)|Length: 26306

Number of Matches: 3

Range 1: 813 to 1109 [GenBankGraphics](#)

Query: Polistes\_canadensis gi|954548184|ref|XP\_014616661.1|

Alignment statistics for match #1

| Score          | Expect                                                                                                            | Method                       | Identities  | Positives   | Gaps      | Frame |
|----------------|-------------------------------------------------------------------------------------------------------------------|------------------------------|-------------|-------------|-----------|-------|
| 83.6 bits(205) | 5e-27                                                                                                             | Compositional matrix adjust. | 44/100(44%) | 66/100(66%) | 1/100(1%) | +3    |
| Query 195      | YSLMVFLLPFIVLVYTYVVICVGVNQSNKMSGAVDDRAYirsisnyernrssfiskAMIN<br>YS+ V LLPF VLVYTYV +C +W++ +++ R ++ + + NR IS+A I |                              | 254         |             |           |       |
| Sbjct 813      | YSITVLLLPFSVLVYTYVSVCAEIKWNTTEIT-VFGHRGEVVKRMSRENNREPVISRARIK                                                     |                              | 989         |             |           |       |
| Query 255      | TVKQTIAVITLYAITSIPFIGCELWVSWDTKAFESSFANG 294<br>TVKQ I V++L+ ITS PF+GC+LW ++D A ++SF G                            |                              |             |             |           |       |
| Sbjct 990      | TVKQMITVSLHVITSAPFVGCQLWAAFPDPAVKTSFYEG 1109                                                                      |                              |             |             |           |       |

Range 2: 625 to 723 [GenBankGraphics](#)

Alignment statistics for match #2

| Score          | Expect                                                                | Method                       | Identities | Positives  | Gaps     | Frame |
|----------------|-----------------------------------------------------------------------|------------------------------|------------|------------|----------|-------|
| 57.0 bits(136) | 5e-27                                                                 | Compositional matrix adjust. | 22/33(67%) | 27/33(81%) | 0/33(0%) | +1    |
| Query 162      | QLFVFSYQEVMPRIWDCWATFDIQGKAYVTW 194<br>Q+F+FSYQE+ PRIWDCWA F G++AYVTW |                              |            |            |          |       |
| Sbjct 625      | QIFIFSYQEISPRIWDCWADFTPPHGQRAYVTW 723                                 |                              |            |            |          |       |

Range 3: 2519 to 2698 [GenBankGraphics](#)

Alignment statistics for match #3

| Score          | Expect                                                                                                         | Method                       | Identities | Positives  | Gaps     | Frame |
|----------------|----------------------------------------------------------------------------------------------------------------|------------------------------|------------|------------|----------|-------|
| 51.2 bits(121) | 8e-06                                                                                                          | Compositional matrix adjust. | 32/60(53%) | 38/60(63%) | 0/60(0%) | +2    |
| Query 294      | GPAFTILALLNSLTSCVNPWIYLSFNRELRQTLMNIFCNRNEHSQKYYGQRMRRSDSDND<br>GPAF IL+LL+SLTSCVNPWIY+ FNRELR TL Y +G+ + SD D |                              | 353        |            |          |       |
| Sbjct 2519     | GPAFALLSLLSLTSCVNPWIYMGFNRELRSTLKKYIKKLLILGRSMTFGESKHQNSDITD                                                   |                              | 2698       |            |          |       |

**Cephus cinctus** Ccin1\_scaffold0013\_contig28, whole genome shotgun sequence

Sequence ID: [ajb|AMWH01000205.1](#)|Length: 159119

Number of Matches: 4

Range 1: 118317 to 118703[GenBankGraphics](#)

Query: *Polistes canadensis* gi|954548184|ref|XP\_014616661.1|

Alignment statistics for match #1

| Score         | Expect                                                      | Method                       | Identities  | Positives   | Gaps        | Frame |
|---------------|-------------------------------------------------------------|------------------------------|-------------|-------------|-------------|-------|
| 158 bits(400) | 6e-88                                                       | Compositional matrix adjust. | 76/129(59%) | 89/129(68%) | 25/129(19%) | -1    |
| Query 91      | TFRFQGGVLCKLVKFPFGLYLSSYILTATAIDRYHAICHPLSYCSVTSRQSRIMVYC   |                              | 150         |             |             |       |
|               | + RFQGG +LCKLVK+ QP G YLSSY+LT TA+DRYHAIC+PLSYC TSRQSR+MVYC |                              |             |             |             |       |
| Sbjct 118703  | SIRFQGGALLCKLVKYGQPLGPLYLSSYVLTALDRYHAICYPLSYCGTTSRQSRVMVYC |                              | 118524      |             |             |       |
| Query 151     | AWSFALILCIP-----QLFVFSYQEVMPRIWDCWATFDIQ                    |                              | 185         |             |             |       |
|               | AW AL C P QQLFVFSYQEVMP ++DCWATF++                          |                              |             |             |             |       |
| Sbjct 118523  | AWVIALTFCTPQVCQSF*VAF*FSIDISLELCPLCQLFVFSYQEVMPGVDFCWATFELS |                              | 118344      |             |             |       |
| Query 186     | FGEKAYVTW 194                                               |                              |             |             |             |       |
|               | +GE+AYVTW                                                   |                              |             |             |             |       |
| Sbjct 118343  | YGEQAYVTW 118317                                            |                              |             |             |             |       |

Range 2: 118784 to 119044[GenBankGraphics](#)

Alignment statistics for match #2

| Score         | Expect                                                      | Method                       | Identities | Positives  | Gaps     | Frame |
|---------------|-------------------------------------------------------------|------------------------------|------------|------------|----------|-------|
| 112 bits(279) | 6e-88                                                       | Compositional matrix adjust. | 58/89(65%) | 69/89(77%) | 3/89(3%) | -2    |
| Query 6       | NSSFTVANEKEDTRDENLAKWEIVLLANILIFTIFGNSLVLLSLYLRKYR-AHKLSRMV |                              | 64         |            |          |       |
|               | N +F NE DTRDE LA+WEI L++IL T+ GN VL +LYLR+Y + KKL+RMV       |                              |            |            |          |       |
| Sbjct 119044  | NKTFEEVNE--DTRDEYLAQWEITLSSILALTLVGNIFVLFPALYLRYSISKKLTRMY  |                              | 118871     |            |          |       |
| Query 65      | FFIMNLSIADLLTGLLDVLPQLAWDITFR 93                            |                              |            |            |          |       |
|               | FPI++LSIADLLTGL VLPQLAWDITFR                                |                              |            |            |          |       |
| Sbjct 118870  | FFIIHLSIADLLTGLFSVLPQLAWDITFR 118784                        |                              |            |            |          |       |

Range 3: 117938 to 118246[GenBankGraphics](#)

Alignment statistics for match #3

| Score          | Expect                                                     | Method                       | Identities  | Positives   | Gaps      | Frame |
|----------------|------------------------------------------------------------|------------------------------|-------------|-------------|-----------|-------|
| 94.4 bits(233) | 6e-88                                                      | Compositional matrix adjust. | 53/103(51%) | 72/103(69%) | 3/103(2%) | -2    |
| Query 195      | YSLMVFLLPFIVLVYTYVVICVGVWQSNKMSGAVD--DRAYIRISISYRNRSSFISKA |                              | 251         |             |           |       |
|                | YS VFLLP VL+YTY GIC+G+W+++ + G + + + + N+ RNR+ IS+A        |                              |             |             |           |       |
| Sbjct 118246   | YSFVFLPLCLVLLYTYTGICMGIWRNSNVLDGLTEIGANGSLEKQNHFRNRTLISRA  |                              | 118067      |             |           |       |
| Query 252      | MINTVKQTIATIVITLYAITSIPFIGCELWVSWDTKAFESSFANG 294          |                              |             |             |           |       |
|                | INT+KQTIAVI+LY I S PFIGC+LW SWD +A S F +G                  |                              |             |             |           |       |
| Sbjct 118066   | RINTLKQTIATIVISLYIICSSPFIGCQLWASWDPQASSSPFYSG 117938       |                              |             |             |           |       |

Range 4: 117681 to 117782[GenBankGraphics](#)

Alignment statistics for match #4

| Score          | Expect                                     | Method                       | Identities | Positives  | Gaps     | Frame |
|----------------|--------------------------------------------|------------------------------|------------|------------|----------|-------|
| 56.6 bits(135) | 7e-08                                      | Compositional matrix adjust. | 26/34(76%) | 30/34(88%) | 0/34(0%) | -1    |
| Query 294      | GPAFTILALLNSLTCVNPWYILSFNRELRLTLM 327      |                              |            |            |          |       |
|                | G FTILALL+SL SCVNPWYIL+FN ELR+TL+          |                              |            |            |          |       |
| Sbjct 117782   | GTTFTILALLSSLNSCVNFWIYLAFFNRELRLTLI 117681 |                              |            |            |          |       |

**Trichogramma pretiosum** Contig3858, whole genome shotgun sequence

Sequence ID: [ajb|JARR01003858.1](#)|Length: 67335

Number of Matches: 4

Range 1: 28185 to 28532[GenBankGraphics](#)

Query: *Polistes canadensis* gi|954548184|ref|XP\_014616661.1|

Alignment statistics for match #1

| Score         | Expect                                                      | Method                       | Identities  | Positives   | Gaps      | Frame |
|---------------|-------------------------------------------------------------|------------------------------|-------------|-------------|-----------|-------|
| 163 bits(413) | 8e-62                                                       | Compositional matrix adjust. | 76/119(64%) | 92/119(77%) | 3/119(2%) | +3    |
| Query 93      | RFQGGVLCKLVKFPFGLYLSSYILTATAIDRYHAICHPLSYCSVTSRQSRIMVYCAW   |                              | 152         |             |           |       |
|               | RF GG +LCKLVK+ QP G YLSSY+L ATA DRYHAIC+PLSYC TSR+SRI VY AW |                              |             |             |           |       |
| Sbjct 28185   | RFHGGEILCKLVKFGQPLGSLSSYVLMATAADRYHAICYPLSYCRTTSRRSRITVYTAW |                              | 28364       |             |           |       |
| Query 153     | SFALILCIPQLFVFSYQEVMPRIWDCWATFDIQFGEKAYVTWYSLMVFLLPFIVLVYTY |                              | 211         |             |           |       |
|               | +L+LC+PQ+F+FS QE+ P IWDWATFD+ +KAYVTW +VF F++ TY            |                              |             |             |           |       |
| Sbjct 28365   | ILSLLCLPQIFIFSIEIAPGIWDCWATFDLPYAKKAYVTW--LVFKKIFVIACNTY    |                              | 28532       |             |           |       |

Range 2: 27862 to 28101[GenBankGraphics](#)

Alignment statistics for match #2

| Score          | Expect                                                        | Method                       | Identities | Positives  | Gaps     | Frame |
|----------------|---------------------------------------------------------------|------------------------------|------------|------------|----------|-------|
| 92.8 bits(229) | 8e-62                                                         | Compositional matrix adjust. | 48/80(60%) | 67/80(83%) | 1/80(1%) | +1    |
| Query 15       | EKDTRDENLAKWEIVLLANILIFTIFGNSLVLLSLYLRKYRAHKK--LSRMVFFIMNLSIA |                              | 73         |            |          |       |
|                | E+D RD +L K E+++L+ I + T+ GNSLVL ++YLR+ R ++ L+RM+FF+M+LSIA   |                              |            |            |          |       |
| Sbjct 27862    | EEDERDNDLVKVELLVLSLIFLVTLMGNSLVLFVAILYLRRCRGRRLTRMHFVHMLSIA   |                              | 28041      |            |          |       |
| Query 74       | DLITGLLDVLPQLAWDITFR 93                                       |                              |            |            |          |       |
|                | DL+TGLL+VLPQLAWDITFR                                          |                              |            |            |          |       |
| Sbjct 28042    | DLITGLLNVLPQLAWDITFR 28101                                    |                              |            |            |          |       |

Range 3: 29159 to 29452 [GenBankGraphics](#)

Alignment statistics for match #3

| Score          | Expect                                                        | Method                       | Identities  | Positives   | Gaps      | Frame |
|----------------|---------------------------------------------------------------|------------------------------|-------------|-------------|-----------|-------|
| 88.6 bits(218) | 4e-18                                                         | Compositional matrix adjust. | 48/100(48%) | 69/100(69%) | 2/100(2%) | +2    |
| Query 195      | YSLMVFLLPFIVLVYTYVVGICVGVWQSNKMSGAVDDRAyirsisnysrnrssfisKAMIN |                              | 254         |             |           |       |
|                | +S+M+FLLPF VL +TYV IC+ +W + ++ A+ + +RN+ S ISKA IN            |                              |             |             |           |       |
| Sbjct 29159    | FSMIFLPLPFVSLTFTTYVEICLSIWHNREV--AMLESQQALQPQIRARNQGSLSKAKIN  |                              | 29332       |             |           |       |
| Query 255      | TVKQTIATIVITLYAITSIPFIGCELWVSWDTKAFESSFANG                    |                              | 294         |             |           |       |
|                | T+KQT+AV+ LYA +S+PFIG +LW +WD A ES+F G                        |                              |             |             |           |       |
| Sbjct 29333    | TIKQTLAVVILYAASSMPFIGQLWSAWDPYAAESAFFPKG                      |                              | 29452       |             |           |       |

Range 4: 29709 to 29822 [GenBankGraphics](#)

Alignment statistics for match #4

| Score          | Expect                                  | Method                       | Identities | Positives  | Gaps     | Frame |
|----------------|-----------------------------------------|------------------------------|------------|------------|----------|-------|
| 43.1 bits(100) | 0.001                                   | Compositional matrix adjust. | 26/38(68%) | 32/38(84%) | 0/38(0%) | +3    |
| Query 292      | ANGPAFTLLALLNSLTSCVNPWYILSFNRELRLQTLNMY |                              | 329        |            |          |       |
|                | +GP FTIL+LL+SLTSCVNPWYIL+F+ ELR LM +    |                              |            |            |          |       |
| Sbjct 29709    | CSGPTFTILSLLSSTSCVNPWYILYLFYSYELRIVLMKF |                              | 29822      |            |          |       |

**Copidosoma floridanum** Contig51734, whole genome shotgun sequence

Sequence ID: [gb|JBOX01051729.1|](#) Length: 2154

Number of Matches: 4

Range 1: 1652 to 1864 [GenBankGraphics](#)

Query: Polistes\_canadensis gi|954548184|ref|XP\_014616661.1|

Alignment statistics for match #1

| Score         | Expect                                                        | Method                       | Identities | Positives  | Gaps     | Frame |
|---------------|---------------------------------------------------------------|------------------------------|------------|------------|----------|-------|
| 116 bits(291) | 3e-27                                                         | Compositional matrix adjust. | 53/71(75%) | 60/71(84%) | 0/71(0%) | -3    |
| Query 93      | RFQGGVLVCKLVKFFQPFGLYLSYILTATAIDRYHAICHPLSYCSVTSRQSRIMVYCAW   |                              | 152        |            |          |       |
|               | RF+GG VLCK+VKF QP G YLSSYIL ATA+DRYHAIC PLSYC TSR+SR+MVY AW   |                              |            |            |          |       |
| Sbjct 1864    | RFKGGVDLVCKMVKFGQPLGSLYLSYILITAVDRYHAICFPLSYCRTTSSRRSRVMVYSAW |                              | 1685       |            |          |       |
| Query 153     | SFALILCIPQL                                                   |                              | 163        |            |          |       |
|               | ALILC+PQ+                                                     |                              |            |            |          |       |
| Sbjct 1684    | VLALILCVPOV                                                   |                              | 1652       |            |          |       |

Range 2: 980 to 1282 [GenBankGraphics](#)

Alignment statistics for match #2

| Score          | Expect                                                        | Method                       | Identities  | Positives   | Gaps      | Frame |
|----------------|---------------------------------------------------------------|------------------------------|-------------|-------------|-----------|-------|
| 79.7 bits(195) | 3e-22                                                         | Compositional matrix adjust. | 47/101(47%) | 70/101(69%) | 1/101(0%) | -3    |
| Query 195      | YSLMVFLLPFIVLVYTYVVGICVGVWQSNKMSGAVD-DRAyirsisnysrnrssfisKAMI |                              | 253         |             |           |       |
|                | YSL VFL+PF VL +TY IC +W++ + + ++ +++SN +RN+ + ISKA +          |                              |             |             |           |       |
| Sbjct 1282     | YSLTVFLVFPFVSLTFTTYTRICCSIWRNRDVLVLGNLEKQQQALSNQARNQHALISKAKM |                              | 1103        |             |           |       |
| Query 254      | NTVKQTIATIVITLYAITSIPFIGCELWVSWDTKAFESSFANG                   |                              | 294         |             |           |       |
|                | +TVKQT+AV+ LYA +S+PFIG+LW +W A ES F G                         |                              |             |             |           |       |
| Sbjct 1102     | STVKQTLAVVILYAASSLPFIGQLWATWVPGAESPFYTG                       |                              | 980         |             |           |       |

Range 3: 1404 to 1514 [GenBankGraphics](#)

Alignment statistics for match #3

| Score          | Expect                                 | Method                       | Identities | Positives  | Gaps     | Frame |
|----------------|----------------------------------------|------------------------------|------------|------------|----------|-------|
| 45.1 bits(105) | 3e-22                                  | Compositional matrix adjust. | 20/38(53%) | 27/38(71%) | 1/38(2%) | -2    |
| Query 157      | IILCIPQLFVFSYQVEMPRWDWCATFDIQFGEKAYVTW |                              | 194        |            |          |       |
|                | I+C+ Q+F+FS + V +WDCWATF G+K YVTW      |                              |            |            |          |       |
| Sbjct 1514     | IICVFQVFIFSLRIVSAGVWDCWATFT-GHGQKIYVTW |                              | 1404       |            |          |       |

Range 4: 757 to 978 [GenBankGraphics](#)

Alignment statistics for match #4

| Score          | Expect                                                       | Method                       | Identities | Positives  | Gaps      | Frame |
|----------------|--------------------------------------------------------------|------------------------------|------------|------------|-----------|-------|
| 50.4 bits(119) | 1e-05                                                        | Compositional matrix adjust. | 36/74(49%) | 48/74(64%) | 9/74(12%) | -1    |
| Query 276      | CELWVSWDTKAFESSFAN---GPAFTLLALLNSLTSCVNPWYILSFNRELRLQTLNMYFC |                              | 331        |            |           |       |
|                | C ++ ++ F S+A GPAFTIL+LL+SLTSCVNPWYIL F+RELR +L+ +           |                              |            |            |           |       |
| Sbjct 978      | CCVFSYQSRIFSIYARVLCAGPAFTILSLLSSTSCVNPWYILVFSRELRVSLIKFLH    |                              | 799        |            |           |       |
| Query 332      | -----NRNEHSQKY                                               |                              | 340        |            |           |       |
|                | NR+ S KY                                                     |                              |            |            |           |       |
| Sbjct 798      | HLVKRNRSSSSGKY                                               |                              | 757        |            |           |       |

**Copidosoma floridanum** Contig51735, whole genome shotgun sequence

Sequence ID: [gb|JBOX01051730.1|](#) Length: 2519

Number of Matches: 1

Range 1: 182 to 430 [GenBankGraphics](#)

Query: Polistes\_canadensis gi|954548184|ref|XP\_014616661.1|

Alignment statistics for match #1

| Score          | Expect                                                       | Method                       | Identities | Positives  | Gaps     | Frame |
|----------------|--------------------------------------------------------------|------------------------------|------------|------------|----------|-------|
| 82.0 bits(201) | 1e-15                                                        | Compositional matrix adjust. | 47/83(57%) | 65/83(78%) | 1/83(1%) | -2    |
| Query 13       | NEEKDRDENLAKWEIVLLANILIFTIFGNSLVLLSFLYLRKYRAHKKL-SRMVFFIMNLS |                              | 71         |            |          |       |
|                | ++ +D RDE+LA WE+ LL IL ++ N LVL ++YLR+YR + +RM+FF+M+LS       |                              |            |            |          |       |
| Sbjct 430      | SKGEDWRDEDLAFWEVALLGFILAVSVVSNGLVLFALYLRRYRGRHRLTRMHFFVMHLS  |                              | 251        |            |          |       |
| Query 72       | IADLLTGLLDVLPQLAWDITFRF                                      |                              | 94         |            |          |       |
|                | IADL TGLL+VLPQLAWDIT+R+                                      |                              |            |            |          |       |
| Sbjct 250      | IADLTTGLLNVLPLQLAWDITRW                                      |                              | 182        |            |          |       |

**Fopius arisanus** strain USDA-PBARC FA\_bdor contig003174, whole genome shotgun sequence  
 Sequence ID: [gb|JRKH01003174.1](#)|Length: 107392  
 Number of Matches: 4  
 Range 1: 6563 to 7036[GenBankGraphics](#)  
 Query: Polistes\_canadensis gi|954548184|ref|XP\_014616661.1|

Alignment statistics for match #1

| Score         | Expect                                                        | Method                       | Identities  | Positives   | Gaps        | Frame |
|---------------|---------------------------------------------------------------|------------------------------|-------------|-------------|-------------|-------|
| 117 bits(294) | 1e-58                                                         | Compositional matrix adjust. | 73/159(46%) | 97/159(61%) | 25/159(15%) | +2    |
| Query 195     | YSLMVFLLPFIVLVYTYVVICVGVNQSNKMSGAVDDRAYirsisnyernrsffisKAMIN  |                              | 254         |             |             |       |
| Sbjct 6563    | YSITVLMPLPFSVLVYTYVVICREIWKNTTEIT-VFGRHGEVVRMSRENNREPVISRARIK |                              | 6739        |             |             |       |
| Query 255     | TVKQTIATIVITLYAITSIPFFIGCELWVSWDTKAFESSFANGP-----             |                              | 295         |             |             |       |
| Sbjct 6740    | TVKQ I V++L+ ITS PF+GC+LW +WD A ++ F GP                       |                              | 6919        |             |             |       |
| Query 296     | -----AFTILALLNSLTCVNFWIYLSFNRELRQTLNMY 329                    |                              |             |             |             |       |
| Sbjct 6920    | AFTIL+LL+SLTSCVNFWIY+ FNRELR TL NY                            |                              | 7036        |             |             |       |

Range 2: 6057 to 6275[GenBankGraphics](#)

Alignment statistics for match #2

| Score         | Expect                                                      | Method                       | Identities | Positives  | Gaps     | Frame |
|---------------|-------------------------------------------------------------|------------------------------|------------|------------|----------|-------|
| 105 bits(261) | 1e-58                                                       | Compositional matrix adjust. | 45/73(62%) | 56/73(76%) | 0/73(0%) | +3    |
| Query 93      | RFQGGVLVCKLVKFFQPFGLYSSYILTATAIDRYHAICHPLSYCSVTSRQSRIMVYCAW |                              | 152        |            |          |       |
| Sbjct 6057    | RFQGG +LCKLVKF QP G Y S+Y+L A AIDRYHAIC+P +YC T RQ+R+MVY AW |                              | 6236       |            |          |       |
| Query 153     | SFALILCIPQLFV 165                                           |                              |            |            |          |       |
| Sbjct 6237    | + LC+PQ+ +                                                  |                              | 6275       |            |          |       |

Range 3: 6385 to 6468[GenBankGraphics](#)

Alignment statistics for match #3

| Score          | Expect                          | Method                       | Identities | Positives  | Gaps     | Frame |
|----------------|---------------------------------|------------------------------|------------|------------|----------|-------|
| 43.1 bits(100) | 1e-58                           | Compositional matrix adjust. | 17/28(61%) | 20/28(71%) | 0/28(0%) | +1    |
| Query 167      | SYQEVMPRIWDCWATFDIQFGKAYVTW 194 |                              |            |            |          |       |
| Sbjct 6385     | SYQE+ P IWDCA F G++ YVTW        |                              | 6468       |            |          |       |

Range 4: 5664 to 5894[GenBankGraphics](#)

Alignment statistics for match #4

| Score          | Expect                                                     | Method                       | Identities | Positives  | Gaps     | Frame |
|----------------|------------------------------------------------------------|------------------------------|------------|------------|----------|-------|
| 99.0 bits(245) | 1e-21                                                      | Compositional matrix adjust. | 49/77(64%) | 63/77(81%) | 1/77(1%) | +3    |
| Query 16       | KDTRDENLAKWEIVLLANILIFTIFGNSLVLLSLYLRY-RAHKLSRMYFFIMNLSIAD |                              | 74         |            |          |       |
| Sbjct 5664     | +D RDE LA WE+V+L IL+ T+ GN LVL +LYLR+Y +KL+RMYFF+M+LSIAD   |                              | 5843       |            |          |       |
| Query 75       | LLTGLLDVLPQLAWDIT 91                                       |                              |            |            |          |       |
| Sbjct 5844     | L+TG+L+VLPQL W DIT                                         |                              | 5894       |            |          |       |

**Hypochthonius rufulus** scaffold216102\_cov125, whole genome shotgun sequence

Sequence ID: [gb|LBF01050327.1](#)|Length: 5802  
 Number of Matches: 1  
 Range 1: 339 to 1244[GenBankGraphics](#)  
 Query: Daphnia\_pulex tr|K9JBV2|K9JBV2\_DAPPU

Alignment statistics for match #1

| Score         | Expect                                                        | Method                       | Identities   | Positives    | Gaps        | Frame |
|---------------|---------------------------------------------------------------|------------------------------|--------------|--------------|-------------|-------|
| 240 bits(612) | 2e-68                                                         | Compositional matrix adjust. | 143/360(40%) | 196/360(54%) | 62/360(17%) | -2    |
| Query 17      | RDEKLASVEISTLSVILVAVTSLNLTMLIAIWRQRRNPLSRMYFFMMHLSLADLLVALF   |                              | 76           |              |             |       |
| Sbjct 1244    | RDE LA EI +IL+LA+ N +L + +QR+ RP SR+Y FM HLSLADLLVA+F         |                              | 1065         |              |             |       |
| Query 77      | NILPQLAWDITVRFQGGDVLCRFVKYAQVMTLYLSTYILMFMAVDRYRAV-CCRNLHWNS  |                              | 135          |              |             |       |
| Sbjct 1064    | NILPQL W DIT+RF+ GD +CR VKY QV LYLSTYI++ M++DRY + + HW +      |                              | 885          |              |             |       |
| Query 136     | LKVAKCFVAASVVMALFISIPQAVIFHEEEISV--GVTDCWQVPEWGAAYVTFVVS      |                              | 193          |              |             |       |
| Sbjct 884     | K K + +W+++ LFSIPQA+IF +E+ + GV DCW F W K YV+WFV S            |                              | 708          |              |             |       |
| Query 194     | IFGAPLLVIGVCYVICRQIMYISqsalpssqqpptsaypaLTSETGSTLSVMRRWILR    |                              | 253          |              |             |       |
| Sbjct 707     | +F PL++I CYG IC ++W Y+ S T +L V                               |                              | 606          |              |             |       |
| Query 254     | ASLRWQKSRSSSNNNGTKNHSAIANTSQLSDTI-PMRSLATQPASNPLSAEAKVIRslppp |                              | 312          |              |             |       |
| Sbjct 605     | R ++N+ + N + I R + + L+ E +                                   |                              | 474          |              |             |       |
| Query 313     | lspqccqmqmplRRNSNQNRITKAKMKTIKLTLAVLFCFVACWAPFCITQLIMVYCPPTS  |                              | 372          |              |             |       |
| Sbjct 473     | + N I++AK+KTIKLT+ VV+CF CWAPFCITQL + + PP S                   |                              | 339          |              |             |       |

**Steganacarus magnus**, whole genome shotgun sequence

Sequence ID: [gb|LBFN01047006.1](#)|Length: 3438  
 Number of Matches: 1  
 Range 1: 853 to 1449[GenBankGraphics](#)

Query: Daphnia\_pulex tr|K9JBV2|K9JBV2\_DAPPU

Alignment statistics for match #1

| Score         | Expect                                                         | Method                       | Identities  | Positives    | Gaps      | Frame |
|---------------|----------------------------------------------------------------|------------------------------|-------------|--------------|-----------|-------|
| 187 bits(476) | 2e-50                                                          | Compositional matrix adjust. | 94/202(47%) | 136/202(67%) | 7/202(3%) | +1    |
| Query 17      | RDEKLASVEISTLSVILVAVTSNLTMLIAIWRQRNRPLSRMYFFMMHLSLADLLVALF     |                              | 76          |              |           |       |
|               | RDE LA +EI L +I +L + N +LIA+ +R ++RMY+F++HL ++DL+              |                              |             |              |           |       |
| Sbjct 853     | RDEDLAKMEIIVLILIFILIIIGNSCVLIALAAKRFK--MTRMYFLLHLICISDLITGCC   |                              | 1026        |              |           |       |
| Query 77      | NILPQLAWDITYRFQGGDVLRCRFVKYAQVMTLYLSTYILMFMAVDYRAVC--CRNLHWN   |                              | 134         |              |           |       |
|               | +LPQ+AWDITYRF+GG++LC+FKVQ Q++ YLS+Y+L+ A+DRY+A+C N W           |                              |             |              |           |       |
| Sbjct 1027    | TVLPQIAWDITYRFKGGGNILCKFVKTIQLLGPYLSYVLVVNAIDRYQAICFPLTNSQWT   |                              | 1206        |              |           |       |
| Query 135     | SLKVAKCFVAASWVMALLFSPQAVIFHEEEI--SVGVTDCWVQFVEPWGAKAYVTWVW     |                              | 192         |              |           |       |
|               | S + +K + +W +AI+FS PQA F +EI S G +DCW F EPWG K YVTW+ +         |                              |             |              |           |       |
| Sbjct 1207    | S-RQSKLMIATIAWCIAIVFSSPQAFPPSYQEIPNSSGESDCWGTFFPEPWGEKLYVTWYAI |                              | 1383        |              |           |       |
| Query 193     | SIFGAPLLVIGVCYGVICRQIW 214                                     |                              |             |              |           |       |
|               | SIF PL +I Y ICR++W                                             |                              |             |              |           |       |
| Sbjct 1384    | SIFFIPLFIITYTYVYICREW 1449                                     |                              |             |              |           |       |

Dermatophagoides farinae contig5815, whole genome shotgun sequence

Sequence ID: gb|ASGP01005815.1|Length: 7082

Number of Matches: 1

Range 1: 3977 to 4369GenBankGraphics

Query: Daphnia\_pulex tr|K9JBV2|K9JBV2\_DAPPU

Alignment statistics for match #1

| Score         | Expect                                                        | Method                       | Identities  | Positives   | Gaps      | Frame |
|---------------|---------------------------------------------------------------|------------------------------|-------------|-------------|-----------|-------|
| 122 bits(307) | 2e-28                                                         | Compositional matrix adjust. | 60/133(45%) | 90/133(67%) | 9/133(6%) | +2    |
| Query 52      | RNRPL--SRMYFFMMHLSLADLLVALFNILPQLAWDITYRFQGGDVLRCRFVKYAQVMTLY |                              | 109         |             |           |       |
|               | +NR L +RMYFF+ HLS+ADL+ FN+LPQL W+I RF GG+VLC+ +K+ Q++ Y       |                              |             |             |           |       |
| Sbjct 3977    | KNRKLKRNMYFFLAHLSIADLVTGFFNVLPQLGWEIASRFYGGNVLCKMIKFLQILGPY   |                              | 4156        |             |           |       |
| Query 110     | LSTYILMFMAVDYRAVCCRNHLHNSL--KVAKCFVAASWVMALLFSPQAVIFHEEEI     |                              | 166         |             |           |       |
|               | LS+Y+L+ ++DRY+A+C + NSL + ++ VA +W+M++LF PQ IF ++I            |                              |             |             |           |       |
| Sbjct 4157    | LSSVVLVMTSIDRYQAIC--HPLSNSLAHTRRSRWMVAVAWIMSLFCTPQTFIFSQKI    |                              | 4330        |             |           |       |
| Query 167     | SVGVTD--CWVQF 177                                             |                              |             |             |           |       |
|               | S D CW F                                                      |                              |             |             |           |       |
| Sbjct 4331    | SPTSDDYECWATF 4369                                            |                              |             |             |           |       |

Sarcoptes scabiei Contig17956, whole genome shotgun sequence

Sequence ID: gb|JXLN01017957.1|Length: 20533

Number of Matches: 3

Range 1: 20086 to 20493GenBankGraphics

Query: Daphnia\_pulex tr|K9JBV2|K9JBV2\_DAPPU

Alignment statistics for match #1

| Score         | Expect                                                         | Method                       | Identities  | Positives   | Gaps      | Frame |
|---------------|----------------------------------------------------------------|------------------------------|-------------|-------------|-----------|-------|
| 111 bits(277) | 1e-24                                                          | Compositional matrix adjust. | 53/136(39%) | 84/136(61%) | 7/136(5%) | -2    |
| Query 53      | RNRPL--SRMYFFMMHLSLADLLVALFNILPQLAWDITYRFQGGDVLRCRFVKYAQVMTLYL |                              | 110         |             |           |       |
|               | NR L +RMYFF+ HLS+ADL+ FN+LPQLAW+ RF GG+ LC+ +K+ Q++ YL         |                              |             |             |           |       |
| Sbjct 20493   | NRKLKRNMYFFLAHLSIADLVTGFFNVLPQLAWEAARFFYGGNVLCKTIKFLQILGPYL    |                              | 20314       |             |           |       |
| Query 111     | STYILMFMAVDYRAVCC--CRNLHNSLKVAKCFVAASWVMALLFSPQAVIFHEEEIS      |                              | 167         |             |           |       |
|               | S+Y+L+ A+DRY+A+C + + + ++ +A +W + ++ + PQ IF + +S              |                              |             |             |           |       |
| Sbjct 20313   | SSVVLVMTAIDRYQAICYPLSNSFATKNTRRSRWMIAIAWIFSLSYCTPQCFIFSQRVS    |                              | 20134       |             |           |       |
| Query 168     | VGVTD--CWVQFVEPW 181                                           |                              |             |             |           |       |
|               | D CW F W                                                       |                              |             |             |           |       |
| Sbjct 20133   | YETDDYECWGTQVSW 20086                                          |                              |             |             |           |       |

Range 2: 14702 to 14812GenBankGraphics

Alignment statistics for match #2

| Score          | Expect                                     | Method                       | Identities | Positives  | Gaps     | Frame |
|----------------|--------------------------------------------|------------------------------|------------|------------|----------|-------|
| 48.1 bits(113) | 2e-04                                      | Compositional matrix adjust. | 17/37(46%) | 26/37(70%) | 0/37(0%) | -1    |
| Query 179      | EPWGAKAYVTWVVSIFGAPLLVIGVCYGVICRQIWI 215   |                              |            |            |          |       |
|                | +PW +K YVTW+ +S+F P L++ + ICR+IWI          |                              |            |            |          |       |
| Sbjct 14812    | QPWMSKVYVTWYAISVIFVPLILLWTHYFICREIWI 14702 |                              |            |            |          |       |

Range 3: 5948 to 6088GenBankGraphics

Alignment statistics for match #3

| Score         | Expect                                                | Method                       | Identities | Positives  | Gaps     | Frame |
|---------------|-------------------------------------------------------|------------------------------|------------|------------|----------|-------|
| 41.6 bits(96) | 0.020                                                 | Compositional matrix adjust. | 21/49(43%) | 31/49(63%) | 2/49(4%) | -1    |
| Query 372     | SQADVSPVAVIILLASLNSCSNPWIYLFAGSLLNQMRVCSILLRST 420    |                              |            |            |          |       |
|               | S + PV I++LL SLNSC NPWIY+ F+ +L+ +C L+S+              |                              |            |            |          |       |
| Sbjct 6088    | SSISLGPVIAIIMLLPSLNSCVNPNWYIYFNPNI--ALLCQFPKPKSS 5948 |                              |            |            |          |       |

Centruroides exilicauda breed non domesticated species of scorpion Contig23310, whole genome shotgun sequence

Sequence ID: gb|AXZ101023310.1|Length: 1410

Number of Matches: 2

Range 1: 522 to 1058 [GenBankGraphics](#)  
 Query: Caligus\_rogercresseyi

Alignment statistics for match #1

| Score         | Expect                                                       | Method                       | Identities  | Positives    | Gaps      | Frame |
|---------------|--------------------------------------------------------------|------------------------------|-------------|--------------|-----------|-------|
| 179 bits(453) | 2e-50                                                        | Compositional matrix adjust. | 88/180(49%) | 125/180(69%) | 6/180(3%) | -2    |
| Query 24      | NSIVILAIATRHIKMTMYFFILHLSIADVLTAPLTLLELIWYTSNPFYGGALCKIV     |                              | 83          |              |           |       |
|               | N +V+LA+ R I+MTRMY+F+ HL ++D++TAF+LP++ W T F GG LCK+V        |                              |             |              |           |       |
| Sbjct 1058    | NCLVLLALMGRRIQMTRMYFLFHLCLSDLVTAFLHVLPQIAWDITY-RFRGGYLLCKLV  |                              | 882         |              |           |       |
| Query 84      | KFCQMIGPYLSSYVIMTAIDRYHAICNPLSKCTWTPKRSNIMIGLAWLVSFALCIPQAI  |                              | 143         |              |           |       |
|               | K+ Q++GPYLSY+L++TAIDRY AIC PL+ +WTP R IM+ +AW++S CIPQ        |                              |             |              |           |       |
| Sbjct 881     | KYVQLGPLYLSSYILVITAIIDRYQAICPLTSFSWTPIRGKIMVLVAWIISLCCIPQLF  |                              | 702         |              |           |       |
| Query 144     | IFGSSEAK-----YSCSASFVVDWGQKAYVTWFAVSNFFPPLLILYCYGRICKTIWDF   |                              | 198         |              |           |       |
|               | IF + + C +F+ WG+KAYVTW+ +S FF P +I+ + Y RIC +W NF            |                              |             |              |           |       |
| Sbjct 701     | IFSYQDVLGSLGVKDCWGTFIQWGEKAYVTWYTIISVFFIPFIIITFTYTRICLAVWKNF |                              | 522         |              |           |       |

Range 2: 294 to 428 [GenBankGraphics](#)

Alignment statistics for match #2

| Score         | Expect                                            | Method                       | Identities | Positives  | Gaps     | Frame |
|---------------|---------------------------------------------------|------------------------------|------------|------------|----------|-------|
| 40.4 bits(93) | 0.056                                             | Compositional matrix adjust. | 26/45(58%) | 38/45(84%) | 0/45(0%) | -2    |
| Query 303     | KRKSLKPRSHSIQGISRAKiktikltvvvivyGIACSAPPICVQL 347 |                              |            |            |          |       |
|               | +RK+ R H+++G+S+AK+KT+K+T+VVI+ YI CS PFICVQL       |                              |            |            |          |       |
| Sbjct 428     | RRKTPLSRRHNMKLSKAKVTKVITIVVIICIVCSPPICVQL 294     |                              |            |            |          |       |

**Mesobuthus martensii** Contig339050, whole genome shotgun sequence  
 Sequence ID: [gb|AYEL01079865.1](#) Length: 43520

Number of Matches: 2

Range 1: 24252 to 24788 [GenBankGraphics](#)

Query: Caligus\_rogercresseyi

Alignment statistics for match #1

| Score         | Expect                                                       | Method                       | Identities  | Positives    | Gaps      | Frame |
|---------------|--------------------------------------------------------------|------------------------------|-------------|--------------|-----------|-------|
| 178 bits(451) | 6e-48                                                        | Compositional matrix adjust. | 89/180(49%) | 123/180(68%) | 6/180(3%) | +3    |
| Query 24      | NSIVILAIATRHIKMTMYFFILHLSIADVLTAFLLPELIWYTSNPFYGGALCKIV      |                              | 83          |              |           |       |
|               | N +V+LA+ R I+MTRMY+F+ HL I+D++TAF+LP++ W T F GG LCK V        |                              |             |              |           |       |
| Sbjct 24252   | NCLVLLALMGRRIQMTRMYFLFHLCLSDLVTAFLHVLPQIAWDITY-RFRGGYFLCKFV  |                              | 24428       |              |           |       |
| Query 84      | KFCQMIGPYLSSYVIMTAIDRYHAICNPLSKCTWTPKRSNIMIGLAWLVSFALCIPQAI  |                              | 143         |              |           |       |
|               | K+ Q++GPYLSY+L++TAIDRY AIC PL+ +WTP + IM+ +AW++S CIPQ        |                              |             |              |           |       |
| Sbjct 24429   | KYVQLGPLYLSSYILVITAIIDRYQAICPLASFSWTPKIGKIMVMVAWIISLCCIPQLF  |                              | 24608       |              |           |       |
| Query 144     | IFGSSEAK-----YSCSASFVVDWGQKAYVTWFAVSNFFPPLLILYCYGRICKTIWDF   |                              | 198         |              |           |       |
|               | IF E + C +F+ WG+KAYVTW+ +S FF P +I+ + Y RIC +W NF            |                              |             |              |           |       |
| Sbjct 24609   | IFSYQEIDDFSGVKDCWGTFIQWGEKAYVTWYTIISVFFIPFIIITFTYTRICIVVWKNF |                              | 24788       |              |           |       |

Range 2: 24882 to 25016 [GenBankGraphics](#)

Alignment statistics for match #2

| Score         | Expect                                            | Method                       | Identities | Positives  | Gaps     | Frame |
|---------------|---------------------------------------------------|------------------------------|------------|------------|----------|-------|
| 39.3 bits(90) | 0.17                                              | Compositional matrix adjust. | 24/45(53%) | 38/45(84%) | 0/45(0%) | +3    |
| Query 303     | KRKSLKPRSHSIQGISRAKiktikltvvvivyGIACSAPPICVQL 347 |                              |            |            |          |       |
|               | +RK+ + H+++G+S+AK+KT+K+T+VV++ YI CS PFICVQL       |                              |            |            |          |       |
| Sbjct 24882   | RRKTFLSQRHNLKLSKAKVTKVITIVVLCYIVCSPPICVQL 25016   |                              |            |            |          |       |

**Oryctes borbonicus** contig25461, whole genome shotgun sequence

Sequence ID: [gb|LJG01025627.1](#) Length: 62898

Number of Matches: 1

Range 1: 48816 to 49289 [GenBankGraphics](#)

Query: Tribolium\_castaneum tr|A3RE84|A3RE84\_TRICA

Alignment statistics for match #1

| Score         | Expect                                                       | Method                       | Identities   | Positives    | Gaps      | Frame |
|---------------|--------------------------------------------------------------|------------------------------|--------------|--------------|-----------|-------|
| 280 bits(716) | 5e-82                                                        | Compositional matrix adjust. | 130/158(82%) | 148/158(93%) | 0/158(0%) | +3    |
| Query 24      | DRNNTDRDENLARVEVATLAIIFLVTVIGNSTVLLALWTRRRYAGRKKLSRMYFFILHLS |                              | 83           |              |           |       |
|               | D N DRDENLA++E+ATLA+IFLVT+IGN VLLALWTR+RYAGRKKLSRMYFFILHLS   |                              |              |              |           |       |
| Sbjct 48816   | DENVLDRDENLAKIEIATLAVIFLVTIIGNCVLLALWTRKRYAGRKKLSRMYFFILHLS  |                              | 48995        |              |           |       |
| Query 84      | IADLITAFLSVLPQLAWDITYRFGYGFLLCKVVKYQTLGPLYLSSYVLMATAIDRHQAIC |                              | 143          |              |           |       |
|               | IADLITAFLSVLPQLAW++T+RF GGF+LCKVVKYQTLGPLYLSSYV+ATAIDRHQAIC  |                              |              |              |           |       |
| Sbjct 48996   | IADLITAFLSVLPQLAWVTFRFGGFVLCVVKYQTLGPLYLSSYVLMATAIDRHQAIC    |                              | 49175        |              |           |       |
| Query 144     | YPLTYCSWTSRRSKVMVYLAWVASLAFQIPQLTIFTY 181                    |                              |              |              |           |       |
|               | YPLTYCSWTSRRSKVMV++AW SL+FCIPQ++ F ++                        |                              |              |              |           |       |
| Sbjct 49176   | YPLTYCSWTSRRSKVMVIAWVSLFQIPQVSNFCFS 49289                    |                              |              |              |           |       |

**Onthophagus taurus** breed undomesticated insect ContigNC25934, whole genome shotgun sequence

Sequence ID: [gb|JHOM01025934.1](#) Length: 3568

Number of Matches: 1

Range 1: 1238 to 1732 [GenBankGraphics](#)

Query: Tribolium\_castaneum tr|A3RE84|A3RE84\_TRICA

Alignment statistics for match #1

| Score         | Expect                                                        | Method                       | Identities   | Positives    | Gaps      | Frame |
|---------------|---------------------------------------------------------------|------------------------------|--------------|--------------|-----------|-------|
| 271 bits(694) | 9e-80                                                         | Compositional matrix adjust. | 128/165(78%) | 150/165(90%) | 2/165(1%) | -1    |
| Query 14      | NSTYLFDPKHEDR--NNTDRDENLARVEVATLAIIFLVTVIGNSTVLLALWTRRRYAGRKK |                              | 71           |              |           |       |
|               | N+T L D E+ + +RDENLA++E+ATLAIIFLVT+IGN TVLLALWTRRRYAGRKK      |                              |              |              |           |       |
| Sbjct 1732    | NATPLNDTTEENVIDIVERDENLAKIEIATLAIIFLVTIIGNGTVLLALWTRRRYAGRKK  |                              | 1553         |              |           |       |
| Query 72      | LSRMYFFILHLSIADLITAFLSVLPQLAWDITYRFGYGFLLCKVVKYQTLGPLYLSSYV   |                              | 131          |              |           |       |
|               | LSRMYFFILHLS+ADLITAFLSVLPQL W++T+RF GGF+LCK+VK+QTLGPLYLSSY+L  |                              |              |              |           |       |
| Sbjct 1552    | LSRMYFFILHLSVADLITAFLSVLPQLIWEVTFRFGGFILCKLVKFGQTLGPLYLSSYIL  |                              | 1373         |              |           |       |

Query 132 MATAIDRHQAICYPLTYCSWTSRRSKVMVYLAWVASLAFQIPQLT 176  
 +ATAIDRHQAICYPLTYCSWTSRRSK MV++AW SL+FCIPQ++  
 Sbjct 1372 VATAIDRHQAICYPLTYCSWTSRRSKAMVWIAWGVSLSCIPQVS 1238

**Agrilus planipennis** Contig56141, whole genome shotgun sequence

Sequence ID: [gb|JENH01056123.1|](#)Length: 4939

Number of Matches: 1

Range 1: 4171 to 4683 [GenBankGraphics](#)

Query: Tribolium\_castaneum tr|A3RE84|A3RE84\_TRICA

Alignment statistics for match #1

| Score         | Expect                                                       | Method                       | Identities   | Positives    | Gaps      | Frame |
|---------------|--------------------------------------------------------------|------------------------------|--------------|--------------|-----------|-------|
| 261 bits(668) | 9e-76                                                        | Compositional matrix adjust. | 124/171(73%) | 148/171(86%) | 2/171(1%) | +1    |
| Query 8       | QMDISENSTYLFDKHEDRNN--TDRDENLARVEVATLAIIFLVTVIGNSTVLLALWTRRR |                              | 65           |              |           |       |
|               | +M+ S N+ L+ D N ++RDENLA++E+A L +IF+VTV+GNS VLLALWTRR        |                              |              |              |           |       |
| Sbjct 4171    | RMNFSVNNQSLYQPFQDVENVLSERDENLAKIEIAILIVIFIVTVLGNISVLLALWTRRI |                              | 4350         |              |           |       |
| Query 66      | YAGRKKLSRMYFFILHLSIADLITAFLSVLPQLAWDITYRFYGGFLLCKVVKYQQTLPY  |                              | 125          |              |           |       |
|               | YAGRKKLSRMYFFILHLSIADL+TA LS LPQLAWDIT+RF GG+LLCK+VK+GQ LGPY |                              |              |              |           |       |
| Sbjct 4351    | YAGRKKLSRMYFFILHLSIADLVTALLSDLPQLAWDITFRFKGGWLLCKIVKFGQLLPY  |                              | 4530         |              |           |       |
| Query 126     | LSSYVLMATAIDRHQAICYPLTYCSWTSRRSKVMVYLAWVASLAFQIPQLT 176      |                              |              |              |           |       |
|               | LSSY+LMATA+DR+QAICYPLTYCSWTSRRSK+MV+ AW+ SL FCIPQ+T          |                              |              |              |           |       |
| Sbjct 4531    | LSSYILMATAVDRYQAICYPLTYCSWTSRRSKLMVWTAWITSLIFCIPQVT 4683     |                              |              |              |           |       |

**Anoplophora glabripennis** Contig68241, whole genome shotgun sequence

Sequence ID: [gb|AQHT01068175.1|](#)Length: 5957

Number of Matches: 1

Range 1: 583 to 921 [GenBankGraphics](#)

Query: Tribolium\_castaneum tr|A3RE84|A3RE84\_TRICA

Alignment statistics for match #1

| Score         | Expect                                                      | Method                       | Identities  | Positives    | Gaps      | Frame |
|---------------|-------------------------------------------------------------|------------------------------|-------------|--------------|-----------|-------|
| 214 bits(546) | 2e-59                                                       | Compositional matrix adjust. | 99/113(88%) | 109/113(96%) | 0/113(0%) | +1    |
| Query 65      | RYAGRKKLSRMYFFILHLSIADLITAFLSVLPQLAWDITYRFYGGFLLCKVVKYQQTLP |                              | 124         |              |           |       |
|               | RYAGRKKLSRMYFFILHLSIADLITAF+ LPQLAWDIT+RF GGF +CKVVKYQQTLP  |                              |             |              |           |       |
| Sbjct 583     | RYAGRKKLSRMYFFILHLSIADLITAF+LPQLAWDITFRFQGGFFMCKVVKYQQTLP   |                              | 762         |              |           |       |
| Query 125     | YLSSYVLMATAIDRHQAICYPLTYCSWTSRRSKVMVYLAWVASLAFQIPQLTI 177   |                              |             |              |           |       |
|               | YLSSY+LMATA+DRHQAICYPLTYCSWTSRRSKVMVYLAW+L FCIPQ+++         |                              |             |              |           |       |
| Sbjct 763     | YLSSYILMATAVDRHQAICYPLTYCSWTSRRSKVMVYLAWMAALLFCIPQVSV 921   |                              |             |              |           |       |

**Leptinotarsa decemlineata** Contig191282, whole genome shotgun sequence

Sequence ID: [gb|AYNB01191279.1|](#)Length: 2693

Number of Matches: 1

Range 1: 387 to 725 [GenBankGraphics](#)

Query: Tribolium\_castaneum tr|A3RE84|A3RE84\_TRICA

Alignment statistics for match #1

| Score         | Expect                                                          | Method                       | Identities  | Positives    | Gaps      | Frame |
|---------------|-----------------------------------------------------------------|------------------------------|-------------|--------------|-----------|-------|
| 204 bits(520) | 1e-56                                                           | Compositional matrix adjust. | 97/113(86%) | 103/113(91%) | 0/113(0%) | -1    |
| Query 65      | RYAGRKKLSRMYFFILHLSIADLITAFLSVLPQLAWDITYRFYGGFLLCKVVKYQQTLP     |                              | 124         |              |           |       |
|               | RY GRKKLSRMYFFILHLSIADLITAF+L SVL QL WDITYRF GG LCK VKYQQTLP    |                              |             |              |           |       |
| Sbjct 725     | RYTGRKKLSRMYFFILHLSIADLITAF+L SVL TQLGWDITYRFKGGNFLLCKSVKYQQTLP |                              | 546         |              |           |       |
| Query 125     | YLSSYVLMATAIDRHQAICYPLTYCSWTSRRSKVMVYLAWVASLAFQIPQLTI 177       |                              |             |              |           |       |
|               | YLSSY+L+ATA+DRHQAICYPLTYCSWTSRRSKVMVY+AW SL FCIPQ+++            |                              |             |              |           |       |
| Sbjct 545     | YLSSYILVATALDRHQAICYPLTYCSWTSRRSKVMVYIAWTVSLIFCIPQVSI 387       |                              |             |              |           |       |

**Hypothenemus hampei** scaffold1221, whole genome shotgun sequence

Sequence ID: [gb|LBGY01001191.1|](#)Length: 69032

Number of Matches: 5

Range 1: 61624 to 61809 [GenBankGraphics](#)

Query: Tribolium\_castaneum tr|A3RE84|A3RE84\_TRICA

Alignment statistics for match #1

| Score         | Expect                                                      | Method                       | Identities | Positives  | Gaps     | Frame |
|---------------|-------------------------------------------------------------|------------------------------|------------|------------|----------|-------|
| 114 bits(286) | 3e-25                                                       | Compositional matrix adjust. | 52/62(84%) | 57/62(91%) | 0/62(0%) | -3    |
| Query 117     | KYGQTLGPYLSYVLMATAIDRHQAICYPLTYCSWTSRRSKVMVYLAWVASLAFQIPQLT |                              | 176        |            |          |       |
|               | +YGQTLGPYLSYVLMATAIDRHQAICYPLTYCSWTSRRSKVM+Y+AW+ L CIPQ+    |                              |            |            |          |       |
| Sbjct 61809   | QYGQTLGPYLSYVLMATAIDRHQAICYPLTYCSWTSRRSKVMYVAVIVGLLCCIPQVN  |                              | 61630      |            |          |       |
| Query 177     | IF 178                                                      |                              |            |            |          |       |
|               | IF                                                          |                              |            |            |          |       |
| Sbjct 61629   | IF 61624                                                    |                              |            |            |          |       |

Range 2: 59610 to 59918 [GenBankGraphics](#)

Alignment statistics for match #2

| Score         | Expect                                                      | Method                       | Identities  | Positives   | Gaps      | Frame |
|---------------|-------------------------------------------------------------|------------------------------|-------------|-------------|-----------|-------|
| 112 bits(279) | 2e-24                                                       | Compositional matrix adjust. | 65/103(63%) | 83/103(80%) | 2/103(1%) | -1    |
| Query 207     | YSISVFMVPLVLIIFTYTSICIEIWqsesslrprssqksAPGKR--TPLISRAKINTVK |                              | 264         |             |           |       |
|               | YS+++F++PL+VL++TY+ IC BIW+ S+SSLRPR+ K KR PLISRAKINTVK      |                              |             |             |           |       |
| Sbjct 59918   | YSLTIFIPLLVVYTYSCICREIWRCSDDSLRPRNMSKQIATKRDRVPLISRAKINTVK  |                              | 59739       |             |           |       |
| Query 265     | QTIIVIMYIACSTPPFILAQLWATWDPQSPFIDGPVVFVILTL 307             |                              |             |             |           |       |
|               | QT+AVIVMYI CSTPFI++QLWAT DP S F++G F + TLL                  |                              |             |             |           |       |
| Sbjct 59738   | QTVAVIVMYIVCSTPFIIVSQLWATIDPTSSFFLEGKNFVFTLL 59610          |                              |             |             |           |       |



Range 3: 62170 to 62328[GenBankGraphics](#)

Alignment statistics for match #3

| Score          | Expect                                               | Method                       | Identities | Positives  | Gaps     | Frame |
|----------------|------------------------------------------------------|------------------------------|------------|------------|----------|-------|
| 96.7 bits(239) | 2e-19                                                | Compositional matrix adjust. | 44/53(83%) | 48/53(90%) | 0/53(0%) | -3    |
| Query 65       | RYAGRKLSRMYFFILHLSIADLITAFLSVLPQLAWDITYRFYGGFLLCKVVK |                              | 117        |            |          |       |
|                | RY GRKLSRMYFFILHLSIADLI AF SVLPQLAW++T+RF GGF+LCK VK |                              |            |            |          |       |
| Sbjct 62328    | RYCGRKLSRMYFFILHLSIADLIVAFPSVLPQLANEVTFRFQGGFLLCKFVK |                              | 62170      |            |          |       |

Range 4: 54000 to 54143[GenBankGraphics](#)

Alignment statistics for match #4

| Score          | Expect                                           | Method                       | Identities | Positives  | Gaps     | Frame |
|----------------|--------------------------------------------------|------------------------------|------------|------------|----------|-------|
| 77.4 bits(189) | 5e-13                                            | Compositional matrix adjust. | 35/48(73%) | 41/48(85%) | 0/48(0%) | -1    |
| Query 295      | FIDGPFVILITLLYSLNSCVNPWIYLFNRELPRLLLRHYTASSKNYR  |                              | 342        |            |          |       |
|                | + G F ILTLLYSLNSCVNPWIYLFNRELPRLLLRHYTASSKNYR    |                              |            |            |          |       |
| Sbjct 54143    | LLAGTFPFTILTLLYSLNSCVNPWIYLFNRELPRLLLRHYTASSKNYR |                              | 54000      |            |          |       |

Range 5: 61006 to 61104[GenBankGraphics](#)

Alignment statistics for match #5

| Score          | Expect                            | Method                       | Identities | Positives  | Gaps     | Frame |
|----------------|-----------------------------------|------------------------------|------------|------------|----------|-------|
| 45.1 bits(105) | 0.007                             | Compositional matrix adjust. | 17/33(52%) | 23/33(69%) | 0/33(0%) | -3    |
| Query 175      | LTIFTYTSVGEDEYDCWATFQEPWPKRAYVTWY |                              | 207        |            |          |       |
|                | + IF+Y V YDCWATF + WG++AYV W+     |                              |            |            |          |       |
| Sbjct 61104    | VIIFSYQEVAGHTYDCWATFNKEWGEQAYVIWF |                              | 61006      |            |          |       |

**Supplementary Table S1. List of analysed arthropod species**

| Subphylum or Order <sup>a</sup> | #  | #                                | Species                         | Oxytocin-like peptide neurophysin domain (+) | Oxytocin-like precursor ID       | Oxytocin-like receptor (+) <sup>b</sup> | Oxytocin-like receptor ID                                                                  | Systematics (from NCBI)                                                                                                              | Common name     |
|---------------------------------|----|----------------------------------|---------------------------------|----------------------------------------------|----------------------------------|-----------------------------------------|--------------------------------------------------------------------------------------------|--------------------------------------------------------------------------------------------------------------------------------------|-----------------|
| <b>Chelicerata</b>              | 1  | 1                                | <i>Limulus polyphemus</i>       | CFITNCPG                                     | 926609726                        | +++                                     | 926615389;<br>926636334;<br>926627326                                                      | Merostomata; Xiphosura;<br>Limulidae                                                                                                 | horseshoe crabs |
|                                 | 2  | 2                                | <i>Ixodes scapularis</i>        | CFITNCPG                                     | AGM20426.1                       | +++                                     | 215501697;<br>215501196;<br>215493320                                                      | Arachnida; Acari; Parasitiforme ;<br>Ixodida; Ixodoidea; Ixodidae;<br>Ixodinae                                                       | mites, ticks    |
|                                 | 3  | 3                                | <i>Ixodes ricinus</i>           | CFITNCPG                                     | 807918304                        | +                                       | 1016843980                                                                                 | Arachnida; Acari; Parasitiformes;<br>Ixodida; Ixodoidea; Ixodidae;<br>Ixodinae                                                       |                 |
|                                 | 4  | 4                                | <i>Rhipicephalus microplus</i>  | CFITNCPG                                     | ADMZ02000298.1                   |                                         |                                                                                            | Arachnida; Acari; Parasitiformes;<br>Ixodida; Ixodoidea; Ixodidae;<br>Rhipicephalinae                                                |                 |
|                                 | 5  | 5                                | <i>Ornithodoros turicata</i>    |                                              |                                  | +                                       | GDIE01074084.1                                                                             | Arachnida; Acari; Parasitiformes;<br>Ixodida; Ixodoidea; Argasidae                                                                   |                 |
|                                 | 6  | 6                                | <i>Metaseiulus occidentalis</i> | CFITNCPG                                     | 391348425                        | ++                                      | 391328891;<br>391341506                                                                    | Arachnida; Acari; Parasitiformes;<br>Mesostigmata; Gamasina;<br>Phytoseioidea; Phytoseiidae;<br>Typhlodrominae                       |                 |
|                                 | 7  | 7                                | <i>Varroa destructor</i>        | CFITNCPG                                     | ADDG01001370.1                   | ++                                      | ADDG01054890.1;<br>ADDG01034892.1                                                          | Arachnida; Acari; Parasitiformes;<br>Mesostigmata; Gamasina;<br>Dermanysoidea; Varroidae                                             |                 |
|                                 | 8  | 8                                | <i>Panonychus ulmi</i>          |                                              |                                  | +                                       | GCAC01000419.1                                                                             | Arachnida; Acari; Acariiformes;<br>Trombidiformes; Prostigmata;<br>Eleutherengona;<br>Raphignathae; Tetranychoidae;<br>Tetranychidae |                 |
|                                 | 9  | 9                                | <i>Tetranychus urticae</i>      | CFITNCPG                                     | 1005954275                       | +                                       | 1005961572                                                                                 | Arachnida; Acari; Acariiformes;<br>Trombidiformes; Prostigmata;<br>Eleutherengona; Raphignathae;<br>Tetranychoidae; Tetranychidae    |                 |
|                                 | 10 | 10                               | <i>Dermatophagoides farinae</i> | CFITNCPRA                                    | ASGP01007982.1                   | +                                       | ASGP01005815.1                                                                             | Arachnida; Acari; Acariiformes;<br>Sarcoptiformes; Astigmata;<br>Psoroptidia; Analgoidea;<br>Pyroglyphidae;<br>Dermatophagoidinae    |                 |
|                                 | 11 | 11                               | <i>Sarcoptes scabiei</i>        | CFITNCPA                                     | KPL97556.1                       | +                                       | gbJXLN01017957.1                                                                           | Arachnida; Acari; Acariiformes;<br>Sarcoptiformes; Astigmata;<br>Psoroptidia; Sarcoptoidea;<br>Sarcoptidae; Sarcoptinae              |                 |
|                                 | 12 | 12                               | <i>Hypochothonius rufulus</i>   | CFITNCPG                                     | LBFL01028909.1                   | +                                       | LBFL01050327.1                                                                             | Arachnida; Acari; Acariiformes;<br>Sarcoptiformes; Oribatida;<br>Enarthronota; Hypochothoidea;<br>Hypochothoniidae                   |                 |
|                                 | 13 | 13                               | <i>Achipteria coleoptrata</i>   | CFITNCPG                                     | LBFM01000221.1                   | ++                                      | LBFM01000129.1;<br>5981-6625;<br>LBFM01004763.1                                            | Arachnida; Acari; Acariiformes;<br>Sarcoptiformes; Oribatida;<br>Brachypylina; Achipterioidea;<br>Achipteriidae                      |                 |
|                                 | 14 | 14                               | <i>Platynothrus peltifer</i>    | CFITNCPG                                     | LBFO01089471.1                   | +++++                                   | LBFO01084717.1;<br>LBFO01069293.1;<br>LBFO01087167.1;<br>LBFO01104342.1,<br>LBFO01089844.1 | Arachnida; Acari; Acariiformes;<br>Sarcoptiformes; Oribatida;<br>Desmonomata; Crotonioidea;<br>Camisiidae                            |                 |
|                                 | 15 | 15                               | <i>Steganacarus magnus</i>      | CFITNCPG                                     | LBFN01029022.1                   | +                                       | LBFN01047006.1                                                                             | Arachnida; Acari; Acariiformes;<br>Sarcoptiformes; Oribatida;<br>Mixonomata; Phthiracaroidae;<br>Steganacaridae                      |                 |
| 16                              | 16 | <i>Centruroides exilicauda</i>   | CFITNCPG                        | AXZI01013139.1                               | +                                | AXZI01023310.1                          | Arachnida; Scorpiones; Buthida;<br>Buthoidea; Buthidae                                     | scorpions                                                                                                                            |                 |
| 17                              | 17 | <i>Mesobuthus martensii</i>      | CFITNCPG                        | AYEL01091269.1                               | +                                | AYEL01079865.1                          | Arachnida; Scorpiones; Buthida;<br>Buthoidea; Buthidae                                     |                                                                                                                                      |                 |
| 18                              | 18 | <i>Loxosceles reclusa</i>        |                                 |                                              |                                  |                                         | Arachnida; Araneae;<br>Araneomorphae; Haplogynae;<br>Sicariidae                            | spiders                                                                                                                              |                 |
| 19                              | 19 | <i>Latrodectus hesperus</i>      |                                 |                                              |                                  |                                         | Arachnida; Araneae;<br>Araneomorphae; Entelegynae;<br>Araneioidea; Theridiidae             |                                                                                                                                      |                 |
| 20                              | 20 | <i>Parasteatoda tepidariorum</i> |                                 |                                              |                                  |                                         | Arachnida; Araneae;<br>Araneomorphae; Entelegynae;<br>Araneioidea; Theridiidae             |                                                                                                                                      |                 |
| 21                              | 21 | <i>Stegodyphus mimosarum</i>     |                                 |                                              |                                  |                                         | Arachnida; Araneae;<br>Araneomorphae; Entelegynae;<br>Eresoidea; Eresidae                  |                                                                                                                                      |                 |
| <b>Myriapoda</b>                | 22 | 1                                | <i>Symphylella vulgaris</i>     | CFITNCPG                                     | GAKX01066982.1                   |                                         |                                                                                            | Symphyla; Scolopendrellidae                                                                                                          | milipedes       |
|                                 | 23 | 2                                | <i>Strigamia maritima</i>       | CYITNCPG                                     | AFFK01014417.1;1<br>57792-158367 | ++                                      | AFFK01021536.1; <br>6079-6519;6079-                                                        | Chilopoda; Pleurostigmophora;<br>Epimorpha; Geophilomorpha;                                                                          | centipedes      |

|                    |    |    |                                    |                        |                                                         |                                                                                                                                            |                                    |
|--------------------|----|----|------------------------------------|------------------------|---------------------------------------------------------|--------------------------------------------------------------------------------------------------------------------------------------------|------------------------------------|
|                    |    |    |                                    |                        | 6519;<br>AFFK01021536:22<br>344-23360;25188-<br>25421   | Linotaeniidae                                                                                                                              |                                    |
|                    | 24 | 3  | <i>Scolopendra subspinipes</i>     | CFITNCPG<br>CYIINCIDND | GBIM01005348.1;<br>GBIM01002605.1                       | Chilopoda; Pleurostigmophora;<br>Epimorpha; Scolopendromorpha;<br>Scolopendridae                                                           |                                    |
|                    | 25 | 4  | <i>Lithobius forficatus</i>        | CFITNCPG               | 679426463                                               | Chilopoda; Pleurostigmophora;<br>Lithobiomorpha; Lithobiidae;<br>Lithobius                                                                 |                                    |
|                    | 26 | 5  | <i>Glomeris pustulata</i>          |                        |                                                         | Diplopoda; Pentazonia;<br>Glomerida; Glomeridae                                                                                            |                                    |
| <b>Crustaceans</b> | 27 | 1  | <i>Cypridina sp.</i>               |                        |                                                         | Ostracoda; Myodocopa;<br>Myodocopida; Cypridinoidea;<br>Cypridinidae                                                                       | mussels,<br>shrimps<br>crabs,      |
|                    | 28 | 2  | <i>Sarsinebalia urgorrii</i>       |                        |                                                         | Malacostraca; Phyllocarida;<br>Leptostraca; Nebaliidae                                                                                     | lobsters,<br>crayfish,<br>shrimps, |
|                    | 29 | 3  | <i>Hyalella azteca</i>             |                        |                                                         | Malacostraca; Eumalacostraca;<br>Peracarida; Amphipoda;<br>Senticaudata; Talitrida Talitroidea;<br>Hyalellidae                             | krill,<br>woodlice                 |
|                    | 30 | 4  | <i>Parhyale hawaiensis</i>         |                        |                                                         | Malacostraca; Eumalacostraca;<br>Peracarida; Amphipoda;<br>Senticaudata; Talitrida Talitroidea;<br>Hyalidae                                |                                    |
|                    | 31 | 5  | <i>Litopenaeus vannamei</i>        | CFITNCPG               | JP362883.1                                              | Malacostraca; Eumalacostraca;<br>Eucarida; Decapoda;<br>Dendrobranchiata;<br>Penaeoidea Penaeidae                                          |                                    |
|                    | 32 | 6  | <i>Celuca pugilator</i>            |                        |                                                         | Malacostraca; Eumalacostraca; Euc<br>arida; Decapoda;<br>Pleocyemata; Brachyura;<br>Eubranchyura; Thoracotremata;<br>Ocyropodoidea         |                                    |
|                    | 33 | 7  | <i>Scylla paramamosain</i>         | +                      | ALQ28600.1                                              | Malacostraca; Eumalacostraca;<br>Eucarida; Decapoda; Pleocyemata;<br>Brachyura; Eubranchyura;<br>Heterotremata; Portunoidea;<br>Portunidae |                                    |
|                    | 34 | 8  | <i>Homarus americanus</i>          | CFITNCPG               | GEBG01052869.1;<br>GEBG01052869.1                       | Malacostraca; Eumalacostraca;<br>Eucarida; Decapoda; Pleocyemata;<br>Astacidea; Nephropoidea;<br>Nephropidae                               |                                    |
|                    | 35 | 9  | <i>Triops cancriformis</i>         | CFITNCPG               | 787010878:2475-<br>2558                                 | Branchiopoda; Phyllopoidea;<br>Notostraca; Triopsidae                                                                                      | shrimps                            |
|                    | 36 | 10 | <i>Daphnia magna</i>               | CFITNCPG               | JAK93241.1                                              | Branchiopoda; Phyllopoidea;<br>Diplostraca; Cladocera;<br>Anomopoda; Daphniidae                                                            |                                    |
|                    | 37 | 11 | <i>Daphnia pulex</i>               | CFITNCPG               | EFX71881.1                                              | Branchiopoda; Phyllopoidea;<br>Diplostraca; Cladocera;<br>Anomopoda; Daphniidae                                                            |                                    |
|                    | 38 | 12 | <i>Tigriopus californicus</i>      | CFITNCPG               | GBSZ01008472.1                                          | Maxillopoidea; Copepoda;<br>Neocopepoda; Podoplea;<br>Harpacticoida; Harpacticidae                                                         | barnacles,<br>copepods             |
|                    | 39 | 13 | <i>Caligus rogercresseyi</i>       | CFITNCPV<br>S          | GAZX01009828.1                                          | Maxillopoidea; Copepoda;<br>Neocopepoda; Sodoplea;<br>Siphonostomatoida; Caligidae                                                         |                                    |
|                    | 40 | 14 | <i>Lepeophtheirus salmonis</i>     | CFITNCPV<br>G          | JAJ41077.1;<br>JAN78479.1;<br>JAK30878.1;<br>JAM92944.1 | Maxillopoidea; Copepoda;<br>Neocopepoda; Podoplea;<br>Siphonostomatoida; Caligidae                                                         |                                    |
|                    | 41 | 13 | <i>Calanus finmarchicus</i>        | CFISNCPV<br>S          | GAXK01089312.1;<br>GAXK01048248.1;<br>GBFB01189857.1    | Maxillopoidea; Copepoda;<br>Neocopepoda; Gymnople;<br>Calanoida; Calanidae                                                                 |                                    |
|                    | 42 | 14 | <i>Eurytemora affinis</i>          |                        |                                                         | Maxillopoidea; Copepoda;<br>Neocopepoda; Gymnople;<br>Calanoida; Temoridae                                                                 |                                    |
|                    | 43 | 15 | <i>Speleonectes cf. tulumensis</i> | CFILDCPLM              | JL155260.1                                              | Remipedia; Nectiopoidea;<br>Speleonectidae                                                                                                 |                                    |
| <b>Protura</b>     | 44 | 1  | <i>Acerentomon sp.</i>             |                        |                                                         | Acerentomata; Acerentomidae                                                                                                                |                                    |
| <b>Collembola</b>  | 45 | 1  | <i>Sminthurus viridis</i>          | CFITNCPG               | GATZ01101765.1                                          | Symphyleona; Sminthuridae                                                                                                                  |                                    |
|                    | 46 | 2  | <i>Tetradontophora bielensis</i>   | +                      | GAXI01072001.1                                          | Poduromorpha; Poduroidea;<br>Onychiuridae; Tetradontophorinae                                                                              |                                    |
|                    | 47 | 3  | <i>Anurida maritima</i>            | CFITNCPG               | GAUE01051410.1                                          | Poduromorpha; Poduroidea;<br>Neanuridae; Pseudachorutinae                                                                                  |                                    |
|                    | 48 | 4  | <i>Pogonognathellus sp.</i>        | CFITNCPG               | GATD01083368.1                                          | Entomobryomorpha;<br>Tomoceridae                                                                                                           |                                    |
|                    | 49 | 5  | <i>Folsomia candida</i>            | CFITNCPG               | GASX01087107.1                                          | Entomobryomorpha; Isotomoidea;<br>Isotomidae; Proisotominae                                                                                |                                    |
| <b>Diplura</b>     | 50 | 1  | <i>Campodea augens</i>             | +                      | GAYN01126761.1                                          | Rhabdura; Campodeoidea;<br>Campodeidae                                                                                                     |                                    |

|                         |    |   |                                      |           |                                   |   |                                   |                                                                  |
|-------------------------|----|---|--------------------------------------|-----------|-----------------------------------|---|-----------------------------------|------------------------------------------------------------------|
|                         | 51 | 2 | <i>Catajapyx aquilonaris</i>         | CFITNCPG  | JYFJ01031256.1                    | + | JYFJ01023801.1                    | Dicellurata; Japygoidea; Japygidae; Japyginae                    |
|                         | 52 | 3 | <i>Occasjapyx japonicus</i>          | CFITNCPG  | GAXJ01105745.1                    | + | GAXJ01102351.1                    | Dicellurata; Japygoidea; Japygidae; Japyginae                    |
| <b>Archaeognatha</b>    | 53 | 1 | <i>Meinertellus cundinamarcensis</i> | CFITNCPG  | GAUG01237411.1                    | + | GAUG01249614.1                    | Meinertellidae                                                   |
|                         | 54 | 2 | <i>Machilis hrabei</i>               | CFITNCPG  | GAUM01180328.1                    | + | GAUM01006385.1                    | Machilidae                                                       |
| <b>Zygentoma</b>        | 55 | 1 | <i>Tricholepidion gertschi</i>       | CFITNCPG  | GASO01245888.1                    | + | GASO01213666.1                    | Lepidotrichidae                                                  |
|                         | 56 | 2 | <i>Thermobia domestica</i>           |           |                                   |   |                                   | Lepismatidae                                                     |
|                         | 57 | 3 | <i>Atelura formicaria</i>            | CFITNCPG  | GAYJ01010327.1;<br>GAYJ01211146.1 |   |                                   | Nicoletidae                                                      |
| <b>Odonata</b>          | 58 | 1 | <i>Calopteryx splendens</i>          |           |                                   |   |                                   | Zygoptera; Calopterygoidea; Calopterygidae; Calopteryx           |
|                         | 59 | 2 | <i>Cordulegaster boltonii</i>        |           |                                   | + | GAYO01131401.1                    | Anisoptera; Cavilabiata; Cordulegastridae                        |
|                         | 60 | 3 | <i>Ladona fulva</i>                  | CFITNCPG  | APVN01010136.1                    | + | APVN01071783.1;<br>APVN01071781.1 | Anisoptera; Libellulidae                                         |
|                         | 61 | 4 | <i>Epiophlebia superstes</i>         |           |                                   | + | GAVW01126771.1                    | Anisozygoptera; Epiophlebiidae                                   |
| <b>Ephemeroptera</b>    | 62 | 1 | <i>Baetis sp.</i>                    | +         | GATU01026804.1                    | + | GATU01012660.1                    | Pisciforma                                                       |
|                         | 63 | 2 | <i>Isonychia bicolor</i>             | +         | GAXA01082263.1                    | + | GAXA01009774.1                    | Setisura; Isonychiidae                                           |
|                         | 64 | 3 | <i>Eurylophella sp.</i>              | CFITNCPG  | GAZG01089132.1                    | + | GAZG01097604.1                    | Furcatergalia; Pannota; Ephemerelloidea; Ephemerellidae          |
|                         | 65 | 4 | <i>Ephemera danica</i>               | CFITNCPG  | AYNC01016661.1                    | + | AYNC01080313.1                    | Scaphodonta; Ephemeridae                                         |
| <b>Zoraptera</b>        | 66 | 1 | <i>Zorotypus caudelli</i>            |           |                                   | + | GAYA01146842.1                    | Zorotypidae                                                      |
| <b>Dermaptera</b>       | 67 | 1 | <i>Forficula auricularia</i>         |           |                                   |   |                                   | Forficulina; Forficuloidea; Forficulidae                         |
|                         | 68 | 2 | <i>Apachys chartaceus</i>            | CLITNCPKG | GAUW01104117.1                    | + |                                   | Forficulina; Apachyoidea; Apachyidae                             |
| <b>Plecoptera</b>       | 69 | 1 | <i>Leuctra sp.</i>                   |           |                                   | + | GAUF01061620.1                    | Nemouroidea; Leuctridae                                          |
|                         | 70 | 2 | <i>Perla marginata</i>               |           |                                   | + | GATV01107607.1                    | Perloidea; Perlidae                                              |
|                         | 71 | 3 | <i>Cosmioperla kuma</i>              |           |                                   |   |                                   | Eusthenioidea; Eustheniidae                                      |
| <b>Orthoptera</b>       | 72 | 1 | <i>Gryllotalpa sp.</i>               | CMIINCPRG | GAWZ01146014.1                    |   |                                   | Ensifera; Grylloidea; Gryllotalpidae                             |
|                         | 73 | 2 | <i>Teleogryllus commodus</i>         | CMIINCPRG | GBHB01042598.1                    |   |                                   | Ensifera; Grylloidea; Gryllidae                                  |
|                         | 74 | 3 | <i>Ceuthophilus sp.</i>              | +         | GAUX01264151.1                    |   |                                   | Ensifera; Rhaphidophoroidea; Rhaphidophoridae                    |
|                         | 75 | 4 | <i>Tetrix subulata</i>               |           |                                   |   |                                   | Caelifera; Tetrigoidea; Tetrigidae                               |
|                         | 76 | 5 | <i>Prosarthria teretrirostris</i>    |           |                                   |   |                                   | Caelifera; Acridomorpha; Eumastacoidea; Proscopiidae             |
|                         | 77 | 6 | <i>Locusta migratoria manilensis</i> | CLITNCPRG | GCGJ01016197.1                    |   |                                   | Caelifera; Acridomorpha; Acridoidea; Acrididae                   |
|                         | 78 | 7 | <i>Stenobothrus lineatus</i>         |           |                                   | + | GAUZ01276196.1                    | Caelifera; Acridomorpha; Acridoidea; Acrididae                   |
| <b>Mantophasmatodea</b> | 79 | 1 | <i>Tanzaniophasma sp.</i>            |           |                                   |   |                                   | Tanzaniophasmatidae                                              |
| <b>Grylloblattodea</b>  | 80 | 1 | <i>Galloisiana yuasai</i>            | CLITNCPKG | GAWN01176617.1                    | + | GAWN01106889.1                    | Grylloblattodea; Grylloblattidae                                 |
|                         | 81 | 2 | <i>Grylloblatta bifratrilecta</i>    |           |                                   |   |                                   | Grylloblattodea; Grylloblattidae                                 |
| <b>Embioptera</b>       | 82 | 1 | <i>Haploembia palaui</i>             | CLITNCPG  | GAZA01216527.1                    | + | GAZA01236978.1                    | Oligotomidae                                                     |
|                         | 83 | 2 | <i>Aposthonia japonica</i>           | CLITNCPKG | GAWU01233766.1                    | + | GAWU01020812.1                    | Oligotomidae                                                     |
| <b>Phasmatodea</b>      | 84 | 1 | <i>Timema cristinae</i>              |           |                                   |   |                                   | Timematodea; Timematoidea; Timematidae                           |
|                         | 85 | 2 | <i>Peruphasma schultei</i>           |           |                                   |   |                                   | Verophasmatodea; Areolatae; Pseudophasmatodea; Pseudophasmatidae |
|                         | 86 | 3 | <i>Aretaon asperimus</i>             |           |                                   | + | GAWC01043798.1                    | Verophasmatodea; Areolatae; Bacilloidea; Heteropterygidae        |
|                         | 87 | 5 | <i>Sipyloidea sipyulus</i>           |           |                                   | + | GAWF01069276.1                    | Verophasmatodea; Anareolatae; Diapheromeridae                    |
|                         | 88 | 4 | <i>Ramulus artemis</i>               |           |                                   | + | GAWE01092086.1                    | Verophasmatodea; Anareolatae; Phasmatidae                        |
|                         | 89 | 6 | <i>Extatosoma tiaratum</i>           |           |                                   | + | GAWG01068689.1                    | Verophasmatodea; Anareolatae; Phasmatidae                        |
|                         | 90 | 7 | <i>Medauroidea extradentata</i>      | +         | GAWD01076003.1                    | + | GAWD01027027.1                    | Verophasmatodea; Anareolatae; Phasmatidae                        |
| <b>Mantodea</b>         | 91 | 1 | <i>Metallyticus splendidus</i>       |           |                                   |   |                                   | Metallyticidae                                                   |
|                         | 92 | 2 | <i>Empusa pennata</i>                |           |                                   |   |                                   | Empusidae                                                        |

|                     |     |                                   |                                    |                                 |                                                                      |   |                             |          |                                                                         |                                                                                             |                       |
|---------------------|-----|-----------------------------------|------------------------------------|---------------------------------|----------------------------------------------------------------------|---|-----------------------------|----------|-------------------------------------------------------------------------|---------------------------------------------------------------------------------------------|-----------------------|
|                     | 93  | 3                                 | <i>Mantis religiosa</i>            |                                 |                                                                      | + | GASW01107792.1              | Mantidae |                                                                         |                                                                                             |                       |
| <b>Blattodea</b>    | 94  | 1                                 | <i>Blaberus atropos</i>            | +                               |                                                                      |   | GAYD01152108.1              | +        | GAYD01167921.1                                                          | Blaberoidea; Blaberidae                                                                     |                       |
|                     | 95  | 3                                 | <i>Blattella germanica</i>         | CLITNCPKG                       | JPZV01163469.1;<br>JPZV01163471.1                                    | + |                             |          | JPZV01131362.1;<br>JPZV01131361.1                                       | Blaberoidea; Ectobiidae                                                                     |                       |
|                     | 96  | 2                                 | <i>Periplaneta americana</i>       | +                               |                                                                      |   | GAWS01144903.1              |          |                                                                         | Blattoidea; Blattidae                                                                       |                       |
|                     | 97  | 4                                 | <i>Cryptocercus wrighti</i>        | CLITNCPKG                       |                                                                      |   | GAZN01121910.1              |          |                                                                         | Blattoidea; Cryptocercidae                                                                  |                       |
| <b>Isoptera</b>     | 98  | 1                                 | <i>Mastotermes darwiniensis</i>    |                                 |                                                                      |   |                             |          |                                                                         | Mastotermitidae                                                                             |                       |
|                     | 99  | 2                                 | <i>Prorhinotermes simplex</i>      | +                               |                                                                      |   | GASE02010515.1              |          |                                                                         | Rhinotermitidae                                                                             |                       |
|                     | 100 | 3                                 | <i>Nasutitermes exitiosus</i>      |                                 |                                                                      |   |                             |          |                                                                         | Termitidae                                                                                  |                       |
|                     | 101 | 4                                 | <i>Zootermopsis nevadensis</i>     | CLITNCPKG                       | GCA_000696155.1<br>:scaffold412:22921:<br>25055:1<br>gene:L798_08907 | + |                             |          | KDQ65295:16-501                                                         | Termopsidae                                                                                 |                       |
| <b>Thysanoptera</b> | 102 | 1                                 | <i>Gynaikothrips ficorum</i>       | CLITNCPKG                       |                                                                      |   | GAXG01236909.1              |          |                                                                         | Tubulifera; Phlaeothripodea                                                                 |                       |
|                     | 103 | 2                                 | <i>Frankliniella occidentalis</i>  | +                               |                                                                      |   | JMDY01016652.1];<br>503-766 | +        | JMDY01025147.1]                                                         | Terebrantia; Thripodea; Thripidae                                                           |                       |
|                     | 104 | 3                                 | <i>Frankliniella cephalica</i>     |                                 |                                                                      |   |                             | +        | GAYE01097758.1                                                          | Terebrantia; Thripodea; Thripidae                                                           |                       |
|                     | 105 | 4                                 | <i>Thrips palmi</i>                |                                 |                                                                      |   |                             |          |                                                                         | Terebrantia; Thripodea;Thripidae                                                            |                       |
| <b>Hemiptera</b>    | 106 | 1                                 | <i>Acanthosuarina muellerianae</i> |                                 |                                                                      |   |                             | +        | GAYY01128821.1                                                          | Sternorrhyncha; Psylliformes;<br>Psylloidea; Psyllidae                                      | jumping<br>plant lice |
|                     | 107 | 2                                 | <i>Diaphorina citri</i>            | CLINNCPTG                       | AWGM01069842.1                                                       | + |                             |          | XM_008483692.1                                                          | Sternorrhyncha; Psylliformes;<br>Psylloidea; Psyllidae                                      |                       |
|                     | 108 | 3                                 | <i>Pachypsylla venusta</i>         | CLISNCPKG                       | AZLD01215249.1                                                       | + |                             |          | AZLD01271666.1;<br>AZLD01292216.1;<br>gb AZLD01271660<br>.1             | Sternorrhyncha; Psylliformes;<br>Psylloidea; Psyllidae                                      |                       |
|                     | 109 | 4                                 | <i>Trialeurodes vaporariorum</i>   |                                 |                                                                      |   |                             |          |                                                                         | Sternorrhyncha; Aleyrodiformes;<br>Aleyrodoidea; Aleyrodidae;<br>Aleyrodinae                | white flies           |
|                     | 110 | 5                                 | <i>Bemisia tabaci</i>              |                                 |                                                                      |   |                             |          |                                                                         | Sternorrhyncha; Aleyrodiformes;<br>Aleyrodoidea; Aleyrodidae;<br>Aleyrodinae                |                       |
|                     | 111 | 6                                 | <i>Pseudococcus longispinus</i>    |                                 |                                                                      |   |                             |          |                                                                         | Sternorrhyncha; Aphidiformes;<br>Coccoidea; Pseudococcidae                                  | scale insects         |
|                     | 112 | 7                                 | <i>Maconellicoccus hirsutus</i>    |                                 |                                                                      |   |                             |          |                                                                         | Sternorrhyncha; Aphidiformes;<br>Coccoidea; Pseudococcidae                                  |                       |
|                     | 113 | 8                                 | <i>Ferrisia virgata</i>            |                                 |                                                                      |   |                             |          |                                                                         | Sternorrhyncha; Aphidiformes;<br>Coccoidea; Pseudococcidae                                  |                       |
|                     | 114 | 9                                 | <i>Trionymus perrisii</i>          |                                 |                                                                      |   |                             |          |                                                                         | Sternorrhyncha; Aphidiformes;<br>Coccoidea; Pseudococcidae                                  |                       |
|                     | 115 | 10                                | <i>Paracoccus marginatus</i>       |                                 |                                                                      |   |                             |          |                                                                         | Sternorrhyncha; Aphidiformes;<br>Coccoidea; Pseudococcidae                                  |                       |
|                     | 116 | 11                                | <i>Planococcus citri</i>           |                                 |                                                                      |   |                             |          |                                                                         | Sternorrhyncha; Aphidiformes;<br>Coccoidea; Pseudococcidae                                  |                       |
|                     | 117 | 12                                | <i>Dactylopius coccus</i>          |                                 |                                                                      |   |                             |          |                                                                         | Sternorrhyncha; Aphidiformes;<br>Coccoidea; Dactylopiidae                                   |                       |
| 118                 | 13  | <i>Essigella californica</i>      |                                    |                                 |                                                                      |   |                             |          | Sternorrhyncha; Aphidiformes;<br>Aphidoidea; Lachnidae                  | aphids                                                                                      |                       |
| 119                 | 14  | <i>Diuraphis noxia</i>            |                                    |                                 |                                                                      |   |                             |          | Sternorrhyncha; Aphidiformes;<br>Aphidoidea; Aphididae;<br>Macrosiphini |                                                                                             |                       |
| 120                 | 15  | <i>Acyrtosiphon pisum</i>         |                                    |                                 |                                                                      |   |                             |          | Sternorrhyncha; Aphidiformes;<br>Aphidoidea; Aphididae;<br>Macrosiphini |                                                                                             |                       |
| 121                 | 16  | <i>Aphis gossypii</i>             |                                    |                                 |                                                                      |   |                             |          | Sternorrhyncha; Aphidiformes;<br>Aphidoidea; Aphididae; Aphidini        |                                                                                             |                       |
| 122                 | 17  | <i>Velia caprai</i>               |                                    |                                 |                                                                      |   |                             |          | Heteroptera; Gerromorpha;<br>Gerroidea; Veliidae; Veliinae              | bugs                                                                                        |                       |
| 123                 | 18  | <i>Gerris buenoi</i>              |                                    |                                 |                                                                      |   |                             |          | Heteroptera; Gerromorpha;<br>Gerroidea; Gerridae; Gerrinae              |                                                                                             |                       |
| 124                 | 19  | <i>Oncopeltus fasciatus</i>       | +                                  |                                 |                                                                      |   | JHQO01232535.1              |          |                                                                         | Heteroptera; Panheteroptera;<br>Pentatomomorpha; Lygaeoidea;<br>Lygaeinae                   |                       |
| 125                 | 20  | <i>Piezodorus guildinii</i>       |                                    |                                 |                                                                      |   |                             |          |                                                                         | Heteroptera; Panheteroptera;<br>Pentatomomorpha; Pentamoidea;<br>Pentatomidae; Pentatominae |                       |
| 126                 | 21  | <i>Halyomorpha halys</i>          | CLITNCPKG                          | JMPT01086066.1];<br>13297-13677 | +                                                                    |   |                             |          | XP_014279829.1                                                          | Heteroptera; Panheteroptera;<br>Pentatomomorpha; Pentamoidea;<br>Pentatomidae; Pentatominae |                       |
| 127                 | 22  | <i>Acanthosoma haemorrhoidale</i> |                                    |                                 |                                                                      |   |                             |          |                                                                         | Heteroptera; Panheteroptera;<br>Pentatomomorpha; Pentamoidea;<br>Acanthosomatidae           |                       |
| 128                 | 23  | <i>Cimex lectularius</i>          |                                    |                                 |                                                                      |   |                             |          |                                                                         | Heteroptera; Panheteroptera;<br>Cimicomorpha; Cimicidae                                     |                       |
| 129                 | 24  | <i>Rhodnius prolixus</i>          |                                    |                                 |                                                                      |   |                             |          |                                                                         | Heteroptera; Panheteroptera;<br>Cimicomorpha; Reduviidae;                                   |                       |

|                    |     |    |                                    |           |                                   |   |                                   |                                                                                            |             |
|--------------------|-----|----|------------------------------------|-----------|-----------------------------------|---|-----------------------------------|--------------------------------------------------------------------------------------------|-------------|
|                    |     |    |                                    |           |                                   |   |                                   | Triatominae                                                                                |             |
|                    | 130 | 25 | <i>Notostira elongata</i>          |           |                                   |   |                                   | Heteroptera; Panheteroptera;<br>Cimicomorpha; Miridae;<br>Stenodemiini                     |             |
|                    | 131 | 26 | <i>Ranatra linearis</i>            |           |                                   |   |                                   | Heteroptera; Panheteroptera;<br>Nepomorpha; Nepidae; Ranatrinae                            |             |
|                    | 132 | 27 | <i>Xenophysella greensladeae</i>   |           |                                   |   |                                   | Coleorrhyncha; Peloridiomorpha;<br>Peloridiidae                                            | moss bugs   |
|                    | 133 | 28 | <i>Nilaparvata lugens</i>          | CLITNCPRG | AFW19795.1                        | + | BAO01091.1                        | Auchenorrhyncha; Fulgoroidea;<br>Delphacidae; Delphacinae                                  | planthopper |
|                    | 134 | 29 | <i>Homalodisca vitripennis</i>     | CLITNCPKG | JJNS01285955.1;<br>JJNS01158934.1 | + | JJNS01062030.1;<br>JJNS01434099.1 | Auchenorrhyncha; Membracoidea;<br>Cicadellidae; Cicadellinae;<br>unclassified Cicadellinae | leafhoppers |
|                    | 135 | 30 | <i>Okanagana villosa</i>           |           |                                   |   |                                   | Auchenorrhyncha; Cicadoidea;<br>Cicadidae; Tibicininae; Tibicinini                         | cicadas     |
|                    | 136 | 31 | <i>Cercopis vulnerata</i>          |           |                                   | + | GAUN01111305.1                    | Auchenorrhyncha; Cercopoidea;<br>Cercopidae;                                               | frohoppers  |
| <b>Psocodea</b>    | 137 | 1  | <i>Ectopsocus briggsi</i>          |           |                                   |   |                                   | Psocomorpha; Homilopsocidea;<br>Lachesilloidea; Ectopsocidae                               |             |
|                    | 138 | 2  | <i>Liposcelis bostrychophila</i>   | CLITNCPRG | GAYV01106698.1                    | + | GAYV01018252.1                    | Troctomorpha; Nanopsocetae;<br>Liposcelidae                                                |             |
|                    | 139 | 3  | <i>Menopon gallinae</i>            | CLITNCPRG | GAWR01010043.1                    |   |                                   | Phthiraptera; Amblycera;<br>Menoponidae                                                    |             |
|                    | 140 | 4  | <i>Pediculus humanus corporis</i>  |           |                                   |   |                                   | Phthiraptera; Anoplura;<br>Pediculidae                                                     |             |
| <b>Hymenoptera</b> | 141 | 1  | <i>Tenthredo koehleri</i>          | +         | GAWW01055882.1                    | + | GAWW01089352.1                    | Tenthredinoidea; Tenthredinidae;<br>Tenthrediniinae                                        | sawflies    |
|                    | 142 | 2  | <i>Athalia rosae</i>               | CLIINCPRG | XP_012261240.1                    | + | XP_012255235.1                    | Tenthredinoidea; Tenthredinidae;<br>Allantinae                                             |             |
|                    | 143 | 3  | <i>Neodiprion lecontei</i>         | CLIINCPRG | XP_015516596.1                    | + | LGIB01000555.1                    | Tenthredinoidea; Diprionidae;<br>Diprioninae                                               |             |
|                    | 144 | 4  | <i>Orussus abietinus</i>           | CLITNCPRG | XP_012280828.1                    | + | XP_012272252.1                    | Endopterygota; Hymenoptera;<br>Orussoidea                                                  |             |
|                    | 145 | 5  | <i>Ganaspis sp</i>                 |           |                                   | + | GAIW01017396.1                    | Symphyta; Cynipoidea; Figitidae;<br>Eucoilinae                                             | wasps       |
|                    | 146 | 6  | <i>Leptopilina bouardi</i>         |           |                                   | + | GAJA01004803.1                    | Symphyta; Cynipoidea; Figitidae;<br>Eucoilinae                                             |             |
|                    | 147 | 7  | <i>Leptopilina clavipes</i>        |           |                                   | + | GAXY01060534.1                    | Symphyta; Cynipoidea; Figitidae;<br>Eucoilinae                                             |             |
|                    | 148 | 8  | <i>Nasonia giraulti</i>            | CLITNCPRG | GBEC01021014.1                    | + | GBEC01022231.1                    | Apocrita; Chalcidoidea;<br>Pteromalidae; Pteromalinae                                      |             |
|                    | 149 | 9  | <i>Nasonia vitripennis</i>         | CLITNCPRG | XP_001606547.1                    | + | NM_001172274.1                    | Apocrita; Chalcidoidea;<br>Pteromalidae; Pteromalinae                                      |             |
|                    | 150 | 10 | <i>Nasonia longicornis</i>         | CLITNCPRG | ADAP01018019.1                    | + | ADAP01169230.1;<br>ADAP01169223.1 | Apocrita; Chalcidoidea;<br>Pteromalidae; Pteromalinae                                      |             |
|                    | 151 | 11 | <i>Trichogramma pretiosum</i>      | CLITNCPRG | XP_014226062.1                    | + | JARR01003858.1                    | Apocrita; Chalcidoidea;<br>Trichogrammatidae                                               |             |
|                    | 152 | 12 | <i>Copidosoma floridanum</i>       | CLITNCPRG | XP_014216967.1                    | + | JBOX01051729.1;<br>JBOX01051730.1 | Apocrita; Chalcidoidea;<br>Encyrtidae; Encyrtinae                                          |             |
|                    | 153 | 13 | <i>Ceratosolen solmsi marchali</i> | +         | XP_011505828.1                    |   |                                   | Apocrita; Chalcidoidea;<br>Agaonidae; Agaoninae                                            |             |
|                    | 154 | 14 | <i>Cephus cinctus</i>              | CLITNCPRG | XP_015604200.1                    | + | AMWH01000205.1                    | Apocrita; Cephoidea; Cephidae                                                              |             |
|                    | 155 | 15 | <i>Diachasma alloeum</i>           | CLITNCPRG | XP_015116397.1                    | + | LDKA01015940.1;<br>LDKA01015941.1 | Apocrita; Ichneumonoidea;<br>Braconidae; Opiinae                                           |             |
|                    | 156 | 16 | <i>Fopius arisanus</i>             | CLITNCPRG | XP_011303419.1                    | + | JRKH01003174.1                    | Apocrita; Ichneumonoidea;<br>Braconidae; Opiinae                                           |             |
|                    | 157 | 17 | <i>Microplitis demolitor</i>       | CLITNCPRG | XP_008557637.1                    | + | GAXO01007279.1                    | Apocrita; Ichneumonoidea;<br>Braconidae; Microgastrinae                                    |             |
|                    | 158 | 18 | <i>Cotesia vestalis</i>            | CLITNCPRG | GAUP01067026.1                    | + | GAUP01058790.1                    | Apocrita; Ichneumonoidea;<br>Braconidae; Microgastrinae                                    |             |
|                    | 159 | 19 | <i>Telenomus podisi</i>            | CLITNCPRG | GBEU01047114.1                    | + | GBEU01035833.1                    | Apocrita; Platygastridae;<br>Scelionidae; Telenominae                                      |             |
|                    | 160 | 20 | <i>Chrysis viridula</i>            | CLITNCPRG | GATY01003634.1                    | + | GATY01011771.1                    | Apocrita; Aculeata; Chrysididae;<br>Chrysididae; Chrysidinae                               |             |
|                    | 161 | 21 | <i>Argochrysis armilla</i>         |           |                                   | + | GAXO01007279.1                    | Apocrita; Aculeata; Chrysididae;<br>Chrysididae; Chrysidinae                               |             |
|                    | 162 | 22 | <i>Sphaerophthalma orestes</i>     |           |                                   | + | GAXP01010798.1                    | Apocrita; Aculeata; Pompiloidea;<br>Mutillidae; Sphaerophthalminae                         |             |
|                    | 163 | 23 | <i>Polistes dominula</i>           | CLITNCPRG | XP_015176922.1                    | + | LMBU01000007.1                    | Apocrita; Aculeata; Vespoidea;<br>Vespidae; Polistinae                                     |             |
|                    | 164 | 24 | <i>Polistes canadensis</i>         | CLITNCPRG | XP_014601007.1                    | + | XP_014616661.1                    | Apocrita; Aculeata; Vespoidea;<br>Vespidae; Polistinae                                     |             |
|                    | 165 | 25 | <i>Polistes metricus</i>           | CLITNCPRG | GBGV01014087.1];<br>870-1319      | + | GBGV01009051.1                    | Apocrita; Aculeata; Vespoidea;<br>Vespidae; Polistinae                                     |             |
|                    | 166 | 26 | <i>Mischocyttarus flavitarsis</i>  | CLITNCPRG | GAXM01001949.1];<br>:391-804      | + | GAXM01016032.1                    | Apocrita; Aculeata; Vespoidea;<br>Vespidae; Polistinae                                     |             |
|                    | 167 | 27 | <i>Pseudomasaris vespoides</i>     | CLITNCPRG | GAXQ01038846.1                    |   |                                   | Apocrita; Aculeata; Vespoidea;<br>Vespidae; Masarinae                                      |             |
|                    | 168 | 28 | <i>Chyphotus mellipes</i>          | CLITNCPRG | GAXL01043733.1                    | + | GAXL01018116.1                    | Apocrita; Aculeata; Vespoidea;<br>Bradynobaenidae; Chyphotinae                             |             |
|                    | 169 | 29 | <i>Brachycistis timberlakei</i>    | CLITNCPRG | GAZU01023639.1];<br>2211-2657     | + | GAZU01029175.1                    | Apocrita; Aculeata; Vespoidea;<br>Tiphidae; Brachycistidinae                               |             |

|                      |     |    |                                     |           |                                                                 |   |                                     |                                                              |      |
|----------------------|-----|----|-------------------------------------|-----------|-----------------------------------------------------------------|---|-------------------------------------|--------------------------------------------------------------|------|
|                      | 170 | 30 | <i>Crioscolia alcione</i>           | CLITNCPRG | GAXT01010223.1 <br>1-207                                        | + | GAXT01013548.1                      | Apocrita; Aculeata; Vespoidea;<br>Scoliidae                  |      |
|                      | 171 | 31 | <i>Tetramorium bicarinatum</i>      | +         | GASM01006298.1                                                  | + | GASM01007371.1                      | Apocrita; Aculeata; Vespoidea;<br>Formicidae; Myrmicinae     | ants |
|                      | 172 | 32 | <i>Wasmannia auropunctata</i>       | CLITNCPRG | XP_011702880.1                                                  | + | XM_011691615.1                      | Apocrita; Aculeata; Vespoidea;<br>Formicidae; Myrmicinae     |      |
|                      | 173 | 33 | <i>Pogonomyrmex barbatus</i>        | CLITNCPRG | XP_011645557.1                                                  | + | XP_011639495.1                      | Apocrita; Aculeata; Vespoidea;<br>Formicidae; Myrmicinae     |      |
|                      | 174 | 34 | <i>Vollenhovia emeryi</i>           | CLITNCPRG | XP_011871987.1                                                  | + | XP_011350516.1                      | Apocrita; Aculeata; Vespoidea;<br>Formicidae; Myrmicinae     |      |
|                      | 175 | 35 | <i>Acromyrmex echinator</i>         | CLITNCPRG | XP_011065328.1                                                  | + | EGI60623.1                          | Apocrita; Aculeata; Vespoidea;<br>Formicidae; Myrmicinae     |      |
|                      | 176 | 36 | <i>Atta colombica</i>               | CLITNCPRG | LKEW01016192.1                                                  | + | LKEW01024766.1                      | Apocrita; Aculeata; Vespoidea;<br>Formicidae; Myrmicinae     |      |
|                      | 177 | 37 | <i>Atta cephalotes</i>              | CLITNCPRG | XP_012061245.1                                                  | + | gb LKEW01024766<br>.1               | Apocrita; Aculeata; Vespoidea;<br>Formicidae; Myrmicinae     |      |
|                      | 178 | 38 | <i>Monomorium pharaonis</i>         | CLITNCPRG | XP_012527594.1                                                  | + | XP_012527228.1                      | Apocrita; Aculeata; Vespoidea;<br>Formicidae; Myrmicinae     |      |
|                      | 179 | 39 | <i>Trachymyrmex cornetzi</i>        | CLITNCPRG | KYN19822.1                                                      | + | LKEY01027754.1                      | Apocrita; Aculeata; Vespoidea;<br>Formicidae; Myrmicinae     |      |
|                      | 180 | 40 | <i>Trachymyrmex zeteki</i>          | CLITNCPRG | KYQ46204.1                                                      | + | LKFA01015596.1                      | Apocrita; Aculeata; Vespoidea;<br>Formicidae; Myrmicinae     |      |
|                      | 181 | 41 | <i>Trachymyrmex septentrionalis</i> | CLITNCPRG | KYN39529.1                                                      | + | LKEZ01023603.1                      | Apocrita; Aculeata; Vespoidea;<br>Formicidae; Myrmicinae     |      |
|                      | 182 | 42 | <i>Solenopsis invicta</i>           | CLITNCPRG | LJ563171.1                                                      | + | XP_011159612.1                      | Apocrita; Aculeata; Vespoidea;<br>Formicidae; Myrmicinae     |      |
|                      | 183 | 43 | <i>Cyphomyrmex costatus</i>         | CLITNCPRG | LKEX01018246.1;<br>LKEX01015288.1;<br>LKEX01011223.1            | + | gb LKEX01019312<br>.1               | Apocrita; Aculeata; Vespoidea;<br>Formicidae; Myrmicinae     |      |
|                      | 184 | 44 | <i>Lasius niger</i>                 | CLITNCPRG | LBMM01006435.1                                                  | + | LBMM01005371.1.1;<br>LBMM01020432.1 | Apocrita; Aculeata; Vespoidea;<br>Formicidae; Formicinae     |      |
|                      | 185 | 45 | <i>Camponotus floridanus</i>        | CLIVNCPRG | gnl Cflo_3.3 CFLO<br>12125-RA;<br>gnl Cflo_3.3 CFLO<br>19205-RA | + | AEAB01029474.1;<br>AEAB01029475.1   | Apocrita; Aculeata; Vespoidea;<br>Formicidae; Formicinae     |      |
|                      | 186 | 46 | <i>Harpegnathos saltator</i>        | CLITNCPRG | XP_011147500.1                                                  | + | XP_011151734.1                      | Apocrita; Aculeata; Vespoidea;<br>Formicidae; Ponerinae      |      |
|                      | 187 | 47 | <i>Dinoponera quadriceps</i>        | CLITNCPHG | XP_014485987.1                                                  | + | XP_014470481.1                      | Apocrita; Aculeata; Vespoidea;<br>Formicidae; Ponerinae      |      |
|                      | 188 | 48 | <i>Linepithema humile</i>           | CLITNCPRG | XP_012222809.1                                                  | + | ADOQ01003105.1                      | Apocrita; Aculeata; Vespoidea;<br>Formicidae; Dolichoderinae |      |
|                      | 189 | 49 | <i>Cerapachys biroi</i>             | CLITNCPRG | XP_011329433.1                                                  | + | XP_011350516.1                      | Apocrita; Aculeata; Vespoidea;<br>Formicidae; Cerapachyinae  |      |
|                      | 190 | 50 | <i>Stigmatomma oregonense</i>       |           |                                                                 | + | GAXR01031290.1                      | Apocrita; Aculeata; Vespoidea;<br>Formicidae; Amblyoponinae  |      |
|                      | 191 | 51 | <i>Exoneura robusta</i>             |           |                                                                 |   |                                     | Apocrita; Aculeata; Apoidea;<br>Apidae; Xylocopinae          | bees |
|                      | 192 | 52 | <i>Habropoda laboriosa</i>          |           |                                                                 |   |                                     | Apocrita; Aculeata; Apoidea;<br>Apidae; Anthophorinae        |      |
|                      | 193 | 53 | <i>Melipona quadrifasciata</i>      |           |                                                                 |   |                                     | Apocrita; Aculeata; Apoidea;<br>Apidae; Meliponinae          |      |
|                      | 194 | 54 | <i>Apis mellifera</i>               |           |                                                                 |   |                                     | Apocrita; Aculeata; Apoidea;<br>Apidae; Apinae               |      |
|                      | 195 | 55 | <i>Apis dorsata</i>                 |           |                                                                 |   |                                     | Apocrita; Aculeata; Apoidea;<br>Apidae; Apinae               |      |
|                      | 196 | 56 | <i>Apis florea</i>                  |           |                                                                 |   |                                     | Apocrita; Aculeata; Apoidea;<br>Apidae; Apinae               |      |
|                      | 197 | 57 | <i>Apis cerana</i>                  |           |                                                                 |   |                                     | Apocrita; Aculeata; Apoidea;<br>Apidae; Apinae               |      |
|                      | 198 | 58 | <i>Bombus impatiens</i>             |           |                                                                 |   |                                     | Apocrita; Aculeata; Apoidea;<br>Apidae; Bombinae             |      |
|                      | 199 | 59 | <i>Bombus terrestris</i>            |           |                                                                 |   |                                     | Apocrita; Aculeata; Apoidea;<br>Apidae; Bombinae             |      |
|                      | 200 | 60 | <i>Dufourea novaeangliae</i>        |           |                                                                 |   |                                     | Apocrita; Aculeata; Apoidea;<br>Halictidae; Rophitinae       |      |
|                      | 201 | 61 | <i>Lasioglossum albipes</i>         |           |                                                                 |   |                                     | Apocrita; Aculeata; Apoidea;<br>Halictidae; Halictinae       |      |
|                      | 202 | 62 | <i>Megachile rotundata</i>          |           |                                                                 |   |                                     | Apocrita; Aculeata; Apoidea;<br>Megachilidae; Megachilinae   |      |
| <b>Raphidioptera</b> | 203 | 1  | <i>Inocellia crassicornis</i>       | +         | GAZH01017073.1                                                  | + | GAZH01092118.1                      | Inocelliidae                                                 |      |
|                      | 204 | 2  | <i>Xanthostigma xanthostigma</i>    |           |                                                                 |   |                                     | Raphidiidae                                                  |      |
| <b>Megaloptera</b>   | 205 | 1  | <i>Corydalus cornutus</i>           | CLITNCPRG | GATG01039646.1                                                  | + | GATG01035419.1                      | Corydalidae                                                  |      |
|                      | 206 | 2  | <i>Sialis lutaria</i>               |           |                                                                 |   |                                     | Sialidae                                                     |      |
| <b>Neuroptera</b>    | 207 | 1  | <i>Conwentzia psociformis</i>       |           |                                                                 | + | GAYH01081470.1                      | Coniopterygidae                                              |      |
|                      | 208 | 2  | <i>Osmylus fulvicephalus</i>        | +         | GAYC01082079.1                                                  | + | GAYC01075986.1                      | Osmylidae                                                    |      |
|                      | 209 | 3  | <i>Pseudomallada prasinus</i>       | CLITNCPRG | GAVV02007136.1                                                  |   |                                     | Chrysopidae                                                  |      |
|                      | 210 | 4  | <i>Chrysopa pallens</i>             |           |                                                                 | + | GAGF01046297.1                      | Chrysopidae                                                  |      |

|                                |     |                           |                                       |                        |                                                |   |                |                                            |                                                                                               |
|--------------------------------|-----|---------------------------|---------------------------------------|------------------------|------------------------------------------------|---|----------------|--------------------------------------------|-----------------------------------------------------------------------------------------------|
|                                | 211 | 5                         | <i>Euroleon nostras</i>               |                        |                                                |   |                |                                            | Myrmeleontidae                                                                                |
| <b>Strepsiptera</b>            | 212 | 1                         | <i>Mengenilla moldrzyki</i>           |                        |                                                |   |                |                                            | Mengenillidia; Mengenilloidea; Mengenillidae                                                  |
|                                | 213 | 2                         | <i>Stylops melittae</i>               |                        |                                                |   |                |                                            | Stylopidia; Stylopidae                                                                        |
| <b>Coleoptera</b>              | 214 | 1                         | <i>Aleochara curtula</i>              | CLITNCPRG              | GATW01005644.1                                 | + |                | GATW01023067.1                             | Polyphaga; Staphyliniformia; Staphylinioidea; Staphylinidae; Tachyporinae group; Aleocharinae |
|                                | 215 | 2                         | <i>Nicrophorus vespilloides</i>       | CLITNCPRG              | LJCH01004160.1                                 | + |                | GDKQ01006510.1                             | Polyphaga; Staphyliniformia; Staphylinioidea; Silphidae; Nicrophorinae                        |
|                                | 216 | 3                         | <i>Dendroctonus frontalis</i>         |                        |                                                | + |                | GAFI01014329.1                             | Polyphaga; Cucujiformia; Curculionioidea; Curculionidae; Scolytinae                           |
|                                | 217 | 4                         | <i>Dendroctonus ponderosae</i>        | CLITNCPRG              | APGL01028326.1; GAFX01014170.1                 |   |                |                                            | Polyphaga; Cucujiformia; Curculionioidea; Curculionidae; Scolytinae                           |
|                                | 218 | 5                         | <i>Hypothenemus hampei</i>            | CLITNCPRG              | LBGY01005928.1                                 | + |                | LBGY01001191.1                             | Polyphaga; Cucujiformia; Curculionioidea; Curculionidae; Scolytinae                           |
|                                | 219 | 6                         | <i>Dastarcus helophoroides</i>        | +                      | GBCX01024478.1; 5-211                          |   |                |                                            | Polyphaga; Cucujiformia; Cucujoidea; Bothrideridae                                            |
|                                | 220 | 7                         | <i>Aethina tumida</i>                 | +                      | GCKB01019799.1; 156-437                        | + |                | GCKB01003102.1                             | Polyphaga; Cucujiformia; Cucujoidea; Nitidulidae; Nitidulinae                                 |
|                                | 221 | 8                         | <i>Meloe violaceus</i>                | CLITNCPRG              | GATA01002325.1                                 | + |                | GATA01005266.1                             | Polyphaga; Cucujiformia; Tenebrionoidea; Meloidae                                             |
|                                | 222 | 9                         | <i>Tribolium castaneum</i>            | CLITNCPRG              | NP_001078831.1                                 | + |                | A3RE84                                     | Polyphaga; Cucujiformia; Tenebrionoidea; Tenebrionidae                                        |
|                                | 223 | 10                        | <i>Anoplophora glabripennis</i>       | CLITNCPRG              | AQHT01068515.1                                 | + |                | AQHT01068175.1                             | Polyphaga; Cucujiformia; Chrysomeloidea; Cerambycidae; Lamiinae                               |
|                                | 224 | 11                        | <i>Diabrotica virgifera virgifera</i> | +                      | EW761630:18-293                                |   |                |                                            | Polyphaga; Cucujiformia; Chrysomeloidea; Chrysomelidae; Galerucinae                           |
|                                | 225 | 12                        | <i>Leptinotarsa decemlineata</i>      | CLITNCPKG<br>CLITNCPIG | AYNB011151526.1                                | + |                | AYNB01191279.1                             | Polyphaga; Cucujiformia; Chrysomeloidea; Chrysomelidae; Chrysomelinae                         |
|                                | 226 | 13                        | <i>Onthophagus taurus</i>             | CLITNCPRG              | JHOM01000375.1                                 |   |                | JHOM01025934.1                             | Polyphaga; Scarabaeiformia; Scarabaeoidea; Scarabaeidae; Scarabaeinae; Scarabaeinae           |
|                                | 227 | 14                        | <i>Oryctes borbonicus</i>             | CLITNCPRG              | LJIG01009187.1                                 | + |                | LJIG01025627.1                             | Polyphaga; Scarabaeiformia; Scarabaeoidea; Scarabaeidae; Dynastinae                           |
|                                | 228 | 15                        | <i>Agrilus planipennis</i>            | CLITNCPRG              | JENH01072924.1                                 | + |                | JENH01056123.1                             | Polyphaga; Elateriformia; Buprestoidea; Buprestidae; Agrilinae                                |
|                                | 229 | 16                        | <i>Lepicerus sp.</i>                  | +                      | GAZB01101514.1; GAZB01008737.1; GAZB01008738.1 |   |                |                                            | Myxophaga; Lepiceridae                                                                        |
|                                | 230 | 17                        | <i>Priacma serrata</i>                | CLITNCPRG              | GACO01007629.1                                 |   |                |                                            | Archostemata; Cupedidae                                                                       |
| 231                            | 18  | <i>Gyrinus marinus</i>    | CLITNCPRG                             | GAUY01035880.1         | +                                              |   | GAUY01010995.1 | Adephaga; Gyrinoidea; Gyrinidae            |                                                                                               |
| 232                            | 19  | <i>Pogonus chalceus</i>   | +                                     | JU438286.1; 2-208      | +                                              |   | JU436954.1     | Adephaga; Caraboidea; Carabidae; Trechinae |                                                                                               |
| 233                            | 20  | <i>Carabus granulatus</i> |                                       |                        | +                                              |   | GACW01037691.1 | Adephaga; Caraboidea; Carabidae; Carabinae |                                                                                               |
| <b>Trichoptera</b>             | 234 | 1                         | <i>Rhyacophila fasciata</i>           |                        |                                                |   |                |                                            |                                                                                               |
|                                | 235 | 2                         | <i>Platycentropus radiatus</i>        |                        |                                                |   |                |                                            |                                                                                               |
|                                | 236 | 3                         | <i>Hydroptila spp.</i>                |                        |                                                |   |                |                                            |                                                                                               |
|                                | 237 | 4                         | <i>Philopotamus ludificatus</i>       |                        |                                                |   |                |                                            |                                                                                               |
|                                | 238 | 5                         | <i>Annulipalpia sp.</i>               |                        |                                                |   |                |                                            |                                                                                               |
| <b>Lepidoptera<sup>c</sup></b> | 239 | 1                         | <i>Micropterix calthella</i>          |                        |                                                |   |                |                                            |                                                                                               |
|                                | 240 | 2                         | <i>Dyseriocrania subpurpurella</i>    |                        |                                                |   |                |                                            |                                                                                               |
|                                | 241 | 3                         | <i>Triodia sylvina</i>                |                        |                                                |   |                |                                            |                                                                                               |
|                                | 242 | 4                         | <i>Nemophora degeerella</i>           |                        |                                                |   |                |                                            |                                                                                               |
|                                | 243 | 5                         | <i>Yponomeuta evonymella</i>          |                        |                                                |   |                |                                            |                                                                                               |
|                                | 244 | 6                         | <i>Zygaena fausta</i>                 |                        |                                                |   |                |                                            |                                                                                               |
|                                | 245 | 7                         | <i>Polyommatus icarus</i>             |                        |                                                |   |                |                                            |                                                                                               |
|                                | 246 | 8                         | <i>Parides eurimedes</i>              |                        |                                                |   |                |                                            |                                                                                               |
|                                | 247 | 9                         | <i>Bombyx mori</i>                    |                        |                                                |   |                |                                            |                                                                                               |



|                            |     |    |                                     |           |                |   |                |
|----------------------------|-----|----|-------------------------------------|-----------|----------------|---|----------------|
|                            | 248 | 10 | <i>Manduca sexta</i>                |           |                |   |                |
| <b>Siphonaptera</b>        | 249 | 1  | <i>Ceratophyllus gallinae</i>       |           |                |   |                |
|                            | 250 | 2  | <i>Archaeopsylla erinacei</i>       |           |                |   |                |
|                            | 251 | 3  | <i>Ctenocephalides felis</i>        |           |                |   |                |
| <b>Mecoptera</b>           | 252 | 1  | <i>Boreus hyemalis</i>              |           |                |   |                |
|                            | 253 | 2  | <i>Nannochorista philpotti</i>      |           |                |   |                |
|                            | 254 | 3  | <i>Bittacus pilicornis</i>          |           |                |   |                |
|                            | 255 | 4  | <i>Panorpa vulgaris</i>             |           |                |   |                |
| <b>Diptera<sup>c</sup></b> | 256 | 1  | <i>Anopheles gambiae</i>            |           |                |   |                |
|                            | 257 | 2  | <i>Aedes aegypti</i>                |           |                |   |                |
|                            | 258 | 3  | <i>Phlebotomus papatasi</i>         |           |                |   |                |
|                            | 259 | 4  | <i>Trichocera saltator</i>          |           |                |   |                |
|                            | 260 | 5  | <i>Tipula maxima</i>                |           |                |   |                |
|                            | 261 | 6  | <i>Bibio marci</i>                  |           |                |   |                |
|                            | 262 | 7  | <i>Bombylius major</i>              |           |                |   |                |
|                            | 263 | 8  | <i>Drosophila melanogaster</i>      |           |                |   |                |
|                            | 264 | 9  | <i>Lipara lucens</i>                |           |                |   |                |
|                            | 265 | 10 | <i>Rhagoletis pomonella</i>         |           |                |   |                |
|                            | 266 | 11 | <i>Glossina morsitans morsitans</i> |           |                |   |                |
|                            | 267 | 12 | <i>Sarcophaga crassipalpis</i>      |           |                |   |                |
|                            | 268 | 13 | <i>Arachnocampa luminosa</i>        | CYITNCPWG | GDQV01021566.1 | + | GDQV01043269.1 |
|                            | 269 | 14 | <i>Triarthria setipennis</i>        |           |                |   |                |

Colour codes: only oxytocin-like precursor or receptor both oxytocin-like precursor and receptor genomes available more than 1 receptor/precursor sequence not annotated

<sup>a</sup>Three first groups of Arthropoda (Chelicerata, Myriapoda and Crustaceans, underlined) represent subphylum; all others are orders of the subphylum Hexapoda; the class Insecta comprises the orders from Archaeognatha to Diptera.

<sup>b</sup>Number of '+' shows the number of different found receptor copies.

<sup>c</sup>Not all negative hits were included although 99 Diptera and 25 Lepidoptera species found in the NCBI genome database (13<sup>th</sup> of April 2016) were included in the analysis.

**Supplementary Table S2. List of species and accession numbers used to prepare dataset**

| <b>Organism<sup>a</sup></b>   | <b>BioProject ID</b> | <b>BioSample Accession</b> | <b>Transcriptome Accession</b> | <b>Download source</b> |
|-------------------------------|----------------------|----------------------------|--------------------------------|------------------------|
| Acanthocasuarina muellerianae | 219519               | SAMN02047100               | GAYY00000000                   | NCBI, TSA              |
| Acanthosoma haemorrhoidale    | 219520               | SAMN02047154               | GAUV00000000                   | NCBI, TSA              |
| Acerentomon sp. AD-2013       | 219521               | SAMN02047102               | GAXE00000000                   | NCBI, TSA              |
| Aleochara curtula             | 219522               | SAMN02047128               | GATW00000000                   | NCBI, TSA              |
| Annulipalpia sp. AD-2013      | 219539               | SAMN02047195               | GATX00000000                   | NCBI, TSA              |
| Anurida maritima              | 219523               | SAMN02047180               | GAUE00000000                   | NCBI, TSA              |
| Apachyus charteceus           | 219524               | SAMN02047175               | GAUW00000000                   | NCBI, TSA              |
| Aposthonia japonica           | 219525               | SAMN02047170               | GAWU00000000                   | NCBI, TSA              |
| Aretaon asperimus             | 219526               | SAMN02047129               | GAZQ00000000                   | NCBI, TSA              |
| Atelura formicaria            | 219527               | SAMN02047107               | GAYJ00000000                   | NCBI, TSA              |
| Baetis sp. AD-2013            | 219528               | SAMN02047149               | GATU00000000                   | NCBI, TSA              |
| Bibio marci                   | 219529               | SAMN02047144               | GATJ00000000                   | NCBI, TSA              |
| Bittacus pilicornis           | 219530               | SAMN02047197               | GATH00000000                   | NCBI, TSA              |
| Blaberus atropos              | 219531               | SAMN02047121               | GAYD00000000                   | NCBI, TSA              |
| Bombylius major               | 219532               | SAMN02047145               | GATI00000000                   | NCBI, TSA              |
| Boreus hyemalis               | 219533               | SAMN02047164               | GAYK00000000                   | NCBI, TSA              |
| Calopteryx splendens          | 219534               | SAMN02047184               | GAYM00000000                   | NCBI, TSA              |
| Campodea augens               | 219535               | SAMN02047108               | GAYN00000000                   | NCBI, TSA              |
| Ceratophyllus gallinae        | 219536               | SAMN02047116               | GAWK00000000                   | NCBI, TSA              |
| Cercopis vulnerata            | 219537               | SAMN02047155               | GAUN00000000                   | NCBI, TSA              |
| Ceuthophilus sp. AD-2013      | 219538               | SAMN02047189               | GAUX00000000                   | NCBI, TSA              |
| Chrysis viridula              | 219540               | SAMN02047158               | GATY00000000                   | NCBI, TSA              |
| Conwentzia psociformis        | 219541               | SAMN02047147               | GAYH00000000                   | NCBI, TSA              |
| Cordulegaster boltonii        | 219542               | SAMN02047156               | GAYO00000000                   | NCBI, TSA              |
| Corydalus cornutus            | 219543               | SAMN02047201               | GATG00000000                   | NCBI, TSA              |
| Cosmioperla kuna              | 219544               | SAMN02047101               | GAYL00000000                   | NCBI, TSA              |
| Cotesia vestalis              | 219545               | SAMN02047178               | GAUP00000000                   | NCBI, TSA              |
| Cryptocercus wrighti          | 219546               | SAMN02047199               | GAZN00000000                   | NCBI, TSA              |
| Ctenocephalides felis         | 219547               | SAMN02047194               | GAYP00000000                   | NCBI, TSA              |
| Dyseriocrania subpurpurella   | 219549               | SAMN02047140               | GASY00000000                   | NCBI, TSA              |
| Ectopsocus briggsi            | 219550               | SAMN01801569               | GAPT00000000                   | NCBI, TSA              |
| Empusa pennata                | 219551               | SAMN02047168               | GAWT00000000                   | NCBI, TSA              |
| Ephemera danica               | 219552               | SAMN02047152               | GAUK00000000                   | NCBI, TSA              |
| Epiophlebia superstes         | 219553               | SAMN02047171               | GAVW00000000                   | NCBI, TSA              |
| Essigella californica         | 219554               | SAMN02047099               | GAZF00000000                   | NCBI, TSA              |
| Euroleon nostras              | 219555               | SAMN02047165               | GAXW00000000                   | NCBI, TSA              |
| Eurylophella sp. AD-2013      | 219556               | SAMN02047200               | GAZG00000000                   | NCBI, TSA              |
| Folsomia candida              | 219557               | SAMN02047120               | GASX00000000                   | NCBI, TSA              |
| Forficula auricularia         | 219558               | SAMN02047143               | GAYQ00000000                   | NCBI, TSA              |
| Frankliniella cephalica       | 219559               | SAMN02047110               | GAYE00000000                   | NCBI, TSA              |
| Galloisiana yuasai            | 219560               | SAMN02047172               | GAWN00000000                   | NCBI, TSA              |
| Grylloblatta                  | 219561               | SAMN02047192               | GAWP00000000                   | NCBI, TSA              |

## bifratrilecta

|                                      |        |              |              |           |
|--------------------------------------|--------|--------------|--------------|-----------|
| <i>Gryllotalpa</i> sp. AD-2013       | 219562 | SAMN02047167 | GAWZ00000000 | NCBI, TSA |
| <i>Gynaikothrips ficorum</i>         | 219563 | SAMN02047111 | GAXG00000000 | NCBI, TSA |
| <i>Gyrinus marinus</i>               | 219564 | SAMN02047132 | GAUY00000000 | NCBI, TSA |
| <i>Haploembia palaui</i>             | 219565 | SAMN02047183 | GAZA00000000 | NCBI, TSA |
| <i>Hydroptila</i> sp. AD-2013        | 219566 | SAMN02047190 | GAVM00000000 | NCBI, TSA |
| <i>Inocellia crassicornis</i>        | 219567 | SAMN02047103 | GAZH00000000 | NCBI, TSA |
| <i>Isonychia bicolor</i>             | 219568 | SAMN02047198 | GAXA00000000 | NCBI, TSA |
| <i>Lepicerus</i> sp. AD-2013         | 219569 | SAMN02047177 | GAZB00000000 | NCBI, TSA |
| <i>Leptopilina clavipes</i>          | 219570 | SAMN02047179 | GAXY00000000 | NCBI, TSA |
| <i>Leuctra</i> sp. AD-2013           | 219571 | SAMN02047153 | GAUF00000000 | NCBI, TSA |
| <i>Lipara lucens</i>                 | 219572 | SAMN02047130 | GAZD00000000 | NCBI, TSA |
| <i>Liposcelis bostrychophila</i>     | 219573 | SAMN02047187 | GAYV00000000 | NCBI, TSA |
| <i>Machilis hrabei</i>               | 219574 | SAMN02047109 | GAUM00000000 | NCBI, TSA |
| <i>Mantis religiosa</i>              | 219575 | SAMN02047157 | GASW00000000 | NCBI, TSA |
| <i>Mastotermes darwiniensis</i>      | 219576 | SAMN02047123 | GAZE00000000 | NCBI, TSA |
| <i>Meinertellus cundinamarcensis</i> | 219577 | SAMN02047182 | GAUG00000000 | NCBI, TSA |
| <i>Meloe violaceus</i>               | 219578 | SAMN02047163 | GATA00000000 | NCBI, TSA |
| <i>Menopon gallinae</i>              | 219579 | SAMN02047141 | GAWR00000000 | NCBI, TSA |
| <i>Metallyticus splendidus</i>       | 219580 | SAMN02047174 | GATB00000000 | NCBI, TSA |
| <i>Nemophora degeerella</i>          | 219581 | SAMN02047104 | GATC00000000 | NCBI, TSA |
| <i>Nilaparvata lugens</i>            | 219582 | SAMN02047185 | GAYF00000000 | NCBI, TSA |
| <i>Notostira elongata</i>            | 219583 | SAMN02047151 | GASV00000000 | NCBI, TSA |
| <i>Occasjapyx japonicus</i>          | 219584 | SAMN02047169 | GAXJ00000000 | NCBI, TSA |
| <i>Okanagana villosa</i>             | 219585 | SAMN02047193 | GAWQ00000000 | NCBI, TSA |
| <i>Orussus abietinus</i>             | 219586 | SAMN02047118 | GAUJ00000000 | NCBI, TSA |
| <i>Osmylus fulvicephalus</i>         | 219587 | SAMN02047166 | GAYC00000000 | NCBI, TSA |
| <i>Panorpa vulgaris</i>              | 219588 | SAMN02047142 | GAUH00000000 | NCBI, TSA |
| <i>Parides eurimedes</i>             | 219589 | SAMN02047186 | GAXH00000000 | NCBI, TSA |
| <i>Periplaneta americana</i>         | 219590 | SAMN02047124 | GAWS00000000 | NCBI, TSA |
| <i>Perla marginata</i>               | 219591 | SAMN02047115 | GATV00000000 | NCBI, TSA |
| <i>Peruphasma schultei</i>           | 219592 | SAMN02047114 | GAWJ00000000 | NCBI, TSA |
| <i>Planococcus citri</i>             | 219593 | SAMN02047127 | GAXF00000000 | NCBI, TSA |
| <i>Platycentropus radiatus</i>       | 219594 | SAMN02047196 | GASS00000000 | NCBI, TSA |
| <i>Pogonognathellus</i> sp. AD-2013  | 219595 | SAMN02047134 | GATD00000000 | NCBI, TSA |
| <i>Polyommatus icarus</i>            | 219596 | SAMN02047136 | GAST00000000 | NCBI, TSA |
| <i>Prorhinotermes simplex</i>        | 219597 | SAMN02047122 | GASE00000000 | NCBI, TSA |
| <i>Prosarthria teretirostris</i>     | 219598 | SAMN02047125 | GAZT00000000 | NCBI, TSA |
| <i>Pseudomallada prasinus</i>        | 219548 | SAMN02047105 | GAVV00000000 | NCBI, TSA |
| <i>Ranatra linearis</i>              | 219599 | SAMN02047138 | GAYZ00000000 | NCBI, TSA |
| <i>Rhyacophila fasciata</i>          | 219600 | SAMN02047161 | GAXX00000000 | NCBI, TSA |
| <i>Sminthurus viridis</i>            | 219601 | SAMN02047148 | GATZ00000000 | NCBI, TSA |
| <i>Stenobothrus lineatus</i>         | 219602 | SAMN02047137 | GAUZ00000000 | NCBI, TSA |

|                                      |        |              |              |           |
|--------------------------------------|--------|--------------|--------------|-----------|
| <i>Stylops melittae</i>              | 219603 | SAMN02047139 | GAZM00000000 | NCBI, TSA |
| <i>Tanzaniophasma</i> sp.<br>AD-2013 | 219604 | SAMN02047176 | GAXB00000000 | NCBI, TSA |
| <i>Tenthredo koehleri</i>            | 219605 | SAMN02047159 | GAWW00000000 | NCBI, TSA |
| <i>Tetrix subulata</i>               | 219606 | SAMN02047150 | GASQ00000000 | NCBI, TSA |
| <i>Tetrodontophora bielanensis</i>   | 219607 | SAMN02047160 | GAXI00000000 | NCBI, TSA |
| <i>Thermobia domestica</i>           | 219608 | SAMN02047119 | GASN00000000 | NCBI, TSA |
| <i>Thrips palmi</i>                  | 219609 | SAMN02047112 | GAXC00000000 | NCBI, TSA |
| <i>Timema cristinae</i>              | 219610 | SAMN02047191 | GAVX00000000 | NCBI, TSA |
| <i>Trialeurodes vaporariorum</i>     | 219611 | SAMN02047126 | GAWX00000000 | NCBI, TSA |
| <i>Triarthria setipennis</i>         | 219612 | SAMN02047117 | GAVA00000000 | NCBI, TSA |
| <i>Trichocera saltator</i>           | 219613 | SAMN02047162 | GAXZ00000000 | NCBI, TSA |
| <i>Tricholepidion gertschi</i>       | 219614 | SAMN02047188 | GASO00000000 | NCBI, TSA |
| <i>Triodia sylvina</i>               | 219615 | SAMN02047133 | GAVB00000000 | NCBI, TSA |
| <i>Velia caprai</i>                  | 219616 | SAMN02047131 | GAUO00000000 | NCBI, TSA |
| <i>Xanthostigma xanthostigma</i>     | 219617 | SAMN02047106 | GAUI00000000 | NCBI, TSA |
| <i>Xenophysella greensladeae</i>     | 219618 | SAMN02047181 | GAYI00000000 | NCBI, TSA |
| <i>Yponomeuta evonymellus</i>        | 219619 | SAMN02047146 | GASG00000000 | NCBI, TSA |
| <i>Zorotypus caudelli</i>            | 219620 | SAMN02047173 | GAYA00000000 | NCBI, TSA |
| <i>Zygaena fausta</i>                | 219621 | SAMN02047113 | GAYB00000000 | NCBI, TSA |

| <b>Organism<sup>b</sup></b>         | <b>Download source</b>      | <b>Accession / Version</b> |
|-------------------------------------|-----------------------------|----------------------------|
| <i>Acromyrmex echinator</i>         | Hymenoptera genome database | Aech_2.0                   |
| <i>Acyrtosiphon pisum</i>           | AphidBase                   | ACYPI v2.0                 |
| <i>Aedes aegypti</i>                | VectorBase                  | AaegL3.3                   |
| <i>Anopheles gambiae</i>            | VectorBase                  | AgamP4.3                   |
| <i>Aphis gossypii</i>               | NCBI, TSA                   | GW572841.1                 |
| <i>Apis mellifera</i>               | Hymenoptera genome database | Amel_4.5                   |
| <i>Archaeopsylla erinacei</i>       | NCBI, TSA                   | GABB01000001.1             |
| <i>Bemisia tabaci</i>               | NCBI, TSA                   | GAPP01000001.1             |
| <i>Bombus terrestris</i>            | NCBI, TSA                   | JL856152.1                 |
| <i>Bombyx mori</i>                  | NCBI, TSA                   | EL645743.1                 |
| <i>Carabus granulatus</i>           | NCBI, TSA                   | GACW01000001.1             |
| <i>Celuca pugilator</i>             | NCBI, TSA                   | JO494914.1                 |
| <i>Cyprinidinae</i> sp.             | NCBI, TSA                   | JL207200.1                 |
| <i>Daphnia pulex</i>                | NCBI, TSA                   | FE425512.1                 |
| <i>Dendroctonus ponderosae</i>      | NCBI, TSA                   | GAFW01000001.1             |
| <i>Drosophila melanogaster</i>      | FlyBase                     | dmel_r6.03                 |
| <i>Exoneura robusta</i>             | NCBI, TSA                   | HP931235.1                 |
| <i>Glomeris pustulata</i>           | NCBI, TSA                   | GAKW01000001.1             |
| <i>Glossina morsitans morsitans</i> | NCBI, TSA                   | DV619302.1                 |
| <i>Harpegnathos saltator</i>        | Hymenoptera genome database | Hsal_3.3                   |
| <i>Ixodes scapularis</i>            | VectorBase                  | IscaW1.4                   |
| <i>Lepeophtheirus</i>               | NCBI, TSA                   | JP350109.1                 |

salmonis

|                             |                             |                 |
|-----------------------------|-----------------------------|-----------------|
| Litopenaeus vancouverensis  | NCBI, TSA                   | JP403722.1      |
| Manduca sexta               | NCBI, TSA                   | JO840459.1      |
| Mengenilla moldrzyki        | NCBI, TSA                   | GACY01000001.1  |
| Micropterix calthella       | NCBI, TSA                   | GACP01000001.1  |
| Nannochorista philpotti     | NCBI, TSA                   | GADB01000001.1  |
| Nasonia vitripennis         | Hymenoptera genome database | Nvit_OGSv1.2    |
| Pediculus humanus           | VectorBase                  | PhumU2.1        |
| Philopotamus ludificatus    | NCBI, TSA                   | GACV01000001.1  |
| Phlebotomus papatasi        | NCBI, TSA                   | JP555361.1      |
| Priacma serrata             | NCBI, TSA                   | GACO01000001.1  |
| Rhagoletis pomonella        | NCBI, TSA                   | EZ140167.2      |
| Sarcophaga crassipalpis     | NCBI, TSA                   | EZ617705.1      |
| Sarsinebalia urgorrii       | NCBI, TSA                   | JL099665.1      |
| Sialis lutaria              | NCBI, TSA                   | GABK01000001.1  |
| Speleonectes cf. tulumensis | NCBI, TSA                   | JL207199.1      |
| Symphylella vulgaris        | NCBI, TSA                   | GAKX01000001.1  |
| Tipula maxima               | NCBI, TSA                   | GACZ01000001.1  |
| Tribolium castaneum         | BeetleBase                  | Tcas_4.0        |
| Zootermopsis nevadensis     | Ensemblgenomes              | GCA_000696155.1 |

## Supplementary References

- 1 Pitti, T. & Manoj, N. Molecular evolution of the neuropeptide S receptor. *PLoS One* **7**, e34046, (2012).
- 2 Meyer-Rochow, V. B. Glowworms: a review of *Arachnocampa* spp. and kin. *Luminescence* **22**, 251-265, (2007).
- 3 Pugsley, C. W. Literature-Review of the New-Zealand Glowworm *Arachnocampa-Luminosa* (Diptera, Keroplatidae) and Related Cave-Dwelling Diptera. *N. Z. Entomol.* **7**, 419-424, (1983).
- 4 Lee, B. Y. *et al.* Whole transcriptome analysis of the monogonont rotifer *Brachionus koreanus* provides molecular resources for developing biomarkers of carbohydrate metabolism. *Comp. Biochem. Physiol., D: Genomics & Proteomics* **14**, 33-41, (2015).
- 5 Crisp, A., Boschetti, C., Perry, M., Tunnacliffe, A. & Micklem, G. Expression of multiple horizontally acquired genes is a hallmark of both vertebrate and invertebrate genomes. *Genome Biol.* **16**, 50, (2015).
- 6 Dunning Hotopp, J. C. *et al.* Widespread lateral gene transfer from intracellular bacteria to multicellular eukaryotes. *Science* **317**, 1753-1756, (2007).
- 7 Gasmi, L. *et al.* Recurrent Domestication by Lepidoptera of Genes from Their Parasites Mediated by Bracoviruses. *PLoS Genet.* **11**, e1005470, (2015).
- 8 Kirsch, R., Heckel, D. G. & Pauchet, Y. How the rice weevil breaks down the pectin network: Enzymatic synergism and sub-functionalization. *Insect Biochem. Mol. Biol.* **71**, 72-82, (2016).
- 9 Moran, N. A. & Jarvik, T. Lateral transfer of genes from fungi underlies carotenoid production in aphids. *Science* **328**, 624-627, (2010).
- 10 Zolfaghari Emameh, R., Barker, H. R., Tolvanen, M. E., Parkkila, S. & Hytonen, V. P. Horizontal transfer of beta-carbonic anhydrase genes from prokaryotes to protozoans, insects, and nematodes. *Parasit. Vectors* **9**, 152, (2016).
